# Supplementary material for: The autophagy adaptor NDP52 and the FIP200 coiled-coil allosterically activate ULK1 complex membrane recruitment
Source: eLife. 2020 Aug 10;9:e59099. doi: 10.7554/eLife.59099 (PMC7447430; doi:10.7554/eLife.59099)
Supplement: Figure 1—figure supplement 2—source data 1. [file elife-59099-fig1-figsupp2-data1.xlsx]

## Sheet: Sheet1
ADP Glo kinase assay	ULKtide	ULK1c	ULK1c + ULKtide			Pulldown efficiency	Control	GST-NDP52	GST-4*Ub
repeat1	2951.9	12328.8	24727.4			repeat1	Null	0.585871	0.0334055
repeat2	3098.3	13643.4	25676.7			repeat2	0.03748	0.534438	0.0508822
repeat3	3603.6	13569.5	25307.7			repeat3	0.0385759	0.509253	0.0446835
repeat4	3561.6	17773.6	26327			repeat4	0.021295	0.526668	0.0385879
repeat5	4247.1	14950.1	27870.7
						Mean	0.0324503	0.539058	0.0418898
	ULKtide	ULK1c	ULK1c+ULKtide			STDEV	0.00967632	0.0329374	0.00756204
Mean	3492.5	14453.1	25981.9
STDEV	508.473	2074.95	1205
