# Supplementary material for: The autophagy adaptor NDP52 and the FIP200 coiled-coil allosterically activate ULK1 complex membrane recruitment
Source: eLife. 2020 Aug 10;9:e59099. doi: 10.7554/eLife.59099 (PMC7447430; doi:10.7554/eLife.59099)
Supplement: Figure 2—source data 1. [file elife-59099-fig2-data1.xlsx]

## Sheet: Sheet1
	Concentration of Cargo adaptors (uM)	0.1	0.3	1
repeat1	GST-NDP52+GFP-FIP200-MBP/ATG13/ATG101/ULK1	0.252881	0.539015	0.595135
	GST-NDP52+GFP-FIP200-MBP	0.22342	0.577353	0.688669
repeat2	GST-NDP52+GFP-FIP200-MBP/ATG13/ATG101/ULK1	0.384364	0.654887	0.575143
	GST-NDP52+GFP-FIP200-MBP	0.418835	0.711677	0.569454
repeat3	GST-NDP52+GFP-FIP200-MBP/ATG13/ATG101/ULK1	0.303551	0.511648	0.45983
	GST-NDP52+GFP-FIP200-MBP	0.282646	0.414925	0.531951
repeat4	GST-NDP52+GFP-FIP200-MBP/ATG13/ATG101/ULK1	0.168963	0.43935	0.478484
	GST-NDP52+GFP-FIP200-MBP	0.281396	0.538604	0.606895
Mean	Concentration of Cargo adaptors (uM)	0.1	0.3	1
	GST-NDP52+GFP-FIP200-MBP/ATG13/ATG101/ULK1	0.27744	0.536225	0.527148
	GST-NDP52+GFP-FIP200-MBP	0.301574	0.56064	0.599242
STDEV
	GST-NDP52+GFP-FIP200-MBP/ATG13/ATG101/ULK1	0.0903419	0.0895868	0.0678861
	GST-NDP52+GFP-FIP200-MBP	0.082913	0.122215	0.0670103
