# Supplementary material for: The autophagy adaptor NDP52 and the FIP200 coiled-coil allosterically activate ULK1 complex membrane recruitment
Source: eLife. 2020 Aug 10;9:e59099. doi: 10.7554/eLife.59099 (PMC7447430; doi:10.7554/eLife.59099)
Supplement: Figure 4—source data 1. [file elife-59099-fig4-data1.xlsx]

## Sheet: FIP
time points	average intensities of GUV vesicles
1	10.0269	11.7683	13.3531	10.4951	12.1043	17.8295	16.7691	25.6503	12.6291	19.6806
2	10.7552	11.1016	13.6114	11.4029	13.1581	18.5482	15.3299	23.6114	13.0612	19.9283
3	10.3203	11.3561	13.8967	10.3567	12.8205	17.8507	15.7734	22.6927	12.4704	20.4654
4	11.0311	11.0351	14.561	11.0633	13.8552	17.6092	15.3275	23.2869	12.7494	20.7242
5	10.2946	13.466	14.8883	11.7013	13.9014	17.2349	13.9786	23.8673	14.0635	20.6438
6	10.5608	13.5756	14.0714	11.2759	12.85	16.511	13.3948	23.6009	14.0408	20.8932
7	11.7815	13.864	14.9393	10.9644	13.2106	18.5765	15.9095	24.4579	12.7708	20.1395
8	12.6605	13.7172	14.1288	11.1809	15.492	18.0566	15.8599	24.0017	14.0967	20.5413
9	11.9452	12.1043	14.692	11.2744	13.1264	16.7918	16.2683	24.4366	13.909	20.9377
10	10.9974	12.0958	14.7052	11.1659	13.5748	17.1176	15.3081	23.4412	13.1981	20.494
11	12.3054	12.4364	14.802	10.9643	13.7002	17.3562	14.8948	24.4974	13.5684	21.2977
12	12.1746	11.8843	14.8981	10.938	12.8508	16.7139	15.0384	23.7608	13.8056	21.2538
13	11.8394	11.4483	15.1371	10.9468	13.0552	18.4022	15.1445	23.8898	14.1945	22.8476
14	13.2673	11.8089	15.8962	10.8544	12.4552	17.7774	15.6166	24.4162	14.054	22.2984
15	12.9388	10.9627	14.7499	11.556	12.7329	16.9276	15.1953	23.6697	13.0504	23.002
16	12.4658	11.6788	15.1342	11.3701	14.0196	16.8834	15.4638	24.5192	14.2679	22.7317
17	12.1736	11.5081	15.4053	11.7833	13.8769	18.6207	15.1011	24.0261	13.7236	21.7633
18	11.8247	11.9401	15.6158	10.8054	12.2477	17.6492	15.9827	24.507	14.5745	22.4951
19	11.9857	11.4659	14.7099	11.3962	13.1095	18.3943	15.8465	24.2776	15.148	22.8542
20	12.4013	12.0966	14.8538	11.6046	12.6184	18.535	15.2743	23.8675	15.302	23.0661
21	12.0709	12.4714	16.7256	12.1947	13.475	17.886	16.1155	24.2611	14.0822	23.0537
22	11.4452	11.7131	15.3432	11.0773	14.7673	17.814	15.3278	23.4759	14.5082	22.4206
23	11.7402	11.5518	14.1677	11.501	14.269	17.4775	16.2475	23.1125	14.6521	22.3318
24	12.5103	11.3312	14.8013	11.047	15.0245	17.2499	15.498	23.0413	15.1261	22.791
25	11.6843	11.4122	14.2908	10.5347	13.7952	17.4546	15.8877	23.3272	15.2026	22.236
26	11.6029	10.9571	14.0223	10.9241	14.7991	18.0989	15.7767	21.7427	14.6776	22.644
27	11.8365	11.1423	14.2074	11.3216	13.9415	17.228	15.6297	22.5075	14.0099	22.6298
28	11.9113	12.0437	14.6261	11.7178	15.0143	18.1415	15.034	23.1766	14.0627	22.3938
29	11.9494	11.0945	13.802	11.1223	15.0587	16.9117	15.7154	23.4443	14.9742	22.4996
30	11.5796	11.2847	14.2227	10.9745	14.5516	19.5388	15.2992	23.1724	14.9284	21.9255

## Sheet: FIP+Ub
time points	average intensities of GUV vesicles
1	11.094	12.287	16.4199	19.001	21.8328	21.9881	26.5845	15.5762	20.0265	17.6645
2	10.8922	11.7274	15.9087	18.2547	20.3026	21.8927	26.6397	16.7093	18.3284	18.2326
3	11.692	11.9953	15.9153	18.2737	19.1029	21.4903	27.474	15.3248	18.8809	16.8943
4	11.1197	12.6745	16.0304	18.2281	19.6373	22.8553	27.5516	16.6266	19.513	17.9681
5	11.3692	11.5699	15.5146	18.6875	19.4313	23.0425	27.7143	15.785	17.1431	16.2493
6	11.026	12.8891	15.3848	18.877	19.1654	22.2034	27.7912	16.1139	18.1227	16.697
7	10.8584	11.7484	15.1453	18.7644	18.8309	22.5127	27.2843	16.3531	18.8858	16.4868
8	11.9866	10.9476	14.7701	18.8375	18.6381	21.8755	27.1504	16.8172	20.7018	17.3685
9	10.9268	10.9535	14.4009	18.012	18.3083	22.3294	26.9383	19.6938	19.5925	16.8185
10	9.7172	11.7519	14.8959	18.435	18.6381	22.5757	26.8553	15.9654	17.8984	16.3996
11	11.3716	11.8319	13.9938	18.0755	18.4673	21.6921	26.7031	13.1782	18.2856	16.2258
12	10.7876	11.4714	13.8453	17.9222	18.5372	20.8375	26.5931	13.1092	17.1407	16.6048
13	9.76212	11.1178	14.3508	18.1129	18.5128	21.3621	26.6706	12.7122	16.8493	17.5505
14	10.8793	11.7179	13.863	17.463	18.419	21.4975	26.4714	12.9082	17.1667	16.0841
15	9.4961	10.9962	14.7476	17.3214	17.8668	20.8167	26.7178	13.041	18.4367	16.7014
16	9.66886	12.4451	13.9521	17.6664	17.9463	21.3536	27.3487	12.8828	16.6506	15.8256
17	10.2802	10.9103	13.3948	17.1865	17.7949	20.5063	27.8246	13.4044	18.2379	16.6185
18	10.9358	10.8717	13.914	17.9746	18.3535	19.8897	27.546	14.0665	18.7894	16.6041
19	10.5442	11.6341	14.1492	17.3524	18.1512	19.8003	26.9661	14.4831	18.1467	16.8004
20	11.1543	11.7697	14.0635	17.3484	17.7028	19.3667	27.398	14.7189	17.7658	16.5086
21	11.8865	12.2397	14.5281	16.8	18.2946	19.3597	28.343	16.1212	18.0837	16.8247
22	13.077	11.801	13.5719	16.9171	17.4987	20.1624	27.0473	16.0868	17.7828	17.6449
23	13.2834	11.0977	14.0603	16.1577	17.8891	20.8284	26.9882	17.5473	18.4977	16.5068
24	12.6761	11.6186	14.0928	17.324	17.6764	20.0795	28.1601	17.1899	18.0934	16.9837
25	12.7298	10.6664	14.6223	16.8566	16.9366	20.4797	27.4052	16.9038	18.7845	18.2749
26	13.4317	12.2438	14.2454	15.9536	17.348	19.9056	27.9851	18.0359	19.045	17.1139
27	12.1834	9.75073	13.7166	15.8341	17.6081	20.3232	28.5422	18.0091	19.1414	16.8797
28	12.4599	10.8674	13.3107	16.486	17.7667	19.705	29.2042	18.2627	18.4673	17.5105
29	12.57	12.4091	12.7768	16.3694	17.9291	21.0644	28.1786	18.2516	19.4126	17.1792
30	12.9811	11.3311	13.0679	15.5869	17.3188	20.4254	27.9583	19.4812	17.8896	16.8552

## Sheet: HisNDP+FIP
time points	average intensities of GUV vesicles
1	111	114	102	73.3	97.9	70.1	96.8	139	99.7	82.5	68.7
2	117	108	108	89	85.6	65.7	110	115	94	83.2	72.4
3	115	113	119	79.2	90.3	71.6	91.5	70.7	99.7	88.9	82.5
4	109	102	110	92.3	90.2	65.6	99.5	109	96.2	100	73.2
5	92.4	106	105	86.5	105	69.4	106	135	101	85.7	77
6	93.9	89.8	101	82.2	102	85	116	120	91.9	75.5	68.4
7	83.9	89.2	108	92.6	106	63.6	94.7	87.1	105	90.1	69.7
8	86	107	97.8	83.5	113	79	94.5	111	82.3	90.2	70.1
9	75.1	87.8	96.8	106	106	71.8	87.5	92.5	90.7	91.1	64.2
10	68.6	97.2	93.8	81	112	71.4	90.1	73.3	97.5	76.2	67.6
11	68.3	81.6	116	82	111	64	75.1	54.9	95.3	70.3	65.2
12	84.6	81.2	105	91.8	106	62.2	101	78.9	91.7	82.9	64
13	59	77.9	103	96.5	114	80.4	95.3	69.3	89	81.9	70.2
14	68.2	88.1	114	82.5	122	70.4	84.2	90	93	81.8	72.6
15	69.7	68.7	97.3	92.8	112	66	99.1	126	79.2	82.3	76.5
16	95.3	77.3	89.2	88.7	114	63.1	77.4	97.4	85.2	81.7	65
17	89.2	67.7	108	103	120	63.3	83.9	60.6	74.3	84.8	71
18	75.5	76.3	87.2	99.2	112	59	75.3	91.1	76.2	78.2	68.3
19	95	84	88.6	90.9	108	60.9	90.6	96	70.4	83.2	65.6
20	74.9	80.9	91.8	86.4	97.8	68.2	75.2	58.8	72.2	75.4	71.3
21	82.3	94.1	95.5	84.3	102	66.2	88.7	86.3	76.9	76.2	72.5
22	83.7	93.7	87.9	75.4	114	60.6	82.5	82.4	65.6	90.1	77.6
23	71.4	82	81	86.2	117	59.8	68.4	90.4	80.4	82.4	81.7
24	83.7	77.1	74.1	92.4	107	56.9	67.2	79.1	83.5	90.8	80.9
25	67.6	77.9	77.3	89.8	113	63.7	70.6	95.2	67.5	91.8	82.7
26	65	88.4	80.9	83.9	110	62.6	71.9	113	76.2	90.3	75.1
27	71.7	90.2	84.9	94.3	117	55.7	83.3	90.9	68.7	83.2	69
28	93	82.4	92.5	81.3	115	55.7	86.8	98.1	80.4	84.4	64.4
29	84.2	83.9	93.7	102	117	62.4	76.7	54.6	73.5	78.4	73.9
30	87.5	87.7	90.2	100	122	66.5	68.4	71	72.9	85.8	72.8

## Sheet: GSTNDP+FIP
time points	average intensities of GUV vesicles
1	145	203	264	188	143	171	86.8	123	138	162	129
2	142	207	273	206	155	180	89.1	125	142	164	138
3	163	206	279	208	164	188	91.8	131	150	168	142
4	167	209	282	217	161	187	100	129	149	168	146
5	165	228	286	226	169	194	103	139	158	168	145
6	174	225	289	227	169	208	108	138	161	164	155
7	168	215	299	238	177	214	111	152	170	172	162
8	186	227	305	240	184	216	124	147	167	173	165
9	179	237	304	242	188	223	144	150	170	181	165
10	174	240	312	241	194	230	134	149	174	185	176
11	174	245	325	243	199	234	144	151	176	185	172
12	170	251	330	247	204	234	146	155	183	190	175
13	179	258	335	246	210	241	148	157	185	195	181
14	196	258	337	248	214	246	150	158	191	207	183
15	195	264	347	249	215	243	155	158	198	215	190
16	191	266	349	254	218	244	162	161	205	227	193
17	193	267	355	257	216	246	160	165	208	222	202
18	199	269	360	259	219	251	164	170	215	229	206
19	200	267	361	263	217	253	172	169	217	230	212
20	202	269	366	263	219	256	176	173	223	235	219
21	204	277	366	265	220	256	176	177	225	243	220
22	209	279	378	267	220	256	180	178	235	252	221
23	208	281	380	268	221	256	189	181	238	262	225
24	209	288	386	273	222	255	195	187	243	274	227
25	209	287	386	273	219	259	193	188	246	277	237
26	210	286	391	271	220	258	203	192	250	289	236
27	209	284	396	274	224	260	201	192	254	293	242
28	215	286	398	283	227	259	206	196	257	301	249
29	223	289	401	281	225	264	211	197	263	306	252

## Sheet: HisNDP+Ub+FIP
time points	average intensities of GUV vesicles
1	86.3428	183.852	136.118	152.762	167.302	221.054	161.612	196.107	171.935	156.623	183.991
2	92.304	203.417	148.533	177.524	176.338	225.965	188.312	215.57	198.378	174.309	202.843
3	90.5689	200.279	173.22	168.045	181.553	215.87	199.131	219.64	202.836	164.721	208.552
4	102.857	188.102	177.117	192.696	173.149	221.948	210.664	218.036	189.364	161.571	214.505
5	109.077	192.656	186.137	205.84	172.159	223.601	222.164	234.564	201.052	179.402	212.64
6	105.663	212.654	188.684	207.49	181.733	244.777	208.663	242.654	182.041	181.584	208.103
7	98.2423	213.035	188.169	207.451	170.642	223.487	189.338	226.52	196.433	179.336	226.04
8	109.355	210.363	171.303	176.457	166.835	221.638	192.846	236.488	178.992	179.736	218.844
9	107.514	216.523	185.722	184.377	159.339	227.194	188.647	244.806	191.319	188.189	214.362
10	101.129	204.64	188.267	193.992	154.885	222.978	202.61	238.37	183.657	176.389	227.311
11	114.039	204.216	178.372	181.606	154.529	216.476	209.944	236.532	180.264	160.847	232.278
12	103.093	209.804	181.43	190.739	156.343	214.1	231.454	237.93	167.139	167	241.832
13	110.272	216.9	187.144	184.518	146.486	232.393	188.464	232.88	178.202	184.691	241.832
14	105.988	222.686	194.67	210.618	155.52	253.496	236.23	252.701	172.359	203.608	241.975
15	108.826	235.136	185.12	203.081	156.674	273.353	200.028	247.237	176.695	215.942	237.479
16	105.612	244.181	190.611	217.762	152.796	264.377	182.487	249.543	193.782	197.557	225.377
17	115.138	259.063	177.241	206.284	168.756	266.046	197.111	242.348	217.921	188.106	228.045
18	125.489	260.489	191.919	184.384	157.998	264.15	206.035	256.979	204.074	219.812	241.907
19	124.644	271.537	191.237	177.644	171.444	270.275	218.324	264.23	206.339	200.075	240.972
20	117.771	294.345	204.891	175.476	184.578	266.732	201.495	259.287	193.326	195.188	238.27
21	121.239	279.395	206.993	185.236	181.07	263.591	207.551	267.965	163.458	206.558	241.519
22	112.711	289.568	216.605	190.133	193.284	269.025	205.911	242.148	159.144	197.421	246.956
23	116.006	286.956	220.633	209.066	194.161	263.967	206.915	241.17	173.674	232.799	248.262
24	118.052	303.659	206.624	217.96	219.199	276.678	197.423	228.821	178.793	194.651	235.19
25	117.331	316.205	218.822	220.661	227.197	285.129	194.057	258.715	188.106	180.513	251.785
26	130.641	322.307	225.884	217.224	213.969	281.203	190.241	264.255	191.327	178.019	246.104
27	134.922	340.718	231.099	226.598	223.984	284.696	203.467	268.724	218.647	186.32	242.882
28	141.63	345.931	251.846	237.259	236.782	300.615	215.75	283.656	200.007	187.989	254.251
29	146.089	369.979	243.132	243.387	227.093	315.01	215.231	288.793	208.45	206.541	249.896
30	2.72416	1371.26	254.643	237.871	246.993	310.038	220.106	283.382	193.037	186.698	243.037

## Sheet: GSTNDP+Ub+FIP
time points	average intensities of GUV vesicles
1	153	129	128	138	158	159	225	239	111	113
2	167	150	143	200	166	161	292	237	91.7	119
3	172	151	142	202	190	175	278	245	90.5	113
4	179	161	143	221	178	159	276	222	92	127
5	202	165	173	234	174	165	283	224	90.6	141
6	203	173	176	228	185	204	301	285	107	130
7	212	170	203	222	197	215	312	286	111	162
8	222	168	191	232	197	208	318	297	116	137
9	228	196	198	262	202	236	313	390	107	153
10	238	197	185	237	211	204	294	387	102	134
11	241	200	204	235	213	203	307	378	114	134
12	243	225	190	234	202	189	307	395	126	135
13	254	225	199	240	253	222	319	332	105	139
14	251	216	196	237	247	234	327	356	104	140
15	258	221	194	244	254	251	325	338	107	144
16	272	239	205	239	275	279	322	357	104	143
17	282	235	210	241	293	279	325	408	99.7	157
18	265	229	206	237	285	303	338	345	105	145
19	285	242	195	236	295	277	333	341	107	141
20	292	257	232	247	300	298	321	356	154	145
21	296	251	226	261	297	310	315	381	117	145
22	301	239	233	271	294	316	315	367	118	151
23	304	235	231	278	291	304	331	355	118	152
24	292	246	232	273	302	315	325	353	108	160
25	301	253	219	313	310	307	320	370	107	166
26	306	264	231	297	321	296	351	378	112	173
27	306	270	229	290	328	305	340	355	133	167
28	317	277	235	295	328	322	360	350	161	169
29	320	266	240	298	329	314	334	366	193	170
30	324	272	234	306	318	316	369	345	182	166

## Sheet: ULK1c
time points	average intensities of GUV vesicles
1	18.5	12.7	6.02	12.9	20.5	13.3	13.4
2	13.3	6.8	6.91	11.9	16	11.8	16.2
3	16.5	7.46	7.13	11.9	18	9.21	12.9
4	12.7	9.26	8.77	11.5	19.6	14.8	10.5
5	10.2	9.43	8.84	11.1	19	15.9	12.5
6	11	7.12	6.97	8.97	21.6	9.26	14
7	9.78	6.09	8.75	9.07	25.2	8.32	10.9
8	9.7	5.85	9.33	8.37	23.8	6.29	11.1
9	9.6	15.2	10.8	8.72	17.2	4.36	16
10	11.9	11.2	10.8	8.28	-2.9	7.35	14.6
11	7.66	13.7	11.2	9.96	3.3	13.1	15.9
12	4.34	9.69	10	6.54	5.27	12.9	14.8
13	6.83	13.6	10.5	8.14	4.8	8.51	14.5
14	12.5	25	12	8.37	6.17	8.34	16.1
15	13.8	41.5	12.4	6.93	2.47	10.6	15
16	13.5	56.7	13	8.89	2.66	8.1	17.1
17	12	41.1	12.9	7.45	1.45	7.29	15.7
18	7.75	50.2	14.2	7.75	0.483	7.65	15.8
19	7.5	47.8	13.8	6.89	-1.71	8.31	15.2
20	7.42	50.1	12	7.34	-3.63	4.74	12.5
21	7.48	41.8	13.1	12.4	-2.22	7.31	10.9
22	6.43	42.7	12.2	8.39	-3.06	8.45	15.8
23	3.35	46.7	11.8	7.55	-4.95	10.4	12.1
24	4.16	51.4	10.1	7.99	-3.89	6.73	10.8
25	6.47	41.7	13	12.5	-4.25	9.9	10.2
26	7.51	41.1	13.5	9.51	-4.67	7.16	11.9
27	7.4	51	11.6	3.72	-2.53	10.8	12
28	9.79	43.1	12.2	7.27	-4.72	9.99	13.2
29	7.71	41.1	12.5	7.58	-2.87	12.4	15.5

## Sheet: HisNDP+Ub+ULK1c
time points	average intensities of GUV vesicles
1	111	114	102	73.3	97.9	70.1	96.8	139	99.7	82.5	68.7
2	117	108	108	89	85.6	65.7	110	115	94	83.2	72.4
3	115	113	119	79.2	90.3	71.6	91.5	70.7	99.7	88.9	82.5
4	109	102	110	92.3	90.2	65.6	99.5	109	96.2	100	73.2
5	92.4	106	105	86.5	105	69.4	106	135	101	85.7	77
6	93.9	89.8	101	82.2	102	85	116	120	91.9	75.5	68.4
7	83.9	89.2	108	92.6	106	63.6	94.7	87.1	105	90.1	69.7
8	86	107	97.8	83.5	113	79	94.5	111	82.3	90.2	70.1
9	75.1	87.8	96.8	106	106	71.8	87.5	92.5	90.7	91.1	64.2
10	68.6	97.2	93.8	81	112	71.4	90.1	73.3	97.5	76.2	67.6
11	68.3	81.6	116	82	111	64	75.1	54.9	95.3	70.3	65.2
12	84.6	81.2	105	91.8	106	62.2	101	78.9	91.7	82.9	64
13	59	77.9	103	96.5	114	80.4	95.3	69.3	89	81.9	70.2
14	68.2	88.1	114	82.5	122	70.4	84.2	90	93	81.8	72.6
15	69.7	68.7	97.3	92.8	112	66	99.1	126	79.2	82.3	76.5
16	95.3	77.3	89.2	88.7	114	63.1	77.4	97.4	85.2	81.7	65
17	89.2	67.7	108	103	120	63.3	83.9	60.6	74.3	84.8	71
18	75.5	76.3	87.2	99.2	112	59	75.3	91.1	76.2	78.2	68.3
19	95	84	88.6	90.9	108	60.9	90.6	96	70.4	83.2	65.6
20	74.9	80.9	91.8	86.4	97.8	68.2	75.2	58.8	72.2	75.4	71.3
21	82.3	94.1	95.5	84.3	102	66.2	88.7	86.3	76.9	76.2	72.5
22	83.7	93.7	87.9	75.4	114	60.6	82.5	82.4	65.6	90.1	77.6
23	71.4	82	81	86.2	117	59.8	68.4	90.4	80.4	82.4	81.7
24	83.7	77.1	74.1	92.4	107	56.9	67.2	79.1	83.5	90.8	80.9
25	67.6	77.9	77.3	89.8	113	63.7	70.6	95.2	67.5	91.8	82.7
26	65	88.4	80.9	83.9	110	62.6	71.9	113	76.2	90.3	75.1
27	71.7	90.2	84.9	94.3	117	55.7	83.3	90.9	68.7	83.2	69
28	93	82.4	92.5	81.3	115	55.7	86.8	98.1	80.4	84.4	64.4
29	84.2	83.9	93.7	102	117	62.4	76.7	54.6	73.5	78.4	73.9

## Sheet: GSTNDP+Ub+ULK1c
time points	average intensities of GUV vesicles
1	145	203	264	188	143	171	86.8	123	138	162	129
2	142	207	273	206	155	180	89.1	125	142	164	138
3	163	206	279	208	164	188	91.8	131	150	168	142
4	167	209	282	217	161	187	100	129	149	168	146
5	165	228	286	226	169	194	103	139	158	168	145
6	174	225	289	227	169	208	108	138	161	164	155
7	168	215	299	238	177	214	111	152	170	172	162
8	186	227	305	240	184	216	124	147	167	173	165
9	179	237	304	242	188	223	144	150	170	181	165
10	174	240	312	241	194	230	134	149	174	185	176
11	174	245	325	243	199	234	144	151	176	185	172
12	170	251	330	247	204	234	146	155	183	190	175
13	179	258	335	246	210	241	148	157	185	195	181
14	196	258	337	248	214	246	150	158	191	207	183
15	195	264	347	249	215	243	155	158	198	215	190
16	191	266	349	254	218	244	162	161	205	227	193
17	193	267	355	257	216	246	160	165	208	222	202
18	199	269	360	259	219	251	164	170	215	229	206
19	200	267	361	263	217	253	172	169	217	230	212
20	202	269	366	263	219	256	176	173	223	235	219
21	204	277	366	265	220	256	176	177	225	243	220
22	209	279	378	267	220	256	180	178	235	252	221
23	208	281	380	268	221	256	189	181	238	262	225
24	209	288	386	273	222	255	195	187	243	274	227
25	209	287	386	273	219	259	193	188	246	277	237
26	210	286	391	271	220	258	203	192	250	289	236
27	209	284	396	274	224	260	201	192	254	293	242
28	215	286	398	283	227	259	206	196	257	301	249
29	223	289	401	281	225	264	211	197	263	306	252
