# Supplementary material for: The autophagy adaptor NDP52 and the FIP200 coiled-coil allosterically activate ULK1 complex membrane recruitment
Source: eLife. 2020 Aug 10;9:e59099. doi: 10.7554/eLife.59099 (PMC7447430; doi:10.7554/eLife.59099)
Supplement: Figure 5—source data 1. [file elife-59099-fig5-data1.xlsx]

## Sheet: bead binding
	WT	delta MR	delat NDP
	170.053	335.959	3.6055
	309.84	376.594	2.8985
	229.585	246.756	11.6965
	255.266	235.38	10.1375
	215.623	147.994	4.1935
	233.692	131.315	6.5415
	188.008	244.799	9.7065
	176.502	172.825	7.3895
	328.888	312.485	5.4565
	243.112	289.341	8.3471
	312.199	189.526	7.9012
	287.193	190.337	3.7891
	180.678	330.819	10.7345
	197.458	312.283	3.1023
	297.673	274.59	7.3367
	320.331	190.117	6.3471
	291.876	245.341	8.1632
	234.178	312.098	9.1036
	224.129	278.104	8.4367
	229.357	231.963	7.4375
	246.282	252.431	7.11623
mean	246.282	252.431	7.11623
stev	50.1202	65.673	2.53545

## Sheet: GUV WT
time points	average intensities of GUV vesicles
1	605.06	239.506	562.309	336.78	339.962	378.744	236.587	283.924	376.302	439.005	401.463	237.14	355.568	461.546
2	608.136	217.725	603.443	397.305	328.934	457.966	280.156	402.755	342.919	470.817	417.343	249.274	276.222	466.556
3	626.01	224.142	744.524	322.367	481.715	557.617	378.496	487.607	305.6	581.073	431.798	301.696	432.611	475.326
4	613.838	394.631	571.039	381.296	631.733	459.366	540.487	461.24	312.613	440.074	476.662	373.289	399.522	523.055
5	644.472	347.504	441.505	354.705	613.366	580.769	436.55	514.321	364.37	504.433	525.115	284.977	334.123	591.409
6	726.46	366.944	592.98	374.416	376.052	540.879	356.148	460.772	452.21	511.883	490.671	372.945	433.215	631.577
7	671.109	440.126	609.902	386.265	588.775	535.661	307.741	529.354	503.118	498.804	591.589	360.114	407.293	637.995
8	731.422	499.286	613.326	345.509	381.075	616.213	504.199	468.611	545.242	518.07	468.404	325.733	582.195	696.459
9	722.871	417.282	556.814	353.725	450.905	533.064	399.526	417.973	561.95	441.99	450.522	492.586	546.306	625.984
10	702.455	348.201	529.495	415.225	533.921	601.865	541.206	540.03	408.785	589.539	516.765	374.797	558.564	665.777
11	785.631	333.19	576.095	433.815	698.196	619.933	641.736	538.286	404.32	622.706	461.535	498.219	423.491	675.273
12	812.042	380.952	659.468	391.496	886.58	681.802	722.218	579.299	427.85	609.245	604.457	455.521	529.157	672.392
13	808.917	339.189	627.772	373.385	874.443	605.789	584.575	680.015	382.046	735.131	603.548	491.431	674.923	658.33
14	850.179	331.033	601.978	373.785	909.239	625.141	644.7	576.382	341.146	645.564	598.509	395.313	460.677	749.997
15	866.736	384.832	831.178	400.531	911.185	722.099	1014.64	542.561	412.164	681.885	536.547	538.636	537.87	728.748
16	902.369	414.473	850.024	417.222	897.297	587.548	1030.56	599.508	410.566	651.773	571.081	727.175	658.591	676.91
17	925.401	367.596	727.099	426.077	883.571	774.373	676.893	480.175	498.182	712.312	638.353	586.72	454.263	707.672
18	897.449	320.496	799.147	353.689	824.95	889.651	1033.65	690.741	607.247	721.133	618.488	752.861	454.046	682.194
19	911.245	322.731	688.117	433.387	819.021	762.084	683.404	840.936	430.634	751.542	481.247	603.137	671.493	761.301
20	902.606	334.804	741.764	372.39	747.255	778.017	920.083	802.055	500.706	736.231	610.33	495.535	599.547	729.148
21	923.709	373.697	697.946	453.024	783.683	688.276	1057.39	702.874	512.504	591.514	546.384	536.337	708.409	719.859
22	923.671	367.322	780.72	451.318	768.86	806.003	1015.42	757.83	558.873	555.428	661.177	486.396	638.022	674.131
23	1015.8	410.017	797.047	402.753	840.79	914.002	1232.85	671.562	673.848	638.585	592.413	465.964	611.954	702.41
24	981.235	450.405	766.042	368.528	781.073	868.802	972.764	822.17	715.174	781.022	693.991	443.339	667.311	746.848

## Sheet: GUV delta MR
time points	average intensities of GUV vesicles
1	90.7	156	154	92.6	86.3	113	199	185	200	133	239	166	186
2	95.1	216	139	83.6	132	165	178	193	145	88.8	167	238	205
3	153	235	152	45.9	150	189	215	114	172	139	153	195	176
4	160	228	134	66.8	153	171	215	228	133	91.8	179	239	275
5	143	202	138	71.4	141	203	268	331	98.4	88	159	186	233
6	138	233	156	64.6	159	201	247	227	147	126	226	201	198
7	117	289	142	74.6	223	114	305	186	143	105	207	230	242
8	153	266	113	73.5	232	164	288	221	220	189	187	271	186
9	135	261	147	62	218	168	289	284	124	101	162	285	250
10	147	244	167	94.5	254	163	268	294	110	154	266	318	209
11	150	253	124	79.2	282	158	309	286	281	183	267	340	146
12	145	279	110	142	292	194	252	272	241	204	237	276	215
13	166	293	139	112	243	177	255	337	198	142	243	263	367
14	141	277	311	76.2	191	224	247	376	218	108	326	285	295
15	178	231	158	105	267	321	287	383	218	127	241	301	226
16	179	246	178	112	244	324	318	268	317	164	356	358	173
17	153	245	224	97	317	372	230	272	161	147	289	382	368
18	171	251	165	86.8	260	399	290	268	182	219	386	325	288
19	189	287	265	152	221	406	250	219	191	188	235	321	220
20	175	315	218	144	262	375	323	226	190	269	384	309	333
21	174	260	269	136	212	268	295	228	170	221	418	304	275
22	190	216	182	153	255	265	323	240	154	172	307	308	327
23	163	273	224	242	333	205	314	230	146	305	323	316	339

## Sheet: GUV delta NDP
time points	average intensities of GUV vesicles
1	1.05	5.49	6.15	8.85	6.14	6.56	8.49	13	14.8	9.11	3.17	9.55	5.6	10.2
2	0.166	4.6	5.22	10.2	5.9	7.77	7.29	15.1	12.3	10.3	3.77	9.76	3.95	10.5
3	2.45	6.21	6.12	7.2	6.15	7.59	8.99	15.3	12.6	7.85	3.33	7.72	5.52	9.69
4	0.948	6.47	6.01	7.22	5.76	7.74	11.2	17.4	12.2	8.43	3.01	7.03	5.35	10.5
5	0.672	4.76	6.14	6.95	6.22	7.95	13.4	15.9	11.9	8.85	4.15	10.4	4.77	10.3
6	1.64	8.65	6.78	9.01	7.36	8.1	11.6	17.1	11.8	10.6	3.57	9.59	4.03	11.5
7	1.52	14.8	6.54	8.39	7.65	7.93	13.5	14.3	8.65	8.16	4.05	12.6	5.57	10.9
8	2.79	6.56	8.36	8.94	6.98	8.58	14.3	16.9	12.9	8.42	4.34	12.1	5.78	10.4
9	1.87	5.67	8.88	8.21	8.44	9.13	12.5	11.3	9.83	9.64	4.16	13.2	2.84	10.6
10	2.81	6.38	8.22	11.3	7.04	9.97	12.3	15.4	10.4	11.6	6.34	12.9	6.27	9.32
11	3.57	3.86	7.94	9.95	8.11	8.29	14.8	13.1	9.74	9.29	5.12	13.4	4.57	10.2
12	1.15	6.18	9.05	9.91	7.75	6.9	15.3	13.4	9.01	9.75	6.24	15.1	4.58	9.27
13	0.83	6.68	10.8	11.8	8.95	9.03	14.3	11.6	9.66	11.3	5.67	15.1	5.27	8.71
14	1.86	6.09	8.39	9.4	8.62	8.63	15.1	14.9	18.6	12.9	7.13	16.2	5.73	8.79
15	3.9	6.86	7.65	11	7.59	10.6	14.4	12.2	14.5	12.5	6.45	14.5	7.79	9.83
16	4.24	7.63	7.16	8.77	8.09	9.19	18.5	15.9	9.62	40	5.81	20.1	6.69	11.1
17	2.45	7.63	7.14	13.8	8.97	11.5	19.3	16.8	8.31	15.2	8.22	17.1	7.06	11.6
18	3.04	8.46	7.89	9.02	10.3	9.88	17.2	17.5	10	28.5	7.49	17.5	7.29	12.2
19	6.13	7.52	8.59	10.3	9.04	11.4	14.3	23.6	13.2	9.6	8.91	17.5	9.01	12.3
20	3.52	8.62	9.33	9.83	8.17	9.32	14.1	17.6	14	13.9	7.89	25.5	36.7	12.8
21	2.54	9.77	7.56	8.98	9.36	9.51	13.2	16.7	13.5	9.48	7.96	18.9	18	13.2
22	4.27	7.29	8	10.3	9.73	11.2	13.6	14.2	13.8	11.9	6.96	19.1	6.61	13.4
23	2.76	9.52	7.73	9.89	7.75	9.31	13.4	12.3	17.4	11.1	6.61	15.5	38.2	13.5
24	3.64	9.37	7.99	13.6	8.82	8.16	13.9	13.6	9.97	12	9.22	16.3	41.5	14.4
