# Supplementary material for: The autophagy adaptor NDP52 and the FIP200 coiled-coil allosterically activate ULK1 complex membrane recruitment
Source: eLife. 2020 Aug 10;9:e59099. doi: 10.7554/eLife.59099 (PMC7447430; doi:10.7554/eLife.59099)
Supplement: Supplementary file 1. — Statistics of HDX differences for Figure 2D The peptides covering residue 800–1250 of FIP200 are listed, and the number of repeat and the sequence of each peptides are provided. The statistical test of HDX differences employed is paired T-test. P value less than 0.05 is highlighted in red, representing significant difference between ULK1 complex and ULK1 complex with NDP52 samples. [file elife-59099-supp1.xlsx]

## Sheet: Sheet1
Peptide		P value	N	Statistical test employed
799-810	ERCRVVAQDSHF	0.0244371	3	paired T-test
842-855	VEIRNIIEKVKCSL	0.325461	3	paired T-test
869-881	SLKNEYEGKLDGL	0.193696	3	paired T-test
882-901	IKETEENENKIKKLKGELVC	0.00562057	3	paired T-test
903-912	EEVLQNKDNE	0.234525	3	paired T-test
913-923	FALVKHEKEAV	0.467561	3	paired T-test
913-925	FALVKHEKEAVIC	0.141097	3	paired T-test
914-923	ALVKHEKEAV	0.153489	3	paired T-test
924-934	ICLQNEKDQKL	0.0869778	3	paired T-test
924-936	ICLQNEKDQKLLE	0.131291	3	paired T-test
926-934	LQNEKDQKL	0.159022	3	paired T-test
937-947	MENIMHSQNCE	0.0399388	3	paired T-test
938-947	ENIMHSQNCE	0.044516	3	paired T-test
947-956	EIKELKQSRE	0.0122639	3	paired T-test
948-956	IKELKQSRE	2.2482e-05	6	paired T-test
957-970	IVLEDLKKLHVEND	0.000574306	6	paired T-test
957-975	IVLEDLKKLHVENDEKLQL	0.000479517	9	paired T-test
960-975	EDLKKLHVENDEKLQL	0.0234202	6	paired T-test
976-980	LRAEL	0.0365632	3	paired T-test
981-988	QSLEQSHL	0.214343	3	paired T-test
981-990	QSLEQSHLKE	0.0583106	3	paired T-test
989-995	KELEDTL	0.00149401	3	paired T-test
996-1002	QVRHIQE	0.313545	3	paired T-test
996-1003	QVRHIQEF	0.29122	3	paired T-test
1003-1014	FEKVMTDHRVSL	0.00122547	6	paired T-test
1003-1016	FEKVMTDHRVSLEE	0.00279385	6	paired T-test
1004-1014	EKVMTDHRVSL	0.047094	3	paired T-test
1015-1027	EELKKENQQIINQ	0.00073512	3	paired T-test
1028-1045	IQESHAEIIQEKEKQLQE	4.46171e-05	6	paired T-test
1034-1045	EIIQEKEKQLQE	0.0160181	3	paired T-test
1046-1053	LKLKVSDL	0.179382	3	paired T-test
1049-1060	KVSDLSDTRCKL	0.00392725	6	paired T-test
1054-1060	SDTRCKL	0.0913018	3	paired T-test
1064-1073	LALKEAETDE	0.00837552	3	paired T-test
1074-1080	IKILLEE	0.110468	3	paired T-test
1078-1093	LEESRAQQKETLKSLL	0.507987	3	paired T-test
1101-1107	RTEISKL	0.00884654	3	paired T-test
1101-1116	RTEISKLNQKIQDNNE	0.0528529	3	paired T-test
1140-1148	LISRHEEES	0.192343	3	paired T-test
1140-1151	LISRHEEESNIL	0.113407	3	paired T-test
1152-1167	KAELNKVTSLHNQAFE	0.958809	3	paired T-test
1156-1166	NKVTSLHNQAF	0.252722	3	paired T-test
1156-1167	NKVTSLHNQAFE	0.244279	3	paired T-test
1166-1179	FEIEKNLKEQIIEL	0.03205	3	paired T-test
1191-1205	ERQKDEKITQQEEKY	0.126819	3	paired T-test
1191-1212	ERQKDEKITQQEEKYEAIIQNL	0.0150704	3	paired T-test
1213-1230	EKDRQKLVSSQEQDREQL	0.00659138	3	paired T-test
1231-1236	IQKLNC	0.383504	3	paired T-test
1237-1248	EKDEAIQTALKE	0.178496	3	paired T-test
