# Supplementary material for: The autophagy adaptor NDP52 and the FIP200 coiled-coil allosterically activate ULK1 complex membrane recruitment
Source: eLife. 2020 Aug 10;9:e59099. doi: 10.7554/eLife.59099 (PMC7447430; doi:10.7554/eLife.59099)
Supplement: Supplementary file 2. [file elife-59099-supp2.xlsx]

## Sheet: HDX summary(ULK1c-+NDP52)
	ULK1				ATG13
Data Set	ULK1c	ULK1c+NDP52		Data Set	ULK1c	ULK1c+NDP52
HDX reaction details	20 mM HEPES pH 8.0, 200mM NaCl, 1mM Maltose, 1mM TCEP, 30 °C	20 mM HEPES pH 8.0, 200mM NaCl, 1mM Maltose, 1mM TCEP, 30 °C		HDX reaction details	20 mM HEPES pH 8.0, 200mM NaCl, 1mM Maltose, 1mM TCEP, 30 °C	20 mM HEPES pH 8.0, 200mM NaCl, 1mM Maltose, 1mM TCEP, 30 °C
HDX time course (s)	6, 60, 600	6, 60, 600		HDX time course (s)	6, 60, 600	6, 60, 600
HDX control samples	60000s HDX sample			HDX control samples	60000s HDX sample
Back-exchange (mean / IQR)	48.2% / 26.4%			Back-exchange (mean / IQR)	42.3% / 17.2%
# of Peptides	98	98		# of Peptides	65	65
Sequence coverage	0.773	0.773		Sequence coverage	0.845	0.845
Average peptide length / Redundancy	17.3/ 1.6	17.3/ 1.6		Average peptide length / Redundancy	14.9 / 1.9	14.9 / 1.9
Replicates (biological or technical)	3 (technical)	3 (technical)		Replicates (biological or technical)	3 (technical)	3 (technical)
Repeatability	0.096 (average standard deviation)	0.086 (average standard deviation)		Repeatability	0.082 (average standard deviation)	0.074 (average standard deviation)
	ATG101				FIP200
Data Set	ULK1c	ULK1c+NDP52		Data Set	ULK1c	ULK1c+NDP52
HDX reaction details	20 mM HEPES pH 8.0, 200mM NaCl, 1mM Maltose, 1mM TCEP, 30 °C	20 mM HEPES pH 8.0, 200mM NaCl, 1mM Maltose, 1mM TCEP, 30 °C		HDX reaction details	20 mM HEPES pH 8.0, 200mM NaCl, 1mM Maltose, 1mM TCEP, 30 °C	20 mM HEPES pH 8.0, 200mM NaCl, 1mM Maltose, 1mM TCEP, 30 °C
HDX time course (s)	6, 60, 600	6, 60, 600		HDX time course (s)	6, 60, 600	6, 60, 600
HDX control samples	60000s HDX sample			HDX control samples	60000s HDX sample
Back-exchange (mean / IQR)	49.6% / 16.9%			Back-exchange (mean / IQR)	35.8% / 13.4%
# of Peptides	35	35		# of Peptides	278	278
Sequence coverage	0.94	0.94		Sequence coverage	0.908	0.908
Average peptide length / Redundancy	15.5 / 2.5	15.5 / 2.5		Average peptide length / Redundancy	15.2 / 2.7	15.2 / 2.7
Replicates (biological or technical)	3 (technical)	3 (technical)		Replicates (biological or technical)	3 (technical)	3 (technical)
Repeatability	0.082 (average standard deviation)	0.081 (average standard deviation)		Repeatability	0.072 (average standard deviation)	0.065 (average standard deviation)

## Sheet: uptake summary(ULK1c-+NDP52)
ULK1							6s						6s						6s						60s						60s						60s						600s						600s
State	Start	End	Sequence	Search RT	Charge	Max D	Start RT	End RT	#D	%D	Score	Conf	Start RT	End RT	#D	%D	Score	Conf	Start RT	End RT	#D	%D	Score	Conf	Start RT	End RT	#D	%D	Score	Conf	Start RT	End RT	#D	%D	Score	Conf	Start RT	End RT	#D	%D	Score	Conf	Start RT	End RT	#D	%D	Score	Conf	Start RT
ULK1c	15	27	EFSRKDLIGHGAF	23.5	2	11	23.47	23.63	3.425	31.136	0.8594	High	23.44	23.48	3.18	28.91	0.8511	High	23.22	23.61	3.269	29.721	0.9105	High	23.13	23.49	4.207	38.244	0.9112	High	23.09	23.45	4.486	40.781	0.8634	High	23.08	23.44	4.488	40.797	0.8864	High							22.94
ULK1c	15	27	EFSRKDLIGHGAF	23.5	3	11							23.3	23.36	3.347	30.423	0.7575	High	23.28	23.61	3.343	30.393	0.9205	High	23.33	23.38	4.431	40.279	0.8849	High	23.04	23.4	4.813	43.755	0.8862	High	23.12	23.42	4.547	41.335	0.8775	High							22.96
ULK1c	17	27	SRKDLIGHGAF	20.81	2	9	21.06	21.17	2.19	24.339	0.8869	High	20.62	21.02	2.052	22.794	0.9103	High	20.59	21.11	2.184	24.262	0.913	High	20.43	20.69	2.795	31.051	0.8794	High	20.42	20.8	3.047	33.854	0.8963	High	20.43	20.89	2.973	33.03	0.9007	High	20.45	20.92	3.379	37.548	0.8644	High	20.3
ULK1c	17	27	SRKDLIGHGAF	20.81	3	9	21.02	21.25	2.093	23.258	0.8584	High	20.62	21.02	2.001	22.236	0.8615	High	20.64	21.03	2.043	22.702	0.8781	High	20.48	20.69	2.833	31.482	0.8762	High	20.66	20.84	3.101	34.451	0.8582	High	20.39	20.88	3.047	33.861	0.8555	High							20.31
ULK1c	28	42	AVVFKGRHREKHDLE	17.68	2	13	17.48	17.77	0.743	5.712	0.9277	High	17.5	17.72	0.625	4.806	0.9272	High	17.5	17.9	0.626	4.813	0.9223	High	17.35	17.62	1.261	9.7	0.9292	High	17.08	17.55	1.183	9.099	0.8857	High	17.12	17.55	1.234	9.494	0.9305	High	17.23	17.58	2.046	15.74	0.8914	High	17.03
ULK1c	28	42	AVVFKGRHREKHDLE	17.68	3	13	17.5	17.94	0.863	6.637	0.946	High	17.48	17.85	0.741	5.697	0.9504	High	17.44	17.82	0.855	6.577	0.9424	High	17.31	17.81	1.42	10.919	0.9363	High	17.13	17.61	1.492	11.479	0.9115	High	17.19	17.63	1.447	11.13	0.9238	High	17.19	17.71	2.381	18.313	0.9214	High	17.01
ULK1c	28	42	AVVFKGRHREKHDLE	17.68	4	13	17.46	17.95	0.865	6.656	0.8404	High	17.35	17.94	0.736	5.662	0.8861	High	17.48	17.95	0.844	6.493	0.912	High	17.36	17.71	1.354	10.415	0.8199	High	17.22	17.58	1.573	12.097	0.895	High	17.17	17.63	1.487	11.44	0.8624	High	17.28	17.66	2.491	19.159	0.8947	High	17.08
ULK1c	28	43	AVVFKGRHREKHDLEV	20.27	2	14	19.83	20.19	0.779	5.564	0.9399	High	19.8	20.2	0.723	5.162	0.8983	High	19.73	20.23	0.695	4.963	0.9444	High	19.68	20.16	1.567	11.192	0.9137	High	19.58	19.95	1.492	10.658	0.9068	High	19.63	19.92	1.457	10.41	0.9133	High	19.59	20.09	2.747	19.623	0.9005	High	19.45
ULK1c	28	43	AVVFKGRHREKHDLEV	20.27	3	14	19.78	20.25	0.911	6.505	0.8935	High	19.82	20.1	0.875	6.25	0.8964	High	19.75	20.28	0.87	6.215	0.9006	High	19.7	20.13	1.701	12.151	0.889	High	19.59	19.96	1.695	12.109	0.8925	High	19.57	19.96	1.698	12.126	0.8893	High	19.63	20	2.919	20.851	0.8747	High	19.5
ULK1c	28	43	AVVFKGRHREKHDLEV	20.27	4	14	19.84	20.18	0.801	5.725	0.9304	High	19.77	20.42	0.773	5.52	0.9055	High	19.77	20.41	0.86	6.141	0.8595	High	19.72	20.1	1.767	12.622	0.8437	High	19.54	19.95	1.692	12.084	0.9143	High	19.58	19.95	1.988	14.203	0.8642	High	19.61	20.01	3.011	21.506	0.8231	High	19.51
ULK1c	28	78	AVVFKGRHREKHDLEVAVKCINKKNLAKSQTLLGKEIKILKELKHENIVAL	31.05	5	49	30.13	30.2	11.793	24.068	0.7432	High	30.06	30.63	11.124	22.703	0.8299	High	30.06	30.63	11.727	23.932	0.8714	High	30.06	30.63	15.181	30.981	0.7697	High	29.83	30.34	15.165	30.95	0.8246	High	29.87	30.18	15.033	30.68	0.7998	High	29.89	30.19	20.657	42.158	0.4719	High	29.8
ULK1c	29	44	VVFKGRHREKHDLEVA	19.13	3	14	19.78	20.26	0.892	6.373	0.8938	High	19.88	20.04	0.884	6.315	0.8941	High	19.95	20.23	0.854	6.098	0.9186	High	19.81	20.01	1.708	12.197	0.8856	High	19.56	19.91	1.701	12.15	0.8874	High	19.6	19.93	1.686	12.046	0.8903	High	19.63	19.92	2.934	20.956	0.8763	High	19.45
ULK1c	43	59	VAVKCINKKNLAKSQTL	19.91	3	15	18.48	18.78	7.974	53.159	0.817	High	18.53	18.8	7.768	51.787	0.8163	High	18.52	18.84	7.845	52.302	0.8713	High	18.4	18.7	8.083	53.885	0.8736	High	18.33	18.63	8.151	54.341	0.8072	High	18.36	18.63	8.083	53.887	0.7801	High	18.47	18.51	8.392	55.949	0.6573	High	18.32
ULK1c	43	60	VAVKCINKKNLAKSQTLL	22.27	3	16	21.08	21.26	8.174	51.088	0.7166	High	20.92	21.32	8.138	50.865	0.7598	High	20.9	21.24	8.295	51.844	0.8516	High	20.98	21.16	8.903	55.646	0.745	High	20.71	21.08	9.004	56.275	0.8288	High	20.76	21.09	8.975	56.095	0.8462	High	20.74	21.15	8.884	55.524	0.7907	High	20.61
ULK1c	43	78	VAVKCINKKNLAKSQTLLGKEIKILKELKHENIVAL	29.69	4	34	29.69	29.92	11.225	33.014	0.9134	High	29.58	29.93	10.494	30.864	0.8986	High	29.58	29.93	10.847	31.902	0.9231	High	29.55	29.86	13.179	38.761	0.9087	High	29.34	29.68	13.25	38.972	0.9248	High	29.3	29.6	13.399	39.41	0.9153	High	29.3	29.73	17.558	51.64	0.9276	High	29.31
ULK1c	43	78	VAVKCINKKNLAKSQTLLGKEIKILKELKHENIVAL	29.69	5	34							29.58	29.89	10.618	31.229	0.8631	High	29.6	29.89	11.116	32.694	0.9072	High	29.47	29.89	13.376	39.342	0.8532	High	29.38	29.54	13.77	40.499	0.8234	High	29.36	29.62	13.609	40.028	0.8572	High							29.37
ULK1c	44	59	AVKCINKKNLAKSQTL	17.91	3	14	17.8	18.01	7.553	53.952	0.7997	High	17.64	18.05	7.395	52.82	0.8329	High	17.63	17.99	7.597	54.263	0.8575	High	17.6	17.75	8.065	57.608	0.8849	High	17.48	17.65	7.908	56.489	0.8267	High	17.39	17.82	8.013	57.234	0.8195	High	17.66	17.79	8.288	59.2	0.84	High	17.36
ULK1c	44	60	AVKCINKKNLAKSQTLL	20.66	3	15	20.53	20.59	8.165	54.43	0.7175	High	20.53	20.65	8.027	53.516	0.8752	High	20.4	20.68	8.246	54.974	0.8559	High	20.24	20.45	8.573	57.152	0.8457	High	20.16	20.52	8.691	57.939	0.8497	High	20.23	20.47	8.8	58.668	0.8689	High	20.3	20.43	8.932	59.544	0.7982	High	20.13
ULK1c	44	63	AVKCINKKNLAKSQTLLGKE	20.61	3	18	19.71	19.86	9.049	50.271	0.5213	High	19.54	19.89	8.985	49.919	0.7953	High	19.57	19.85	8.983	49.903	0.7379	High	19.44	19.72	9.849	54.715	0.8037	High	19.37	19.7	10.002	55.569	0.8652	High	19.4	19.67	9.926	55.144	0.8614	High	19.63	19.68	10.109	56.16	0.3554	High	19.28
ULK1c	44	77	AVKCINKKNLAKSQTLLGKEIKILKELKHENIVA	29.24	4	32	28.27	28.64	10.886	34.017	0.879	High	28.2	28.64	10.573	33.042	0.8155	High	28.23	28.65	10.731	33.534	0.887	High	28.13	28.57	12.697	39.678	0.8871	High	28.02	28.35	13.158	41.12	0.7723	High	27.98	28.4	12.76	39.876	0.8195	High	28.28	28.37	16.18	50.563	0.6791	High	27.9
ULK1c	44	78	AVKCINKKNLAKSQTLLGKEIKILKELKHENIVAL	29.63	3	33	29.45	29.88	11.12	33.698	0.8985	High	29.47	29.86	10.15	30.759	0.8868	High	29.47	29.86	10.34	31.332	0.9095	High	29.47	29.86	12.698	38.479	0.9152	High	29.17	29.61	12.87	39.001	0.9189	High	29.2	29.86	12.994	39.375	0.8973	High	29.31	29.61	16.87	51.12	0.8796	High	29.22
ULK1c	44	78	AVKCINKKNLAKSQTLLGKEIKILKELKHENIVAL	29.63	4	33	29.45	29.84	11.264	34.133	0.939	High	29.47	29.84	10.512	31.856	0.9244	High	29.54	29.83	10.656	32.291	0.9228	High	29.47	29.84	13.079	39.634	0.905	High	29.34	29.5	13.348	40.449	0.9095	High	29.34	29.51	13.25	40.153	0.9133	High	29.3	29.66	17.244	52.255	0.9357	High	29.31
ULK1c	44	78	AVKCINKKNLAKSQTLLGKEIKILKELKHENIVAL	29.63	5	33	29.5	29.66	11.573	35.07	0.917	High	29.56	29.75	10.546	31.959	0.8633	High	29.5	29.84	10.94	33.152	0.9126	High	29.48	29.77	13.529	40.998	0.8442	High	29.3	29.52	13.723	41.585	0.8646	High	29.28	29.64	13.415	40.651	0.8916	High	29.37	29.63	17.743	53.768	0.8347	High	29.29
ULK1c	60	77	LGKEIKILKELKHENIVA	25.72	3	16	25.55	26.04	2.756	17.227	0.9198	High	25.63	25.93	2.782	17.39	0.8002	High	25.59	25.85	2.641	16.505	0.9184	High	25.54	25.83	4.029	25.183	0.8669	High	25.48	25.65	3.946	24.663	0.912	High	25.52	25.68	4.098	25.61	0.7912	High	25.41	25.87	6.785	42.408	0.7458	High	25.34
ULK1c	60	78	LGKEIKILKELKHENIVAL	26.68	3	17	26.41	26.83	2.722	16.009	0.9204	High	26.51	26.84	2.468	14.516	0.9276	High	26.47	26.8	2.64	15.531	0.9414	High	26.57	26.67	4.023	23.664	0.9192	High	26.25	26.54	4.165	24.502	0.8834	High	26.23	26.69	4.106	24.155	0.8922	High	26.23	26.62	7.301	42.944	0.9134	High	26.12
ULK1c	61	78	GKEIKILKELKHENIVAL	25.75	3	16	25.55	26.04	2.764	17.275	0.9198	High	25.68	25.89	2.75	17.187	0.8065	High	25.62	25.82	2.636	16.475	0.9012	High	25.59	25.91	3.943	24.646	0.8386	High	25.48	25.65	3.954	24.711	0.912	High	25.46	25.78	4.092	25.577	0.7289	High	25.6	25.79	6.746	42.161	0.7075	High	25.34
ULK1c	64	78	IKILKELKHENIVAL	25.27	2	13	25.18	25.48	2.118	16.29	0.9394	High	25.24	25.49	1.988	15.291	0.9438	High	25.23	25.48	2.151	16.543	0.9446	High	25.14	25.49	2.826	21.74	0.9096	High	25.02	25.18	2.871	22.085	0.9203	High	24.89	25.31	2.961	22.78	0.9065	High	25.01	25.2	4.946	38.044	0.8836	High	24.84
ULK1c	64	78	IKILKELKHENIVAL	25.27	3	13	25.13	25.58	2.224	17.105	0.9343	High	25.18	25.5	1.979	15.224	0.9302	High	25.18	25.55	2.174	16.725	0.9214	High	25.03	25.45	2.92	22.459	0.9121	High	25.06	25.23	2.924	22.494	0.9146	High	24.97	25.2	2.992	23.013	0.9278	High	24.91	25.3	5.031	38.699	0.8701	High	24.88
ULK1c	103	117	YLHAMRTLSEDTIRL	27.49	2	13	26.23	26.41	0.708	5.448	0.8591	High	26.22	26.34	0.569	4.379	0.8403	High	26.2	26.41	0.655	5.04	0.8794	High	26.15	26.29	0.626	4.817	0.8584	High	26.08	26.23	0.683	5.251	0.8637	High	26.02	26.21	0.612	4.707	0.8271	High	25.96	26.14	0.899	6.918	0.8164	High	25.96
ULK1c	107	113	MRTLSED	14.62	2	5	14.36	14.66	1.981	39.618	0.8626	High	14.24	14.41	1.906	38.119	0.8489	High	14.23	14.42	1.934	38.683	0.8282	High	14.05	14.39	2.452	49.034	0.8661	High	14.26	14.49	2.478	49.57	0.8525	High	14.25	14.54	2.447	48.94	0.858	High	14.44	14.59	3.215	64.308	0.7442	High	13.88
ULK1c	117	144	LFLQQIAGAMRLLHSKGIIHRDLKPQNI	32.18	4	25	30.29	30.62	1.152	4.606	0.9012	High	30.38	30.55	1.189	4.756	0.8497	High	30.26	30.69	1.343	5.372	0.86	High	30.33	30.67	1.602	6.408	0.8922	High	30.15	30.31	1.548	6.192	0.8841	High	30.16	30.34	1.583	6.33	0.8882	High	30.16	30.45	2.071	8.283	0.9006	High	30.11
ULK1c	118	125	FLQQIAGA	20.89	2	6	19.71	19.86	0.057	0.944	0.8273	High	19.68	19.78	0.067	1.116	0.8728	High	19.5	19.94	0.08	1.339	0.8714	High	19.58	19.75	0.095	1.588	0.8832	High	19.48	19.64	0.091	1.513	0.8644	High	19.54	19.65	0.113	1.89	0.8644	High	19.48	19.64	0.205	3.41	0.8863	High	19.53
ULK1c	118	145	FLQQIAGAMRLLHSKGIIHRDLKPQNIL	30.97	3	25	30.23	30.53	1.134	4.535	0.9189	High	30.24	30.75	1.253	5.011	0.906	High	30.3	30.76	1.25	5.001	0.8823	High	30.29	30.65	1.586	6.345	0.8966	High	29.99	30.42	1.58	6.319	0.8985	High	30.09	30.55	1.585	6.34	0.8966	High	30.12	30.55	2.018	8.074	0.9373	High	29.94
ULK1c	118	145	FLQQIAGAMRLLHSKGIIHRDLKPQNIL	30.97	4	25	30.39	30.62	1.112	4.45	0.9048	High	30.38	30.55	1.179	4.718	0.8497	High	30.44	30.64	1.235	4.941	0.8706	High	30.31	30.67	1.594	6.375	0.89	High	30.15	30.31	1.539	6.154	0.8841	High	30.15	30.31	1.566	6.262	0.8971	High	30.14	30.45	2.052	8.208	0.8963	High	30.11
ULK1c	118	145	FLQQIAGAMRLLHSKGIIHRDLKPQNIL	30.97	5	25	30.25	30.69	1.053	4.21	0.8948	High	30.42	30.78	1.101	4.403	0.8792	High	30.42	30.81	1.075	4.3	0.8836	High	30.29	30.66	1.36	5.439	0.8683	High	30.18	30.49	1.497	5.987	0.873	High	30.15	30.31	1.397	5.589	0.8515	High	30.19	30.67	1.979	7.915	0.9059	High	30.05
ULK1c	126	145	MRLLHSKGIIHRDLKPQNIL	24.21	2	17	24.18	24.25	0.844	4.964	0.9047	High	24.05	24.36	0.793	4.667	0.9205	High	24.17	24.39	0.846	4.976	0.9195	High	24.05	24.32	1.006	5.916	0.9217	High	23.96	24.05	1.02	6.002	0.9182	High	23.89	24.05	0.996	5.86	0.8934	High	23.91	24.13	1.423	8.368	0.8469	High	23.81
ULK1c	126	145	MRLLHSKGIIHRDLKPQNIL	24.21	3	17	24.08	24.33	0.922	5.426	0.954	High	24.11	24.36	0.952	5.598	0.9348	High	24.07	24.42	0.921	5.419	0.9416	High	24.1	24.37	1.131	6.654	0.9376	High	23.9	24.13	1.174	6.908	0.9308	High	23.93	24.15	1.144	6.731	0.9417	High	23.9	24.15	1.514	8.903	0.9374	High	23.8
ULK1c	126	145	MRLLHSKGIIHRDLKPQNIL	24.21	4	17	24.08	24.35	0.856	5.034	0.9383	High	24.13	24.33	0.904	5.315	0.9523	High	24.09	24.37	0.886	5.215	0.9556	High	24.08	24.35	1.091	6.42	0.9401	High	23.94	24.16	1.108	6.518	0.9177	High	23.91	24.14	1.143	6.721	0.9281	High	23.93	24.16	1.49	8.766	0.9467	High	23.83
ULK1c	127	145	RLLHSKGIIHRDLKPQNIL	23.44	3	16	23.17	23.46	0.895	5.593	0.8977	High	23.17	23.45	0.722	4.511	0.869	High	23.3	23.46	0.912	5.699	0.8979	High	23.08	23.37	1.079	6.745	0.9209	High	23.11	23.16	1.053	6.584	0.8716	High	22.97	23.27	1.218	7.612	0.8288	High	23.03	23.23	1.441	9.004	0.9027	High	22.9
ULK1c	129	145	LHSKGIIHRDLKPQNIL	22.4	2	14	22.29	22.62	0.93	6.641	0.9236	High	22.22	22.57	0.79	5.645	0.9028	High	22.29	22.62	0.811	5.792	0.9132	High	22.14	22.43	1.172	8.373	0.9309	High	22.09	22.38	1.104	7.887	0.9057	High	22.14	22.31	1.208	8.63	0.9025	High	22.2	22.31	1.302	9.299	0.9346	High	21.96
ULK1c	129	145	LHSKGIIHRDLKPQNIL	22.4	3	14	22.27	22.54	0.834	5.96	0.9191	High	22.27	22.55	0.842	6.017	0.9434	High	22.25	22.54	0.88	6.283	0.9316	High	22.2	22.48	1.06	7.57	0.921	High	22.06	22.29	1.103	7.879	0.9212	High	22.07	22.28	1.092	7.8	0.914	High	22.11	22.41	1.356	9.685	0.9483	High	21.99
ULK1c	146	158	LSNPAGRRANPNS	12.24	2	9	11.88	12.07	6.367	70.743	0.9106	High	11.59	11.74	6.16	68.447	0.9175	High	11.62	11.93	6.176	68.621	0.906	High	11.46	11.84	6.255	69.497	0.9057	High	11.49	11.87	6.441	71.564	0.9096	High	11.56	11.9	6.393	71.031	0.9084	High	11.85	12.05	6.46	71.783	0.9157	High	11.23
ULK1c	146	158	LSNPAGRRANPNS	12.24	3	9							11.63	11.71	6.166	68.512	0.8959	High	11.57	11.98	6.242	69.35	0.8631	High	11.33	11.79	6.305	70.06	0.9076	High	11.52	11.9	6.457	71.748	0.885	High	11.53	11.91	6.438	71.534	0.8813	High	11.83	12.03	6.445	71.609	0.8909	High	11.37
ULK1c	146	168	LSNPAGRRANPNSIRVKIADFGF	27.56	3	19	27.46	27.79	7.377	38.825	0.8633	High	27.4	27.58	7.202	37.906	0.8814	High	27.46	27.75	7.082	37.274	0.8801	High	27.37	27.48	9.138	48.095	0.8342	High	27.19	27.54	9.229	48.573	0.8818	High	27.31	27.44	9.138	48.094	0.8997	High	27.58	27.68	9.842	51.798	0.7715	High	27.16
ULK1c	146	176	LSNPAGRRANPNSIRVKIADFGFARYLQSNM	30.49	3	27	29.4	29.75	11.269	41.736	0.7332	High	29.52	29.71	11.088	41.065	0.768	High	29.46	29.77	10.998	40.734	0.777	High	29.4	29.67	14.731	54.558	0.7867	High	29.33	29.61	14.8	54.815	0.785	High	29.3	29.55	14.989	55.516	0.7655	High	29.5	29.77	16.561	61.338	0.7089	High	29.17
ULK1c	159	165	IRVKIAD	17.13	2	5	16.88	17.33	0.177	3.531	0.8608	High	16.89	17.32	0.158	3.165	0.8659	High	16.88	17.11	0.124	2.471	0.8401	High	16.76	16.96	0.321	6.417	0.8691	High	16.66	16.95	0.325	6.507	0.8435	High	16.66	16.96	0.306	6.121	0.8511	High	16.68	16.82	0.67	13.394	0.7366	High	16.56
ULK1c	159	167	IRVKIADFG	22.69	2	7	22.47	22.6	0.387	5.526	0.8967	High	22.43	22.79	0.368	5.256	0.8902	High	22.41	22.71	0.359	5.134	0.9027	High	22.3	22.66	1.033	14.762	0.8536	High	22.09	22.61	1.035	14.779	0.8326	High	22.24	22.59	1.097	15.666	0.8599	High	22.15	22.57	1.904	27.195	0.8923	High	22.34
ULK1c	159	168	IRVKIADFGF	27.84	2	8	27.29	27.71	0.596	7.45	0.9124	High	27.28	27.71	0.604	7.545	0.9135	High	27.31	27.66	0.588	7.345	0.8968	High	27.3	27.63	1.565	19.559	0.8902	High	27.12	27.58	1.594	19.926	0.903	High	27.16	27.57	1.59	19.876	0.894	High	27.18	27.54	2.447	30.585	0.9012	High	27.12
ULK1c	169	176	ARYLQSNM	17.83	2	6	17.73	17.88	4.151	69.18	0.8256	High	17.56	17.73	4.131	68.843	0.8551	High	17.55	17.69	4.156	69.259	0.8501	High	17.35	17.51	4.344	72.394	0.8053	High	17.45	17.78	4.372	72.862	0.886	High	17.48	17.8	4.332	72.199	0.8712	High	17.77	17.88	4.278	71.294	0.7419	High	17.31
ULK1c	182	194	CGSPMYMAPEVIM	26.09	2	9	25.84	26.13	1.204	13.379	0.886	High	25.82	26.18	1.204	13.373	0.907	High	25.89	25.99	1.129	12.54	0.8961	High	25.83	26.12	1.617	17.969	0.9128	High	25.92	26.16	1.706	18.958	0.9149	High	25.74	26.13	1.62	17.998	0.8992	High	25.77	26.12	2.248	24.983	0.8687	High	25.74
ULK1c	195	204	SQHYDGKADL	15.89	2	8	15.67	16.23	1.231	15.394	0.8744	High	15.87	15.97	1.266	15.829	0.7794	High	15.89	16.32	1.329	16.608	0.7318	High	15.49	15.8	2.065	25.812	0.9073	High	15.68	15.93	2.02	25.246	0.8443	High	15.58	15.74	1.983	24.794	0.8041	High	15.76	15.95	2.186	27.321	0.7336	High	15.52
ULK1c	197	204	HYDGKADL	15.55	2	6	15.36	15.43	0.977	16.286	0.7622	High	15.48	15.52	0.926	15.441	0.6216	High	15.2	15.44	0.945	15.747	0.741	High	15.1	15.3	1.295	21.587	0.8518	High	15.12	15.38	1.317	21.949	0.8879	High	15.14	15.23	1.322	22.036	0.8002	High	15.32	15.42	1.582	26.37	0.7435	High	14.91
ULK1c	205	213	WSIGTIVYQ	27.35	2	7	26.05	26.25	0.161	2.299	0.8499	High	25.94	26.38	0.142	2.031	0.8465	High	26	26.33	0.102	1.464	0.788	High	26.01	26.24	0.203	2.893	0.8692	High	26.12	26.13	0.126	1.805	0.7751	High	25.99	26.03	0.145	2.074	0.7772	High	25.9	26.07	0.123	1.756	0.8271	High	25.82
ULK1c	205	215	WSIGTIVYQCL	33.31	2	9	33.23	33.43	0.086	0.953	0.8822	High	33.17	33.66	0.116	1.292	0.825	High	33.29	33.46	0.18	2	0.9154	High	33.22	33.4	0.167	1.854	0.9146	High	33.11	33.41	0.26	2.89	0.8872	High	33.38	33.44	0.17	1.886	0.7825	High	33.11	33.3	0.228	2.532	0.7466	High	33.28
ULK1c	213	228	QCLTGKAPFQASSPQD	18.73	2	12	18.51	18.9	4.286	35.713	0.8802	High	18.49	18.82	4.106	34.214	0.8676	High	18.56	18.74	4.165	34.712	0.8813	High	18.46	18.57	5.335	44.457	0.8536	High	18.45	18.63	5.369	44.738	0.8772	High	18.52	18.78	5.468	45.567	0.8924	High	18.62	18.8	5.619	46.825	0.9207	High	18.38
ULK1c	214	228	CLTGKAPFQASSPQD	18.49	2	11	18.19	18.5	3.864	35.13	0.7604	High	18.22	18.38	3.773	34.296	0.8774	High	18.16	18.46	3.845	34.954	0.8573	High	18.06	18.28	4.745	43.135	0.8586	High	18.05	18.16	4.809	43.716	0.8608	High	18.1	18.26	4.858	44.162	0.8818	High	17.96	18.27	5.281	48.013	0.7825	High	18
ULK1c	216	228	TGKAPFQASSPQD	15.27	2	9	15.17	15.49	4.41	49.002	0.9247	High	14.83	14.9	4.363	48.483	0.8647	High	14.74	15.1	4.341	48.235	0.9016	High	14.57	14.81	5.26	58.445	0.9126	High	15.09	15.38	5.23	58.107	0.899	High	15.12	15.39	5.249	58.326	0.9044	High	14.74	15.37	5.282	58.694	0.8497	High	14.81
ULK1c	216	231	TGKAPFQASSPQDLRL	23.31	2	12							23.2	23.28	4.282	35.685	0.7417	High							23.07	23.24	6.88	57.335	0.7718	High	23.05	23.23	6.447	53.726	0.7483	High	23.21	23.32	6.498	54.153	0.6975	High	22.94	23.1	7.378	61.487	0.76	High	22.93
ULK1c	216	231	TGKAPFQASSPQDLRL	23.31	3	12	23.4	23.54	4.363	36.357	0.7833	High	23.2	23.55	4.229	35.244	0.7926	High	23.17	23.53	4.39	36.582	0.7196	High	23.07	23.4	6.516	54.302	0.7003	High	22.93	23.42	6.758	56.318	0.7789	High	23.04	23.36	6.735	56.122	0.7646	High	22.9	23.1	7.873	65.607	0.7925	High	22.92
ULK1c	232	255	FYEKNKTLVPTIPRETSAPLRQLL	26.73	2	19	26.66	26.83	7.532	39.641	0.8959	High	26.39	26.81	6.875	36.184	0.9108	High	26.41	26.79	7.106	37.403	0.9175	High	26.45	26.8	8.339	43.888	0.9099	High	26.26	26.63	8.774	46.18	0.9151	High	26.28	26.59	8.67	45.633	0.8952	High	26.44	26.71	9.45	49.735	0.8872	High	26.16
ULK1c	232	255	FYEKNKTLVPTIPRETSAPLRQLL	26.73	3	19	26.38	26.75	7.781	40.95	0.9076	High	26.31	26.86	7.079	37.258	0.898	High	26.41	26.74	7.256	38.19	0.9014	High	26.36	26.74	8.533	44.908	0.9087	High	26.24	26.62	8.985	47.292	0.9068	High	26.25	26.6	8.932	47.011	0.9106	High	26.24	26.54	10.039	52.835	0.9056	High	26.22
ULK1c	232	255	FYEKNKTLVPTIPRETSAPLRQLL	26.73	4	19	26.38	26.75	7.952	41.852	0.9102	High	26.34	26.84	7.199	37.89	0.9076	High	26.38	26.85	7.356	38.716	0.9096	High	26.26	26.85	8.704	45.808	0.9174	High	26.25	26.56	9.217	48.512	0.9117	High	26.25	26.58	9.135	48.078	0.9002	High	26.24	26.58	10.302	54.22	0.9118	High	26.17
ULK1c	232	255	FYEKNKTLVPTIPRETSAPLRQLL	26.73	5	19	26.5	26.7	7.636	40.191	0.8037	High	26.45	26.76	6.68	35.158	0.7936	High	26.35	26.74	7.153	37.648	0.8878	High	26.48	26.73	8.159	42.945	0.8265	High	26.3	26.5	8.837	46.512	0.8	High	26.36	26.56	9.053	47.649	0.877	High	26.31	26.53	9.867	51.929	0.7773	High	26.2
ULK1c	232	256	FYEKNKTLVPTIPRETSAPLRQLLL	28.67	3	20	28.1	28.44	7.96	39.802	0.905	High	28.11	28.44	7.398	36.991	0.8977	High	28.04	28.44	7.574	37.868	0.9096	High	28.03	28.21	8.914	44.572	0.8886	High	27.91	28.19	9.232	46.158	0.8947	High	27.91	28.24	9.328	46.639	0.8838	High	27.88	28.09	10.204	51.02	0.8586	High	27.87
ULK1c	232	256	FYEKNKTLVPTIPRETSAPLRQLLL	28.67	4	20	28.11	28.41	7.628	38.141	0.745	High	28.06	28.5	7.433	37.167	0.773	High	28.12	28.45	7.408	37.04	0.8092	High	28.12	28.35	9.016	45.08	0.7155	High	27.98	28.23	9.3	46.5	0.7901	High	27.9	28.07	9.536	47.68	0.8351	High	27.97	28.19	10.125	50.625	0.6751	High	27.87
ULK1c	256	269	LALLQRNHKDRMDF	25.24	3	12	23.96	24.26	2.072	17.265	0.882	High	23.93	24.01	1.919	15.994	0.6894	High	23.9	23.98	1.965	16.374	0.6691	High	23.92	23.95	2.437	20.311	0.8118	High	23.75	23.94	2.451	20.428	0.8151	High	23.81	23.85	2.399	19.994	0.7885	High	23.73	23.88	2.409	20.072	0.8571	High	23.6
ULK1c	256	271	LALLQRNHKDRMDFDE	23.15	3	14	23.06	23.12	2.02	14.431	0.4634	High	22.65	23.16	1.982	14.154	0.9008	High	23.05	23.2	2.027	14.48	0.8934	High	22.95	22.96	2.62	18.712	0.7065	High	22.69	22.88	2.78	19.858	0.7198	High	22.84	22.94	2.814	20.098	0.7439	High	22.74	22.93	3.171	22.651	0.746	High	22.62
ULK1c	256	272	LALLQRNHKDRMDFDEF	26.46	3	15	26.32	26.5	2.578	17.186	0.88	High	26.3	26.38	2.488	16.584	0.6973	High	26.36	26.48	2.403	16.02	0.7864	High	26.45	26.62	3.032	20.212	0.6985	High	26.18	26.44	3.196	21.309	0.838	High	26.15	26.36	2.978	19.854	0.8815	High	26.27	26.34	3.251	21.671	0.5511	High	26.1
ULK1c	257	269	ALLQRNHKDRMDF	22.04	3	11	21.82	21.96	1.654	15.039	0.7732	High	21.88	22.11	1.48	13.457	0.8268	High	21.89	22.13	1.582	14.377	0.8854	High	21.75	22.1	1.885	17.133	0.8675	High	21.72	21.84	1.948	17.71	0.865	High	21.6	21.73	1.952	17.744	0.8107	High	21.74	21.89	2.341	21.281	0.8049	High	21.5
ULK1c	259	269	LQRNHKDRMDF	19.48	2	9	19.33	19.68	1.577	17.526	0.9174	High	19.29	19.66	1.397	15.52	0.9378	High	19.26	19.67	1.481	16.459	0.9311	High	19.16	19.53	1.624	18.043	0.9453	High	19.06	19.45	1.7	18.893	0.9357	High	19.09	19.38	1.733	19.259	0.9271	High	19.14	19.5	2.037	22.635	0.9298	High	18.95
ULK1c	259	269	LQRNHKDRMDF	19.48	3	9	19.39	19.7	1.547	17.187	0.9165	High	19.26	19.66	1.309	14.549	0.9184	High	19.37	19.63	1.426	15.849	0.9195	High	19.34	19.41	1.606	17.849	0.9093	High	19.23	19.39	1.646	18.294	0.9206	High	19.22	19.39	1.652	18.356	0.9346	High	19.25	19.42	2.027	22.52	0.9215	High	19.01
ULK1c	259	271	LQRNHKDRMDFDE	18.94	2	11	18.83	18.95	1.884	17.13	0.7147	High	18.64	18.75	1.729	15.721	0.8139	High	18.56	18.71	1.905	17.318	0.8393	High	18.52	18.7	2.338	21.251	0.8636	High	18.42	18.71	2.253	20.482	0.8684	High	18.49	18.73	2.222	20.196	0.8641	High	18.46	18.59	2.415	21.951	0.8866	High	18.32
ULK1c	259	271	LQRNHKDRMDFDE	18.94	3	11	18.72	18.96	2.037	18.517	0.8932	High	18.57	18.88	1.68	15.277	0.8716	High	18.62	18.88	1.777	16.154	0.9097	High	18.43	18.56	2.046	18.604	0.8971	High	18.37	18.72	2.196	19.961	0.8811	High	18.51	18.67	2.158	19.614	0.8945	High	18.43	18.72	2.473	22.483	0.7453	High	18.23
ULK1c	259	272	LQRNHKDRMDFDEF	23.83	3	12	23.85	24.1	2.206	18.381	0.8441	High	23.84	23.88	2.139	17.827	0.8171	High	23.68	24.11	2.045	17.043	0.8512	High	23.64	23.7	2.45	20.415	0.748	High	23.64	23.75	2.465	20.545	0.9032	High	23.67	23.78	2.418	20.15	0.8392	High	23.62	23.83	2.531	21.092	0.8283	High	23.54
ULK1c	272	278	FFHHPFL	25.22	2	4	25.12	25.62	0.253	6.321	0.9484	High	25.22	25.46	0.28	7.01	0.9486	High	25.18	25.47	0.28	6.994	0.9372	High	24.94	25.46	0.521	13.037	0.9394	High	24.91	25.4	0.534	13.346	0.9246	High	25.06	25.23	0.559	13.972	0.9207	High	24.92	25.46	0.643	16.083	0.9244	High	24.8
ULK1c	273	278	FHHPFL	22.57	2	3	22.41	22.74	0.208	6.947	0.892	High	22.4	22.79	0.258	8.589	0.9444	High	22.43	22.78	0.233	7.754	0.9278	High	22.35	22.68	0.506	16.883	0.9297	High	22.2	22.55	0.497	16.575	0.9078	High	22.23	22.59	0.511	17.043	0.9322	High	22.24	22.4	0.612	20.414	0.9264	High	22.1
ULK1c	319	336	GEMQQLQKTLASPADTAG	24.29	2	15	23.65	23.7	3.887	25.911	0.8251	High	23.41	23.48	3.862	25.747	0.7967	High	23.38	23.61	3.922	26.149	0.9021	High	23.31	23.54	4.148	27.65	0.8792	High	23.51	23.58	4.232	28.212	0.6007	High	23.3	23.4	4.334	28.891	0.8981	High	23.42	23.44	4.489	29.927	0.2778	High	23.18
ULK1c	324	336	LQKTLASPADTAG	14.98	2	10	14.7	14.97	6.17	61.7	0.8972	High	14.92	14.96	6.057	60.568	0.7338	High	14.77	14.83	6.103	61.027	0.8169	High	14.73	14.86	6.135	61.354	0.8444	High	14.54	14.85	6.102	61.024	0.8548	High	14.63	14.97	6.223	62.229	0.8698	High	14.68	14.89	6.253	62.525	0.8781	High	14.56
ULK1c	357	368	FVMVPAQFPGDL	28.4	2	8	28.61	28.96	3.319	41.486	0.8711	High	27.06	27.28	3.198	39.972	0.8496	High	27.06	27.19	3.234	40.421	0.8541	High	27.06	27.19	3.287	41.084	0.8468	High	27.03	28.9	3.381	42.259	0.8922	High	26.94	27.23	3.427	42.841	0.899	High	26.96	28.93	3.495	43.685	0.6928	High	26.7
ULK1c	369	382	VAEAPSAKPPPDSL	16.92	2	8	17.13	17.21	5.299	66.234	0.867	High	16.79	16.86	5.203	65.034	0.8485	High	16.73	16.85	5.269	65.867	0.9123	High	16.61	16.67	5.509	68.86	0.8015	High	16.78	16.93	5.536	69.201	0.8828	High	16.7	16.88	5.458	68.229	0.8751	High	16.74	16.99	5.642	70.525	0.9032	High	16.52
ULK1c	369	383	VAEAPSAKPPPDSLM	18.84	2	9	19.36	19.45	5.621	62.455	0.7316	High	18.75	18.95	5.493	61.038	0.9219	High	18.76	19.07	5.582	62.018	0.9129	High	18.57	18.7	5.906	65.621	0.8043	High	18.85	19.11	5.968	66.309	0.9197	High	18.76	18.99	5.943	66.033	0.9201	High	18.97	19.02	6	66.67	0.8414	High	18.75
ULK1c	371	383	EAPSAKPPPDSLM	19.03	2	7	18.48	18.69	4.938	70.548	0.7363	High	18.38	18.42	4.856	69.376	0.7477	High	18.29	18.32	4.884	69.766	0.7372	High	18.16	18.32	4.925	70.362	0.7805	High	18.35	18.57	4.959	70.839	0.8916	High	18.23	18.49	4.914	70.206	0.8165	High	18.18	18.45	5.022	71.743	0.6557	High	18.09
ULK1c	396	441	ESHGRTPSPSPPCSSSPSPSGRAGPFSSSRCGASVPIPVPTQVQNY	25.21	4	34	23.73	23.91	18.958	55.758	0.6559	High	23.75	24.13	18.391	54.091	0.8409	High	23.82	24.17	18.764	55.187	0.7339	High	23.76	23.87	20.524	60.365	0.5322	High	23.78	24.08	20.438	60.112	0.7841	High	23.73	24.05	20.966	61.663	0.6738	High	23.63	24.02	20.69	60.853	0.4028	High	23.88
ULK1c	442	453	QRIERNLQSPTQ	15.04	2	9	15.2	15.35	6.366	70.733	0.8643	High	14.93	15.03	6.314	70.155	0.8525	High	14.74	15.01	6.293	69.921	0.8698	High	14.8	15	6.478	71.975	0.9136	High	14.63	14.86	6.571	73.01	0.8224	High	15.06	15.26	6.505	72.282	0.8369	High	15.08	15.2	6.5	72.226	0.7182	High	14.57
ULK1c	454	461	FQTPRSSA	13.4	2	5	13.33	13.33	3.78	75.594	0.7707	High	13.6	13.66	3.74	74.801	0.6987	High	13.31	13.34	3.722	74.436	0.7497	High	13.2	13.39	3.682	73.633	0.8974	High	13.08	13.43	3.766	75.323	0.9009	High	13.11	13.44	3.761	75.228	0.8852	High	13.32	13.59	3.804	76.086	0.7479	High	12.84
ULK1c	462	472	IRRSGSTSPLG	15.44	2	8	14.38	14.56	4.885	61.061	0.8571	High							14.17	14.22	4.873	60.91	0.7643	High	13.98	14.1	4.895	61.189	0.8452	High	13.98	14.75	4.901	61.259	0.8936	High	13.97	14.75	4.882	61.02	0.8508	High	14.23	14.46	4.901	61.259	0.8638	High	14.12
ULK1c	474	490	ARASPSPPAHAEHGGVL	17.48	2	12	16.92	16.97	5.702	47.52	0.8299	High	16.98	17.14	5.335	44.455	0.87	High	16.8	16.96	5.501	45.841	0.9074	High	16.72	16.85	5.645	47.042	0.8245	High	16.6	16.76	5.771	48.09	0.8627	High	16.61	16.91	5.665	47.205	0.8556	High	16.57	16.74	5.773	48.112	0.7763	High	16.58
ULK1c	474	490	ARASPSPPAHAEHGGVL	17.48	3	12	16.75	17.17	5.497	45.807	0.7761	High	16.76	16.81	5.252	43.764	0.8639	High	16.72	17.29	5.44	45.337	0.8768	High	16.6	17.1	5.379	44.825	0.8273	High	16.58	16.97	5.535	46.125	0.8086	High	16.58	16.96	5.532	46.103	0.7709	High	16.59	17.02	5.448	45.402	0.6902	High	16.42
ULK1c	475	491	RASPSPPAHAEHGGVLA	17.05	2	12	16.73	17.13	5.539	46.156	0.817	High	16.79	17.08	5.357	44.646	0.8813	High	16.65	16.94	5.554	46.284	0.8922	High	16.62	16.99	5.722	47.684	0.885	High	16.41	16.83	5.714	47.614	0.8596	High	16.61	16.91	5.662	47.184	0.8556	High	16.61	16.9	5.544	46.202	0.7694	High	16.44
ULK1c	491	528	ARKMSLGGGRPYTPSPQVGTIPERPGWSGTPSPQGAEM	22.97	3	29							23.03	23.08	16.428	56.647	0.8255	High	23.01	23.46	16.602	57.249	0.8852	High							22.81	23.13	17.796	61.366	0.9018	High	22.82	23.21	17.804	61.392	0.8706	High							22.71
ULK1c	491	528	ARKMSLGGGRPYTPSPQVGTIPERPGWSGTPSPQGAEM	22.97	4	29							22.84	22.89	16.81	57.967	0.6646	High	22.83	23.06	16.704	57.599	0.8773	High	22.79	23.28	16.908	58.304	0.9015	High	22.93	22.97	17.856	61.571	0.8695	High	22.77	23.12	17.822	61.454	0.9016	High							22.68
ULK1c	529	550	RGGRSPRPGSSAPEHSPRTSGL	16.53	3	16	16.28	16.56	8.457	52.857	0.7754	High	16.32	16.43	8.429	52.681	0.725	High	16.25	16.59	8.569	53.556	0.7692	High	16.29	16.46	8.857	55.358	0.7406	High	15.99	16.41	8.639	53.996	0.7872	High	16.1	16.41	8.77	54.815	0.7563	High							16.02
ULK1c	529	551	RGGRSPRPGSSAPEHSPRTSGLG	15.45	3	17	15.41	15.48	9.102	53.542	0.7642	High	15.33	15.48	8.97	52.764	0.7778	High	15.27	15.47	9.087	53.453	0.8902	High	15.04	15.33	9.457	55.632	0.8137	High	15.1	15.36	9.354	55.024	0.9032	High	15.08	15.42	9.372	55.128	0.8845	High	15.33	15.38	9.211	54.185	0.3894	High	14.91
ULK1c	529	554	RGGRSPRPGSSAPEHSPRTSGLGCRL	20.47	3	20	20.31	20.35	10.691	53.455	0.6879	High	20.26	20.41	10.702	53.512	0.664	High	20.28	20.42	10.621	53.107	0.6182	High	20.16	20.33	10.608	53.041	0.7482	High	20.05	20.21	10.69	53.448	0.6731	High	20.04	20.15	10.935	54.675	0.6867	High	20.01	20.22	10.603	53.016	0.6428	High	19.92
ULK1c	529	554	RGGRSPRPGSSAPEHSPRTSGLGCRL	20.47	4	20	20.31	20.58	10.935	54.673	0.7042	High	20.14	20.41	10.708	53.541	0.4465	High	20.19	20.54	10.789	53.945	0.6022	High	19.89	20.71	10.749	53.746	0.7007	High	19.94	20.3	10.901	54.507	0.6912	High	20.06	20.23	10.907	54.533	0.5522	High	19.96	20.3	10.702	53.512	0.2613	High	19.91
ULK1c	555	563	HSAPNLSDL	21	2	6	21.01	21.08	3.566	59.435	0.8141	High	20.98	21.02	3.468	57.808	0.6752	High	20.76	20.99	3.504	58.407	0.8634	High	20.63	20.75	3.545	59.082	0.8826	High	20.72	20.89	3.585	59.749	0.8454	High	20.81	20.86	3.622	60.373	0.8359	High	20.76	20.81	3.566	59.437	0.8024	High	20.59
ULK1c	564	580	HVVRPKLPKPPTDPLGA	21.55	3	10	21.06	21.31	6.122	61.225	0.6377	High	21.3	21.41	6.134	61.344	0.8047	High	21.17	21.73	6.244	62.439	0.8932	High	21.23	21.34	6.288	62.882	0.814	High	21.13	21.29	6.296	62.965	0.8516	High	21.2	21.4	6.283	62.833	0.8562	High	21.37	21.48	6.31	63.095	0.8573	High	20.98
ULK1c	581	598	VFSPPQASPPQPSHGLQS	18.36	2	11	18.29	18.52	6.183	56.208	0.7897	High	18.4	18.56	6.099	55.445	0.8151	High	18.27	18.46	6.059	55.085	0.8538	High	18.27	18.29	6.198	56.345	0.8029	High	18.33	18.5	6.082	55.289	0.8243	High	18.31	18.38	6.273	57.027	0.8035	High	18.44	18.62	6.203	56.39	0.709	High	18.1
ULK1c	599	611	CRNLRGSPKLPDF	22.92	2	9	22.79	23.16	5.476	60.847	0.908	High	22.98	23.18	5.514	61.269	0.6466	High	23.01	23.14	5.339	59.328	0.6662	High	22.95	23.12	5.378	59.759	0.7323	High	22.71	22.93	5.486	60.955	0.8908	High	22.85	23.08	5.304	58.93	0.8274	High							22.78
ULK1c	599	611	CRNLRGSPKLPDF	22.92	3	9	22.95	23.09	5.56	61.779	0.8799	High	23.01	23.07	5.526	61.395	0.6891	High	22.67	22.77	5.47	60.774	0.7022	High	22.49	22.77	5.335	59.276	0.8846	High	22.78	23.01	5.511	61.235	0.8148	High	22.78	22.93	5.345	59.392	0.8808	High	22.85	22.91	5.535	61.496	0.8324	High	22.51
ULK1c	612	642	LQRNPLPPILGSPTKAVPSFDFPKTPSSQNL	27.14	3	22	27.17	27.21	13.965	63.476	0.8691	High	26.93	27	12.994	59.064	0.8146	High	27	27.06	13.223	60.106	0.8711	High	27.27	27.34	13.096	59.526	0.9093	High	26.74	26.79	13.641	62.005	0.6935	High	27.13	27.38	13.798	62.716	0.774	High							26.84
ULK1c	612	642	LQRNPLPPILGSPTKAVPSFDFPKTPSSQNL	27.14	4	22	26.88	27.07	13.563	61.651	0.7926	High	26.96	27.24	13.535	61.523	0.7791	High	27.02	27.11	13.183	59.923	0.826	High	26.95	27.21	13.31	60.502	0.8371	High	26.96	27.09	13.366	60.755	0.7436	High	26.87	27.11	13.238	60.175	0.7911	High	26.88	27.04	13.281	60.367	0.783	High	26.8
ULK1c	646	664	LARQGVVMTPPRNRTLPDL	23.09	3	14							22.74	23	8.956	63.969	0.9426	High	22.66	23.09	9.153	65.379	0.9167	High	22.77	23.28	9.4	67.142	0.8928	High	22.78	22.95	9.785	69.89	0.919	High	22.68	23.1	9.858	70.417	0.8862	High							22.65
ULK1c	646	664	LARQGVVMTPPRNRTLPDL	23.09	4	14	22.76	23.01	9.403	67.165	0.7172	High	22.8	23.1	9.071	64.796	0.8479	High	22.74	23.01	9.255	66.104	0.6844	High	22.92	23.08	9.384	67.026	0.7739	High	22.44	22.98	9.681	69.147	0.8391	High	22.44	22.85	9.597	68.548	0.7559	High							22.69
ULK1c	665	692	SEVGPFHGQPLGPGLRPGEDPKGPFGRS	24.26	3	20							24.13	24.29	9.931	49.655	0.8516	High	24.21	24.6	10.133	50.664	0.9079	High	24.14	24.36	10.437	52.183	0.9023	High	24.28	24.4	10.83	54.149	0.8914	High	24.26	24.45	10.816	54.082	0.8791	High							24.07
ULK1c	665	692	SEVGPFHGQPLGPGLRPGEDPKGPFGRS	24.26	4	20							24.24	24.47	10.114	50.571	0.8905	High	24.24	24.76	10.241	51.207	0.89	High	24.09	24.39	10.474	52.372	0.8833	High	24.3	24.5	10.883	54.416	0.8726	High	24.1	24.41	10.964	54.819	0.8891	High							24.03
ULK1c	693	698	FSTSRL	18.17	2	4	17.83	17.9	2.877	71.92	0.6106	High	17.88	17.97	2.819	70.481	0.8583	High	17.77	18	2.853	71.323	0.8519	High	17.73	17.97	2.899	72.485	0.8229	High	17.95	18	2.896	72.388	0.9003	High	17.88	17.91	2.939	73.463	0.6953	High	17.78	18	2.999	74.98	0.7409	High	17.54
ULK1c	703	720	LKAAFGTQAPDPGSTESL	21.23	2	14	21.15	21.24	6.489	46.347	0.6621	High	21.09	21.27	6.358	45.414	0.7546	High	20.97	21.22	6.308	45.057	0.8015	High	20.92	21.27	7.079	50.563	0.8092	High	20.97	21.13	7.253	51.807	0.7112	High	20.99	21.2	7.184	51.314	0.6728	High	20.88	21.27	7.915	56.537	0.7864	High	20.93
ULK1c	704	720	KAAFGTQAPDPGSTESL	19.84	2	13	19.76	19.99	7.237	55.672	0.8686	High	19.78	20.02	7.164	55.104	0.8581	High	19.7	19.98	7.126	54.819	0.8472	High	19.65	19.92	7.498	57.678	0.7326	High	19.68	19.87	7.537	57.974	0.7995	High	19.74	19.86	7.438	57.216	0.8526	High	19.63	19.92	7.614	58.573	0.8349	High	19.7
ULK1c	721	733	QEKPMEIAPSAGF	22.18	2	9	21.94	22.2	4.886	54.287	0.7306	High	21.76	22.24	4.813	53.473	0.8343	High	21.98	22.05	4.822	53.58	0.8116	High	21.74	21.9	5.584	62.041	0.7666	High	21.8	22.06	5.691	63.238	0.8047	High	21.87	21.99	5.6	62.219	0.8445	High	21.85	22.01	5.652	62.803	0.8759	High	21.71
ULK1c	721	754	QEKPMEIAPSAGFGGSLHPGARAGGTSSPSPVVF	26.57	3	27	25.55	25.62	15.349	56.847	0.4653	High	25.51	25.91	14.928	55.29	0.7593	High	25.45	25.63	15.145	56.094	0.8088	High	25.24	25.41	15.896	58.875	0.659	High	25.46	25.56	15.812	58.563	0.6694	High	25.12	25.31	15.996	59.244	0.5854	High							25.09
ULK1c	734	754	GGSLHPGARAGGTSSPSPVVF	21.49	2	16							21.27	21.42	8.639	53.993	0.8594	High	21.29	21.37	8.908	55.678	0.8819	High							21.17	21.47	9.347	58.417	0.8884	High	21.08	21.62	9.518	59.488	0.8883	High							21.08
ULK1c	734	754	GGSLHPGARAGGTSSPSPVVF	21.49	3	16							21.16	21.35	9.067	56.668	0.7859	High	21.14	21.48	8.8	55.001	0.7501	High							21.13	21.35	9.473	59.206	0.8452	High	21.03	21.36	9.564	59.777	0.8291	High							21.02
ULK1c	774	810	FSAGPTGSASSSARHLVPGPCSEAPAPELPAPGHGCS	21.97	3	28							21.8	22.22	12.36	44.143	0.9092	High	21.76	22.25	12.899	46.068	0.9245	High	21.73	21.88	13.353	47.691	0.9152	High	21.66	22.1	14.109	50.389	0.9203	High	21.72	22.09	14.075	50.268	0.9202	High							21.66
ULK1c	774	810	FSAGPTGSASSSARHLVPGPCSEAPAPELPAPGHGCS	21.97	4	28							21.87	22.17	12.607	45.024	0.8784	High	21.87	22.23	12.668	45.241	0.8745	High	21.84	22.06	13.193	47.118	0.9008	High	21.88	22.06	13.557	48.418	0.8465	High	21.8	22.01	13.438	47.992	0.8639	High							21.63
ULK1c	811	819	FADPITANL	24.23	2	6	24.16	24.32	3.004	50.06	0.8007	High	24.06	24.11	2.978	49.628	0.8479	High	24.03	24.31	2.994	49.901	0.7956	High	24.08	24.22	3.104	51.737	0.8599	High	24.07	24.37	3.126	52.095	0.7356	High	23.78	23.91	3.093	51.544	0.7908	High	23.86	24.03	3.038	50.638	0.7686	High	23.93
ULK1c	836	844	MEQEHTEIL	20.74	2	7	20.76	20.84	4.967	70.96	0.7675	High	20.65	20.9	4.981	71.163	0.6917	High	20.68	21.03	4.925	70.359	0.8043	High	20.65	20.78	5.201	74.297	0.6945	High	20.53	20.63	5.302	75.738	0.8291	High	20.64	20.77	5.242	74.88	0.7731	High	20.51	20.67	5.41	77.281	0.7355	High	20.57
ULK1c	836	852	MEQEHTEILRGLRFTLL	30.03	3	15	29.65	30.08	2.989	19.928	0.8327	High	29.76	30.17	3.02	20.134	0.8189	High	29.73	29.92	3.131	20.873	0.8658	High	29.72	29.85	5.125	34.164	0.839	High	29.75	29.89	5.152	34.345	0.7729	High	29.58	29.74	5.132	34.215	0.8219	High	29.6	29.72	6.667	44.445	0.6467	High	29.68
ULK1c	839	883	EHTEILRGLRFTLLFVQHVLEIAALKGSASEAAGGPEYQLQESVV	28.83	6	42	28.49	28.58	15.874	37.795	0.5884	High	28.63	28.76	15.495	36.894	0.5258	High	28.64	28.79	15.329	36.497	0.6383	High	28.51	28.86	17.93	42.691	0.6902	High	28.45	28.56	17.947	42.73	0.5488	High	28.4	28.5	17.998	42.852	0.6031	High	28.45	28.56	19.348	46.067	0.5635	High	28.29
ULK1c	853	859	FVQHVLE	18.52	2	5	18.23	18.31	0.065	1.302	0.8282	High	18.19	18.35	0.102	2.039	0.819	High	18.16	18.4	0.102	2.04	0.8059	High	18.06	18.22	0.224	4.477	0.9286	High	18.04	18.25	0.18	3.596	0.8858	High	18.02	18.26	0.185	3.71	0.8617	High	18	18.27	0.294	5.885	0.9231	High	18.03
ULK1c	890	896	LSREWGF	26.43	2	5	24.96	25.25	1.3	26.003	0.8018	High	25.02	25.16	1.341	26.825	0.6369	High	24.93	25.49	1.26	25.194	0.8123	High	24.95	25.16	1.851	37.012	0.6133	High	24.92	24.95	1.83	36.606	0.7537	High	24.75	24.83	1.924	38.477	0.7873	High							24.6
ULK1c	903	909	YLKVAEL	22.59	2	5	22.21	22.45	0.048	0.959	0.6901	High	22.19	22.5	0.098	1.951	0.7349	High	22.38	22.5	0.111	2.215	0.745	High	22.1	22.44	0.119	2.39	0.7252	High	21.98	22.4	0.1	2.008	0.7341	High	22.05	22.44	0.069	1.377	0.7095	High	22.32	22.43	0.061	1.224	0.7056	High	21.92
ULK1c	910	926	LSSGLQSAIDQIRAGKL	28.87	3	15	28.47	28.57	0.439	2.928	0.7734	High	28.37	28.84	0.298	1.988	0.7409	High	28.38	28.8	0.315	2.101	0.7737	High	28.37	28.86	1.467	9.78	0.7272	High	28.3	28.73	1.644	10.959	0.7667	High	28.29	28.7	1.635	10.898	0.8599	High	28.23	28.46	4.375	29.165	0.7883	High	28.23
ULK1c	927	942	CLSSTVKQVVRRLNEL	30.43	3	14	29.63	29.78	1.844	13.173	0.4999	High	29.49	29.79	1.723	12.306	0.6797	High	29.52	29.76	1.843	13.167	0.7964	High	29.47	29.68	2.915	20.825	0.6587	High	29.38	29.6	2.958	21.126	0.5915	High	29.42	29.63	2.853	20.377	0.7221	High							29.23
ULK1c	961	967	FLDKQRL	19.23	2	5	18.83	19.04	1.057	21.143	0.4142	High							18.64	18.93	1.068	21.352	0.8464	High	18.54	19.07	1.76	35.193	0.8383	High	18.7	18.93	1.745	34.898	0.8218	High	18.44	18.84	1.801	36.021	0.3861	High							18.52
ULK1c	980	986	IFSHAVQ	15.14	2	5	14.88	15.12	0.198	3.955	0.883	High	14.96	15.31	0.171	3.423	0.8763	High	14.86	15.2	0.178	3.561	0.9143	High	14.73	15.16	0.319	6.373	0.866	High	14.78	15.09	0.389	7.785	0.8754	High	14.94	14.97	0.354	7.081	0.8833	High							14.49
ULK1c	997	1012	FQHREGCVPRYHKALL	22.46	3	13	21.27	21.53	3.282	25.244	0.8843	High	21.2	21.31	3.267	25.132	0.7774	High	21.25	21.54	3.196	24.586	0.8949	High	21.12	21.4	4.13	31.773	0.8845	High	21.02	21.27	4.044	31.106	0.8229	High	21	21.29	3.931	30.237	0.7707	High	21.04	21.31	4.528	34.832	0.7837	High	21.01
ULK1c	997	1013	FQHREGCVPRYHKALLL	23.66	3	14	23.79	23.91	3.182	22.727	0.7501	High	23.42	23.5	2.954	21.103	0.8907	High	23.37	23.65	3.119	22.28	0.9225	High	23.36	23.63	3.946	28.183	0.91	High	23.1	23.46	4.234	30.241	0.9063	High	23.2	23.57	4.092	29.227	0.879	High	23.17	23.7	4.522	32.297	0.8383	High	23.11
ULK1c	997	1013	FQHREGCVPRYHKALLL	23.66	4	14							23.34	23.81	3.082	22.013	0.8221	High	23.33	23.93	3.266	23.329	0.8473	High	23.29	23.73	4.33	30.929	0.7794	High	23.13	23.63	4.331	30.936	0.8024	High	23.12	23.59	4.154	29.673	0.6826	High	23.29	23.5	4.857	34.691	0.6489	High	23.09
ULK1c	997	1014	FQHREGCVPRYHKALLLL	26.33	3	15	26.21	26.47	3.091	20.61	0.8144	High	26.26	26.33	2.896	19.31	0.7854	High	26.29	26.52	2.988	19.918	0.8583	High	26.18	26.49	3.721	24.807	0.8332	High	26.11	26.21	3.831	25.538	0.8283	High	26.19	26.32	3.75	25.002	0.5101	High	25.98	26.12	5.029	33.527	0.6822	High	25.98
ULK1c	1045	1056	LTGICAHHHHHH	15.31	2	10	15.01	15.35	1.431	14.313	0.8424	High	15.03	15.39	1.279	12.791	0.8891	High	14.93	15.33	1.412	14.122	0.8715	High	14.8	14.98	1.78	17.797	0.8746	High	14.69	14.87	1.836	18.365	0.9212	High	14.63	14.94	1.783	17.831	0.9154	High	14.72	14.87	1.894	18.939	0.8331	High	14.54
ULK1c	1045	1056	LTGICAHHHHHH	15.31	3	10	15.07	15.38	1.369	13.694	0.8179	High	14.95	15.22	1.217	12.172	0.8328	High	14.95	15.25	1.408	14.079	0.8625	High	14.87	14.96	1.71	17.097	0.8265	High	14.54	14.71	1.779	17.787	0.8399	High	14.59	14.91	1.806	18.062	0.8749	High	14.58	14.87	1.942	19.421	0.8275	High	14.45
ULK1c+NDP52	15	27	EFSRKDLIGHGAF	23.5	2	11							23.16	23.46	3.382	30.742	0.9061	High	23.16	23.39	3.259	29.625	0.8957	High	23.02	23.31	4.673	42.484	0.9059	High	22.92	23.27	4.571	41.553	0.8951	High	22.9	23.27	4.547	41.337	0.9028	High							22.94
ULK1c+NDP52	15	27	EFSRKDLIGHGAF	23.5	3	11							23.17	23.49	3.511	31.915	0.8592	High	23.12	23.43	3.274	29.762	0.8712	High	22.99	23.3	4.738	43.073	0.8762	High	22.92	23.3	4.59	41.729	0.8134	High	22.9	23.25	4.533	41.208	0.8434	High							23.15
ULK1c+NDP52	17	27	SRKDLIGHGAF	20.81	2	9	20.57	21.03	2.399	26.65	0.9174	High	20.53	20.98	2.207	24.521	0.9088	High	20.47	20.91	2.161	24.01	0.9099	High	20.3	20.79	3.012	33.464	0.8835	High	20.23	20.76	2.94	32.662	0.8938	High	20.23	20.72	2.834	31.49	0.8945	High							20.22
ULK1c+NDP52	17	27	SRKDLIGHGAF	20.81	3	9	20.83	20.86	2.315	25.721	0.8767	High	20.55	20.96	2.222	24.684	0.908	High	20.42	20.91	2.258	25.091	0.9126	High	20.33	20.76	3.158	35.084	0.895	High	20.26	20.71	3.147	34.971	0.8669	High	20.25	20.75	2.909	32.318	0.897	High							20.27
ULK1c+NDP52	28	42	AVVFKGRHREKHDLE	17.68	2	13	17.44	17.73	0.797	6.132	0.9096	High	17.41	17.72	0.617	4.747	0.9403	High	17.41	17.63	0.555	4.266	0.9396	High	17.04	17.4	1.301	10.005	0.9207	High	17.08	17.28	1.144	8.802	0.9213	High	17	17.31	1.104	8.491	0.9322	High	17.35	17.62	2.316	17.818	0.8837	High	16.92
ULK1c+NDP52	28	42	AVVFKGRHREKHDLE	17.68	3	13	17.47	17.72	0.911	7.009	0.9376	High	17.39	17.71	0.846	6.507	0.9496	High	17.32	17.75	0.756	5.813	0.9529	High	17.06	17.61	1.444	11.111	0.9162	High	17.02	17.45	1.491	11.469	0.925	High	17	17.48	1.359	10.455	0.9205	High	17.3	17.75	2.605	20.041	0.8991	High	16.93
ULK1c+NDP52	28	42	AVVFKGRHREKHDLE	17.68	4	13	17.38	17.81	0.78	6.001	0.8712	High	17.35	17.82	0.725	5.58	0.8515	High	17.31	17.77	0.674	5.183	0.8499	High	17.07	17.46	1.288	9.909	0.8752	High	17.08	17.34	1.56	12.002	0.8506	High	17.03	17.34	1.4	10.77	0.7633	High	17.36	17.73	2.479	19.071	0.8924	High	17.05
ULK1c+NDP52	28	43	AVVFKGRHREKHDLEV	20.27	2	14	19.77	20.11	0.791	5.65	0.8994	High	19.83	20.06	0.71	5.069	0.9351	High	19.72	20.04	0.716	5.117	0.9346	High	19.47	19.82	1.536	10.975	0.9057	High	19.42	19.75	1.639	11.705	0.9138	High	19.41	19.71	1.501	10.723	0.9267	High	19.67	20	2.975	21.248	0.9012	High	19.39
ULK1c+NDP52	28	43	AVVFKGRHREKHDLEV	20.27	3	14	19.82	20.18	0.916	6.54	0.916	High	19.82	20.03	0.851	6.079	0.9245	High	19.76	19.92	0.847	6.051	0.9124	High	19.43	19.79	1.676	11.969	0.8817	High	19.39	19.8	1.684	12.032	0.8898	High	19.33	19.79	1.675	11.964	0.8783	High	19.67	20.05	3.147	22.478	0.8934	High	19.39
ULK1c+NDP52	28	43	AVVFKGRHREKHDLEV	20.27	4	14	19.82	20.1	0.984	7.032	0.8713	High	19.73	20.1	0.989	7.066	0.8502	High	19.72	20.04	0.69	4.929	0.8967	High	19.47	19.87	1.525	10.894	0.9118	High	19.45	19.74	2.039	14.563	0.8345	High	19.45	19.7	1.757	12.547	0.884	High	19.68	19.83	3.304	23.597	0.8319	High	19.48
ULK1c+NDP52	28	78	AVVFKGRHREKHDLEVAVKCINKKNLAKSQTLLGKEIKILKELKHENIVAL	31.05	5	49	30.06	30.32	12.464	25.437	0.7542	High	30.06	30.38	11.572	23.616	0.775	High	30.08	30.34	12.009	24.509	0.7435	High	29.81	30.12	15.972	32.597	0.6607	High	29.85	30.1	15.621	31.879	0.6565	High	29.75	29.93	15.844	32.335	0.528	High	29.96	30.22	20.621	42.084	0.63	High	29.79
ULK1c+NDP52	29	44	VVFKGRHREKHDLEVA	19.13	3	14	19.79	20.14	0.928	6.631	0.9098	High	19.78	20.1	0.837	5.981	0.92	High	19.76	19.92	0.845	6.034	0.9124	High	19.43	19.85	1.671	11.937	0.884	High	19.46	19.78	1.677	11.979	0.8967	High	19.39	19.68	1.697	12.118	0.8773	High	20.03	20.07	2.83	20.212	0.884	High	19.37
ULK1c+NDP52	43	59	VAVKCINKKNLAKSQTL	19.91	3	15	18.5	18.72	7.902	52.677	0.86	High	18.44	18.67	7.763	51.755	0.8522	High	18.5	18.67	7.83	52.202	0.8453	High	18.27	18.34	8.141	54.273	0.7403	High	18.32	18.42	8.05	53.665	0.6834	High	18.17	18.66	7.863	52.417	0.6867	High	18.33	18.68	8.317	55.444	0.786	High	18.14
ULK1c+NDP52	43	60	VAVKCINKKNLAKSQTLL	22.27	3	16	21.07	21.22	8.174	51.085	0.7968	High	20.93	21.13	8.314	51.96	0.788	High	20.71	21.03	8.341	52.131	0.8755	High	20.59	20.86	8.676	54.223	0.8314	High	20.64	20.81	8.804	55.024	0.7988	High	20.64	20.76	8.685	54.28	0.8161	High	20.76	21.11	9.175	57.347	0.7891	High	20.5
ULK1c+NDP52	43	78	VAVKCINKKNLAKSQTLLGKEIKILKELKHENIVAL	29.69	4	34	29.48	29.82	11.267	33.139	0.9124	High	29.51	29.85	10.94	32.178	0.9269	High	29.55	29.88	10.772	31.683	0.9107	High	29.29	29.65	13.128	38.613	0.9153	High	29.27	29.56	13.235	38.928	0.9208	High	29.28	29.65	13.06	38.413	0.904	High	29.65	29.79	17.224	50.658	0.8348	High	29.27
ULK1c+NDP52	43	78	VAVKCINKKNLAKSQTLLGKEIKILKELKHENIVAL	29.69	5	34	29.45	29.71	11.104	32.659	0.8052	High	29.46	29.75	10.993	32.332	0.8522	High	29.48	29.77	10.942	32.182	0.8845	High	29.34	29.56	13.188	38.789	0.8625	High	29.25	29.47	13.496	39.694	0.8322	High	29.28	29.58	13.15	38.675	0.7981	High	29.36	29.65	17.731	52.149	0.7675	High	29.24
ULK1c+NDP52	44	59	AVKCINKKNLAKSQTL	17.91	3	14	17.65	17.87	7.862	56.156	0.8504	High	17.63	17.86	7.838	55.985	0.8228	High	17.55	17.83	7.623	54.448	0.8999	High	17.37	17.71	7.748	55.343	0.8518	High	17.45	17.72	7.856	56.114	0.8216	High	17.3	17.65	7.844	56.027	0.8227	High	17.57	17.92	8.096	57.83	0.8455	High	17.5
ULK1c+NDP52	44	60	AVKCINKKNLAKSQTLL	20.66	3	15	20.47	20.64	8.393	55.951	0.8351	High	20.2	20.55	8.371	55.81	0.7983	High	20.25	20.54	8.266	55.108	0.8404	High	20.09	20.35	8.791	58.606	0.7839	High	20.04	20.23	8.75	58.334	0.8507	High	19.99	20.29	8.584	57.229	0.7864	High	20.28	20.46	8.995	59.965	0.8288	High	20.1
ULK1c+NDP52	44	63	AVKCINKKNLAKSQTLLGKE	20.61	3	18	19.59	19.71	9.372	52.065	0.5572	High	19.51	19.81	9.268	51.488	0.554	High	19.44	19.79	9.206	51.142	0.5647	High	19.28	19.58	10.037	55.761	0.8721	High	19.22	19.56	10.055	55.863	0.7141	High	19.16	19.55	9.957	55.318	0.7355	High	19.6	19.63	10.042	55.788	0.7011	High	19.16
ULK1c+NDP52	44	77	AVKCINKKNLAKSQTLLGKEIKILKELKHENIVA	29.24	4	32	28.33	28.51	11.084	34.639	0.8144	High	28.1	28.52	10.824	33.824	0.8642	High	28.17	28.63	10.574	33.043	0.8797	High	27.94	28.28	12.644	39.512	0.8494	High	27.94	28.14	12.979	40.558	0.8313	High	27.91	28.3	12.567	39.272	0.8547	High	28.27	28.5	16.141	50.44	0.8254	High	27.94
ULK1c+NDP52	44	78	AVKCINKKNLAKSQTLLGKEIKILKELKHENIVAL	29.63	3	33	29.34	29.78	10.832	32.824	0.91	High	29.52	29.68	10.499	31.815	0.8888	High	29.43	29.72	10.376	31.443	0.9168	High	29.21	29.43	12.696	38.472	0.9211	High	29.21	29.51	12.697	38.476	0.8249	High	29.1	29.52	12.735	38.591	0.8648	High	29.34	29.66	16.878	51.144	0.8736	High	29.23
ULK1c+NDP52	44	78	AVKCINKKNLAKSQTLLGKEIKILKELKHENIVAL	29.63	4	33	29.43	29.73	11.122	33.704	0.937	High	29.33	29.89	10.691	32.397	0.9444	High	29.43	29.88	10.603	32.13	0.9346	High	29.27	29.56	13.025	39.468	0.9267	High	29.08	29.66	13.127	39.779	0.9209	High	29.27	29.43	12.974	39.314	0.9235	High	29.19	29.78	17.063	51.706	0.9379	High	29.19
ULK1c+NDP52	44	78	AVKCINKKNLAKSQTLLGKEIKILKELKHENIVAL	29.63	5	33	29.42	29.74	11.335	34.35	0.8737	High	29.48	29.77	10.955	33.198	0.8897	High	29.44	29.73	10.955	33.197	0.9126	High	29.2	29.48	13.476	40.836	0.857	High	29.22	29.5	13.286	40.261	0.8503	High	29.15	29.57	13.254	40.165	0.8724	High	29.44	29.67	17.672	53.552	0.8355	High	29.27
ULK1c+NDP52	60	77	LGKEIKILKELKHENIVA	25.72	3	16	25.68	25.88	2.676	16.727	0.9282	High	25.59	25.93	2.678	16.737	0.8819	High	25.62	25.79	2.59	16.185	0.9454	High	25.37	25.76	3.956	24.723	0.9103	High	25.45	25.61	4.006	25.041	0.8904	High	25.42	25.56	4.087	25.544	0.8269	High	25.52	25.91	7.107	44.419	0.8141	High	25.42
ULK1c+NDP52	60	78	LGKEIKILKELKHENIVAL	26.68	3	17	26.47	26.71	2.936	17.268	0.9167	High	26.42	26.63	2.781	16.358	0.9183	High	26.4	26.61	2.753	16.192	0.9327	High	26.18	26.49	4.218	24.81	0.8953	High	26.2	26.43	4.317	25.393	0.927	High	26.1	26.46	4.153	24.427	0.9183	High	26.47	26.67	7.572	44.541	0.8489	High	26.1
ULK1c+NDP52	61	78	GKEIKILKELKHENIVAL	25.75	3	16	25.68	25.88	2.676	16.727	0.9282	High	25.65	25.87	2.641	16.507	0.8794	High	25.62	25.79	2.59	16.185	0.9454	High	25.37	25.76	3.956	24.723	0.9103	High	25.45	25.61	4.006	25.041	0.8904	High	25.44	25.65	4.018	25.11	0.8218	High	25.66	25.81	6.961	43.505	0.8223	High	25.34
ULK1c+NDP52	64	78	IKILKELKHENIVAL	25.27	2	13	25.17	25.41	2.287	17.59	0.9361	High	25.15	25.41	2.195	16.886	0.9281	High	25.11	25.4	2.22	17.074	0.9255	High	24.95	25.24	2.857	21.975	0.9267	High	24.8	25.16	2.954	22.724	0.9196	High	24.92	25.21	2.738	21.061	0.9249	High	25.18	25.4	5.005	38.504	0.8853	High	24.93
ULK1c+NDP52	64	78	IKILKELKHENIVAL	25.27	3	13	25.14	25.45	2.268	17.443	0.913	High	25.2	25.48	2.163	16.637	0.9258	High	25.18	25.41	2.191	16.85	0.9098	High	24.92	25.21	2.952	22.706	0.9309	High	24.94	25.1	2.943	22.637	0.923	High	24.95	25.11	2.877	22.129	0.9334	High	25.26	25.4	5.189	39.914	0.8374	High	24.94
ULK1c+NDP52	103	117	YLHAMRTLSEDTIRL	27.49	2	13	26.16	26.31	0.699	5.378	0.8093	High	26.14	26.3	0.641	4.932	0.8732	High	26.1	26.26	0.563	4.331	0.8717	High	25.95	26.13	0.797	6.13	0.7895	High	25.9	26.11	0.648	4.982	0.7897	High	25.91	26.14	0.688	5.289	0.8356	High	26.05	26.26	1.031	7.932	0.817	High	26.01
ULK1c+NDP52	107	113	MRTLSED	14.62	2	5	14.22	14.72	1.939	38.772	0.8318	High	14.2	14.45	1.938	38.765	0.8659	High	14.17	14.54	1.905	38.11	0.8674	High	14.01	14.37	2.443	48.862	0.8548	High	14.04	14.26	2.468	49.364	0.8653	High	13.94	14.23	2.414	48.288	0.8569	High	14.46	14.56	3.234	64.684	0.8815	High	13.89
ULK1c+NDP52	117	144	LFLQQIAGAMRLLHSKGIIHRDLKPQNI	32.18	4	25	30.32	30.55	1.22	4.878	0.8508	High	30.3	30.53	1.082	4.326	0.8589	High	30.32	30.47	1.167	4.667	0.8593	High	30.05	30.4	1.384	5.537	0.8619	High	30.07	30.49	1.383	5.533	0.8296	High	30	30.54	1.485	5.939	0.8445	High	30.21	30.43	2.663	10.652	0.7794	High	30.2
ULK1c+NDP52	118	125	FLQQIAGA	20.89	2	6	19.63	19.77	0.033	0.556	0.7881	High	19.61	19.7	0.068	1.136	0.8243	High	19.58	19.79	0.063	1.05	0.8122	High	19.39	19.72	0.074	1.241	0.835	High	19.37	19.66	0.105	1.754	0.8504	High	19.48	19.66	0.124	2.071	0.8643	High	19.56	19.78	0.197	3.285	0.866	High	19.42
ULK1c+NDP52	118	145	FLQQIAGAMRLLHSKGIIHRDLKPQNIL	30.97	3	25	30.28	30.53	1.093	4.373	0.8779	High	30.24	30.54	1.122	4.488	0.8975	High	30.28	30.54	1.176	4.704	0.8884	High	30.02	30.38	1.557	6.23	0.9244	High	30.06	30.38	1.5	6	0.8475	High	30.04	30.42	1.657	6.629	0.8663	High	30.16	30.58	2.603	10.412	0.8537	High	30.09
ULK1c+NDP52	118	145	FLQQIAGAMRLLHSKGIIHRDLKPQNIL	30.97	4	25	30.32	30.55	1.226	4.903	0.8508	High	30.3	30.53	1.088	4.351	0.8589	High	30.32	30.47	1.173	4.691	0.8593	High	30.05	30.4	1.39	5.561	0.8619	High	30	30.56	1.397	5.589	0.8237	High	30	30.54	1.491	5.964	0.8445	High	30.26	30.43	2.873	11.49	0.8071	High	30.11
ULK1c+NDP52	118	145	FLQQIAGAMRLLHSKGIIHRDLKPQNIL	30.97	5	25	30.21	30.57	0.561	2.245	0.7868	High	30.26	30.48	0.995	3.982	0.8674	High	30.26	30.55	1.037	4.146	0.8561	High	29.99	30.46	1.205	4.818	0.8619	High	30.07	30.39	1.33	5.322	0.7632	High	29.96	30.44	1.729	6.917	0.7956	High	30.09	30.54	3.058	12.233	0.824	High	30.07
ULK1c+NDP52	126	145	MRLLHSKGIIHRDLKPQNIL	24.21	2	17	24.15	24.31	0.942	5.543	0.9117	High	24.1	24.42	0.983	5.784	0.9205	High	24.03	24.3	1.029	6.056	0.8873	High	23.76	24.04	1.236	7.269	0.9098	High	23.89	24.12	1.1	6.468	0.9146	High	23.78	23.97	1.42	8.354	0.7837	High	24.06	24.22	1.768	10.399	0.8224	High	23.86
ULK1c+NDP52	126	145	MRLLHSKGIIHRDLKPQNIL	24.21	3	17	24.06	24.29	0.959	5.639	0.9477	High	24.05	24.32	0.925	5.442	0.9358	High	24.07	24.3	0.898	5.284	0.9396	High	23.82	24.08	1.177	6.925	0.9493	High	23.84	23.99	1.163	6.841	0.9476	High	23.8	24.01	1.178	6.931	0.9321	High	23.99	24.19	1.823	10.723	0.9229	High	23.83
ULK1c+NDP52	126	145	MRLLHSKGIIHRDLKPQNIL	24.21	4	17	23.92	24.34	0.979	5.761	0.9466	High	24.09	24.3	0.957	5.629	0.9372	High	24.05	24.28	0.952	5.602	0.9492	High	23.86	24.02	1.188	6.988	0.9378	High	23.77	24.09	1.221	7.18	0.9478	High	23.78	24.01	1.221	7.18	0.9559	High	23.99	24.24	1.843	10.843	0.9448	High	23.84
ULK1c+NDP52	127	145	RLLHSKGIIHRDLKPQNIL	23.44	3	16	23.09	23.4	0.842	5.262	0.9168	High	23.19	23.34	0.884	5.525	0.9161	High	23.11	23.3	0.841	5.259	0.8921	High	22.99	23.03	1.067	6.669	0.8899	High	22.86	23.06	1.153	7.204	0.8744	High	22.82	23.14	1.185	7.403	0.8766	High	23.11	23.28	1.648	10.299	0.8622	High	22.89
ULK1c+NDP52	129	145	LHSKGIIHRDLKPQNIL	22.4	2	14	22.22	22.51	0.954	6.817	0.9154	High	22.18	22.5	1.021	7.29	0.9124	High	22.14	22.44	1.018	7.272	0.9231	High	21.95	22.28	1.292	9.228	0.8831	High	21.86	22.28	1.226	8.757	0.8948	High	21.9	22.24	1.103	7.876	0.8689	High	22.15	22.41	1.499	10.711	0.8544	High	21.97
ULK1c+NDP52	129	145	LHSKGIIHRDLKPQNIL	22.4	3	14	22.23	22.43	0.905	6.464	0.9239	High	22.24	22.46	0.851	6.077	0.934	High	22.26	22.42	0.852	6.083	0.9145	High	21.96	22.22	1.115	7.962	0.8975	High	22.04	22.2	1.108	7.917	0.9359	High	21.92	22.21	1.103	7.878	0.9298	High	22.13	22.44	1.722	12.297	0.9213	High	21.95
ULK1c+NDP52	146	158	LSNPAGRRANPNS	12.24	2	9	11.62	12.05	6.382	70.908	0.9087	High	11.56	11.93	6.233	69.255	0.9109	High	11.58	11.98	6.16	68.446	0.8906	High	11.41	11.74	6.388	70.981	0.9072	High	11.34	11.72	6.355	70.615	0.9116	High	11.31	11.72	6.269	69.654	0.9084	High	11.61	12.01	6.426	71.4	0.9036	High	11.37
ULK1c+NDP52	146	158	LSNPAGRRANPNS	12.24	3	9	11.63	12.09	6.527	72.521	0.8281	High	11.45	12.04	6.344	70.488	0.8705	High	11.64	11.98	6.237	69.296	0.8603	High	11.37	11.78	6.426	71.395	0.8814	High	11.33	11.79	6.397	71.075	0.9039	High	11.33	11.76	6.295	69.948	0.9032	High	11.55	12.08	6.452	71.69	0.884	High	11.36
ULK1c+NDP52	146	168	LSNPAGRRANPNSIRVKIADFGF	27.56	3	19	27.41	27.7	7.45	39.211	0.9128	High	27.37	27.72	7.339	38.628	0.9009	High	27.28	27.52	7.162	37.697	0.785	High	27.1	27.39	9.327	49.092	0.8792	High	27.14	27.41	9.074	47.759	0.8924	High	27.22	27.32	9.164	48.233	0.8768	High	27.29	27.67	9.716	51.134	0.8698	High	27.11
ULK1c+NDP52	146	176	LSNPAGRRANPNSIRVKIADFGFARYLQSNM	30.49	3	27	29.46	29.71	11.41	42.261	0.7734	High	29.46	29.66	11.327	41.953	0.7125	High	29.3	29.66	11.508	42.623	0.6787	High	29.22	29.31	14.801	54.818	0.6537	High	29.12	29.54	14.6	54.075	0.7518	High	29.12	29.5	14.582	54.007	0.6612	High	29.32	29.48	16.389	60.701	0.6938	High	29.05
ULK1c+NDP52	159	165	IRVKIAD	17.13	2	5	16.82	17.13	0.149	2.985	0.8505	High	16.64	17.64	0.132	2.648	0.8422	High	16.51	17.63	0.106	2.114	0.8168	High	16.54	16.98	0.334	6.682	0.8278	High	16.56	16.83	0.284	5.675	0.8301	High	16.46	16.86	0.352	7.034	0.8289	High	16.87	17.07	0.614	12.284	0.6777	High	16.46
ULK1c+NDP52	159	167	IRVKIADFG	22.69	2	7	22.34	22.67	0.33	4.714	0.9216	High	22.36	22.64	0.262	3.746	0.8802	High	22.31	22.64	0.327	4.664	0.8594	High	22.18	22.47	1.077	15.392	0.939	High	22.14	22.43	1.102	15.74	0.8414	High	22	22.41	1.102	15.745	0.9056	High	22.29	22.7	1.861	26.592	0.8893	High	22.18
ULK1c+NDP52	159	168	IRVKIADFGF	27.84	2	8	27.25	27.62	0.607	7.592	0.9114	High	27.19	27.65	0.607	7.591	0.9156	High	27.26	27.58	0.604	7.554	0.9152	High	27.07	27.37	1.542	19.28	0.8987	High	27.07	27.39	1.619	20.235	0.8982	High	27.04	27.37	1.59	19.879	0.8997	High	27.57	27.76	2.417	30.212	0.9037	High	26.99
ULK1c+NDP52	169	176	ARYLQSNM	17.83	2	6	17.71	17.9	4.144	69.064	0.8529	High	17.38	17.86	4.105	68.423	0.8691	High	17.41	17.82	4.129	68.814	0.8767	High	17.44	17.61	4.346	72.426	0.8925	High	17.33	17.61	4.333	72.225	0.8488	High	17.29	17.57	4.301	71.685	0.8712	High	17.84	17.95	4.353	72.549	0.8182	High	17.23
ULK1c+NDP52	182	194	CGSPMYMAPEVIM	26.09	2	9	26	26.15	1.22	13.56	0.8735	High	25.9	26.1	1.135	12.606	0.8832	High	25.88	26.07	1.14	12.666	0.8526	High	25.76	25.95	1.76	19.558	0.8878	High	25.78	26.04	1.715	19.053	0.8792	High	25.72	25.94	1.622	18.025	0.873	High	25.85	26.05	2.348	26.088	0.8707	High	25.68
ULK1c+NDP52	195	204	SQHYDGKADL	15.89	2	8	15.73	16.08	1.46	18.253	0.8287	High	15.77	15.83	1.552	19.403	0.7054	High	15.49	16.02	1.587	19.837	0.833	High	15.27	15.76	2.158	26.975	0.8831	High	15.36	15.75	2.122	26.526	0.7672	High	15.31	15.69	2.129	26.618	0.829	High							15.27
ULK1c+NDP52	197	204	HYDGKADL	15.55	2	6	15.25	15.44	1.008	16.795	0.8095	High	15.16	15.39	0.947	15.783	0.7717	High	15.23	15.25	0.968	16.141	0.7623	High	15.03	15.19	1.323	22.047	0.8701	High	14.92	15.2	1.359	22.651	0.8738	High	14.69	15.16	1.325	22.083	0.8513	High	15.3	15.34	1.572	26.194	0.7968	High	15.02
ULK1c+NDP52	205	213	WSIGTIVYQ	27.35	2	7	25.88	26.27	0.036	0.52	0.7594	High	26.04	26.18	0.119	1.696	0.832	High	25.92	26.27	0.079	1.134	0.7843	High	25.88	25.96	0.147	2.097	0.7592	High	25.88	26.13	0.24	3.426	0.8255	High	25.84	26.17	0.166	2.365	0.8364	High	26.17	26.2	0.169	2.418	0.7662	High	25.83
ULK1c+NDP52	205	215	WSIGTIVYQCL	33.31	2	9	33.18	33.55	0.089	0.989	0.8165	High	33.33	33.42	0.091	1.014	0.7533	High	33.16	33.46	0.117	1.305	0.8383	High	33.01	33.42	0.172	1.915	0.8405	High	32.99	33.21	0.145	1.613	0.6579	High	33.09	33.43	0.236	2.618	0.8207	High	33.18	33.54	0.124	1.383	0.8356	High	33.04
ULK1c+NDP52	213	228	QCLTGKAPFQASSPQD	18.73	2	12	18.57	18.82	4.247	35.392	0.8979	High	18.5	18.86	4.139	34.49	0.8929	High	18.52	18.76	4.139	34.492	0.8908	High	18.42	18.61	5.529	46.078	0.8798	High	18.41	18.59	5.394	44.953	0.8417	High	18.23	18.45	5.441	45.342	0.7615	High	18.57	18.8	5.593	46.607	0.9204	High	18.4
ULK1c+NDP52	214	228	CLTGKAPFQASSPQD	18.49	2	11	18.19	18.38	3.914	35.584	0.8258	High	18.18	18.28	3.849	34.991	0.8989	High	18.03	18.26	3.8	34.55	0.8747	High	17.89	18.12	5.009	45.538	0.839	High	17.99	18.12	4.943	44.941	0.875	High	17.9	18.06	4.875	44.315	0.8509	High	18.22	18.37	5.314	48.308	0.8632	High	17.92
ULK1c+NDP52	216	228	TGKAPFQASSPQD	15.27	2	9	14.93	15.37	4.386	48.737	0.9072	High	14.79	15.39	4.333	48.143	0.9082	High	14.79	15.32	4.272	47.47	0.912	High	14.57	15.3	5.315	59.052	0.8907	High	14.52	15.34	5.299	58.883	0.9027	High	14.46	15.3	5.219	57.984	0.8921	High	15.33	15.55	5.43	60.328	0.9081	High	14.46
ULK1c+NDP52	216	231	TGKAPFQASSPQDLRL	23.31	2	12													23.1	23.27	4.19	34.92	0.7237	High	23.03	23.19	6.641	55.342	0.7987	High	22.99	23.08	6.678	55.648	0.7467	High	22.93	23.06	6.4	53.335	0.7334	High	23	23.24	7.642	63.686	0.83	High	22.95
ULK1c+NDP52	216	231	TGKAPFQASSPQDLRL	23.31	3	12	23.13	23.47	4.377	36.473	0.7255	High	23.15	23.45	4.296	35.797	0.7691	High	23.09	23.43	4.224	35.204	0.7349	High	22.87	23.27	6.743	56.188	0.8031	High	22.9	23.26	6.626	55.216	0.7497	High	22.91	23.23	6.556	54.635	0.756	High	23.06	23.22	7.746	64.554	0.7982	High	22.93
ULK1c+NDP52	232	255	FYEKNKTLVPTIPRETSAPLRQLL	26.73	2	19	26.39	26.72	7.492	39.433	0.9161	High	26.39	26.73	7.194	37.863	0.9217	High	26.33	26.87	6.998	36.832	0.9246	High	26.12	26.66	8.749	46.049	0.9119	High	26.24	26.41	8.612	45.325	0.9183	High	26.13	26.47	8.553	45.018	0.9183	High	26.25	26.67	9.654	50.809	0.9022	High	26.2
ULK1c+NDP52	232	255	FYEKNKTLVPTIPRETSAPLRQLL	26.73	3	19	26.34	26.72	7.599	39.995	0.9072	High	26.39	26.7	7.283	38.332	0.9044	High	26.37	26.73	7.168	37.725	0.9008	High	26.24	26.4	8.962	47.167	0.9022	High	26.18	26.34	8.932	47.008	0.9083	High	26.11	26.45	8.725	45.921	0.9071	High	26.31	26.61	9.95	52.367	0.9026	High	26.18
ULK1c+NDP52	232	255	FYEKNKTLVPTIPRETSAPLRQLL	26.73	4	19	26.35	26.72	7.77	40.897	0.9107	High	26.31	26.73	7.475	39.34	0.9041	High	26.25	26.85	7.409	38.993	0.9012	High	26.1	26.66	9.112	47.961	0.9002	High	26.08	26.52	9.009	47.417	0.9119	High	26.17	26.47	8.875	46.712	0.9073	High	26.31	26.63	10.131	53.321	0.9032	High	26.24
ULK1c+NDP52	232	255	FYEKNKTLVPTIPRETSAPLRQLL	26.73	5	19	26.39	26.68	7.29	38.367	0.8296	High	26.41	26.72	7.207	37.931	0.873	High	26.43	26.68	7.306	38.455	0.8574	High	26.26	26.44	8.895	46.817	0.9108	High	26.19	26.44	8.984	47.287	0.8779	High	26.17	26.42	8.597	45.249	0.8226	High	26.33	26.6	10.04	52.841	0.7535	High	26.2
ULK1c+NDP52	232	256	FYEKNKTLVPTIPRETSAPLRQLLL	28.67	3	20	28.05	28.33	7.659	38.293	0.8988	High	28.05	28.38	7.514	37.571	0.8733	High	28.09	28.38	7.382	36.911	0.9067	High	27.83	28.2	9.403	47.014	0.8792	High	27.85	28.15	9.099	45.494	0.8635	High	27.83	28.09	9.114	45.568	0.8958	High	28.05	28.26	9.993	49.966	0.8678	High	27.92
ULK1c+NDP52	232	256	FYEKNKTLVPTIPRETSAPLRQLLL	28.67	4	20	28.01	28.35	7.808	39.042	0.8276	High	28.07	28.29	7.359	36.796	0.8289	High	28	28.31	7.281	36.406	0.8112	High	27.8	28.15	9.175	45.877	0.8178	High	27.78	28.11	9.029	45.147	0.7824	High	27.78	28.12	9.25	46.252	0.8082	High	27.96	28.33	9.982	49.909	0.7514	High	27.89
ULK1c+NDP52	256	269	LALLQRNHKDRMDF	25.24	3	12	23.82	24.1	1.984	16.531	0.8244	High	23.9	24.06	1.952	16.269	0.8031	High	23.84	24.06	1.899	15.827	0.7808	High	23.61	23.79	2.439	20.324	0.7703	High	23.46	23.85	2.441	20.345	0.8005	High	23.64	23.68	2.486	20.713	0.6376	High	23.85	24	2.386	19.881	0.79	High	23.67
ULK1c+NDP52	256	271	LALLQRNHKDRMDFDE	23.15	3	14	22.84	22.97	1.868	13.343	0.7121	High	22.99	23.16	1.925	13.753	0.811	High	22.87	23.13	1.817	12.979	0.8345	High	22.67	23.03	2.771	19.793	0.8839	High	22.63	22.79	2.852	20.372	0.8947	High	22.76	22.89	2.858	20.417	0.7175	High	22.84	23.14	3.363	24.023	0.8337	High	22.64
ULK1c+NDP52	256	272	LALLQRNHKDRMDFDEF	26.46	3	15	26.3	26.53	2.669	17.792	0.841	High	26.27	26.54	2.489	16.594	0.8692	High	26.25	26.41	2.576	17.173	0.8147	High	26.09	26.29	3.002	20.016	0.8233	High	26.02	26.37	3.023	20.154	0.8553	High	26.04	26.26	2.913	19.422	0.8618	High	26.23	26.45	3.382	22.547	0.7248	High	26.09
ULK1c+NDP52	257	269	ALLQRNHKDRMDF	22.04	3	11	21.83	22.1	1.593	14.481	0.8085	High	21.53	22.54	1.624	14.766	0.9133	High	21.71	21.85	1.549	14.08	0.805	High	21.41	22.53	1.989	18.081	0.8959	High	21.58	21.66	1.996	18.143	0.8707	High	21.66	21.69	1.963	17.841	0.722	High	21.82	21.91	2.315	21.046	0.6248	High	21.5
ULK1c+NDP52	259	269	LQRNHKDRMDF	19.48	2	9	19.32	19.54	1.662	18.466	0.9488	High	19.26	19.42	1.539	17.094	0.9125	High	19.22	19.4	1.5	16.666	0.9379	High	19.07	19.23	1.788	19.867	0.9169	High	19.01	19.17	1.674	18.597	0.929	High	18.87	19.16	1.711	19.013	0.9084	High	19.43	19.49	2.079	23.098	0.8739	High	18.86
ULK1c+NDP52	259	269	LQRNHKDRMDF	19.48	3	9	19.34	19.61	1.573	17.478	0.9209	High	19.32	19.47	1.514	16.821	0.9057	High	19.29	19.38	1.378	15.314	0.9069	High	18.99	19.32	1.677	18.638	0.9249	High	18.99	19.28	1.627	18.077	0.9397	High	18.95	19.24	1.592	17.685	0.9349	High	19.21	19.32	2.052	22.801	0.9023	High	18.89
ULK1c+NDP52	259	271	LQRNHKDRMDFDE	18.94	2	11	18.65	18.81	1.978	17.984	0.8239	High	18.55	18.74	1.887	17.156	0.8391	High	18.48	18.61	1.875	17.043	0.8424	High	18.4	18.52	2.23	20.272	0.872	High	18.32	18.41	2.146	19.507	0.8653	High	18.24	18.36	2.095	19.042	0.8698	High	18.59	18.73	2.369	21.535	0.8496	High	18.25
ULK1c+NDP52	259	271	LQRNHKDRMDFDE	18.94	3	11	18.73	18.94	2.009	18.261	0.8545	High	18.4	18.91	1.948	17.706	0.8959	High	18.44	18.82	1.802	16.378	0.8893	High	18.26	18.62	2.277	20.703	0.8704	High	18.28	18.58	2.203	20.025	0.9151	High	18.19	18.55	2.136	19.416	0.909	High	18.67	18.88	2.463	22.392	0.8155	High	18.14
ULK1c+NDP52	259	272	LQRNHKDRMDFDEF	23.83	3	12	23.81	23.97	2.035	16.955	0.6958	High	23.62	23.87	2.043	17.023	0.8445	High	23.55	23.81	1.963	16.362	0.8122	High	23.4	23.66	2.523	21.027	0.827	High	23.38	23.57	2.505	20.877	0.8536	High	23.4	23.48	2.5	20.836	0.8616	High	23.66	23.71	2.63	21.918	0.73	High	23.48
ULK1c+NDP52	272	278	FFHHPFL	25.22	2	4	25.11	25.33	0.264	6.589	0.9401	High	25.1	25.39	0.278	6.948	0.9446	High	25.07	25.39	0.258	6.443	0.9374	High	24.9	25.2	0.539	13.473	0.9304	High	24.76	25.16	0.565	14.134	0.921	High	24.8	25.14	0.537	13.437	0.9214	High	25.25	25.81	0.65	16.255	0.8953	High	24.77
ULK1c+NDP52	273	278	FHHPFL	22.57	2	3	22.38	22.69	0.244	8.135	0.9416	High	22.37	22.68	0.239	7.951	0.9403	High	22.29	22.6	0.214	7.135	0.8737	High	22.13	22.42	0.513	17.086	0.9073	High	22.06	22.34	0.517	17.221	0.9187	High	22.08	22.25	0.52	17.321	0.9229	High	22.41	22.79	0.626	20.873	0.9102	High	22.02
ULK1c+NDP52	319	336	GEMQQLQKTLASPADTAG	24.29	2	15	23.45	23.62	3.978	26.521	0.8003	High	23.29	23.55	3.982	26.544	0.8876	High	23.27	23.55	3.945	26.297	0.8915	High	23.16	23.35	4.328	28.855	0.836	High	23.1	23.29	4.265	28.436	0.8759	High	23.06	23.28	4.17	27.801	0.7686	High	23.24	23.37	4.542	30.281	0.529	High	23.23
ULK1c+NDP52	324	336	LQKTLASPADTAG	14.98	2	10	14.75	14.94	6.127	61.269	0.8356	High	14.71	14.87	6.263	62.632	0.8476	High	14.79	14.82	6.142	61.424	0.8706	High	14.51	14.67	6.232	62.318	0.8987	High	14.48	14.62	6.22	62.201	0.8661	High	14.6	14.72	6.202	62.021	0.7863	High	14.66	15.11	6.145	61.447	0.8674	High	14.38
ULK1c+NDP52	357	368	FVMVPAQFPGDL	28.4	2	8	28.5	28.68	3.215	40.189	0.8634	High	26.95	28.88	3.178	39.726	0.9022	High	26.84	28.53	3.198	39.97	0.8987	High	26.89	28.78	3.417	42.714	0.9135	High	26.72	28.7	3.346	41.824	0.9005	High	26.63	28.63	3.364	42.05	0.8806	High	26.95	28.84	3.482	43.53	0.6543	High	26.62
ULK1c+NDP52	369	382	VAEAPSAKPPPDSL	16.92	2	8	16.81	17.04	5.357	66.963	0.9291	High	16.78	16.97	5.289	66.114	0.8858	High	16.62	16.84	5.233	65.413	0.8767	High	16.7	16.86	5.567	69.591	0.8842	High	16.6	16.76	5.463	68.293	0.9012	High	16.58	16.7	5.545	69.317	0.9043	High	16.79	16.96	5.573	69.668	0.9177	High	16.57
ULK1c+NDP52	369	383	VAEAPSAKPPPDSLM	18.84	2	9	19.15	19.27	5.709	63.435	0.8675	High	18.79	18.98	5.657	62.851	0.9116	High	18.65	18.88	5.581	62.006	0.9116	High	18.68	18.84	5.959	66.206	0.9161	High	18.65	18.81	5.901	65.567	0.9123	High	18.59	18.79	5.854	65.039	0.9033	High	18.76	19.07	6.025	66.939	0.9153	High	18.45
ULK1c+NDP52	371	383	EAPSAKPPPDSLM	19.03	2	7	18.23	18.57	4.872	69.593	0.8572	High	18.24	18.53	4.857	69.39	0.7949	High	18.16	18.57	4.871	69.585	0.9043	High	18.12	18.38	4.906	70.093	0.8322	High	18.23	18.36	4.94	70.572	0.8246	High	18.08	18.38	4.866	69.52	0.8389	High	18.21	18.63	4.944	70.626	0.784	High	18.06
ULK1c+NDP52	396	441	ESHGRTPSPSPPCSSSPSPSGRAGPFSSSRCGASVPIPVPTQVQNY	25.21	4	34	23.82	24.06	18.461	54.296	0.3042	High	23.69	24.16	18.648	54.846	0.6379	High	23.79	24.15	18.635	54.809	0.7104	High	23.7	23.9	20.739	60.996	0.7073	High	23.56	24.03	20.498	60.29	0.7484	High	23.59	24.01	20.724	60.954	0.5249	High	23.76	24.22	21.163	62.245	0.743	High	23.54
ULK1c+NDP52	442	453	QRIERNLQSPTQ	15.04	2	9	15.06	15.22	6.362	70.688	0.8703	High	14.83	14.98	6.308	70.09	0.9042	High	14.8	15.01	6.364	70.711	0.9091	High	14.88	14.95	6.55	72.781	0.8573	High	14.59	14.91	6.477	71.97	0.9081	High	14.58	14.95	6.528	72.539	0.9005	High	15.16	15.29	6.534	72.6	0.888	High	14.54
ULK1c+NDP52	454	461	FQTPRSSA	13.4	2	5	13.27	13.54	3.752	75.039	0.8528	High	13.15	13.31	3.687	73.731	0.8675	High	13.22	13.29	3.705	74.093	0.8985	High	13	13.24	3.802	76.04	0.9041	High	12.93	13.2	3.765	75.303	0.8832	High	12.84	13.06	3.727	74.531	0.8951	High	13.08	13.36	3.719	74.381	0.8952	High	12.79
ULK1c+NDP52	462	472	IRRSGSTSPLG	15.44	2	8	14.38	14.54	4.792	59.898	0.8248	High	14.13	14.42	4.735	59.183	0.8829	High	14.04	14.17	4.788	59.847	0.8085	High	14.13	14.21	4.893	61.158	0.8229	High	13.8	14.19	4.851	60.634	0.7715	High	13.8	14.18	4.825	60.308	0.6997	High	14.2	14.38	4.969	62.115	0.7701	High	13.91
ULK1c+NDP52	474	490	ARASPSPPAHAEHGGVL	17.48	2	12	16.73	17.02	5.678	47.319	0.9036	High	16.66	16.98	5.529	46.077	0.9079	High	16.62	16.82	5.378	44.818	0.8794	High	16.39	16.69	5.808	48.399	0.8623	High	16.32	16.61	5.784	48.202	0.8734	High	16.32	16.54	5.747	47.891	0.8474	High	16.69	16.83	5.548	46.236	0.7954	High	16.32
ULK1c+NDP52	474	490	ARASPSPPAHAEHGGVL	17.48	3	12	16.9	17.1	5.713	47.607	0.8295	High	16.62	17.08	5.503	45.861	0.8557	High	16.58	16.83	5.479	45.662	0.814	High	16.46	16.88	5.813	48.438	0.8882	High	16.45	16.74	5.737	47.806	0.8134	High	16.4	16.79	5.584	46.529	0.853	High	16.72	17.01	5.862	48.848	0.8207	High	16.44
ULK1c+NDP52	475	491	RASPSPPAHAEHGGVLA	17.05	2	12	16.73	17	5.579	46.491	0.8719	High	16.65	16.9	5.509	45.904	0.8972	High	16.65	16.77	5.44	45.331	0.886	High	16.48	16.69	5.808	48.402	0.8612	High	16.41	16.69	5.717	47.643	0.8697	High	16.34	16.55	5.735	47.793	0.8537	High	16.69	17.04	5.641	47.008	0.7891	High	16.43
ULK1c+NDP52	491	528	ARKMSLGGGRPYTPSPQVGTIPERPGWSGTPSPQGAEM	22.97	3	29							22.92	23.14	16.786	57.882	0.8924	High	22.76	23.23	16.495	56.879	0.8703	High	22.6	23.11	18.023	62.147	0.8208	High	22.51	23.1	17.72	61.104	0.8223	High	22.6	23.11	17.411	60.039	0.8225	High							22.74
ULK1c+NDP52	491	528	ARKMSLGGGRPYTPSPQVGTIPERPGWSGTPSPQGAEM	22.97	4	29							22.81	23.26	16.819	57.995	0.907	High	22.78	22.91	16.801	57.935	0.9183	High	22.72	22.95	18.076	62.33	0.8781	High	22.7	23.02	17.572	60.593	0.9003	High	22.48	22.9	17.519	60.411	0.9113	High							22.6
ULK1c+NDP52	529	550	RGGRSPRPGSSAPEHSPRTSGL	16.53	3	16	16.48	16.62	8.439	52.745	0.6203	High	16.22	16.44	8.429	52.679	0.7939	High	16.19	16.43	8.337	52.105	0.8168	High	16.01	16.32	8.753	54.707	0.8328	High	15.97	16.15	8.754	54.715	0.7278	High	15.85	16.39	8.657	54.104	0.6505	High	16.26	16.54	8.995	56.221	0.7502	High	15.95
ULK1c+NDP52	529	551	RGGRSPRPGSSAPEHSPRTSGLG	15.45	3	17	15.3	15.53	8.929	52.526	0.8508	High	15.18	15.41	9.105	53.56	0.8546	High	15.13	15.38	8.89	52.293	0.8955	High	14.96	15.25	9.361	55.062	0.9326	High	14.94	15.18	9.306	54.744	0.8894	High	14.9	15.03	9.172	53.955	0.8825	High	15.39	15.49	9.202	54.13	0.7938	High	14.89
ULK1c+NDP52	529	554	RGGRSPRPGSSAPEHSPRTSGLGCRL	20.47	3	20	20.16	20.35	10.78	53.902	0.742	High	20.15	20.36	10.785	53.924	0.7215	High	20.12	20.35	10.745	53.725	0.714	High	19.93	20.1	10.967	54.837	0.6871	High	19.87	20.13	10.676	53.38	0.7173	High	19.89	20.06	10.729	53.645	0.6886	High	20.01	20.39	10.85	54.248	0.7681	High	19.86
ULK1c+NDP52	529	554	RGGRSPRPGSSAPEHSPRTSGLGCRL	20.47	4	20	20.14	20.37	10.946	54.732	0.764	High	20.07	20.39	10.708	53.538	0.7916	High	20.1	20.35	10.703	53.514	0.7601	High	19.83	20.29	10.685	53.425	0.7272	High	19.85	20.12	10.606	53.029	0.7815	High	19.8	20.06	10.537	52.686	0.7843	High	20.13	20.32	10.792	53.96	0.5893	High	19.84
ULK1c+NDP52	555	563	HSAPNLSDL	21	2	6	20.86	20.93	3.544	59.059	0.8065	High	20.67	21	3.495	58.253	0.8104	High	20.64	20.78	3.518	58.629	0.8368	High	20.58	20.87	3.567	59.455	0.9072	High	20.52	20.86	3.53	58.834	0.8853	High	20.5	20.84	3.548	59.133	0.8717	High	20.81	20.97	3.484	58.062	0.8377	High	20.54
ULK1c+NDP52	564	580	HVVRPKLPKPPTDPLGA	21.55	3	10	21.25	21.6	6.208	62.08	0.8704	High	21.26	21.58	6.078	60.782	0.8185	High	21.48	21.5	6.163	61.633	0.8217	High	21.02	21.41	6.269	62.694	0.8706	High	20.98	21.34	6.317	63.172	0.8632	High	21.02	21.36	6.182	61.818	0.9053	High	21.33	21.48	6.295	62.948	0.8816	High	21.03
ULK1c+NDP52	581	598	VFSPPQASPPQPSHGLQS	18.36	2	11	18.3	18.5	6.13	55.727	0.7803	High	18.2	18.36	6.24	56.731	0.8352	High	18.21	18.36	6.091	55.372	0.8978	High	18.17	18.37	6.25	56.817	0.7997	High	18.07	18.37	6.205	56.411	0.8109	High	18.07	18.25	6.311	57.373	0.8005	High	18.4	18.53	6.288	57.168	0.868	High	18.1
ULK1c+NDP52	599	611	CRNLRGSPKLPDF	22.92	2	9	22.71	23.02	5.407	60.077	0.8648	High	22.94	23.02	5.492	61.02	0.7126	High	22.96	23.08	5.52	61.336	0.6521	High	22.66	22.71	5.482	60.908	0.876	High	22.46	22.76	5.457	60.634	0.8621	High	22.6	22.66	5.377	59.741	0.8375	High	22.68	22.97	5.46	60.666	0.8088	High	22.71
ULK1c+NDP52	599	611	CRNLRGSPKLPDF	22.92	3	9	22.7	23.09	5.484	60.935	0.9028	High	22.68	23	5.345	59.394	0.8979	High	22.66	22.73	5.338	59.314	0.8411	High	22.67	22.84	5.496	61.067	0.8983	High	22.38	22.85	5.419	60.215	0.8953	High	22.43	22.79	5.339	59.324	0.8525	High	22.67	22.98	5.544	61.602	0.8601	High	22.69
ULK1c+NDP52	612	642	LQRNPLPPILGSPTKAVPSFDFPKTPSSQNL	27.14	3	22	27.19	27.33	13.769	62.587	0.8065	High	26.83	27.05	13.242	60.191	0.8594	High	27.01	27.09	13.24	60.183	0.8901	High	27.11	27.22	13.681	62.188	0.7791	High	26.95	27.12	13.722	62.371	0.8938	High	26.82	26.99	13.614	61.881	0.8818	High	27.2	27.5	13.926	63.302	0.7955	High	26.97
ULK1c+NDP52	612	642	LQRNPLPPILGSPTKAVPSFDFPKTPSSQNL	27.14	4	22	26.89	27.16	13.946	63.39	0.866	High	26.94	27.15	13.522	61.461	0.791	High	27.05	27.17	13.472	61.238	0.7368	High	26.86	27.02	13.568	61.674	0.8376	High	26.81	26.97	13.587	61.759	0.7539	High	26.79	27	13.783	62.648	0.8326	High	26.99	27.11	13.707	62.303	0.737	High	26.81
ULK1c+NDP52	646	664	LARQGVVMTPPRNRTLPDL	23.09	3	14							22.85	23.03	9.242	66.016	0.9329	High	22.75	23.04	9.158	65.413	0.9263	High	22.71	22.87	9.882	70.587	0.928	High	22.6	22.9	9.705	69.322	0.9232	High	22.59	22.89	9.571	68.365	0.925	High	23.08	23.16	9.785	69.892	0.6966	High	22.62
ULK1c+NDP52	646	664	LARQGVVMTPPRNRTLPDL	23.09	4	14							22.83	22.96	9.31	66.496	0.8488	High	22.76	23.01	9.203	65.733	0.8713	High	22.67	22.95	9.601	68.58	0.7772	High	22.64	22.8	9.798	69.988	0.8867	High	22.59	22.8	9.708	69.346	0.8708	High	22.78	23.19	9.606	68.614	0.5289	High	22.7
ULK1c+NDP52	665	692	SEVGPFHGQPLGPGLRPGEDPKGPFGRS	24.26	3	20							24.22	24.38	10.268	51.339	0.879	High	24.15	24.38	10.147	50.736	0.8868	High	24.23	24.45	10.803	54.013	0.8856	High	24.09	24.16	10.746	53.731	0.8758	High	24.09	24.17	10.595	52.974	0.9105	High							23.99
ULK1c+NDP52	665	692	SEVGPFHGQPLGPGLRPGEDPKGPFGRS	24.26	4	20							24.14	24.37	10.463	52.315	0.8718	High	24.04	24.4	10.353	51.765	0.8592	High	24.19	24.31	11.069	55.345	0.881	High	23.94	24.15	10.993	54.965	0.8647	High	23.9	24.19	10.815	54.076	0.8718	High							23.94
ULK1c+NDP52	693	698	FSTSRL	18.17	2	4	18.02	18.27	2.854	71.361	0.8017	High	17.8	18.1	2.815	70.383	0.8129	High	17.76	18.01	2.795	69.868	0.8256	High	17.87	17.93	2.908	72.69	0.8657	High	17.56	17.98	2.903	72.575	0.8358	High	17.67	17.84	2.858	71.444	0.8123	High	17.83	17.92	3.012	75.299	0.8175	High	17.48
ULK1c+NDP52	703	720	LKAAFGTQAPDPGSTESL	21.23	2	14	20.95	21.21	6.189	44.21	0.6604	High	21.11	21.15	6.375	45.537	0.772	High	20.9	21.09	6.318	45.129	0.6954	High	20.8	21.1	7.065	50.465	0.6962	High	20.82	21	7.204	51.457	0.6403	High	20.76	21.09	7.247	51.767	0.6767	High	21	21.19	7.879	56.279	0.8748	High	20.77
ULK1c+NDP52	704	720	KAAFGTQAPDPGSTESL	19.84	2	13	19.68	19.98	7.112	54.71	0.8479	High	19.67	19.9	7.214	55.496	0.7403	High	19.6	19.86	7.158	55.062	0.7876	High	19.57	19.83	7.508	57.754	0.8446	High	19.53	19.77	7.492	57.627	0.821	High	19.41	19.86	7.486	57.586	0.8081	High	19.67	19.91	7.574	58.263	0.8781	High	19.51
ULK1c+NDP52	721	733	QEKPMEIAPSAGF	22.18	2	9							21.87	22.04	4.834	53.712	0.8238	High	21.87	22.05	4.848	53.864	0.7077	High	21.73	21.97	5.585	62.059	0.7897	High	21.68	21.92	5.656	62.842	0.652	High	21.75	21.84	5.693	63.256	0.8573	High	21.88	22.1	5.624	62.49	0.7636	High	21.61
ULK1c+NDP52	721	754	QEKPMEIAPSAGFGGSLHPGARAGGTSSPSPVVF	26.57	3	27	25.25	25.38	15.36	56.888	0.7742	High	25.28	25.58	15.37	56.927	0.9101	High	25.47	25.62	15.179	56.217	0.7729	High	25.39	25.63	15.93	58.999	0.6733	High	25.16	25.57	15.78	58.443	0.8403	High	25.1	25.54	15.837	58.657	0.7656	High	25.19	25.33	15.348	56.845	0.4978	High	25.22
ULK1c+NDP52	734	754	GGSLHPGARAGGTSSPSPVVF	21.49	2	16							21.18	21.4	8.898	55.613	0.8936	High	21.02	21.3	8.889	55.556	0.9119	High	21.13	21.16	9.562	59.765	0.8699	High	21	21.16	9.489	59.305	0.88	High	20.98	21.16	9.218	57.615	0.9007	High							20.9
ULK1c+NDP52	734	754	GGSLHPGARAGGTSSPSPVVF	21.49	3	16							21.16	21.32	8.963	56.019	0.8147	High	21.1	21.34	8.832	55.203	0.762	High	20.98	21.23	9.412	58.823	0.8628	High	20.92	21.15	9.578	59.86	0.8892	High	21	21.16	9.369	58.557	0.8779	High							20.92
ULK1c+NDP52	774	810	FSAGPTGSASSSARHLVPGPCSEAPAPELPAPGHGCS	21.97	3	28							21.73	22.23	12.966	46.307	0.9268	High	21.68	22.18	12.881	46.002	0.9195	High	21.59	22.09	14.088	50.314	0.9211	High	21.54	21.98	13.811	49.326	0.9122	High	21.61	21.99	13.394	47.834	0.918	High							21.61
ULK1c+NDP52	774	810	FSAGPTGSASSSARHLVPGPCSEAPAPELPAPGHGCS	21.97	4	28							21.77	21.97	13.091	46.752	0.7966	High	21.77	21.93	12.85	45.892	0.8282	High	21.69	21.92	13.673	48.833	0.8482	High	21.69	21.84	13.414	47.907	0.8697	High	21.56	22	13.243	47.297	0.8858	High							21.73
ULK1c+NDP52	811	819	FADPITANL	24.23	2	6	24.1	24.26	3.005	50.076	0.7446	High	23.92	24.18	3.032	50.537	0.8444	High	24.04	24.15	3.045	50.756	0.8584	High	24.05	24.23	3.016	50.262	0.1366	High	23.79	24.04	3.062	51.041	0.7738	High	23.74	24.03	3.125	52.09	0.8007	High	23.91	24.02	3.147	52.451	0.768	High	24
ULK1c+NDP52	836	844	MEQEHTEIL	20.74	2	7	20.68	20.83	4.875	69.639	0.7139	High	20.62	20.72	4.842	69.165	0.736	High	20.63	20.72	4.827	68.957	0.7572	High	20.46	20.78	5.222	74.597	0.6564	High	20.39	20.72	5.183	74.044	0.6962	High	20.4	20.62	5.265	75.209	0.7931	High	20.82	21.05	5.411	77.303	0.6445	High	20.35
ULK1c+NDP52	836	852	MEQEHTEILRGLRFTLL	30.03	3	15	29.67	29.99	3.009	20.063	0.849	High	29.73	29.89	3.146	20.971	0.8497	High	29.74	29.96	3.045	20.298	0.8117	High	29.59	29.78	5.17	34.468	0.8198	High	29.57	29.73	5.189	34.59	0.759	High	29.54	29.74	5.199	34.662	0.8128	High	29.64	30.06	6.821	45.474	0.7755	High	29.57
ULK1c+NDP52	839	883	EHTEILRGLRFTLLFVQHVLEIAALKGSASEAAGGPEYQLQESVV	28.83	6	42	28.52	28.6	15.847	37.731	0.6617	High	28.57	28.7	15.298	36.423	0.6529	High	28.5	28.68	15.574	37.08	0.6958	High							28.31	28.44	17.797	42.374	0.7298	High	28.33	28.43	17.846	42.49	0.5981	High	28.53	28.66	19.715	46.94	0.6644	High	28.49
ULK1c+NDP52	853	859	FVQHVLE	18.52	2	5	18.12	18.4	0.146	2.911	0.8777	High	18.1	18.31	0.123	2.462	0.8352	High	18.03	18.3	0.071	1.415	0.8267	High	17.98	18.05	0.165	3.292	0.7656	High	17.94	18	0.214	4.278	0.8776	High	17.91	17.97	0.139	2.774	0.8635	High	18.21	18.25	0.313	6.267	0.8417	High	18
ULK1c+NDP52	890	896	LSREWGF	26.43	2	5	24.78	25.3	1.297	25.941	0.8781	High	24.78	25.19	1.241	24.812	0.6968	High	24.97	25.11	1.294	25.873	0.8105	High	24.67	24.95	1.923	38.47	0.7064	High	24.6	25.06	1.887	37.74	0.773	High	24.63	24.99	1.899	37.987	0.838	High	24.79	25.26	2.611	52.226	0.6507	High	24.69
ULK1c+NDP52	903	909	YLKVAEL	22.59	2	5	22.14	22.28	0.067	1.341	0.6928	High	22.12	22.35	0.136	2.718	0.7684	High	22.24	22.36	0.099	1.981	0.7244	High	21.86	22.29	0.076	1.523	0.7073	High	22.01	22.06	0.072	1.441	0.6962	High	21.87	22.18	0.076	1.529	0.7103	High	22.08	22.45	0.05	0.998	0.6466	High	21.93
ULK1c+NDP52	910	926	LSSGLQSAIDQIRAGKL	28.87	3	15	28.39	28.72	0.471	3.138	0.7519	High	28.37	28.8	0.437	2.911	0.7206	High	28.37	28.76	0.484	3.228	0.8766	High	28.27	28.69	1.533	10.218	0.8776	High	28.11	29.25	1.516	10.11	0.8055	High	28.1	28.59	1.606	10.704	0.8423	High	28.3	29.5	4.342	28.95	0.6861	High	28.27
ULK1c+NDP52	927	942	CLSSTVKQVVRRLNEL	30.43	3	14	29.47	29.63	2.027	14.475	0.6757	High	29.48	29.6	1.893	13.519	0.6399	High	29.51	29.79	2.054	14.67	0.8766	High	29.23	29.4	2.799	19.993	0.7426	High	29.29	29.47	2.947	21.05	0.3707	High	29.23	29.58	2.823	20.166	0.7019	High	29.41	29.56	3.654	26.099	0.3586	High	29.29
ULK1c+NDP52	961	967	FLDKQRL	19.23	2	5	18.72	18.98	1.057	21.144	0.867	High	18.68	18.78	1.008	20.159	0.8538	High	18.69	18.85	1.072	21.442	0.893	High	18.55	18.62	1.694	33.878	0.8022	High	18.43	18.73	1.704	34.082	0.7985	High	18.56	18.69	1.7	34.005	0.826	High	18.8	18.94	2.763	55.261	0.7448	High	18.43
ULK1c+NDP52	980	986	IFSHAVQ	15.14	2	5	14.87	15.21	0.191	3.819	0.7959	High	14.73	15.31	0.274	5.483	0.8735	High	14.83	15.13	0.216	4.314	0.9186	High	14.59	15.12	0.341	6.812	0.8599	High	14.56	14.94	0.372	7.431	0.8682	High	14.37	15.1	0.324	6.476	0.8733	High	15.11	15.37	0.715	14.298	0.7199	High	14.52
ULK1c+NDP52	997	1012	FQHREGCVPRYHKALL	22.46	3	13	21.15	21.36	3.361	25.853	0.7845	High	21.01	21.37	3.245	24.964	0.9055	High	21.08	21.25	3.302	25.402	0.8043	High	20.61	21.15	4.183	32.175	0.8681	High	20.79	21.03	4.123	31.719	0.8816	High	20.8	21.08	3.952	30.401	0.8509	High							20.75
ULK1c+NDP52	997	1013	FQHREGCVPRYHKALLL	23.66	3	14	23.32	23.38	3.292	23.513	0.7209	High	23.32	23.75	3.215	22.965	0.9263	High	23.32	23.71	3.176	22.683	0.9095	High	23.03	23.21	4.18	29.859	0.8927	High	23.03	23.42	4.079	29.139	0.8783	High	23.02	23.31	4.072	29.089	0.8891	High	23.59	23.65	4.866	34.755	0.771	High	23.09
ULK1c+NDP52	997	1013	FQHREGCVPRYHKALLL	23.66	4	14	23.41	23.59	3.257	23.262	0.8792	High	23.3	23.75	3.382	24.154	0.9056	High	23.39	23.67	3.033	21.661	0.7659	High	23.15	23.2	4.132	29.514	0.7792	High	22.78	24.16	4.156	29.686	0.721	High	23.02	24.16	4.167	29.768	0.7203	High							22.94
ULK1c+NDP52	997	1014	FQHREGCVPRYHKALLLL	26.33	3	15	26.34	26.43	3.097	20.648	0.8837	High	26.1	26.46	3.014	20.095	0.8686	High	26.16	26.32	3.007	20.047	0.7836	High	26.08	26.34	3.889	25.927	0.6356	High	25.91	26.18	3.709	24.725	0.8647	High	25.9	26.05	3.834	25.559	0.7875	High	26.16	26.27	4.896	32.643	0.6859	High	25.95
ULK1c+NDP52	1045	1056	LTGICAHHHHHH	15.31	2	10	15.04	15.25	1.495	14.954	0.8261	High	15.01	15.09	1.41	14.1	0.8944	High	15.05	15.15	1.387	13.87	0.8706	High	14.47	14.77	1.865	18.651	0.8533	High	14.4	14.74	1.914	19.141	0.8971	High	14.5	14.64	1.82	18.205	0.9246	High	14.84	15.17	2.072	20.722	0.8631	High	14.38
ULK1c+NDP52	1045	1056	LTGICAHHHHHH	15.31	3	10	14.9	15.19	1.389	13.893	0.9016	High	14.92	15.15	1.434	14.344	0.8438	High	14.93	15.1	1.352	13.524	0.8454	High	14.48	14.64	1.858	18.584	0.8513	High	14.6	14.62	1.886	18.861	0.8138	High	14.39	14.74	1.773	17.731	0.8231	High	14.91	15.08	2.049	20.49	0.8983	High	14.55
ATG13							6s						6s						6s						60s						60s						60s						600s						600s
State	Start	End	Sequence	Search RT	Charge	Max D	Start RT	End RT	#D	%D	Score	Conf	Start RT	End RT	#D	%D	Score	Conf	Start RT	End RT	#D	%D	Score	Conf	Start RT	End RT	#D	%D	Score	Conf	Start RT	End RT	#D	%D	Score	Conf	Start RT	End RT	#D	%D	Score	Conf	Start RT	End RT	#D	%D	Score	Conf	Start RT
ULK1c	6	16	NSQDRKDLDKF	18.64	2	9	18.57	18.82	2.696	29.952	0.8943	High	18.42	18.6	2.512	27.912	0.8845	High	18.39	18.67	2.59	28.782	0.8824	High	18.14	18.31	3.458	38.427	0.8738	High	18.19	18.55	3.582	39.801	0.8395	High	18.19	18.48	3.58	39.781	0.8703	High	18.38	18.57	4.428	49.195	0.8345	High	17.99
ULK1c	6	16	NSQDRKDLDKF	18.64	3	9	18.65	18.79	2.794	31.044	0.9027	High	18.4	18.69	2.614	29.044	0.8939	High	18.4	18.71	2.651	29.46	0.9015	High	18.14	18.39	3.498	38.869	0.8509	High	18.29	18.54	3.785	42.05	0.8552	High	18.32	18.53	3.634	40.378	0.862	High	18.49	18.64	4.73	52.559	0.881	High	18.18
ULK1c	20	26	FALKTVQ	18.18	2	5	18.04	18.28	0.021	0.412	0.8529	High	18.07	18.35	0.039	0.786	0.8998	High	17.99	18.43	0.017	0.34	0.8769	High	18.01	18.2	0.037	0.733	0.8969	High	17.91	18.17	0.021	0.427	0.8795	High	17.92	18.19	0.027	0.534	0.8894	High	17.89	18.2	0.026	0.515	0.8825	High	17.75
ULK1c	31	39	ARLGEKICT	17.19	2	7	17.05	17.21	1.888	26.965	0.883	High	17.01	17.28	1.83	26.141	0.8824	High	16.95	17.23	1.801	25.732	0.8802	High	16.84	17.11	2.66	38.002	0.9013	High	16.84	17.07	2.734	39.057	0.8741	High	16.88	17.04	2.711	38.736	0.8782	High	16.91	17.24	4.035	57.646	0.8383	High	16.63
ULK1c	40	50	RSSSSPTGSDW	17.88	2	8	17.31	17.72	4.144	51.797	0.8165	High	17.83	17.93	4.031	50.387	0.8784	High	17.52	17.81	4.113	51.416	0.8853	High	17.57	17.95	4.16	51.996	0.8695	High	17.32	17.96	4.218	52.729	0.8775	High	17.2	17.89	4.157	51.968	0.8434	High	17.35	17.55	4.233	52.915	0.7887	High	17.4
ULK1c	54	64	AIKDIPEVTHE	18.38	2	8	18.22	18.36	2.178	27.22	0.8036	High	18.07	18.12	2.192	27.403	0.714	High	18.03	18.23	2.083	26.038	0.8287	High	18.24	18.43	3.005	37.566	0.7752	High	18.09	18.16	3.19	39.877	0.8347	High	17.98	18.27	3.069	38.359	0.8884	High	18.08	18.27	4.302	53.776	0.5912	High	17.96
ULK1c	54	73	AIKDIPEVTHEAKKALAGQL	24.94	3	17	24.6	24.76	3.944	23.198	0.8449	High	24.57	24.66	3.737	21.981	0.8249	High	24.58	24.77	3.668	21.576	0.8905	High	24.51	24.66	5.628	33.103	0.853	High	24.35	24.64	5.892	34.658	0.903	High	24.4	24.61	5.72	33.649	0.8029	High	24.36	24.59	9.765	57.443	0.8228	High	24.15
ULK1c	54	80	AIKDIPEVTHEAKKALAGQLPAVGRSM	25.26	3	23	25.26	25.39	5.483	23.838	0.7263	High	25.09	25.49	5.093	22.145	0.8444	High	25.06	25.42	5.116	22.242	0.8076	High	25.11	25.34	8.026	34.894	0.8375	High	24.96	25.17	8.438	36.685	0.8303	High	24.98	25.16	8.432	36.661	0.8251	High	24.98	25.18	12.418	53.992	0.8172	High	24.83
ULK1c	54	81	AIKDIPEVTHEAKKALAGQLPAVGRSMC	25.62	3	24	25.72	25.85	5.704	23.767	0.8911	High	25.6	25.72	5.435	22.645	0.9296	High	25.56	25.85	5.468	22.783	0.9314	High	25.46	25.63	8.519	35.498	0.9241	High	25.57	25.6	8.502	35.424	0.9005	High	25.41	25.58	8.733	36.389	0.9346	High	25.48	25.7	12.41	51.707	0.8994	High	25.16
ULK1c	54	81	AIKDIPEVTHEAKKALAGQLPAVGRSMC	25.62	4	24	25.65	25.82	5.917	24.652	0.8527	High	25.54	25.81	5.383	22.431	0.8166	High	25.52	25.8	5.687	23.694	0.835	High	25.41	25.84	8.092	33.717	0.8552	High	25.5	25.71	8.309	34.621	0.878	High	25.47	25.63	8.36	34.834	0.8717	High	25.39	25.64	12.544	52.267	0.7849	High	25.13
ULK1c	54	83	AIKDIPEVTHEAKKALAGQLPAVGRSMCVE	26.03	3	26	25.83	26.02	5.953	22.898	0.9305	High	25.81	26.13	5.291	20.351	0.9185	High	25.81	26.17	5.521	21.234	0.9245	High	25.75	26.11	8.288	31.878	0.92	High	25.6	25.89	8.804	33.863	0.9036	High	25.59	25.94	8.829	33.958	0.9249	High	25.6	25.94	13.06	50.231	0.8907	High	25.49
ULK1c	54	83	AIKDIPEVTHEAKKALAGQLPAVGRSMCVE	26.03	4	26	25.87	26.13	5.925	22.79	0.9233	High	25.84	26.05	5.56	21.384	0.9127	High	25.78	26.07	5.651	21.735	0.9218	High	25.72	26.02	8.782	33.778	0.8538	High	25.69	25.86	9.264	35.631	0.8316	High	25.68	25.9	8.811	33.888	0.8699	High	25.65	25.86	12.867	49.488	0.8142	High	25.51
ULK1c	84	95	ISLKTSEGDSME	18.23	2	10	18.17	18.2	3.176	31.76	0.8567	High	18.03	18.14	3.037	30.367	0.9164	High	17.99	18.2	3.12	31.198	0.8954	High	17.96	17.99	3.807	38.068	0.795	High	17.87	18.09	3.884	38.842	0.8731	High	17.93	18.23	3.898	38.979	0.874	High	17.84	18.23	3.964	39.637	0.8477	High	17.8
ULK1c	124	129	LLKSLL	23.46	2	4	23.12	23.39	-0.004	-0.091	0.8006	High	23.12	23.44	-0.005	-0.135	0.7938	High	23.09	23.41	0.007	0.165	0.8005	High	23.02	23.37	0.009	0.223	0.8002	High	22.97	23.27	0	0.005	0.6559	High	22.96	23.25	0.024	0.609	0.818	High	23.12	23.25	0.023	0.566	0.8244	High	22.84
ULK1c	130	147	AITRVTPAYRLSRKQGHE	18.47	2	15	18.15	18.27	2.315	15.432	0.7884	High	18.14	18.4	2.124	14.163	0.8568	High	18.08	18.5	2.27	15.136	0.8346	High	18.02	18.51	3.225	21.497	0.8718	High	17.95	18.04	3.453	23.02	0.9171	High	17.89	18.31	3.395	22.631	0.8445	High	17.84	18.08	4.156	27.709	0.7738	High	17.81
ULK1c	130	147	AITRVTPAYRLSRKQGHE	18.47	3	15	18.06	18.53	2.448	16.32	0.906	High	17.97	18.56	2.071	13.807	0.905	High	17.99	18.62	2.212	14.749	0.9155	High	17.96	18.48	3.214	21.427	0.9112	High	17.81	18.36	3.351	22.341	0.9231	High	17.8	18.39	3.294	21.96	0.9197	High	17.81	18.08	4.259	28.395	0.9019	High	17.77
ULK1c	130	151	AITRVTPAYRLSRKQGHEYVIL	24.28	3	19	24.12	24.42	2.617	13.774	0.8938	High							24.21	24.27	2.604	13.703	0.8174	High	24.11	24.24	3.319	17.467	0.8319	High	23.95	24.11	3.225	16.975	0.7318	High	23.81	23.97	3.285	17.292	0.6411	High	23.93	24.01	4.266	22.451	0.7966	High	23.89
ULK1c	131	147	ITRVTPAYRLSRKQGHE	17.93	3	14	17.7	17.94	2.398	17.127	0.9017	High	17.67	18.01	2.203	15.734	0.8794	High	17.62	17.85	2.29	16.356	0.9415	High	17.48	17.68	3.124	22.313	0.9	High	17.35	17.78	3.234	23.098	0.8766	High	17.43	17.65	3.355	23.968	0.834	High	17.56	17.67	4.117	29.404	0.8507	High	17.33
ULK1c	152	158	YRIYFGE	23.38	2	5	23.03	23.58	0.595	11.901	0.9103	High	23.17	23.23	0.523	10.456	0.9174	High	23.05	23.53	0.546	10.925	0.9201	High	22.87	22.95	1.229	24.572	0.8731	High	22.93	23.4	1.251	25.019	0.9124	High	22.94	23.47	1.242	24.84	0.9159	High	23.36	23.44	1.953	39.052	0.7963	High	22.79
ULK1c	152	161	YRIYFGEVQL	28.51	2	8	28.32	28.38	2.426	30.323	0.8231	High	28.28	28.58	2.316	28.95	0.8875	High	28.21	28.61	2.297	28.717	0.8708	High	28.2	28.26	3.087	38.587	0.7239	High	28.23	28.51	3.198	39.976	0.8755	High	28.16	28.46	3.075	38.434	0.8831	High	28.33	28.54	4.142	51.774	0.8125	High	28
ULK1c	159	182	VQLSGLGEGFQTVRVGTVGTPVGT	25.27	2	21							25.14	25.23	6.559	31.235	0.6912	High	25.17	25.26	6.616	31.505	0.6839	High	24.93	25.16	7.946	37.837	0.8064	High	24.86	25.25	7.841	37.34	0.6894	High	25.05	25.28	8.117	38.653	0.8005	High	24.92	25.17	8.995	42.833	0.7293	High	24.87
ULK1c	162	182	SGLGEGFQTVRVGTVGTPVGT	23.22	2	18	23.18	23.25	5.124	28.467	0.7056	High	23.04	23.34	4.941	27.451	0.8777	High	23.01	23.25	4.832	26.845	0.8524	High	23.08	23.24	6.088	33.821	0.8179	High	22.85	23.18	6.362	35.343	0.8557	High	22.92	23.16	6.41	35.611	0.8392	High	22.98	23.01	6.976	38.758	0.7044	High	22.82
ULK1c	162	185	SGLGEGFQTVRVGTVGTPVGTITL	29.02	2	21	28.84	28.94	4.358	20.751	0.8432	High	28.9	29.27	4.179	19.9	0.8505	High	28.91	29.36	4.297	20.462	0.8254	High	28.92	29.24	5.082	24.2	0.8685	High	28.77	29.1	5.33	25.381	0.8056	High	28.76	29.12	5.312	25.295	0.8739	High	28.88	28.98	6.258	29.8	0.7921	High	28.74
ULK1c	165	182	GEGFQTVRVGTVGTPVGT	21.2	2	15	21.58	21.64	2.843	18.951	0.8402	High	21.45	21.59	2.766	18.442	0.8295	High	21.31	21.41	2.72	18.135	0.8255	High	21.3	21.41	3.433	22.885	0.81	High	21.21	21.31	3.542	23.613	0.5578	High	21.24	21.39	3.569	23.791	0.8577	High	21.41	21.53	4.759	31.728	0.8139	High	21.17
ULK1c	165	185	GEGFQTVRVGTVGTPVGTITL	28.19	2	18	27.97	28.14	3.221	17.892	0.814	High	27.79	27.9	3.116	17.311	0.6832	High	27.86	28.21	3.034	16.858	0.8805	High	27.78	28.01	3.95	21.947	0.8649	High	27.74	28.05	4.214	23.412	0.8732	High	27.81	28.03	4.236	23.535	0.8741	High	27.79	27.98	5.33	29.612	0.8005	High	27.66
ULK1c	169	185	QTVRVGTVGTPVGTITL	26.4	2	14	26.13	26.42	1.8	12.858	0.834	High	26.32	26.4	1.603	11.452	0.8021	High	26.19	26.38	1.662	11.875	0.872	High	26.2	26.25	2.126	15.188	0.878	High	26.1	26.21	2.188	15.627	0.7968	High	26	26.17	2.191	15.647	0.8408	High	26.13	26.25	2.907	20.764	0.7637	High	26.07
ULK1c	171	185	VRVGTVGTPVGTITL	26.24	2	12	26.04	26.17	1.169	9.745	0.7849	High	26.02	26.16	1.104	9.198	0.8652	High	26.05	26.16	1.089	9.079	0.8883	High	25.93	26.14	1.647	13.725	0.7998	High	25.96	26.05	1.839	15.325	0.7814	High	25.9	26.08	1.765	14.706	0.8041	High							25.92
ULK1c	188	195	AYRINLAF	26.59	2	6	26.22	26.66	3.19	53.166	0.7452	High	26.21	26.38	3.126	52.105	0.748	High	26.18	26.41	3.195	53.244	0.8531	High	26.15	26.44	3.67	61.159	0.8224	High	26.08	26.52	3.713	61.881	0.8017	High	26.09	26.67	3.752	62.534	0.8712	High	26.05	26.61	3.995	66.59	0.7822	High	25.96
ULK1c	189	195	YRINLAF	26.54	2	5	26.5	26.62	2.961	59.221	0.699	High	26.26	26.57	2.936	58.726	0.8599	High	26.22	26.49	2.971	59.43	0.8185	High	26.39	26.55	3.63	72.604	0.8401	High	26.07	26.56	3.658	73.152	0.8709	High	26.12	26.53	3.672	73.431	0.8608	High	26.02	26.53	3.824	76.482	0.8123	High	26.18
ULK1c	199	209	RQFERTPPIMG	19.72	2	7	18.8	19	4.343	62.043	0.8447	High	18.75	18.89	4.271	61.019	0.8982	High	18.77	19	4.315	61.636	0.8848	High	18.67	18.7	5.61	80.142	0.7833	High	18.61	18.86	5.639	80.559	0.8699	High	18.7	18.92	5.715	81.645	0.8817	High	18.36	19.07	6.079	86.849	0.5533	High	18.53
ULK1c	201	208	FERTPPIM	20.01	2	4	19.89	19.97	2.69	67.259	0.8308	High	19.56	19.93	2.7	67.49	0.8335	High	19.6	19.92	2.696	67.401	0.8322	High	19.56	19.57	2.873	71.83	0.7142	High	19.46	19.74	2.891	72.287	0.8331	High	19.56	19.68	2.91	72.751	0.8564	High	19.49	19.67	2.903	72.568	0.8204	High	19.39
ULK1c	201	209	FERTPPIMG	19.31	2	5	19.22	19.41	3.101	62.029	0.837	High	19.02	19.34	3.14	62.802	0.8625	High	18.97	19.32	3.122	62.433	0.8484	High	18.99	19.06	3.296	65.914	0.7882	High	18.84	19.2	3.289	65.771	0.8667	High	18.84	19.05	3.326	66.517	0.8032	High	19.19	19.35	3.418	68.357	0.5468	High	18.97
ULK1c	209	215	GIIIDHF	24.11	2	5	24.13	24.23	2.609	52.172	0.7355	High	23.87	24.18	2.573	51.457	0.8423	High	23.88	24.21	2.584	51.67	0.8474	High	23.83	23.87	2.785	55.705	0.7925	High	23.73	24.07	2.803	56.069	0.8882	High	23.73	24.09	2.765	55.296	0.8523	High	23.81	23.96	2.852	57.032	0.8683	High	23.76
ULK1c	209	230	GIIIDHFVDRPYPSSSPMHPCN	24.88	2	16							24.77	24.89	7.823	48.895	0.769	High	24.73	24.85	8.29	51.814	0.8289	High							24.56	24.88	9.068	56.677	0.7818	High	24.62	24.79	8.921	55.755	0.6544	High							24.25
ULK1c	209	230	GIIIDHFVDRPYPSSSPMHPCN	24.88	3	16							24.57	24.97	8.017	50.106	0.9012	High	24.55	25.02	8.203	51.271	0.9037	High							24.43	24.85	9.004	56.273	0.9126	High	24.41	24.87	8.81	55.063	0.8731	High	24.71	24.79	8.763	54.77	0.7818	High	24.49
ULK1c	210	215	IIIDHF	22.8	2	4	22.95	23.09	1.842	46.061	0.8281	High	22.6	22.69	1.834	45.856	0.7775	High	22.51	22.92	1.844	46.089	0.8656	High	22.61	22.64	1.908	47.688	0.8264	High	22.7	22.83	1.945	48.618	0.8337	High	22.44	22.88	1.931	48.273	0.876	High	22.67	22.9	1.99	49.762	0.8315	High	22.6
ULK1c	210	230	IIIDHFVDRPYPSSSPMHPCN	23.77	2	15							23.46	23.81	7.078	47.189	0.8229	High	23.62	23.74	7.369	49.126	0.8897	High	23.41	23.55	7.265	48.432	0.7953	High	23.47	23.81	7.82	52.131	0.9017	High													23.25
ULK1c	210	230	IIIDHFVDRPYPSSSPMHPCN	23.77	3	15							23.4	23.79	6.986	46.574	0.8642	High	23.53	23.69	7.093	47.287	0.9097	High	23.36	23.62	7.51	50.065	0.8829	High	23.48	23.62	7.588	50.586	0.8614	High	23.48	23.72	7.577	50.514	0.9092	High							23.18
ULK1c	216	230	VDRPYPSSSPMHPCN	17.32	2	9	17.17	17.2	5.359	59.54	0.8374	High	17.09	17.21	5.284	58.713	0.8061	High	17.27	17.32	5.258	58.425	0.8658	High	16.93	17.13	5.408	60.09	0.8776	High							17.06	17.35	5.397	59.97	0.9011	High	17.38	17.52	5.475	60.834	0.8574	High	17.08
ULK1c	216	230	VDRPYPSSSPMHPCN	17.32	3	9							17.15	17.33	5.247	58.304	0.8058	High	17.15	17.32	5.387	59.859	0.8567	High	17	17.39	5.459	60.659	0.8699	High	17.3	17.46	5.555	61.719	0.8268	High													16.81
ULK1c	231	246	YRTAGEDTGVIYPSVE	20.99	2	13							20.22	20.35	7.452	57.32	0.8945	High	20.16	20.48	7.442	57.243	0.9087	High	19.97	20.14	7.907	60.823	0.8032	High	20.26	20.42	7.901	60.774	0.9101	High	20.25	20.41	7.847	60.358	0.9087	High							19.99
ULK1c	231	250	YRTAGEDTGVIYPSVEDSQE	20.4	2	17	20.26	20.41	9.654	56.787	0.8445	High							20.36	20.4	9.585	56.383	0.6749	High							20.18	20.3	9.836	57.858	0.7834	High	20.14	20.3	9.827	57.808	0.8704	High	20.24	20.28	9.872	58.072	0.6795	High	19.91
ULK1c	257	264	STSPPSQL	14.54	2	4	14.3	14.52	1.353	33.837	0.7793	High	14.1	14.72	1.354	33.841	0.7751	High	14.12	14.43	1.312	32.793	0.8179	High	14.03	14.43	1.391	34.771	0.8233	High	14.02	14.28	1.347	33.687	0.8936	High	13.97	14.22	1.355	33.887	0.8572	High	14	14.05	1.431	35.77	0.7026	High	14.1
ULK1c	270	282	SYQPAALGVGSAD	18.16	2	10	17.92	18.19	3.718	37.177	0.8202	High	17.72	18.21	3.544	35.435	0.8703	High	17.6	18.2	3.652	36.515	0.8189	High	17.63	17.73	3.906	39.056	0.6724	High	17.87	18.19	3.87	38.697	0.8832	High	17.61	18.09	3.84	38.399	0.8553	High	17.78	18.07	3.871	38.706	0.8824	High	17.44
ULK1c	290	328	AAGLNATHPHQLMVPGKEGGVPLAPNQPVHGTQADQERL	22.49	3	32							22.22	22.51	16.252	50.789	0.9038	High	22.2	22.37	16.826	52.582	0.9309	High							22.04	22.23	18.221	56.94	0.9037	High	22.07	22.26	18.263	57.072	0.9092	High							21.94
ULK1c	290	328	AAGLNATHPHQLMVPGKEGGVPLAPNQPVHGTQADQERL	22.49	4	32							22.13	22.53	16.305	50.953	0.9284	High	22.13	22.62	16.872	52.726	0.9382	High							21.98	22.34	18.254	57.042	0.9263	High	21.97	22.46	18.092	56.536	0.939	High							21.88
ULK1c	290	328	AAGLNATHPHQLMVPGKEGGVPLAPNQPVHGTQADQERL	22.49	5	32							22.16	22.38	16.421	51.315	0.9092	High	22.03	22.6	16.959	52.998	0.9148	High							21.93	22.4	18.142	56.695	0.9027	High	22.07	22.24	17.984	56.201	0.8895	High							21.95
ULK1c	329	347	ATCTPSDRTHCAATPSSSE	13.23	2	15	13.26	13.44	8.263	55.084	0.8189	High	13.19	13.27	7.886	52.573	0.8846	High	12.85	13.35	8.199	54.658	0.9049	High	12.72	13.17	8.32	55.47	0.9203	High	12.73	13.21	8.352	55.679	0.9046	High	12.86	13.18	8.489	56.593	0.8903	High							12.64
ULK1c	329	347	ATCTPSDRTHCAATPSSSE	13.23	3	15							13.18	13.28	7.827	52.182	0.8069	High	12.9	13.38	8.029	53.528	0.8918	High	12.79	13.25	8.096	53.974	0.9106	High	12.87	13.26	8.428	56.186	0.8426	High	12.88	13.26	8.627	57.515	0.8828	High							12.76
ULK1c	329	351	ATCTPSDRTHCAATPSSSEDTET	14.35	2	19													13.99	14.2	9.951	52.375	0.7403	High	13.98	14.2	10.058	52.938	0.9062	High	13.99	14.29	10.834	57.021	0.7997	High	13.99	14.29	10.547	55.508	0.8555	High							13.79
ULK1c	329	351	ATCTPSDRTHCAATPSSSEDTET	14.35	3	19							14.14	14.32	10.05	52.896	0.7582	High	14.05	14.23	10.191	53.639	0.8521	High	13.91	14.22	10.372	54.592	0.8795	High	13.97	14.31	10.48	55.157	0.8585	High	14.04	14.37	10.482	55.168	0.859	High							13.84
ULK1c	329	366	ATCTPSDRTHCAATPSSSEDTETVSNSSEGRASPHDVL	19.81	3	33							19.4	19.77	15.543	47.1	0.8139	High	19.42	19.82	16.082	48.732	0.8072	High	19.36	19.61	16.129	48.875	0.8033	High	19.28	19.66	17.365	52.62	0.8006	High	19.26	19.69	17.16	51.999	0.7687	High							19.16
ULK1c	329	366	ATCTPSDRTHCAATPSSSEDTETVSNSSEGRASPHDVL	19.81	4	33							19.54	19.76	15.218	46.114	0.8075	High	19.47	19.7	15.923	48.252	0.8522	High	19.29	19.72	16.22	49.152	0.8213	High	19.3	19.64	17.092	51.793	0.8306	High	19.23	19.7	17.155	51.985	0.8397	High							19.12
ULK1c	348	366	DTETVSNSSEGRASPHDVL	18.82	2	16	18.32	18.39	9.381	58.632	0.6566	High	18.11	18.39	9.141	57.131	0.7502	High	18.19	18.61	9.248	57.803	0.7798	High	18.31	18.63	9.142	57.14	0.6679	High	18.18	18.49	9.32	58.247	0.7965	High	18.09	18.54	9.165	57.284	0.8415	High	18.11	18.49	9.598	59.989	0.8079	High	18.12
ULK1c	352	366	VSNSSEGRASPHDVL	17.6	2	12							17.36	17.56	5.809	48.404	0.8154	High	17.37	17.47	5.766	48.052	0.8443	High	17.19	17.25	6.135	51.129	0.7421	High	17.15	17.28	6.134	51.118	0.7	High	17.27	17.47	5.963	49.688	0.8649	High	17.17	17.26	6.251	52.095	0.4969	High	17.08
ULK1c	369	377	IFVRKVGAF	22.08	2	7	21.96	22	4.17	59.578	0.8695	High	21.96	22.01	4.119	58.844	0.7731	High	21.92	22.01	4.109	58.696	0.6002	High	21.88	21.92	4.718	67.407	0.8167	High	21.76	21.85	4.821	68.877	0.8	High	21.79	21.82	4.733	67.613	0.7137	High	21.74	21.9	5.264	75.205	0.6822	High	21.61
ULK1c	371	377	VRKVGAF	17.59	2	5	17.49	17.62	2.876	57.52	0.8833	High	17.52	17.6	2.834	56.688	0.8323	High	17.35	17.54	2.826	56.528	0.8564	High							17.13	17.37	3.283	65.661	0.8869	High	17.13	17.37	3.27	65.408	0.8305	High	17.42	17.46	3.474	69.482	0.8019	High	17.24
ULK1c	371	384	VRKVGAFVNKPINQ	18.26	2	11	17.65	18.01	6.409	58.267	0.8303	High	17.68	17.79	6.295	57.229	0.8263	High	17.67	17.78	6.204	56.404	0.838	High	17.57	17.82	7.045	64.043	0.8877	High	17.64	17.77	7.198	65.432	0.855	High	17.48	17.78	7.116	64.687	0.9103	High	17.62	17.79	7.545	68.589	0.8704	High	17.36
ULK1c	377	384	FVNKPINQ	13.01	2	5	13.03	13.33	3.411	68.214	0.8408	High	12.73	12.92	3.38	67.603	0.8116	High	12.57	12.77	3.413	68.262	0.7973	High	12.49	12.67	3.398	67.954	0.8402	High	12.55	13.17	3.432	68.646	0.8725	High	12.54	13.13	3.456	69.126	0.8778	High	12.56	13.18	3.419	68.387	0.8556	High	12.33
ULK1c	377	387	FVNKPINQVTL	21.59	2	8	21.29	21.45	5.653	70.661	0.8066	High	21.26	21.47	5.576	69.702	0.7415	High	21.41	21.47	5.495	68.693	0.7742	High	21.2	21.25	5.681	71.01	0.7533	High	21.13	21.37	5.637	70.46	0.6177	High	21.26	21.36	5.662	70.778	0.6891	High	21.16	21.39	5.716	71.446	0.7621	High	20.99
ULK1c	378	384	VNKPINQ	10.26	2	4	10.23	10.43	2.969	74.222	0.7482	High	10.32	10.53	2.94	73.511	0.8385	High	10.34	10.44	2.918	72.947	0.6981	High	10.13	10.48	2.915	72.873	0.6924	High	10.27	10.48	2.963	74.072	0.7146	High	10.15	10.41	2.905	72.625	0.6942	High	10.2	10.5	3.03	75.747	0.5076	High
ULK1c	388	397	TSLDIPFAMF	31.57	2	7	31.79	32.11	2.514	35.908	0.8532	High	31.35	31.46	2.464	35.201	0.8472	High	31.34	32.19	2.433	34.753	0.9111	High	31.24	31.42	2.809	40.134	0.8948	High	31.25	32.28	2.927	41.82	0.8918	High	31.33	32.09	2.869	40.987	0.9049	High	32.15	32.34	3.179	45.42	0.7619	High	31.18
ULK1c	397	404	FAPKNLEL	22.6	2	5	22.29	22.47	3.734	74.675	0.8378	High	22.36	22.44	3.691	73.82	0.7502	High	22.32	22.54	3.687	73.743	0.8629	High	22.26	22.39	3.743	74.862	0.7105	High	22.39	22.66	3.774	75.475	0.9122	High	22.3	22.46	3.711	74.229	0.8604	High	22.19	22.48	3.924	78.475	0.9067	High
ULK1c	398	404	APKNLEL	19.12	2	5	18.59	18.88	3.446	68.928	0.7497	High	18.81	18.97	3.408	68.159	0.8438	High	18.85	19.06	3.393	67.867	0.8634	High	18.71	18.82	3.473	69.456	0.8654	High	18.63	19.18	3.465	69.294	0.8729	High	18.66	19.22	3.499	69.989	0.8478	High	18.68	19.18	3.532	70.633	0.8657	High	18.56
ULK1c	405	427	EDTDPMVNPPDSPETESPLQGSL	23.7	2	16							23.4	23.52	6.815	42.594	0.8472	High	23.62	23.78	6.757	42.234	0.8793	High	23.08	23.29	7.338	45.863	0.6792	High	23.3	23.73	7.609	47.558	0.9049	High	23.15	23.77	7.475	46.721	0.8963	High							23.53
ULK1c	428	444	HSDGSSGGSSGNTHDDF	15.17	2	15							15.14	15.23	4.628	30.851	0.7788	High	14.9	15.14	4.957	33.048	0.8283	High	14.63	14.87	4.929	32.859	0.8294	High	14.77	14.95	5.215	34.769	0.8439	High	14.78	14.9	5.081	33.871	0.8364	High	14.7	14.86	5.218	34.787	0.7432	High	14.6
ULK1c	428	444	HSDGSSGGSSGNTHDDF	15.17	3	15	14.95	15.25	5.025	33.5	0.8469	High	14.89	15.26	4.733	31.553	0.7394	High	14.75	15.34	4.645	30.963	0.8441	High	14.56	15.12	5.242	34.944	0.8035	High	14.62	15.21	5.328	35.519	0.8409	High	14.69	15.11	5.386	35.905	0.8526	High	14.66	15.29	4.867	32.445	0.6069	High	14.51
ULK1c	445	453	VMIDFKPAF	26.7	2	6	26.35	26.77	3.381	56.345	0.7644	High	26.53	26.73	3.371	56.183	0.797	High	26.48	26.54	3.321	55.355	0.6239	High	26.32	26.71	3.498	58.305	0.7908	High	26.23	26.76	3.609	60.151	0.8557	High	26.24	26.77	3.57	59.498	0.7967	High	26.44	26.78	3.823	63.714	0.6369	High	26.38
ULK1c	445	459	VMIDFKPAFSKDDIL	28.18	2	12	27.96	28.14	5.494	45.781	0.7875	High	28	28.24	5.355	44.625	0.7268	High	28.06	28.23	5.38	44.833	0.7706	High	28.02	28.16	6.071	50.59	0.7939	High	27.92	28.05	6.114	50.951	0.7766	High	27.88	27.99	6.109	50.912	0.7478	High	27.95	28.05	6.673	55.607	0.7802	High	27.8
ULK1c	447	453	IDFKPAF	24.31	2	4	23.81	24.31	2.15	53.754	0.8449	High	23.94	24.07	2.104	52.602	0.8155	High	23.82	24.15	2.139	53.477	0.8965	High	23.88	23.93	2.519	62.985	0.7919	High	23.69	24.03	2.462	61.538	0.7695	High	23.78	23.93	2.454	61.348	0.8187	High	23.69	24.08	2.493	62.314	0.8147	High	23.82
ULK1c	447	459	IDFKPAFSKDDIL	26.54	2	10	26.25	26.33	4.43	44.297	0.3713	High	26.25	26.48	4.353	43.529	0.512	High	26.29	26.6	4.41	44.101	0.4293	High	26.1	26.57	5.36	53.598	0.7099	High	26.04	26.41	5.324	53.244	0.4807	High	26.11	26.41	5.352	53.52	0.5979	High	26.12	26.4	5.606	56.065	0.4115	High	25.97
ULK1c	447	465	IDFKPAFSKDDILPMDLGT	28.26	2	15							28.33	28.45	6.336	42.241	0.7198	High	28.13	28.44	6.37	42.468	0.894	High	28.04	28.14	7.558	50.383	0.875	High	28.01	28.28	7.648	50.988	0.8736	High	28.05	28.21	7.578	50.517	0.8885	High							27.92
ULK1c	447	465	IDFKPAFSKDDILPMDLGT	28.26	3	15							28.25	28.45	6.176	41.171	0.8091	High	28.15	28.31	6.531	43.54	0.8185	High	28.26	28.36	7.348	48.986	0.7705	High	27.97	28.21	7.719	51.462	0.8285	High	28.09	28.24	7.702	51.348	0.7834	High							27.93
ULK1c	466	476	FYREFQNPPQL	23.39	2	7							23.21	23.34	3.745	53.496	0.9193	High	23.41	23.61	3.757	53.671	0.9191	High							23.12	23.5	4.185	59.782	0.9043	High	23.08	23.53	4.19	59.86	0.9475	High							22.99
ULK1c	467	476	YREFQNPPQL	21.58	2	6	21.55	21.74	3.594	59.895	0.8223	High	21.3	21.91	3.572	59.532	0.8057	High	21.33	21.84	3.548	59.137	0.8269	High	21.23	21.34	3.835	63.917	0.7756	High	21.33	21.59	3.839	63.985	0.8413	High	21.24	21.78	3.855	64.246	0.8426	High	21.41	21.79	3.857	64.291	0.841	High	21.09
ULK1c	480	488	SIDIGAQSM	19.82	2	7	19.43	19.61	3.314	47.35	0.8535	High	19.42	19.66	3.292	47.032	0.867	High	19.42	19.58	3.255	46.493	0.8423	High	19.16	19.49	3.333	47.608	0.863	High	19.4	19.57	3.378	48.252	0.8627	High	19.34	19.64	3.435	49.076	0.8611	High	19.47	19.7	3.35	47.857	0.8557	High	19.23
ULK1c	493	499	DSLPEKL	19.14	2	4	19.08	19.12	2.534	63.348	0.8719	High	18.99	19.13	2.469	61.719	0.8251	High	18.95	19.18	2.483	62.068	0.847	High	18.77	18.91	2.568	64.202	0.7257	High	18.82	19.03	2.58	64.488	0.824	High	19.01	19.06	2.631	65.768	0.849	High	19.03	19.18	2.617	65.427	0.7907	High	18.67
ULK1c	493	508	DSLPEKLAVHEKNVRE	20	3	13	19.86	20.03	8.815	67.806	0.8901	High	19.66	19.85	8.661	66.62	0.8809	High	19.63	19.87	8.72	67.081	0.8832	High	19.5	19.89	8.701	66.929	0.8813	High	19.46	19.79	8.86	68.15	0.9312	High	19.58	19.84	8.729	67.142	0.8956	High	19.68	19.84	8.828	67.907	0.8781	High	19.35
ULK1c	493	512	DSLPEKLAVHEKNVREFDAF	25.93	3	17	25.63	25.9	9.904	58.256	0.8529	High	25.8	25.89	9.905	58.262	0.8447	High	25.65	25.91	9.862	58.014	0.8927	High	25.56	25.88	10.078	59.281	0.8603	High	25.4	25.77	10.263	60.369	0.816	High	25.45	25.81	10.345	60.852	0.8385	High	25.43	25.73	10.318	60.695	0.818	High	25.32
ULK1c+NDP52	6	16	NSQDRKDLDKF	18.64	2	9	18.49	18.8	2.641	29.349	0.8867	High	18.41	18.58	2.589	28.768	0.8784	High	18.3	18.51	2.498	27.756	0.8779	High	18.03	18.39	3.527	39.187	0.8558	High	18	18.38	3.492	38.796	0.8637	High	17.89	18.42	3.455	38.386	0.8583	High	18.45	18.7	4.525	50.273	0.8469	High	17.97
ULK1c+NDP52	6	16	NSQDRKDLDKF	18.64	3	9	18.57	18.67	2.702	30.018	0.8599	High	18.43	18.59	2.669	29.651	0.9015	High	18.3	18.58	2.487	27.636	0.892	High	18.22	18.47	3.49	38.776	0.8698	High	18.16	18.32	3.495	38.839	0.9092	High	18.02	18.32	3.591	39.905	0.9042	High	18.59	18.8	4.535	50.39	0.8635	High	18.01
ULK1c+NDP52	20	26	FALKTVQ	18.18	2	5	17.99	18.31	0.023	0.461	0.8927	High	18.02	18.18	0.044	0.881	0.9089	High	17.94	18.14	0.014	0.282	0.8748	High	17.82	18.14	0.011	0.225	0.8803	High	17.7	18.09	0.027	0.539	0.8985	High	17.78	18.02	0.027	0.549	0.8614	High	18	18.33	0.03	0.594	0.8884	High	17.74
ULK1c+NDP52	31	39	ARLGEKICT	17.19	2	7	16.91	17.24	1.929	27.561	0.8904	High	16.85	17.1	1.862	26.595	0.8719	High	16.81	17.03	1.834	26.194	0.8864	High	16.67	16.84	2.704	38.633	0.8952	High	16.68	16.85	2.762	39.46	0.8731	High	16.75	16.85	2.725	38.926	0.8952	High	16.94	17.18	4.004	57.197	0.8256	High	16.59
ULK1c+NDP52	40	50	RSSSSPTGSDW	17.88	2	8	17.51	17.56	4.242	53.02	0.7983	High	17.48	17.76	4.174	52.171	0.8715	High	17.55	17.65	4.112	51.394	0.8502	High	17.64	17.82	4.223	52.79	0.8887	High	17.32	17.48	4.24	52.995	0.8944	High	17.35	17.65	4.217	52.714	0.8835	High	17.41	17.67	4.165	52.064	0.8541	High	17.42
ULK1c+NDP52	54	64	AIKDIPEVTHE	18.38	2	8	18.14	18.3	2.121	26.514	0.8195	High	18.24	18.38	2.001	25.018	0.8669	High	18.11	18.26	2.022	25.272	0.8157	High	17.84	18.21	3.142	39.269	0.8353	High	17.94	18.21	3.17	39.62	0.883	High	17.71	18.21	3.102	38.774	0.8917	High	18.22	18.34	4.285	53.567	0.6255	High	17.78
ULK1c+NDP52	54	73	AIKDIPEVTHEAKKALAGQL	24.94	3	17	24.53	24.81	3.844	22.612	0.8488	High	24.44	24.85	3.624	21.318	0.9344	High	24.56	24.72	3.587	21.099	0.9163	High	24.3	24.47	6.029	35.462	0.9006	High	24.33	24.51	5.831	34.3	0.851	High	24.3	24.47	5.82	34.235	0.8483	High	24.42	24.57	9.47	55.705	0.7879	High	24.3
ULK1c+NDP52	54	80	AIKDIPEVTHEAKKALAGQLPAVGRSM	25.26	3	23	25.21	25.39	5.252	22.833	0.8176	High	25.09	25.35	5.172	22.489	0.8563	High	25.08	25.35	5.212	22.66	0.8326	High	24.86	25.15	8.598	37.385	0.8762	High	24.88	25.12	8.444	36.712	0.8742	High	24.82	25.01	8.235	35.802	0.8541	High							24.9
ULK1c+NDP52	54	81	AIKDIPEVTHEAKKALAGQLPAVGRSMC	25.62	3	24	25.55	25.76	5.753	23.972	0.9056	High	25.53	25.7	5.664	23.601	0.9256	High	25.49	25.8	5.448	22.699	0.9378	High	25.22	25.61	8.702	36.257	0.932	High	25.28	25.45	8.808	36.702	0.9276	High	25.21	25.51	8.615	35.897	0.9192	High	25.4	25.76	12.445	51.854	0.9163	High	25.2
ULK1c+NDP52	54	81	AIKDIPEVTHEAKKALAGQLPAVGRSMC	25.62	4	24	25.51	25.78	5.84	24.332	0.8267	High	25.49	25.81	5.649	23.539	0.8491	High	25.47	25.8	5.48	22.832	0.8482	High	25.31	25.61	8.57	35.709	0.7642	High	25.24	25.56	8.736	36.4	0.8052	High	25.34	25.49	8.33	34.71	0.8765	High	25.43	25.62	12.526	52.192	0.841	High	25.25
ULK1c+NDP52	54	83	AIKDIPEVTHEAKKALAGQLPAVGRSMCVE	26.03	3	26	25.87	26.05	5.793	22.279	0.9238	High	25.87	26.17	5.578	21.453	0.9322	High	25.75	26.05	5.606	21.563	0.9225	High	25.57	25.81	8.737	33.605	0.9246	High	25.63	25.79	8.776	33.755	0.8919	High	25.61	25.77	8.675	33.365	0.9276	High	25.63	26.01	12.983	49.936	0.8679	High	25.47
ULK1c+NDP52	54	83	AIKDIPEVTHEAKKALAGQLPAVGRSMCVE	26.03	4	26	25.77	25.99	5.947	22.872	0.9165	High	25.77	26.14	5.699	21.919	0.9176	High	25.74	26.08	5.551	21.352	0.9085	High	25.49	25.93	8.951	34.426	0.8345	High	25.52	25.88	9.141	35.159	0.8143	High	25.5	25.88	8.442	32.468	0.8787	High	25.62	25.98	12.982	49.932	0.8068	High	25.49
ULK1c+NDP52	84	95	ISLKTSEGDSME	18.23	2	10	18.19	18.34	3.098	30.977	0.8767	High	17.88	18.28	3.016	30.16	0.9134	High	17.84	18.24	2.993	29.927	0.8899	High	17.76	18.18	3.836	38.361	0.8776	High	17.69	18.24	3.834	38.345	0.8603	High	17.71	18.09	3.718	37.18	0.8739	High	18.24	18.25	3.982	39.82	0.7173	High	17.97
ULK1c+NDP52	124	129	LLKSLL	23.46	2	4	23.07	23.15	0.033	0.832	0.8166	High	23.06	23.18	0.045	1.137	0.8394	High	23	23.29	0.031	0.778	0.8049	High	22.86	23.14	0.013	0.32	0.8045	High	22.78	23.1	0.036	0.909	0.8306	High	22.8	23.11	0.032	0.807	0.8194	High	23.15	23.2	0.027	0.684	0.7988	High	22.93
ULK1c+NDP52	130	147	AITRVTPAYRLSRKQGHE	18.47	2	15	18.07	18.46	2.451	16.341	0.8728	High	18.02	18.36	2.372	15.815	0.8162	High	17.92	18.36	2.285	15.23	0.8493	High	17.82	17.99	3.355	22.365	0.892	High	17.81	17.96	3.374	22.493	0.8689	High	17.82	17.98	3.129	20.859	0.8626	High	17.84	18.42	4.32	28.801	0.8376	High	17.63
ULK1c+NDP52	130	147	AITRVTPAYRLSRKQGHE	18.47	3	15	18	18.52	2.432	16.217	0.9101	High	18	18.4	2.292	15.281	0.8963	High	17.85	18.46	2.233	14.888	0.9136	High	17.75	18.2	3.362	22.411	0.8933	High	17.73	18.18	3.274	21.827	0.9109	High	17.7	18.13	3.287	21.915	0.9197	High	18.33	18.48	4.27	28.465	0.8751	High	17.68
ULK1c+NDP52	130	151	AITRVTPAYRLSRKQGHEYVIL	24.28	3	19	24.14	24.25	2.598	13.671	0.7739	High	24.15	24.33	2.495	13.131	0.8166	High	24.1	24.22	2.511	13.217	0.8075	High	23.92	24.01	3.455	18.184	0.7182	High	23.88	23.94	3.376	17.767	0.7526	High	23.86	23.97	3.296	17.345	0.7902	High	23.84	24.05	4.156	21.875	0.6564	High	23.85
ULK1c+NDP52	131	147	ITRVTPAYRLSRKQGHE	17.93	3	14	17.65	17.89	2.439	17.42	0.9014	High	17.6	17.82	2.379	16.996	0.8915	High	17.51	17.9	2.289	16.348	0.8759	High	17.32	17.69	3.298	23.556	0.852	High	17.34	17.61	3.184	22.74	0.8746	High	17.27	17.59	3.339	23.851	0.8745	High	17.73	17.88	3.972	28.372	0.7942	High	17.26
ULK1c+NDP52	152	158	YRIYFGE	23.38	2	5	22.97	23.51	0.58	11.607	0.9052	High	22.98	23.36	0.577	11.53	0.9138	High	22.87	23.38	0.521	10.427	0.9098	High	22.82	23.38	1.23	24.608	0.9012	High	22.73	23.38	1.232	24.649	0.8945	High	22.75	23.27	1.203	24.062	0.8971	High	23.36	23.49	2.028	40.563	0.8699	High	22.75
ULK1c+NDP52	152	161	YRIYFGEVQL	28.51	2	8	28.19	28.57	2.476	30.955	0.8857	High	28.14	28.63	2.431	30.384	0.8864	High	28.19	28.55	2.355	29.432	0.887	High	27.89	28.44	3.161	39.511	0.8899	High	28.02	28.39	3.147	39.342	0.8969	High	27.98	28.41	3.155	39.443	0.8724	High	28.25	28.43	4.114	51.429	0.8882	High	28.08
ULK1c+NDP52	159	182	VQLSGLGEGFQTVRVGTVGTPVGT	25.27	2	21	24.87	25.26	6.729	32.044	0.8384	High	24.9	25.31	6.84	32.574	0.744	High	24.99	25.27	6.881	32.767	0.7618	High	24.78	25.19	8.199	39.044	0.6587	High	24.74	25.16	7.937	37.795	0.7118	High	24.79	25.14	7.821	37.243	0.7996	High	24.71	25.26	8.991	42.814	0.4049	High	24.83
ULK1c+NDP52	162	182	SGLGEGFQTVRVGTVGTPVGT	23.22	2	18	23.09	23.12	5.108	28.377	0.6838	High	22.98	23.19	5.149	28.605	0.6885	High	22.91	23.15	4.996	27.753	0.6287	High	22.83	23.02	6.347	35.263	0.53	High	22.83	23	6.125	34.027	0.6759	High	22.79	22.97	6.185	34.36	0.5978	High							22.84
ULK1c+NDP52	162	185	SGLGEGFQTVRVGTVGTPVGTITL	29.02	2	21	28.89	28.96	4.254	20.258	0.8153	High	28.9	29.15	4.144	19.735	0.8323	High	28.87	29.14	3.997	19.034	0.8501	High	28.76	29.1	5.236	24.933	0.853	High	28.74	29.07	5.259	25.043	0.8514	High	28.79	29.03	5.414	25.783	0.7609	High	28.83	29.36	6.235	29.69	0.8737	High	28.79
ULK1c+NDP52	165	182	GEGFQTVRVGTVGTPVGT	21.2	2	15	21.31	21.45	2.84	18.931	0.8847	High	21.23	21.31	2.666	17.772	0.8423	High	21.27	21.38	2.876	19.17	0.8075	High	21.02	21.22	3.714	24.761	0.7798	High	21.04	21.19	3.545	23.631	0.8144	High	21.12	21.27	3.531	23.541	0.8595	High	21.39	21.45	4.662	31.083	0.8562	High	21.01
ULK1c+NDP52	165	185	GEGFQTVRVGTVGTPVGTITL	28.19	2	18	27.83	28.07	3.176	17.643	0.8317	High	27.86	28.13	3.025	16.806	0.8927	High	27.84	28.14	3.058	16.99	0.9043	High	27.68	27.96	4.379	24.329	0.8432	High	27.69	28	4.236	23.531	0.8329	High	27.64	28.01	4.275	23.752	0.8394	High	27.8	28.04	5.18	28.778	0.8301	High	27.71
ULK1c+NDP52	169	185	QTVRVGTVGTPVGTITL	26.4	2	14	26.13	26.33	1.654	11.817	0.8415	High	26.18	26.22	1.647	11.765	0.8695	High	26.11	26.2	1.646	11.754	0.8796	High	26.03	26.18	2.167	15.477	0.9062	High	26.04	26.23	2.321	16.579	0.7731	High	26	26.17	2.148	15.345	0.8545	High	26.13	26.34	3.03	21.64	0.8131	High	26.11
ULK1c+NDP52	171	185	VRVGTVGTPVGTITL	26.24	2	12	26.01	26.14	1.231	10.259	0.8639	High	25.96	26.09	1.074	8.951	0.7212	High	26	26.23	1.079	8.994	0.8257	High	25.86	26.05	1.709	14.24	0.7654	High	25.86	26.07	1.661	13.843	0.851	High	25.82	26.05	1.766	14.72	0.8426	High	25.96	26.04	2.476	20.633	0.5607	High	25.88
ULK1c+NDP52	188	195	AYRINLAF	26.59	2	6	26.44	26.55	3.096	51.603	0.6366	High	26.3	26.51	3.072	51.202	0.8384	High	26.29	26.47	3.003	50.052	0.8035	High	26.12	26.34	3.72	62.003	0.8133	High	26.05	26.35	3.718	61.973	0.8078	High	26.04	26.32	3.677	61.282	0.8684	High	26.25	26.5	4	66.669	0.8247	High	26.16
ULK1c+NDP52	189	195	YRINLAF	26.54	2	5	26.3	26.39	2.977	59.544	0.8784	High	26.23	26.46	2.993	59.866	0.8337	High	26.22	26.45	2.949	58.986	0.8303	High	26.26	26.45	3.66	73.2	0.8528	High	26.03	26.39	3.678	73.565	0.8143	High	26.05	26.34	3.695	73.91	0.8449	High	26.38	26.47	3.796	75.924	0.8344	High	26.22
ULK1c+NDP52	199	209	RQFERTPPIMG	19.72	2	7	18.8	18.95	4.42	63.145	0.85	High	18.69	18.99	4.368	62.407	0.8768	High	18.67	18.82	4.31	61.567	0.8697	High	18.55	18.79	5.747	82.099	0.867	High	18.5	18.75	5.685	81.209	0.8733	High	18.55	18.6	5.704	81.483	0.8788	High	18.77	18.89	6.075	86.792	0.6004	High	18.48
ULK1c+NDP52	201	208	FERTPPIM	20.01	2	4	19.72	19.89	2.669	66.725	0.8672	High	19.48	19.86	2.704	67.608	0.8211	High	19.41	19.82	2.666	66.643	0.8224	High	19.31	19.72	2.891	72.28	0.8393	High	19.46	19.47	2.906	72.649	0.7703	High	19.31	19.42	2.884	72.112	0.7997	High	19.44	19.63	2.897	72.436	0.8627	High	19.39
ULK1c+NDP52	201	209	FERTPPIMG	19.31	2	5	18.96	18.99	3.112	62.248	0.7503	High	19.13	19.23	3.146	62.924	0.8465	High	18.8	19.3	3.124	62.473	0.8555	High	18.72	19.01	3.335	66.702	0.8604	High	18.83	19.07	3.309	66.174	0.8601	High	18.83	18.87	3.273	65.462	0.833	High	19.1	19.31	3.331	66.611	0.8547	High	18.85
ULK1c+NDP52	209	215	GIIIDHF	24.11	2	5	23.79	23.88	2.663	53.262	0.8254	High	23.83	24.1	2.661	53.213	0.8813	High	23.78	23.92	2.714	54.277	0.8488	High	23.85	23.96	2.731	54.62	0.8084	High	23.64	23.81	2.738	54.751	0.8324	High	23.58	23.73	2.78	55.601	0.8696	High	24.04	24.23	2.762	55.231	0.7964	High	23.74
ULK1c+NDP52	209	230	GIIIDHFVDRPYPSSSPMHPCN	24.88	2	16							24.59	24.85	8.615	53.844	0.8494	High	24.55	24.87	8.451	52.819	0.897	High	24.37	24.78	8.835	55.22	0.7607	High	24.23	24.78	9.189	57.433	0.8062	High	24.26	24.79	8.743	54.647	0.7491	High							24.34
ULK1c+NDP52	209	230	GIIIDHFVDRPYPSSSPMHPCN	24.88	3	16							24.55	24.89	8.211	51.318	0.9095	High	24.55	24.89	8.274	51.713	0.8945	High	24.36	24.78	8.829	55.181	0.9116	High	24.28	24.63	8.729	54.555	0.9375	High	24.24	24.74	8.627	53.919	0.9141	High							24.31
ULK1c+NDP52	210	215	IIIDHF	22.8	2	4	22.83	22.99	1.828	45.712	0.8016	High	22.5	22.87	1.817	45.418	0.8841	High	22.42	22.85	1.81	45.261	0.8354	High	22.51	22.52	1.915	47.871	0.8429	High	22.25	22.67	1.869	46.72	0.8705	High	22.21	22.66	1.906	47.642	0.8513	High	22.67	22.68	1.919	47.97	0.7632	High	22.23
ULK1c+NDP52	210	230	IIIDHFVDRPYPSSSPMHPCN	23.77	2	15							23.42	23.71	7.43	49.531	0.8425	High	23.28	23.71	7.336	48.907	0.8506	High	23.14	23.57	7.807	52.05	0.8451	High	23.14	23.55	7.709	51.39	0.8232	High	23.06	23.58	7.561	50.404	0.8388	High							23.34
ULK1c+NDP52	210	230	IIIDHFVDRPYPSSSPMHPCN	23.77	3	15							23.47	23.72	7.309	48.727	0.9089	High	23.47	23.72	7.092	47.278	0.9201	High	23.3	23.46	7.747	51.644	0.9015	High	23.16	23.51	7.772	51.812	0.8559	High	23.13	23.55	7.517	50.11	0.8914	High							23.2
ULK1c+NDP52	216	230	VDRPYPSSSPMHPCN	17.32	2	9	17.3	17.38	5.42	60.218	0.9016	High	16.98	17.11	5.223	58.037	0.787	High	16.94	17.09	5.48	60.887	0.8002	High	16.93	17.09	5.33	59.22	0.8909	High	16.89	17.03	5.456	60.628	0.8633	High	16.85	16.99	5.482	60.911	0.862	High	17.19	17.49	5.415	60.168	0.9221	High
ULK1c+NDP52	216	230	VDRPYPSSSPMHPCN	17.32	3	9	17.11	17.3	5.495	61.06	0.8774	High	17.18	17.27	5.56	61.773	0.8694	High	17.13	17.23	5.25	58.331	0.8618	High	17.18	17.3	5.657	62.858	0.83	High	16.78	17.2	5.54	61.552	0.8392	High	16.93	17.05	5.598	62.203	0.8954	High	16.91	17.21	5.616	62.397	0.7783	High	16.8
ULK1c+NDP52	231	246	YRTAGEDTGVIYPSVE	20.99	2	13	20.39	20.42	7.486	57.581	0.8926	High	20.06	20.41	7.433	57.174	0.9092	High	20.04	20.32	7.456	57.353	0.9143	High	20.25	20.33	7.89	60.691	0.9202	High	20.03	20.2	7.829	60.226	0.9192	High	19.96	20.21	7.689	59.148	0.9238	High							20
ULK1c+NDP52	231	250	YRTAGEDTGVIYPSVEDSQE	20.4	2	17	20.14	20.2	9.588	56.399	0.7012	High	20.1	20.29	9.446	55.564	0.8349	High	20.09	20.1	9.377	55.159	0.7224	High	19.87	20.24	9.785	57.557	0.8242	High	19.86	20.27	9.797	57.631	0.822	High	19.78	20.12	9.574	56.317	0.8308	High	20.23	20.42	9.669	56.876	0.8007	High	19.77
ULK1c+NDP52	257	264	STSPPSQL	14.54	2	4	13.95	14.46	1.289	32.229	0.7887	High	14.05	14.18	1.284	32.112	0.8192	High	13.95	14.3	1.282	32.04	0.8686	High	13.82	14.31	1.292	32.312	0.7956	High	13.87	14.12	1.25	31.245	0.8415	High	13.79	14.05	1.282	32.062	0.823	High	14.04	14.28	1.451	36.287	0.8438	High	13.89
ULK1c+NDP52	270	282	SYQPAALGVGSAD	18.16	2	10	17.84	18.18	3.632	36.317	0.8988	High	17.54	18.21	3.651	36.514	0.8369	High	17.5	18.13	3.604	36.035	0.8274	High	17.61	18.06	3.888	38.882	0.9028	High	17.37	18	3.829	38.295	0.8089	High	17.35	17.97	3.81	38.105	0.7982	High	17.81	18.29	3.837	38.372	0.8591	High	17.31
ULK1c+NDP52	290	328	AAGLNATHPHQLMVPGKEGGVPLAPNQPVHGTQADQERL	22.49	3	32							22.02	22.45	17.109	53.466	0.8897	High	22.01	22.29	17.027	53.208	0.9161	High							21.88	22.18	17.992	56.225	0.9199	High	21.76	22.26	17.47	54.594	0.8932	High							21.76
ULK1c+NDP52	290	328	AAGLNATHPHQLMVPGKEGGVPLAPNQPVHGTQADQERL	22.49	4	32							22.07	22.54	16.988	53.087	0.928	High	22.04	22.55	16.88	52.749	0.9233	High							21.78	22.34	17.768	55.526	0.9228	High	21.82	22.35	17.498	54.681	0.9379	High							21.99
ULK1c+NDP52	290	328	AAGLNATHPHQLMVPGKEGGVPLAPNQPVHGTQADQERL	22.49	5	32							22.14	22.46	17.08	53.374	0.9165	High	22.09	22.43	16.864	52.701	0.9209	High	21.88	22.32	18.526	57.894	0.6562	High	21.84	22.23	17.898	55.932	0.7449	High	21.82	22.29	17.449	54.528	0.8506	High
ULK1c+NDP52	329	347	ATCTPSDRTHCAATPSSSE	13.23	2	15							12.91	13.22	8.28	55.202	0.8969	High	12.86	13.26	7.952	53.014	0.9145	High	12.68	13.04	8.509	56.725	0.9137	High	12.53	12.92	8.5	56.668	0.9248	High	12.6	13.07	8.375	55.831	0.8955	High							12.61
ULK1c+NDP52	329	347	ATCTPSDRTHCAATPSSSE	13.23	3	15							12.88	13.34	8.043	53.62	0.8742	High	12.83	13.23	8.062	53.746	0.8938	High	12.68	13.11	8.463	56.417	0.8988	High	12.6	13.07	8.363	55.756	0.8806	High	12.59	13.05	8.231	54.871	0.904	High							12.62
ULK1c+NDP52	329	351	ATCTPSDRTHCAATPSSSEDTET	14.35	2	19							14.06	14.23	10.258	53.989	0.8765	High	13.99	14.27	9.942	52.327	0.8779	High	13.92	14.16	10.46	55.051	0.8762	High	13.86	14.04	10.584	55.705	0.8657	High	13.8	14.12	10.152	53.43	0.8649	High							13.86
ULK1c+NDP52	329	351	ATCTPSDRTHCAATPSSSEDTET	14.35	3	19							14.06	14.25	10.064	52.968	0.8718	High	13.92	14.24	10.103	53.174	0.858	High	13.85	14.19	10.623	55.912	0.9008	High	13.85	14.09	10.333	54.386	0.8627	High	13.82	14	10.35	54.476	0.8563	High							13.8
ULK1c+NDP52	329	366	ATCTPSDRTHCAATPSSSEDTETVSNSSEGRASPHDVL	19.81	3	33							19.4	19.63	15.929	48.271	0.8262	High	19.29	19.58	15.489	46.937	0.8152	High	19.18	19.44	16.889	51.179	0.816	High	19.21	19.31	17.133	51.917	0.8253	High	19.14	19.37	16.158	48.965	0.7226	High							19.07
ULK1c+NDP52	329	366	ATCTPSDRTHCAATPSSSEDTETVSNSSEGRASPHDVL	19.81	4	33							19.35	19.51	16.253	49.25	0.8686	High	19.26	19.58	15.577	47.204	0.798	High	19.24	19.4	17.089	51.786	0.8383	High	19.11	19.51	16.398	49.691	0.8483	High	19.11	19.4	16.306	49.413	0.8657	High							19.26
ULK1c+NDP52	348	366	DTETVSNSSEGRASPHDVL	18.82	2	16	18.27	18.38	9.399	58.744	0.7478	High	18.07	18.49	9.422	58.887	0.8248	High	18.15	18.18	9.436	58.974	0.6823	High	18	18.4	9.535	59.595	0.846	High	18.14	18.45	9.349	58.433	0.8206	High	18.15	18.18	9.546	59.665	0.584	High	18.29	18.38	9.489	59.308	0.6972	High	18.17
ULK1c+NDP52	352	366	VSNSSEGRASPHDVL	17.6	2	12							17.35	17.5	5.633	46.945	0.8259	High	17.21	17.37	5.667	47.224	0.8007	High	17.13	17.21	5.94	49.498	0.7868	High	17.03	17.3	5.839	48.657	0.7743	High	17.03	17.29	5.732	47.768	0.8354	High	17.41	17.59	6.107	50.893	0.7293	High	17
ULK1c+NDP52	369	377	IFVRKVGAF	22.08	2	7	21.85	21.99	4.291	61.294	0.7755	High	21.93	21.98	4.227	60.388	0.6556	High	21.81	21.87	4.311	61.586	0.6456	High	21.69	21.73	4.924	70.341	0.4888	High	21.56	21.61	4.9	70.003	0.4536	High	21.56	21.77	4.816	68.796	0.6622	High	21.81	21.95	5.178	73.97	0.31	High	21.7
ULK1c+NDP52	371	377	VRKVGAF	17.59	2	5	17.49	17.64	2.774	55.481	0.8488	High	17.24	17.66	2.833	56.656	0.8929	High	17.12	17.67	2.777	55.543	0.8517	High	16.97	17.51	3.3	66.002	0.9039	High	17.03	17.26	3.324	66.486	0.868	High	16.96	17.35	3.286	65.711	0.8993	High	17.39	17.58	3.366	67.322	0.8289	High	16.93
ULK1c+NDP52	371	384	VRKVGAFVNKPINQ	18.26	2	11	17.7	17.88	6.39	58.094	0.9188	High	17.62	17.87	6.488	58.985	0.875	High	17.44	17.94	6.354	57.76	0.9007	High	17.37	17.73	7.356	66.869	0.8888	High	17.46	17.65	7.283	66.207	0.8322	High	17.37	17.55	7.172	65.203	0.9024	High	17.58	17.74	7.458	67.801	0.8608	High	17.37
ULK1c+NDP52	377	384	FVNKPINQ	13.01	2	5	12.91	13.19	3.366	67.318	0.8552	High	12.69	13	3.34	66.803	0.8976	High	12.65	13.15	3.291	65.822	0.8884	High	12.42	12.98	3.411	68.226	0.8654	High	12.32	13	3.457	69.148	0.8269	High	12.31	13.05	3.39	67.793	0.8406	High	12.74	13	3.418	68.361	0.8805	High	12.37
ULK1c+NDP52	377	387	FVNKPINQVTL	21.59	2	8	21.16	21.32	5.63	70.374	0.7494	High	21.08	21.25	5.552	69.406	0.3829	High	21.14	21.25	5.489	68.614	0.6982	High	20.94	21.13	5.732	71.653	0.6969	High	21.03	21.15	5.776	72.195	0.5385	High	20.97	21.08	5.752	71.899	0.6143	High	21.2	21.29	5.675	70.934	0.6858	High
ULK1c+NDP52	378	384	VNKPINQ	10.26	2	4	10.24	10.39	2.983	74.563	0.726	High	10.17	10.57	2.961	74.023	0.3818	High	10.49	10.6	2.96	74.002	0.5895	High	10.12	10.39	2.965	74.135	0.8261	High	10.08	10.4	2.982	74.54	0.5252	High	10.1	10.39	2.991	74.774	0.4741	High	10.37	10.54	2.973	74.317	0.3111	High	10.17
ULK1c+NDP52	388	397	TSLDIPFAMF	31.57	2	7	31.57	31.81	2.512	35.891	0.9108	High	31.42	31.72	2.494	35.627	0.9076	High	31.36	31.44	2.491	35.588	0.7343	High	31.48	31.76	2.87	40.993	0.9081	High	31.24	31.73	2.912	41.594	0.8487	High	31.22	31.3	2.854	40.774	0.8382	High	31.52	31.55	3.163	45.188	0.8688	High	31.31
ULK1c+NDP52	397	404	FAPKNLEL	22.6	2	5	22.35	22.5	3.735	74.702	0.8457	High	22.15	22.57	3.677	73.536	0.8129	High	22.16	22.58	3.713	74.261	0.8153	High	22.1	22.53	3.751	75.011	0.8374	High	22.02	22.5	3.717	74.339	0.8874	High	22.28	22.36	3.782	75.641	0.7411	High	22.25	22.39	3.903	78.064	0.7604	High	22.16
ULK1c+NDP52	398	404	APKNLEL	19.12	2	5	18.83	19.27	3.434	68.681	0.8753	High	18.74	19.27	3.381	67.612	0.8533	High	18.7	19.2	3.358	67.163	0.8663	High	18.61	19.11	3.512	70.241	0.8761	High	18.53	19.02	3.486	69.724	0.8198	High	18.54	18.96	3.469	69.38	0.8663	High	18.74	19.26	3.481	69.611	0.8523	High	18.53
ULK1c+NDP52	405	427	EDTDPMVNPPDSPETESPLQGSL	23.7	2	16							23.31	23.77	6.969	43.554	0.86	High	23.24	23.43	6.942	43.389	0.8903	High	23.19	23.74	7.516	46.975	0.8931	High	23.22	23.6	7.502	46.888	0.8994	High	23.1	23.23	7.579	47.369	0.7368	High							23.19
ULK1c+NDP52	428	444	HSDGSSGGSSGNTHDDF	15.17	2	15	15.11	15.21	5.045	33.637	0.7807	High	14.89	15.02	5.012	33.412	0.8565	High	14.74	15.08	4.838	32.256	0.8709	High	14.65	14.8	5.379	35.859	0.8827	High	14.54	14.79	5.224	34.828	0.8986	High	14.51	14.68	4.984	33.228	0.7884	High							14.57
ULK1c+NDP52	428	444	HSDGSSGGSSGNTHDDF	15.17	3	15	14.97	15.12	5.126	34.175	0.6368	High	14.76	15.11	4.814	32.096	0.6743	High	14.76	15.07	4.981	33.205	0.7899	High	14.62	15.01	5.307	35.382	0.7467	High	14.61	14.9	5.437	36.247	0.7219	High	14.48	14.96	5.028	33.522	0.7464	High							14.45
ULK1c+NDP52	445	453	VMIDFKPAF	26.7	2	6	26.43	26.64	3.376	56.27	0.8463	High	26.31	26.59	3.389	56.487	0.8458	High	26.26	26.69	3.386	56.434	0.8209	High	26.41	26.61	3.561	59.343	0.6398	High	26.17	26.7	3.511	58.517	0.804	High	26.18	26.49	3.606	60.093	0.8525	High	26.52	26.72	3.74	62.33	0.7476	High	26.25
ULK1c+NDP52	445	459	VMIDFKPAFSKDDIL	28.18	2	12	27.93	28.08	5.466	45.553	0.7937	High	28.01	28.08	5.431	45.259	0.7412	High	27.95	28.1	5.563	46.357	0.8311	High	27.81	27.94	6.109	50.904	0.6925	High	27.81	27.87	6.347	52.889	0.7645	High	27.75	27.98	6.227	51.894	0.8116	High	27.93	28.12	6.598	54.983	0.8324	High	27.79
ULK1c+NDP52	447	453	IDFKPAF	24.31	2	4	23.79	24.28	2.178	54.46	0.8449	High	24.03	24.09	2.13	53.238	0.8432	High	23.78	24.13	2.153	53.829	0.7868	High	23.67	24.12	2.544	63.588	0.8136	High	23.71	23.9	2.525	63.133	0.8401	High	23.77	24	2.486	62.151	0.789	High	24.01	24.05	2.55	63.748	0.6014	High	23.71
ULK1c+NDP52	447	459	IDFKPAFSKDDIL	26.54	2	10	26.4	26.48	4.447	44.468	0.3955	High	26.21	26.43	4.44	44.402	0.4838	High	26.21	26.46	4.409	44.089	0.3917	High	26.03	26.33	5.404	54.038	0.5975	High	25.99	26.27	5.272	52.723	0.4933	High	26.02	26.23	5.337	53.368	0.6276	High	26.27	26.28	5.529	55.289	0.6418	High	26.07
ULK1c+NDP52	447	465	IDFKPAFSKDDILPMDLGT	28.26	2	15							28.1	28.46	6.357	42.383	0.8822	High	28.09	28.36	6.389	42.596	0.8752	High	27.9	28.27	7.393	49.288	0.8376	High	27.83	28.26	7.593	50.618	0.9054	High	27.83	28.26	7.278	48.522	0.8902	High							27.88
ULK1c+NDP52	447	465	IDFKPAFSKDDILPMDLGT	28.26	3	15							28.1	28.36	6.67	44.465	0.8622	High	28.09	28.3	6.484	43.227	0.8798	High	27.91	28.19	7.76	51.731	0.8219	High	27.92	28.23	7.395	49.298	0.8499	High	27.87	28.26	7.575	50.497	0.9032	High							27.88
ULK1c+NDP52	466	476	FYREFQNPPQL	23.39	2	7							23.19	23.43	3.776	53.949	0.9277	High	23.16	23.42	3.77	53.851	0.9177	High	23.24	23.4	4.174	59.632	0.9048	High	23	23.34	4.153	59.33	0.9006	High	22.92	23.12	4.137	59.097	0.9437	High							22.93
ULK1c+NDP52	467	476	YREFQNPPQL	21.58	2	6	21.43	21.6	3.585	59.743	0.855	High	21.22	21.74	3.557	59.278	0.8429	High	21.18	21.63	3.581	59.689	0.8154	High	21.12	21.61	3.833	63.882	0.8205	High	21.13	21.57	3.807	63.443	0.8567	High	20.98	21.63	3.81	63.508	0.8208	High	21.3	21.78	3.866	64.438	0.8494	High	20.98
ULK1c+NDP52	480	488	SIDIGAQSM	19.82	2	7	19.44	19.6	3.215	45.934	0.8202	High	19.34	19.53	3.267	46.673	0.7844	High	19.3	19.52	3.33	47.568	0.8378	High	19.31	19.46	3.342	47.737	0.8659	High	19.27	19.41	3.312	47.315	0.8256	High	19.31	19.37	3.267	46.665	0.8204	High	19.43	19.5	3.416	48.805	0.7453	High	19.34
ULK1c+NDP52	493	499	DSLPEKL	19.14	2	4	19.04	19.19	2.408	60.194	0.7914	High	18.85	19.11	2.407	60.173	0.8196	High	18.81	19.09	2.368	59.195	0.8313	High	18.69	19.01	2.578	64.458	0.8094	High	18.62	18.98	2.548	63.709	0.8045	High	18.65	18.93	2.577	64.418	0.8469	High	18.98	19.16	2.551	63.768	0.8245	High	18.62
ULK1c+NDP52	493	508	DSLPEKLAVHEKNVRE	20	3	13	19.73	19.89	8.837	67.979	0.8722	High	19.66	19.94	8.589	66.066	0.8971	High	19.54	19.91	8.689	66.841	0.8993	High	19.42	19.75	8.795	67.657	0.8857	High	19.39	19.67	8.752	67.325	0.9043	High	19.39	19.7	8.669	66.682	0.8898	High	19.59	19.91	8.831	67.93	0.8953	High	19.34
ULK1c+NDP52	493	512	DSLPEKLAVHEKNVREFDAF	25.93	3	17	25.73	25.8	10.124	59.556	0.8362	High	25.65	25.83	10.029	58.996	0.8722	High	25.59	25.81	9.944	58.496	0.8592	High	25.47	25.69	10.413	61.253	0.8539	High	25.36	25.65	10.347	60.865	0.901	High	25.4	25.5	10.308	60.636	0.8283	High	25.73	25.91	10.394	61.141	0.7466	High	25.34
ATG101							6s						6s						6s						60s						60s						60s						600s						600s
State	Start	End	Sequence	Search RT	Charge	Max D	Start RT	End RT	#D	%D	Score	Conf	Start RT	End RT	#D	%D	Score	Conf	Start RT	End RT	#D	%D	Score	Conf	Start RT	End RT	#D	%D	Score	Conf	Start RT	End RT	#D	%D	Score	Conf	Start RT	End RT	#D	%D	Score	Conf	Start RT	End RT	#D	%D	Score	Conf	Start RT
ULK1c	9	19	EVSVEGRQVEE	16.77	2	9	16.42	16.55	3.077	34.191	0.802	High	16.54	16.74	2.995	33.277	0.8664	High	16.38	16.49	2.929	32.55	0.7252	High	16.29	16.44	3.083	34.252	0.6615	High	16.36	16.54	3.138	34.866	0.7596	High	16.47	16.56	3.215	35.727	0.7692	High	16.29	16.46	4.147	46.075	0.7541	High	16.16
ULK1c	22	29	LAVLHTVL	23.84	2	6	23.68	23.81	0.039	0.643	0.8613	High	23.67	23.81	0.062	1.033	0.8586	High	23.64	23.94	0.04	0.675	0.8577	High	23.63	23.77	0.087	1.45	0.8675	High	23.52	23.58	0.051	0.853	0.8756	High	23.56	23.64	0.068	1.136	0.854	High	23.58	23.61	0.058	0.972	0.8307	High	23.45
ULK1c	30	56	LHRSTGKFHYKKEGTYSIGTVGTQDVD	20.98	3	25	20.95	21	5.295	21.18	0.7591	High	20.82	20.96	4.882	19.528	0.8569	High	20.85	20.93	5.017	20.07	0.8484	High	20.76	20.89	6.357	25.428	0.8594	High	20.73	20.86	6.592	26.367	0.8652	High	20.76	20.83	6.673	26.69	0.7945	High	20.72	20.83	8.223	32.89	0.6624	High	20.55
ULK1c	30	59	LHRSTGKFHYKKEGTYSIGTVGTQDVDCDF	24.61	3	28	24.69	24.72	5.33	19.035	0.8583	High	24.65	24.67	4.579	16.353	0.8133	High	24.59	24.77	4.688	16.743	0.8925	High	24.3	24.73	6.342	22.652	0.8638	High	24.3	24.72	6.597	23.561	0.9182	High	24.3	24.72	6.696	23.915	0.9041	High	24.59	24.67	8.672	30.97	0.8216	High	24.38
ULK1c	30	59	LHRSTGKFHYKKEGTYSIGTVGTQDVDCDF	24.61	4	28	24.59	24.73	5.303	18.941	0.8172	High	24.58	24.67	4.984	17.801	0.7497	High	24.65	24.75	5.094	18.194	0.8362	High	24.49	24.68	6.366	22.737	0.7885	High	24.43	24.59	6.647	23.739	0.7843	High	24.48	24.57	6.625	23.66	0.7981	High							24.35
ULK1c	63	72	TYVRVSSEEL	20.2	2	8	20.1	20.18	2.047	25.59	0.887	High	20.07	20.15	1.944	24.301	0.8809	High	20.07	20.1	1.989	24.859	0.8769	High	19.93	20.05	1.923	24.04	0.9007	High	19.87	20.1	1.95	24.377	0.8889	High	19.94	20.1	1.973	24.667	0.8906	High	19.86	20.06	2.33	29.122	0.8976	High	19.88
ULK1c	64	72	YVRVSSEEL	19.49	2	7	19.33	19.57	1.892	27.031	0.8349	High	19.39	19.53	1.827	26.095	0.8242	High	19.26	19.38	1.798	25.691	0.8036	High	19.14	19.27	1.822	26.026	0.8165	High	19.19	19.36	1.925	27.506	0.8425	High	19.26	19.42	1.896	27.082	0.8227	High	19.33	19.47	2.164	30.919	0.8375	High	19.19
ULK1c	72	83	LDRALRKVVGEF	25.01	2	10	24.83	24.97	0.14	1.403	0.8965	High	24.88	25.11	0.168	1.68	0.8996	High	24.9	25.06	0.131	1.307	0.8929	High	24.78	24.91	0.523	5.226	0.8869	High	24.68	24.85	0.491	4.912	0.9261	High	24.6	24.76	0.621	6.207	0.9086	High	24.68	24.8	1.59	15.897	0.7006	High	24.51
ULK1c	73	83	DRALRKVVGEF	22.67	2	9	22.57	22.82	0.157	1.739	0.9346	High	22.55	22.88	0.137	1.52	0.9353	High	22.58	22.86	0.132	1.469	0.9346	High	22.41	22.7	0.462	5.13	0.9333	High	22.3	22.64	0.486	5.395	0.933	High	22.42	22.58	0.465	5.166	0.9292	High	22.35	22.57	1.7	18.885	0.9033	High	22.22
ULK1c	73	98	DRALRKVVGEFKDALRNSGGDGLGQM	28.49	3	24	28.49	28.65	3.776	15.731	0.914	High	28.43	28.6	3.64	15.167	0.8348	High	28.51	28.64	3.881	16.173	0.856	High	28.48	28.59	5.124	21.35	0.8723	High	28.27	28.39	5.494	22.893	0.8571	High	28.23	28.52	5.302	22.094	0.8322	High	28.22	28.64	7.183	29.929	0.9262	High	28.13
ULK1c	73	100	DRALRKVVGEFKDALRNSGGDGLGQMSL	29.47	3	26	29.32	29.61	3.963	15.241	0.9198	High	29.28	29.4	3.67	14.116	0.8785	High	29.34	29.55	3.598	13.839	0.9247	High	29.22	29.52	5.221	20.081	0.9218	High	29.25	29.41	5.342	20.547	0.9011	High	29.18	29.42	5.455	20.98	0.9142	High	29.18	29.48	7.345	28.249	0.8954	High	29.04
ULK1c	73	101	DRALRKVVGEFKDALRNSGGDGLGQMSLE	28.96	3	27	28.83	28.97	3.609	13.365	0.8612	High	28.8	29.02	3.274	12.125	0.8449	High	28.86	29.01	3.541	13.116	0.8666	High	28.84	28.96	5.056	18.726	0.8321	High	28.66	28.8	5.196	19.245	0.77	High	28.64	28.9	5.284	19.57	0.8073	High	28.64	28.87	7.345	27.205	0.8249	High	28.51
ULK1c	83	100	FKDALRNSGGDGLGQMSL	24.52	2	16							24.33	24.38	2.73	17.063	0.7657	High	24.29	24.37	2.513	15.704	0.6349	High	24.25	24.34	3.71	23.187	0.7538	High	24.23	24.35	4.019	25.121	0.7469	High	24.26	24.36	4.129	25.809	0.6659	High							24.06
ULK1c	83	100	FKDALRNSGGDGLGQMSL	24.52	3	16	24.35	24.44	3.12	19.499	0.7848	High	24.4	24.47	2.9	18.123	0.7771	High	24.27	24.41	2.868	17.928	0.658	High	24.21	24.41	3.894	24.336	0.8099	High	24.11	24.19	4.155	25.968	0.7747	High	24.12	24.35	3.998	24.988	0.7832	High	24.15	24.28	4.52	28.253	0.6891	High	24.04
ULK1c	84	98	KDALRNSGGDGLGQM	19.29	2	13	19.06	19.28	4.282	32.941	0.9071	High	19.1	19.31	4.088	31.443	0.8917	High	19.1	19.3	4.193	32.256	0.875	High	18.9	19.17	5.216	40.12	0.8761	High	18.89	19.1	5.281	40.62	0.8799	High	18.93	19.13	5.288	40.674	0.855	High	18.94	19.04	5.541	42.624	0.8739	High	18.79
ULK1c	84	100	KDALRNSGGDGLGQMSL	22.82	2	15	22.68	22.77	2.996	19.972	0.7404	High	22.67	22.83	2.784	18.559	0.7933	High	22.62	22.75	2.879	19.194	0.7922	High	22.66	22.77	4.043	26.953	0.8071	High	22.58	22.66	3.915	26.099	0.728	High	22.52	22.59	3.997	26.643	0.7103	High	22.57	22.61	4.773	31.821	0.7854	High	22.55
ULK1c	101	115	EFYQKKKSRWPFSDE	24.1	3	12							23.89	24.04	3.685	30.711	0.9148	High	24.03	24.09	3.726	31.05	0.9045	High	23.69	23.75	4.325	36.042	0.8513	High	23.84	23.88	4.507	37.555	0.8526	High	23.7	23.91	4.419	36.828	0.9244	High							23.74
ULK1c	102	115	FYQKKKSRWPFSDE	23.56	2	11							23.37	23.56	3.619	32.897	0.888	High	23.38	23.54	3.82	34.723	0.8986	High	23.4	23.64	4.21	38.272	0.829	High	23.3	23.54	4.509	40.994	0.8646	High	23.28	23.41	4.311	39.187	0.9008	High	23.42	23.49	4.722	42.926	0.8863	High
ULK1c	102	115	FYQKKKSRWPFSDE	23.56	3	11							23.4	23.69	3.708	33.706	0.9313	High	23.41	23.65	3.887	35.337	0.9104	High	23.3	23.55	4.273	38.843	0.9319	High	23.4	23.51	4.478	40.71	0.9005	High	23.24	23.48	4.483	40.759	0.9301	High	23.56	23.59	4.658	42.343	0.821	High	23.19
ULK1c	102	122	FYQKKKSRWPFSDECIPWEVW	33.13	3	17							32.99	33.03	4.015	23.616	0.8904	High	33.02	33.04	4.058	23.872	0.8709	High	32.82	33.04	5.245	30.851	0.9216	High	32.86	32.96	5.21	30.644	0.9244	High	32.71	32.88	5.208	30.633	0.9209	High							32.76
ULK1c	103	115	YQKKKSRWPFSDE	23.21	3	10							22.79	22.99	3.88	38.797	0.8805	High	22.74	22.83	3.881	38.811	0.8989	High	22.59	22.67	4.455	44.549	0.7802	High	22.5	22.92	4.536	45.359	0.9179	High	22.6	22.88	4.488	44.884	0.8967	High							22.39
ULK1c	103	122	YQKKKSRWPFSDECIPWEVW	32.94	3	16							32.69	32.84	4.12	25.748	0.8849	High	32.76	32.79	4.136	25.852	0.8347	High	32.83	32.89	4.905	30.657	0.8633	High	32.43	32.74	5.022	31.386	0.8983	High	32.57	32.71	5.021	31.384	0.9152	High							32.44
ULK1c	123	131	TVKVHVVAL	20.93	2	7	20.94	21.11	1.261	18.02	0.8929	High	20.7	20.97	1.191	17.008	0.9046	High	20.94	20.97	1.251	17.876	0.9289	High	21.03	21.12	1.508	21.549	0.8859	High	20.75	20.91	1.602	22.888	0.9081	High	20.84	20.92	1.581	22.59	0.9353	High	20.64	20.68	2.488	35.545	0.8928	High	20.54
ULK1c	132	142	ATEQERQICRE	15.02	2	9	15.06	15.23	6.078	67.537	0.9003	High	14.84	14.98	5.95	66.114	0.9007	High	14.72	15.04	6.008	66.759	0.9041	High	14.56	14.91	6.456	71.731	0.9062	High	14.7	14.95	6.606	73.403	0.8927	High	14.72	14.96	6.571	73.012	0.9001	High	14.93	15.14	6.606	73.396	0.8111	High	14.54
ULK1c	132	148	ATEQERQICREKVGEKL	19.73	3	15	19.46	19.62	7.177	47.849	0.8532	High	19.31	19.4	7.053	47.017	0.4837	High	19.37	19.52	7.295	48.636	0.7503	High	19.24	19.36	9.172	61.147	0.7569	High	19.22	19.3	9.383	62.551	0.7763	High	19.17	19.27	9.257	61.716	0.7811	High	19.23	19.3	10.598	70.655	0.7835	High	19.03
ULK1c	143	150	KVGEKLCE	14.95	2	6	14.77	14.9	0.437	7.283	0.8941	High	14.78	14.91	0.378	6.304	0.8747	High	14.73	14.77	0.418	6.973	0.9159	High	14.47	14.65	1.343	22.377	0.8803	High	14.52	14.69	1.302	21.7	0.8745	High	14.65	14.71	1.282	21.372	0.9037	High	14.65	14.8	2.822	47.036	0.8479	High	14.33
ULK1c	149	154	CEKIIN	13.52	2	4	13.36	13.56	0.02	0.496	0.7896	High	13.56	13.61	0.014	0.342	0.777	High	13.38	13.53	0.047	1.167	0.8113	High	13.17	13.46	0.018	0.45	0.789	High	13.23	13.25	0.038	0.941	0.8071	High	13.21	13.38	0.035	0.881	0.7953	High	13.25	13.44	0.076	1.888	0.8362	High	13.02
ULK1c	151	157	KIINIVE	20.37	2	5	20.15	20.27	0.068	1.368	0.7933	High	20.2	20.3	0.08	1.59	0.821	High	20.13	20.28	0.023	0.461	0.7039	High	20.09	20.19	0.033	0.668	0.7756	High	19.95	20.16	0.091	1.813	0.8157	High	19.96	20.2	0.044	0.888	0.7746	High	19.92	20.05	0.074	1.484	0.7628	High	19.88
ULK1c	158	173	VMNRHEYLPKMPTQSE	20.73	2	12							20.53	20.66	4.611	38.428	0.8751	High	20.52	20.63	4.565	38.046	0.8972	High	20.4	20.7	6.102	50.846	0.8953	High							20.42	20.58	6.241	52.011	0.8676	High							20.25
ULK1c	158	173	VMNRHEYLPKMPTQSE	20.73	3	12	20.41	20.53	4.83	40.247	0.7762	High	20.54	20.74	4.606	38.382	0.9023	High	20.58	20.63	4.66	38.831	0.8579	High	20.54	20.65	6.104	50.864	0.8664	High	20.35	20.61	6.356	52.97	0.8979	High	20.4	20.6	6.309	52.575	0.9083	High							20.33
ULK1c	158	175	VMNRHEYLPKMPTQSEVD	21.57	2	14							21.33	21.44	4.787	34.19	0.7109	High	21.33	21.45	4.823	34.451	0.7265	High	21.23	21.38	6.463	46.164	0.7493	High	21.2	21.38	6.533	46.666	0.7109	High	21.22	21.43	6.768	48.346	0.7319	High							21.1
ULK1c	158	175	VMNRHEYLPKMPTQSEVD	21.57	3	14	21.46	21.62	5.084	36.312	0.8692	High	21.33	21.51	4.894	34.956	0.8754	High	21.32	21.68	4.86	34.715	0.9168	High	21.23	21.46	6.626	47.328	0.9026	High	21.26	21.34	6.963	49.734	0.8313	High	21.19	21.37	6.952	49.66	0.9132	High							21.13
ULK1c	158	178	VMNRHEYLPKMPTQSEVDNVF	25.98	2	17							25.89	26.08	4.649	27.348	0.8723	High	25.84	26.09	4.812	28.303	0.8887	High	25.83	25.94	6.902	40.602	0.9192	High	25.77	25.87	7.196	42.332	0.9008	High	25.76	25.9	7.107	41.809	0.8633	High							25.6
ULK1c	158	178	VMNRHEYLPKMPTQSEVDNVF	25.98	3	17							25.84	26.05	4.842	28.484	0.919	High	25.83	26.09	4.886	28.744	0.8934	High	25.75	26.01	6.819	40.109	0.9144	High	25.7	25.96	7.293	42.9	0.9049	High	25.7	25.96	7.207	42.393	0.8958	High							25.66
ULK1c	158	182	VMNRHEYLPKMPTQSEVDNVFDTGL	28.32	3	21	28.29	28.35	5.237	24.94	0.8278	High	28.18	28.43	4.947	23.559	0.833	High	28.21	28.41	4.972	23.675	0.8914	High	28.23	28.37	7.437	35.413	0.8236	High	28.09	28.34	7.688	36.608	0.8029	High	28.05	28.29	7.676	36.552	0.7709	High	28.13	28.21	9.172	43.676	0.676	High	28.02
ULK1c	179	189	DTGLRDVQPYL	22.95	2	8	22.79	23	1.052	13.154	0.8595	High	22.81	22.92	0.991	12.386	0.8242	High	22.74	22.93	0.981	12.26	0.8117	High	22.69	22.84	1.235	15.436	0.789	High	22.66	22.87	1.265	15.818	0.7871	High	22.68	22.85	1.277	15.956	0.7707	High	22.7	22.83	1.661	20.764	0.8324	High	22.66
ULK1c	183	189	RDVQPYL	19.27	2	4	19.09	19.33	0.089	2.223	0.9361	High	19.09	19.47	0.057	1.433	0.9262	High	19.17	19.46	0.057	1.427	0.9287	High	18.94	19.22	0.044	1.112	0.918	High	18.92	19.2	0.075	1.878	0.9319	High	18.89	19.09	0.061	1.536	0.9286	High	18.92	19.12	0.115	2.877	0.9339	High	18.81
ULK1c	190	194	YKISF	22.98	2	3	22.79	23.03	1.63	54.333	0.843	High	22.71	22.81	1.63	54.319	0.8014	High	22.96	23.06	1.64	54.683	0.8793	High	22.75	22.82	1.733	57.776	0.8467	High	22.62	22.81	1.709	56.957	0.798	High	22.64	22.89	1.708	56.917	0.8276	High	22.73	22.77	1.707	56.903	0.8557	High	22.74
ULK1c	195	205	QITDALGTSVT	19.02	2	9	18.94	19.03	5.878	65.306	0.7312	High	18.93	19.08	5.749	63.876	0.8234	High	18.91	19.09	5.847	64.966	0.8438	High	18.82	18.95	5.81	64.554	0.7452	High	18.82	18.99	5.967	66.304	0.8071	High	18.83	18.92	5.883	65.372	0.8192	High	18.81	18.94	5.935	65.945	0.7813	High	18.73
ULK1c	195	207	QITDALGTSVTTT	19.17	2	11	19.06	19.15	6.296	57.239	0.7717	High	18.92	19.26	6.167	56.067	0.777	High	18.93	19.22	6.204	56.398	0.8048	High	18.82	19.1	6.52	59.27	0.8964	High	18.8	18.95	6.641	60.372	0.8785	High	18.88	18.95	6.609	60.078	0.8739	High	18.86	18.96	6.861	62.372	0.7969	High	18.7
ULK1c	195	218	QITDALGTSVTTTMRRLIKDTLAL	36.26	3	22	36.19	36.35	15.005	68.203	0.8579	High	36.02	36.26	14.788	67.219	0.9097	High	36	36.33	14.926	67.843	0.9026	High	36.05	36.29	15.623	71.014	0.9134	High	35.83	36.16	15.695	71.34	0.9043	High	35.83	36.24	15.684	71.291	0.9157	High	36.05	36.21	15.943	72.467	0.9121	High	35.86
ULK1c+NDP52	9	19	EVSVEGRQVEE	16.77	2	9	16.37	16.62	3.029	33.659	0.8218	High	16.33	16.65	2.93	32.553	0.8132	High	16.32	16.53	2.96	32.884	0.8178	High	16.33	16.5	3.205	35.612	0.7621	High	16.19	16.41	3.139	34.882	0.6471	High	16.16	16.44	3.129	34.764	0.7586	High	16.32	16.55	4.057	45.076	0.6945	High	16.22
ULK1c+NDP52	22	29	LAVLHTVL	23.84	2	6	23.56	23.77	0.033	0.55	0.8183	High	23.62	23.76	0.098	1.632	0.8963	High	23.51	23.71	0.072	1.203	0.8866	High	23.4	23.56	0.058	0.969	0.8629	High	23.38	23.55	0.073	1.218	0.889	High	23.39	23.47	0.018	0.305	0.8484	High	23.67	23.73	0.136	2.268	0.8985	High	23.45
ULK1c+NDP52	30	56	LHRSTGKFHYKKEGTYSIGTVGTQDVD	20.98	3	25	20.84	21.16	5.349	21.395	0.7255	High	20.79	21.01	5.236	20.944	0.7613	High	20.75	20.97	5.107	20.428	0.8743	High	20.66	20.86	7.084	28.336	0.7405	High	20.6	20.75	6.637	26.547	0.7568	High	20.6	20.73	6.66	26.638	0.7748	High	20.85	21.08	8.334	33.335	0.7885	High	20.47
ULK1c+NDP52	30	59	LHRSTGKFHYKKEGTYSIGTVGTQDVDCDF	24.61	3	28	24.5	24.76	4.828	17.243	0.9013	High	24.52	24.69	4.534	16.192	0.8701	High	24.45	24.7	4.461	15.931	0.8697	High	24.33	24.57	6.623	23.654	0.8464	High	24.29	24.46	6.422	22.935	0.8846	High	24.19	24.55	6.313	22.546	0.9014	High	24.57	24.64	8.483	30.297	0.8732	High	24.38
ULK1c+NDP52	30	59	LHRSTGKFHYKKEGTYSIGTVGTQDVDCDF	24.61	4	28	24.6	24.75	5.058	18.065	0.8236	High	24.55	24.65	4.883	17.44	0.8099	High	24.5	24.6	4.396	15.698	0.7623	High	24.29	24.59	6.714	23.979	0.7913	High	24.3	24.53	6.51	23.249	0.8209	High	24.32	24.45	6.363	22.725	0.7843	High							24.31
ULK1c+NDP52	63	72	TYVRVSSEEL	20.2	2	8	19.92	20.14	1.972	24.653	0.8938	High	19.83	20	1.92	24.004	0.8751	High	19.84	19.84	1.882	23.529	0.8791	High	19.83	19.97	2.061	25.761	0.8948	High	19.7	19.92	2.042	25.526	0.9031	High	19.78	19.81	1.988	24.854	0.9027	High	19.87	20.17	2.346	29.322	0.9324	High	19.76
ULK1c+NDP52	64	72	YVRVSSEEL	19.49	2	7	19.4	19.52	1.966	28.08	0.8427	High	19.15	19.37	1.861	26.591	0.834	High	19.12	19.25	1.909	27.274	0.7364	High	19.14	19.33	1.875	26.779	0.812	High	19.09	19.26	1.886	26.948	0.7981	High	19.05	19.21	1.944	27.771	0.8578	High	19.27	19.46	2.243	32.046	0.7624	High	19.07
ULK1c+NDP52	72	83	LDRALRKVVGEF	25.01	2	10	24.79	25.03	0.118	1.179	0.9074	High	24.93	24.99	0.146	1.456	0.8991	High	24.76	24.98	0.168	1.679	0.8983	High	24.59	24.75	0.433	4.334	0.7369	High	24.55	24.67	0.528	5.278	0.921	High	24.54	24.71	0.436	4.363	0.8142	High	24.64	24.91	1.831	18.309	0.9057	High	24.5
ULK1c+NDP52	73	83	DRALRKVVGEF	22.67	2	9	22.52	22.8	0.164	1.823	0.9262	High	22.56	22.72	0.167	1.852	0.9338	High	22.41	22.7	0.135	1.498	0.9205	High	22.25	22.55	0.485	5.385	0.9177	High	22.2	22.49	0.491	5.452	0.9307	High	22.21	22.47	0.489	5.436	0.9306	High	22.37	22.7	1.648	18.31	0.885	High	22.21
ULK1c+NDP52	73	98	DRALRKVVGEFKDALRNSGGDGLGQM	28.49	3	24	28.38	28.67	3.768	15.699	0.9161	High	28.41	28.68	3.674	15.306	0.8853	High	28.4	28.64	3.548	14.783	0.9049	High	28.16	28.37	5.524	23.015	0.8451	High	28.18	28.42	5.232	21.798	0.8715	High	28.2	28.36	5.28	21.999	0.8693	High	28.48	28.61	6.926	28.857	0.878	High	28.12
ULK1c+NDP52	73	100	DRALRKVVGEFKDALRNSGGDGLGQMSL	29.47	3	26	29.33	29.61	3.784	14.553	0.9256	High	29.33	29.49	3.646	14.022	0.9232	High	29.31	29.61	3.464	13.325	0.9216	High	29.08	29.37	5.399	20.766	0.9322	High	29.24	29.28	5.262	20.237	0.9103	High	29.05	29.43	5.284	20.324	0.9263	High	29.29	29.56	7.184	27.629	0.9346	High	29.05
ULK1c+NDP52	73	101	DRALRKVVGEFKDALRNSGGDGLGQMSLE	28.96	3	27	28.78	28.93	3.854	14.273	0.8585	High	28.83	28.99	3.615	13.388	0.8701	High	28.81	28.91	3.55	13.149	0.7958	High	28.51	28.72	5.593	20.716	0.8448	High	28.57	28.74	5.452	20.192	0.8502	High	28.56	28.71	5.607	20.767	0.8526	High	28.73	28.91	7.463	27.639	0.8368	High	28.56
ULK1c+NDP52	83	100	FKDALRNSGGDGLGQMSL	24.52	2	16							24.22	24.38	2.988	18.674	0.764	High	24.22	24.33	2.811	17.568	0.7694	High	24.1	24.2	4.276	26.723	0.8043	High	24.14	24.22	4.047	25.295	0.8075	High	24.09	24.25	4.047	25.292	0.8058	High							24.03
ULK1c+NDP52	83	100	FKDALRNSGGDGLGQMSL	24.52	3	16	24.2	24.55	2.893	18.082	0.807	High	24.22	24.39	2.699	16.87	0.7546	High	24.23	24.33	2.523	15.769	0.7322	High	24.19	24.25	4.275	26.721	0.692	High	24.07	24.1	4.13	25.813	0.8547	High	23.97	24.2	4.09	25.561	0.8529	High	24.21	24.53	4.764	29.775	0.7452	High	23.93
ULK1c+NDP52	84	98	KDALRNSGGDGLGQM	19.29	2	13	19.02	19.26	4.098	31.52	0.8589	High	19.02	19.2	4.022	30.942	0.8577	High	18.93	19.14	3.942	30.32	0.829	High	18.72	19	5.324	40.957	0.8378	High	18.66	18.91	5.23	40.228	0.7939	High	18.64	18.95	5.212	40.092	0.8718	High	18.95	19.14	5.666	43.583	0.8999	High	18.75
ULK1c+NDP52	84	100	KDALRNSGGDGLGQMSL	22.82	2	15	22.71	22.81	3.323	22.15	0.6998	High	22.6	22.7	3.221	21.473	0.7821	High	22.55	22.68	3.12	20.799	0.757	High	22.43	22.63	3.926	26.171	0.7741	High	22.43	22.54	4.133	27.552	0.7339	High	22.37	22.52	4.094	27.291	0.7794	High	22.64	22.75	4.624	30.828	0.7633	High	22.48
ULK1c+NDP52	101	115	EFYQKKKSRWPFSDE	24.1	3	12							23.77	23.95	3.852	32.103	0.8827	High	23.71	23.8	3.825	31.871	0.8904	High	23.52	23.68	4.436	36.965	0.9081	High	23.51	23.72	4.336	36.132	0.892	High	23.4	23.59	4.334	36.114	0.8814	High							23.52
ULK1c+NDP52	102	115	FYQKKKSRWPFSDE	23.56	2	11	23.5	23.62	3.976	36.143	0.8178	High	23.33	23.57	3.998	36.347	0.8835	High	23.27	23.57	3.959	35.992	0.8901	High	23.16	23.31	4.431	40.283	0.8682	High	23.1	23.26	4.354	39.578	0.8803	High	23.07	23.29	4.371	39.74	0.7848	High	23.48	23.53	4.575	41.592	0.8335	High	23.3
ULK1c+NDP52	102	115	FYQKKKSRWPFSDE	23.56	3	11	23.6	23.69	4.04	36.73	0.8833	High	23.19	23.48	3.987	36.245	0.9169	High	23.19	23.38	3.912	35.564	0.9158	High	23.24	23.28	4.436	40.331	0.9082	High	23.09	23.28	4.42	40.181	0.906	High	23.2	23.27	4.38	39.815	0.9072	High							23.09
ULK1c+NDP52	102	122	FYQKKKSRWPFSDECIPWEVW	33.13	3	17	32.92	33.1	4.581	26.947	0.8928	High	32.77	33.28	4.292	25.248	0.9033	High	32.98	33.1	4.43	26.057	0.8264	High	32.68	32.98	5.179	30.467	0.8765	High	32.64	32.87	5.121	30.125	0.8763	High	32.62	32.92	5.13	30.175	0.8845	High							32.72
ULK1c+NDP52	103	115	YQKKKSRWPFSDE	23.21	3	10	22.76	22.89	4.093	40.935	0.8388	High	22.74	22.82	4.034	40.34	0.9039	High	22.69	22.85	3.984	39.837	0.9018	High	22.55	22.64	4.706	47.062	0.8082	High	22.34	22.63	4.675	46.747	0.917	High	22.33	22.43	4.575	45.753	0.8388	High	22.64	22.77	4.58	45.801	0.7408	High	22.37
ULK1c+NDP52	103	122	YQKKKSRWPFSDECIPWEVW	32.94	3	16	32.62	32.79	4.299	26.866	0.8329	High	32.63	32.81	4.086	25.539	0.8032	High	32.65	32.85	4.109	25.681	0.7504	High	32.49	32.71	4.895	30.594	0.8377	High	32.5	32.65	4.744	29.648	0.7656	High	32.45	32.54	4.598	28.74	0.8088	High	32.57	32.81	4.988	31.172	0.7662	High	32.46
ULK1c+NDP52	123	131	TVKVHVVAL	20.93	2	7	20.8	20.97	1.282	18.311	0.9132	High	20.67	20.91	1.251	17.876	0.9088	High	20.76	20.93	1.225	17.496	0.9095	High	20.55	20.59	1.667	23.81	0.9007	High	20.52	20.74	1.615	23.07	0.9308	High	20.55	20.61	1.649	23.56	0.914	High	20.76	20.93	2.532	36.17	0.9085	High	20.46
ULK1c+NDP52	132	142	ATEQERQICRE	15.02	2	9	14.99	15.16	6.138	68.198	0.9001	High	14.76	14.99	6.136	68.175	0.9183	High	14.62	15.12	6.046	67.175	0.9084	High	14.63	14.84	6.608	73.418	0.8743	High	14.49	14.86	6.512	72.354	0.8984	High	14.56	14.68	6.457	71.742	0.9245	High	14.91	15.21	6.502	72.247	0.8689	High	14.5
ULK1c+NDP52	132	148	ATEQERQICREKVGEKL	19.73	3	15	19.31	19.41	7.088	47.253	0.776	High	19.28	19.47	6.903	46.019	0.6946	High	19.24	19.38	6.946	46.309	0.6957	High	19.08	19.18	9.215	61.433	0.6248	High	19.12	19.28	9.312	62.082	0.5825	High	19.02	19.17	9.177	61.177	0.7501	High	19.25	19.39	10.39	69.264	0.8378	High	18.97
ULK1c+NDP52	143	150	KVGEKLCE	14.95	2	6	14.71	14.96	0.332	5.527	0.8618	High	14.79	14.85	0.39	6.506	0.9005	High	14.56	14.82	0.358	5.971	0.883	High	14.36	14.59	1.292	21.539	0.8814	High	14.39	14.57	1.32	21.998	0.8762	High	14.39	14.56	1.284	21.394	0.8802	High	14.78	15	2.865	47.75	0.8724	High	14.29
ULK1c+NDP52	149	154	CEKIIN	13.52	2	4	13.33	13.54	0.038	0.956	0.7751	High	13.24	13.5	0.029	0.728	0.7815	High	13.25	13.42	0.056	1.396	0.7928	High	12.99	13.13	0.062	1.543	0.7993	High	13.09	13.4	0.028	0.699	0.766	High	12.98	13.25	0.024	0.609	0.7764	High	13.34	13.51	0.154	3.849	0.8496	High	13.2
ULK1c+NDP52	151	157	KIINIVE	20.37	2	5	20.23	20.33	0.03	0.597	0.8063	High	20.09	20.29	0.024	0.47	0.8006	High	20	20.2	0.037	0.74	0.8233	High	20.02	20.05	0.015	0.303	0.7444	High	19.93	19.99	0.068	1.363	0.8628	High	19.9	19.97	0.054	1.075	0.8187	High	20.16	20.19	0.05	1.006	0.8393	High	19.82
ULK1c+NDP52	158	173	VMNRHEYLPKMPTQSE	20.73	2	12							20.38	20.61	4.743	39.523	0.8488	High	20.38	20.72	4.603	38.36	0.8961	High	20.23	20.44	6.46	53.83	0.8401	High	20.21	20.4	6.261	52.176	0.8107	High	20.11	20.34	6.352	52.929	0.8449	High							20.3
ULK1c+NDP52	158	173	VMNRHEYLPKMPTQSE	20.73	3	12	20.61	20.8	4.878	40.653	0.8646	High	20.46	20.74	4.736	39.468	0.9186	High	20.32	20.62	4.64	38.67	0.8902	High	20.29	20.47	6.373	53.105	0.8697	High	20.24	20.39	6.351	52.923	0.8592	High	20.19	20.42	6.207	51.723	0.8763	High							20.15
ULK1c+NDP52	158	175	VMNRHEYLPKMPTQSEVD	21.57	2	14	21.26	21.39	5.37	38.358	0.6162	High	21.26	21.41	4.909	35.066	0.6413	High	21.23	21.41	4.982	35.587	0.6891	High	21.08	21.25	6.822	48.731	0.6911	High	21.06	21.2	6.754	48.24	0.6565	High													21.05
ULK1c+NDP52	158	175	VMNRHEYLPKMPTQSEVD	21.57	3	14	21.31	21.49	5.172	36.944	0.884	High	21.3	21.45	5.089	36.348	0.9155	High	21.11	21.58	5.085	36.325	0.8818	High	21.08	21.29	7.276	51.97	0.8932	High	21.06	21.34	7.181	51.291	0.9215	High	21.02	21.25	7.055	50.391	0.8825	High							21.02
ULK1c+NDP52	158	178	VMNRHEYLPKMPTQSEVDNVF	25.98	2	17	26.02	26.09	5.25	30.884	0.8891	High	25.82	26.04	4.968	29.222	0.8821	High	25.75	25.98	4.808	28.283	0.8632	High	25.66	25.88	7.099	41.758	0.8808	High	25.63	25.86	7.111	41.828	0.8705	High	25.61	25.84	7.041	41.418	0.8918	High							25.61
ULK1c+NDP52	158	178	VMNRHEYLPKMPTQSEVDNVF	25.98	3	17	25.85	26.04	5.266	30.978	0.9352	High	25.81	25.98	4.999	29.406	0.9162	High	25.78	26.04	4.845	28.497	0.936	High	25.68	25.85	7.087	41.689	0.9075	High	25.56	25.85	7.129	41.936	0.8928	High	25.56	25.86	6.955	40.911	0.9042	High							25.61
ULK1c+NDP52	158	182	VMNRHEYLPKMPTQSEVDNVFDTGL	28.32	3	21	28.26	28.34	5.204	24.782	0.7644	High	28.17	28.45	5.034	23.971	0.8576	High	28.25	28.34	4.861	23.148	0.8005	High	28.05	28.18	7.796	37.123	0.8377	High	28.08	28.2	7.588	36.133	0.8102	High	28	28.07	7.424	35.354	0.8263	High	28.24	28.3	9.043	43.061	0.7506	High	27.98
ULK1c+NDP52	179	189	DTGLRDVQPYL	22.95	2	8	22.79	22.93	1.025	12.808	0.8644	High	22.77	22.88	0.998	12.47	0.8676	High	22.81	22.91	0.999	12.491	0.8702	High	22.59	22.74	1.276	15.954	0.757	High	22.56	22.75	1.315	16.441	0.8008	High	22.55	22.7	1.339	16.735	0.803	High	22.84	22.93	1.592	19.897	0.8429	High	22.58
ULK1c+NDP52	183	189	RDVQPYL	19.27	2	4	19	19.29	0.046	1.154	0.934	High	18.99	19.27	0.057	1.43	0.9309	High	19.01	19.3	0.044	1.096	0.9297	High	18.87	19.15	0.048	1.201	0.9343	High	18.84	18.96	0.04	0.997	0.9275	High	18.76	18.98	0.048	1.19	0.9323	High	19.01	19.12	0.096	2.407	0.9309	High	18.78
ULK1c+NDP52	190	194	YKISF	22.98	2	3	22.71	22.99	1.628	54.278	0.8206	High	22.81	22.85	1.642	54.721	0.842	High	22.61	22.78	1.618	53.932	0.7949	High	22.57	22.81	1.688	56.259	0.8369	High	22.51	22.75	1.7	56.672	0.8521	High	22.48	22.73	1.702	56.723	0.8302	High	22.71	22.92	1.67	55.663	0.8071	High	22.56
ULK1c+NDP52	195	205	QITDALGTSVT	19.02	2	9	18.83	19.06	5.751	63.904	0.844	High	18.85	18.99	5.818	64.645	0.7524	High	18.8	18.89	5.748	63.871	0.806	High	18.62	18.88	5.916	65.731	0.7813	High	18.74	18.92	6.009	66.764	0.7978	High	18.71	18.84	5.91	65.666	0.755	High	18.89	18.96	5.816	64.621	0.7945	High	18.62
ULK1c+NDP52	195	207	QITDALGTSVTTT	19.17	2	11	18.93	19.06	6.382	58.015	0.8892	High	18.84	19.01	6.279	57.082	0.8703	High	18.64	18.97	6.35	57.725	0.8724	High	18.8	18.97	6.608	60.075	0.7975	High	18.61	18.95	6.664	60.579	0.8437	High	18.63	19.07	6.625	60.225	0.7605	High	18.83	19.08	6.76	61.451	0.8556	High	18.65
ULK1c+NDP52	195	218	QITDALGTSVTTTMRRLIKDTLAL	36.26	3	22	36.05	36.23	15.178	68.989	0.7885	High	36.09	36.19	14.958	67.989	0.8727	High	36.11	36.27	15.115	68.706	0.8535	High	35.85	35.96	15.753	71.603	0.867	High	35.77	35.94	15.816	71.891	0.8065	High	35.69	36.08	15.73	71.502	0.8309	High	35.94	36.11	16.148	73.398	0.8474	High	35.96
FIP200							6s	ULK1c					6s	ULK1c					6s	ULK1c											60s	ULK1c												60s	ULK1c
State	Start	End	Sequence	Search RT	Charge	Max D	Start RT	End RT	#D	%D	Score	Conf	Start RT	End RT	#D	%D	Score	Conf	Start RT	End RT	#D	%D	Score	Conf	Start	End	Sequence	Search RT	Charge	Max D	Start RT	End RT	#D	%D	Score	Conf		Start	End	Sequence	Search RT	Charge	Max D	Start RT	End RT	#D	%D	Score	Conf
ULK1c	7	16	LVNTGTTLTF	23.29	2	8	23.38	23.79	2.015	25.193	0.874	High	23.32	23.78	2.074	25.926	0.8967	High	23.24	23.67	2.039	25.485	0.9061	High	7	16	LVNTGTTLTF	26.26	2	8	25.78	26.33	2.082	26.025	0.8993	High		7	16	LVNTGTTLTF	26.26	2	8	26.05	26.2	2.594	32.42	0.8892	High
ULK1c	20	45	LTVQTVADLKHAIQSKYKIAIQHQVL	28.47	2	24	28.46	28.56	3.238	13.491	0.7995	High	28.39	28.59	3.306	13.777	0.8498	High	28.29	28.53	3.299	13.744	0.8892	High	20	45	LTVQTVADLKHAIQSKYKIAIQHQVL	32.69	3	24	32.27	32.73	6.292	26.217	0.9326	High		20	45	LTVQTVADLKHAIQSKYKIAIQHQVL	32.69	3	24	32.59	32.99	6.157	25.654	0.9247	High
ULK1c	20	45	LTVQTVADLKHAIQSKYKIAIQHQVL	28.47	3	24	28.29	28.41	3.142	13.094	0.9284	High	28.25	28.77	3.347	13.945	0.9493	High	28.23	28.66	3.185	13.272	0.9517	High	20	45	LTVQTVADLKHAIQSKYKIAIQHQVL	32.69	4	24	32.34	32.59	6.638	27.66	0.9415	High		20	45	LTVQTVADLKHAIQSKYKIAIQHQVL	32.69	4	24	32.83	33.09	6.14	25.584	0.8659	High
ULK1c	20	45	LTVQTVADLKHAIQSKYKIAIQHQVL	28.47	4	24	28.29	28.51	3.112	12.967	0.9502	High	28.34	28.71	3.339	13.914	0.9577	High	28.3	28.56	3.184	13.267	0.95	High	21	45	TVQTVADLKHAIQSKYKIAIQHQVL	31.24	2	23	30.73	31.17	5.12	22.26	0.9421	High		21	45	TVQTVADLKHAIQSKYKIAIQHQVL	31.24	2	23	31.09	31.36	5.187	22.554	0.8332	High
ULK1c	20	45	LTVQTVADLKHAIQSKYKIAIQHQVL	28.47	5	24	28.41	28.74	3.059	12.744	0.8945	High	28.3	28.6	3.224	13.432	0.9257	High	28.31	28.6	3.245	13.519	0.9397	High	21	45	TVQTVADLKHAIQSKYKIAIQHQVL	31.24	3	23	30.74	31.12	5.242	22.792	0.9388	High		21	45	TVQTVADLKHAIQSKYKIAIQHQVL	31.24	3	23	31.01	31.51	5.188	22.558	0.953	High
ULK1c	21	45	TVQTVADLKHAIQSKYKIAIQHQVL	28.73	2	23	27.18	27.35	2.046	8.896	0.8295	High	27.04	27.45	2.27	9.869	0.9247	High	26.99	27.27	2.137	9.292	0.9211	High	21	45	TVQTVADLKHAIQSKYKIAIQHQVL	31.24	4	23	30.74	31.11	5.496	23.894	0.9423	High		21	45	TVQTVADLKHAIQSKYKIAIQHQVL	31.24	4	23	31.19	31.57	5.259	22.864	0.9255	High
ULK1c	21	45	TVQTVADLKHAIQSKYKIAIQHQVL	28.73	3	23	27.1	27.23	2.075	9.023	0.9555	High	27.01	27.48	2.223	9.667	0.9534	High	26.96	27.41	2.115	9.194	0.9502	High	54	73	AADRRVCTYSAGTDTNPIFL	29.16	2	17	28.08	28.7	7.389	43.462	0.9254	High		54	73	AADRRVCTYSAGTDTNPIFL	29.16	2	17	28.6	29.13	6.919	40.699	0.9173	High
ULK1c	21	45	TVQTVADLKHAIQSKYKIAIQHQVL	28.73	4	23	27	27.23	2.1	9.131	0.9499	High	27.02	27.52	2.254	9.799	0.956	High	26.94	27.56	2.128	9.253	0.9543	High	62	72	YSAGTDTNPIF	24.87	2	8	24.19	24.5	1.935	24.193	0.8752	High		62	72	YSAGTDTNPIF	24.87	2	8	24.87	25.02	2.192	27.399	0.8388	High
ULK1c	21	45	TVQTVADLKHAIQSKYKIAIQHQVL	28.73	5	23	26.98	27.26	2.065	8.978	0.916	High	26.99	27.54	2.239	9.733	0.9216	High	26.94	27.48	2.124	9.236	0.9483	High	62	73	YSAGTDTNPIFL	28.11	2	9	27.52	28.04	2.084	23.151	0.9253	High		62	73	YSAGTDTNPIFL	28.11	2	9	27.87	28.26	2.362	26.241	0.8798	High
ULK1c	28	45	LKHAIQSKYKIAIQHQVL	22.02	3	16	22.17	22.35	1.623	10.143	0.5976	High	21.93	22.27	1.728	10.801	0.7643	High	21.97	22.18	1.83	11.436	0.8725	High	73	77	LFNKE	14.75	2	3	14.09	14.23	0.046	1.534	0.8696	High		73	77	LFNKE	14.75	2	3	14.74	14.92	0.03	0.994	0.8518	High
ULK1c	62	72	YSAGTDTNPIF	22.16	2	8	22.48	22.6	2.027	25.334	0.8679	High	22.14	22.55	2.079	25.981	0.8619	High	22.07	22.48	2.032	25.4	0.7349	High	74	80	FNKEMIL	26.11	2	5	25.37	25.67	2.179	43.589	0.8723	High		74	80	FNKEMIL	26.11	2	5	25.79	26.24	2.057	41.131	0.8493	High
ULK1c	62	73	YSAGTDTNPIFL	25.56	2	9	25.22	25.59	2.173	24.147	0.8862	High	25.18	25.81	2.271	25.234	0.916	High	25.12	25.61	2.175	24.168	0.9091	High	81	92	CDRPPAIPKTTF	23.38	2	7	22.9	23.15	4.226	60.374	0.902	High		81	92	CDRPPAIPKTTF	23.38	2	7	23.07	23.71	4.002	57.176	0.9005	High
ULK1c	73	77	LFNKE	14.05	2	3	14.1	14.41	0.023	0.781	0.8327	High	14.49	14.8	0.018	0.599	0.811	High	13.98	14.04	0.016	0.549	0.8062	High	81	92	CDRPPAIPKTTF	23.38	3	7	22.79	22.95	4.284	61.197	0.9013	High		81	92	CDRPPAIPKTTF	23.38	3	7	23.25	23.55	4.019	57.419	0.8699	High
ULK1c	73	80	LFNKEMIL	25.78	2	6	25.92	26.23	1.848	30.803	0.8024	High	25.79	26.21	1.95	32.503	0.8526	High	25.61	26.04	1.871	31.183	0.8145	High	81	99	CDRPPAIPKTTFSTENDME	23.82	2	14	23.29	23.76	7.873	56.233	0.8924	High		81	99	CDRPPAIPKTTFSTENDME	23.82	2	14	23.76	24.02	7.337	52.405	0.8698	High
ULK1c	74	80	FNKEMIL	22.97	2	5	23.04	23.23	1.765	35.293	0.828	High	23.06	23.4	1.851	37.019	0.8273	High	23.05	23.26	1.796	35.926	0.8222	High	81	99	CDRPPAIPKTTFSTENDME	23.82	3	14	23.25	23.73	7.944	56.741	0.9153	High		81	99	CDRPPAIPKTTFSTENDME	23.82	3	14	23.77	24.03	7.369	52.632	0.876	High
ULK1c	81	92	CDRPPAIPKTTF	20.66	2	7	20.93	21.33	4.572	65.313	0.8081	High	20.93	21.23	4.592	65.596	0.9113	High	20.88	21.4	4.56	65.136	0.8991	High	82	92	DRPPAIPKTTF	22.58	2	6	22.26	22.52	3.822	63.702	0.9046	High		82	92	DRPPAIPKTTF	22.58	2	6	22.63	23.01	3.633	60.546	0.8615	High
ULK1c	81	92	CDRPPAIPKTTF	20.66	3	7	20.76	21.19	4.693	67.042	0.8829	High	20.67	21.19	4.672	66.744	0.8611	High	20.69	21.1	4.665	66.641	0.8564	High	106	121	LMMPAVFHTVASRTQL	32.55	2	13	31.86	32.16	7.461	57.394	0.9085	High		106	121	LMMPAVFHTVASRTQL	32.55	2	13	32.27	32.6	7.325	56.344	0.4459	High
ULK1c	81	97	CDRPPAIPKTTFSTEND	19.85	3	12	19.81	20.1	7.451	62.092	0.8108	High	19.76	20.05	7.47	62.252	0.7832	High	19.69	19.87	7.285	60.711	0.8766	High	109	121	PAVFHTVASRTQL	24.06	3	11	23.59	23.96	6.25	56.821	0.8832	High		109	121	PAVFHTVASRTQL	24.06	3	11	23.98	24.26	6.162	56.019	0.8718	High
ULK1c	81	99	CDRPPAIPKTTFSTENDME	21.24	3	14	21.21	21.6	8.651	61.794	0.8647	High	21.23	21.52	8.532	60.943	0.8782	High	21.09	21.49	8.473	60.521	0.8664	High	113	121	HTVASRTQL	15.82	2	7	14.91	15.17	3.828	54.679	0.895	High		113	121	HTVASRTQL	15.82	2	7	15.37	15.62	3.754	53.625	0.8709	High
ULK1c	82	92	DRPPAIPKTTF	20.17	2	6	20.31	20.74	4.071	67.853	0.8801	High	20.27	20.8	4.146	69.108	0.9051	High	20.17	20.55	4.083	68.048	0.9096	High	125	135	MYEVAKKLCSF	29.27	2	9	28.83	29.1	1.138	12.649	0.9095	High		125	135	MYEVAKKLCSF	29.27	2	9	29.27	29.67	0.955	10.609	0.8613	High
ULK1c	100	105	IKVEES	11.46	2	4	11.61	11.7	0.151	3.78	0.8395	High	12.35	12.56	0.202	5.047	0.8751	High	11.25	11.66	0.204	5.094	0.8786	High	126	135	YEVAKKLCSF	26	2	8	25.62	25.98	1.026	12.824	0.9212	High		126	135	YEVAKKLCSF	26	2	8	26.19	26.34	0.995	12.434	0.9136	High
ULK1c	113	121	HTVASRTQL	15.11	2	7	14.58	14.66	2.37	33.855	0.7819	High	14.89	15.41	2.454	35.064	0.9086	High	14.34	14.89	2.399	34.274	0.9146	High	135	150	FCEGLVHDEHLQHQGW	27.91	3	14	27.07	27.38	0.802	5.73	0.9254	High		135	150	FCEGLVHDEHLQHQGW	27.91	3	14	27.54	27.82	0.555	3.967	0.8261	High
ULK1c	113	122	HTVASRTQLA	13.22	2	8	13.33	13.62	2.422	30.274	0.8347	High	13.74	13.91	2.507	31.34	0.8497	High	13.02	13.47	2.439	30.492	0.8836	High	136	150	CEGLVHDEHLQHQGW	25.09	2	13	24.59	24.82	0.675	5.19	0.9573	High		136	150	CEGLVHDEHLQHQGW	25.09	2	13	25	25.09	0.573	4.408	0.9	High
ULK1c	125	135	MYEVAKKLCSF	25.71	2	9	25.81	25.93	0.221	2.461	0.0913	High	25.75	26	0.254	2.823	0.9032	High	25.66	25.9	0.242	2.684	0.8905	High	136	150	CEGLVHDEHLQHQGW	25.09	3	13	24.5	24.91	0.635	4.882	0.9516	High		136	150	CEGLVHDEHLQHQGW	25.09	3	13	24.9	25.11	0.598	4.6	0.9322	High
ULK1c	126	135	YEVAKKLCSF	23.18	2	8	23.14	23.35	0.204	2.552	0.9146	High	23.05	23.45	0.237	2.966	0.9108	High	22.99	23.35	0.231	2.894	0.9175	High	136	154	CEGLVHDEHLQHQGWAAIM	29.9	2	17	29.36	29.69	0.845	4.972	0.9405	High		136	154	CEGLVHDEHLQHQGWAAIM	29.9	2	17	29.82	30.2	0.629	3.703	0.7614	High
ULK1c	126	135	YEVAKKLCSF	23.18	3	8	23.12	23.41	0.144	1.804	0.8018	High	23.08	23.42	0.181	2.259	0.8263	High	23.02	23.29	0.188	2.355	0.8273	High	139	150	LVHDEHLQHQGW	22.39	2	10	22.04	22.3	0.446	4.463	0.8973	High		139	150	LVHDEHLQHQGW	22.39	2	10	22.44	22.83	0.484	4.839	0.8682	High
ULK1c	135	150	FCEGLVHDEHLQHQGW	24.24	3	14	24.18	24.35	0.174	1.244	0.8333	High	24.17	24.56	0.245	1.752	0.8655	High	24.09	24.55	0.23	1.641	0.869	High	158	169	EDCSNSYQKLLF	29.43	2	10	28.99	29.21	1.351	13.505	0.9291	High		158	169	EDCSNSYQKLLF	29.43	2	10	29.47	30.16	1.299	12.985	0.8845	High
ULK1c	136	150	CEGLVHDEHLQHQGW	21.96	2	13	22.13	22.54	0.267	2.05	0.9478	High	22.11	22.41	0.309	2.378	0.9534	High	22.04	22.42	0.288	2.217	0.9514	High	164	169	YQKLLF	27.97	2	4	27.47	27.75	0.191	4.781	0.9273	High		164	169	YQKLLF	27.97	2	4	28.18	28.37	0.171	4.287	0.9099	High
ULK1c	136	150	CEGLVHDEHLQHQGW	21.96	3	13	22.08	22.62	0.265	2.038	0.9344	High	22.04	22.65	0.294	2.262	0.9371	High	21.99	22.53	0.318	2.449	0.9374	High	168	178	LFKFESIYSNY	31.36	2	9	30.99	31.2	1.225	13.615	0.9252	High		168	178	LFKFESIYSNY	31.36	2	9	31.38	31.4	1.154	12.817	0.8602	High
ULK1c	139	150	LVHDEHLQHQGW	19.97	3	10	20.01	20.33	0.159	1.59	0.906	High	19.99	20.41	0.176	1.759	0.8826	High	19.92	20.29	0.209	2.089	0.9118	High	170	178	KFESIYSNY	24.68	2	7	24	24.4	1.194	17.061	0.9302	High		170	178	KFESIYSNY	24.68	2	7	24.45	24.62	1.163	16.616	0.8788	High
ULK1c	158	167	EDCSNSYQKL	16.97	2	8	17.22	17.38	0.979	12.232	0.3965	High	17.22	17.32	0.982	12.272	0.6528	High	16.88	17.35	0.884	11.046	0.6958	High	185	194	IKLKLTHLGT	23.81	2	8	23.33	23.73	1.621	20.259	0.9091	High		185	194	IKLKLTHLGT	23.81	2	8	23.78	24.06	1.827	22.843	0.9107	High
ULK1c	158	169	EDCSNSYQKLLF	26	2	10	26.12	26.76	0.611	6.109	0.7628	High	26.08	26.68	0.757	7.567	0.7615	High	26.03	26.51	0.748	7.477	0.7533	High	185	199	IKLKLTHLGTAVSVM	28.77	2	13	28.49	28.76	3.147	24.208	0.8817	High		185	199	IKLKLTHLGTAVSVM	28.77	2	13	28.45	28.74	3.187	24.513	0.7922	High
ULK1c	164	169	YQKLLF	24.82	2	4	24.74	25.32	0.027	0.677	0.8744	High	24.88	25.03	0.034	0.853	0.8687	High	24.8	24.93	0.023	0.581	0.8566	High	188	194	KLTHLGT	15.46	2	5	14.91	15.14	1.31	26.207	0.839	High		188	194	KLTHLGT	15.46	2	5	15.49	15.69	1.475	29.497	0.8593	High
ULK1c	168	174	LFKFESI	26.42	2	5	26.26	26.45	0.033	0.657	0.8308	High	26.31	26.72	0.045	0.907	0.8618	High	26.28	26.39	0.029	0.571	0.839	High	199	207	MAKIPLLEC	30.44	2	6	29.96	30.24	1.136	18.938	0.8623	High		199	207	MAKIPLLEC	30.44	2	6	30.35	30.9	1.326	22.101	0.8581	High
ULK1c	168	178	LFKFESIYSNY	27.58	2	9	27.77	27.88	0.224	2.485	0.9083	High	27.48	28	0.317	3.518	0.9193	High	27.46	27.94	0.284	3.156	0.9093	High	200	207	AKIPLLEC	27.56	2	5	27.2	27.58	1.1	21.993	0.8914	High		200	207	AKIPLLEC	27.56	2	5	27.61	28.22	1.446	28.922	0.8889	High
ULK1c	169	178	FKFESIYSNY	26.02	2	8	26.18	26.32	0.112	1.396	0.8192	High	26.01	26.18	0.201	2.51	0.8345	High	25.97	26.15	0.159	1.984	0.8474	High	208	217	LTRHSYRECL	21.77	3	8	21.15	21.6	3.741	46.757	0.8781	High		208	217	LTRHSYRECL	21.77	3	8	21.6	21.9	3.518	43.976	0.8832	High
ULK1c	170	178	KFESIYSNY	21.86	2	7	22.12	22.2	0.197	2.81	0.9187	High	21.85	22.54	0.287	4.099	0.9189	High	21.83	22.21	0.272	3.881	0.9309	High	218	240	GRLDSLPEHEDSEKAEMKRSTEL	24.25	3	20	23.35	23.67	9.85	49.252	0.9041	High		218	240	GRLDSLPEHEDSEKAEMKRSTEL	24.25	3	20	23.83	24.13	9.963	49.813	0.8593	High
ULK1c	170	179	KFESIYSNYL	26.13	2	8	26.03	26.38	0.124	1.548	0.8349	High	26	26.39	0.264	3.297	0.836	High	25.97	26.28	0.228	2.855	0.8869	High	221	234	DSLPEHEDSEKAEM	18.19	2	11	17.88	18.3	4.931	44.827	0.9069	High		221	234	DSLPEHEDSEKAEM	18.19	2	11	18.22	18.52	4.517	41.061	0.9279	High
ULK1c	179	199	LQSIEDIKLKLTHLGTAVSVM	29.86	3	19	29.62	29.91	2.622	13.801	0.9037	High	29.66	29.87	2.929	15.416	0.884	High	29.51	29.9	2.744	14.442	0.8407	High	221	239	DSLPEHEDSEKAEMKRSTE	18.4	3	16	17.75	18.3	8.325	52.029	0.9239	High		221	239	DSLPEHEDSEKAEMKRSTE	18.4	3	16	18.27	18.53	7.773	48.581	0.9012	High
ULK1c	184	194	DIKLKLTHLGT	21.98	2	9	21.91	22.34	1.032	11.47	0.6406	High	21.97	22.23	0.941	10.453	0.8958	High	21.83	22.2	1.038	11.528	0.9128	High	221	240	DSLPEHEDSEKAEMKRSTEL	22.51	3	17	21.52	21.74	8.96	52.704	0.865	High		221	240	DSLPEHEDSEKAEMKRSTEL	22.51	3	17	21.95	22.44	7.978	46.928	0.7997	High
ULK1c	184	199	DIKLKLTHLGTAVSVM	25.84	2	14	25.92	26.11	1.471	10.51	0.7454	High	25.95	26.09	1.737	12.409	0.7393	High	25.92	25.98	1.57	11.212	0.9012	High	240	252	LVLSPDMPRTTNE	22.6	2	9	22.25	22.64	5.609	62.318	0.9133	High		240	252	LVLSPDMPRTTNE	22.6	2	9	22.61	23.1	5.275	58.612	0.9251	High
ULK1c	185	194	IKLKLTHLGT	21	2	8	20.99	21.39	1.017	12.707	0.5959	High	20.97	21.38	0.948	11.855	0.8849	High	20.93	21.33	0.942	11.78	0.918	High	240	254	LVLSPDMPRTTNESL	25.98	2	11	25.47	25.86	6.638	60.344	0.9318	High		240	254	LVLSPDMPRTTNESL	25.98	2	11	25.87	26.16	6.244	56.761	0.8919	High
ULK1c	185	198	IKLKLTHLGTAVSV	23.7	2	12	23.76	23.82	1.436	11.968	0.7338	High	23.96	24.2	1.654	13.782	0.9366	High	23.68	24.19	1.581	13.173	0.928	High	241	252	VLSPDMPRTTNE	18.95	2	8	18.53	18.95	4.935	61.687	0.9253	High		241	252	VLSPDMPRTTNE	18.95	2	8	18.9	19.13	4.664	58.299	0.9195	High
ULK1c	185	198	IKLKLTHLGTAVSV	23.7	3	12	23.81	23.86	1.488	12.403	0.6756	High	23.78	24.27	1.587	13.221	0.8908	High	23.7	24.1	1.451	12.094	0.924	High	255	263	LTSFPKSVE	20.47	2	6	19.94	20.21	4.146	69.099	0.797	High		255	263	LTSFPKSVE	20.47	2	6	20.49	20.69	4.067	67.775	0.7423	High
ULK1c	185	199	IKLKLTHLGTAVSVM	24.97	2	13	24.85	25.03	1.633	12.561	0.8164	High	24.92	25.41	1.677	12.896	0.936	High	24.9	25.37	1.576	12.123	0.9509	High	255	277	LTSFPKSVEHVSPDTADAESGKE	22.13	3	19	21.68	21.91	10.504	55.284	0.9384	High		255	277	LTSFPKSVEHVSPDTADAESGKE	22.13	3	19	21.89	22.35	9.655	50.814	0.9173	High
ULK1c	185	199	IKLKLTHLGTAVSVM	24.97	3	13	24.97	25.03	1.443	11.101	0.7918	High	24.97	25.4	1.644	12.645	0.9368	High	24.88	25.38	1.545	11.888	0.9376	High	255	280	LTSFPKSVEHVSPDTADAESGKEIRE	23.29	3	22	22.76	23.06	12.376	56.254	0.8694	High		255	280	LTSFPKSVEHVSPDTADAESGKEIRE	23.29	3	22	23.1	23.41	11.807	53.67	0.8316	High
ULK1c	188	194	KLTHLGT	14.42	2	5	14.5	14.6	0.842	16.843	0.7985	High	14.8	15.17	0.85	16.992	0.8482	High	14.26	14.59	0.913	18.259	0.8848	High	256	263	TSFPKSVE	17.85	2	5	17.36	17.42	3.333	66.666	0.7812	High		256	263	TSFPKSVE	17.85	2	5	17.72	17.84	3.361	67.217	0.7825	High
ULK1c	199	207	MAKIPLLEC	27.09	2	6	26.64	27.35	1.313	21.89	0.5767	High	26.77	27.03	1.28	21.328	0.8505	High	26.68	27.09	1.237	20.616	0.8454	High	256	277	TSFPKSVEHVSPDTADAESGKE	20.63	2	18	20.23	20.55	9.837	54.65	0.8829	High		256	277	TSFPKSVEHVSPDTADAESGKE	20.63	2	18	20.55	20.88	9.518	52.878	0.8787	High
ULK1c	200	207	AKIPLLEC	24.45	2	5	24.34	24.46	1.328	26.559	0.6433	High	24.49	24.89	1.319	26.373	0.8695	High	24.36	24.89	1.31	26.208	0.8693	High	256	277	TSFPKSVEHVSPDTADAESGKE	20.63	3	18	20.52	20.66	9.84	54.669	0.9031	High		256	277	TSFPKSVEHVSPDTADAESGKE	20.63	3	18	20.52	20.81	9.466	52.589	0.9089	High
ULK1c	208	217	LTRHSYRECL	19.18	3	8	19.32	19.75	3.891	48.64	0.8399	High	19.31	19.73	3.926	49.079	0.8447	High	19.19	19.61	3.872	48.402	0.8862	High	256	280	TSFPKSVEHVSPDTADAESGKEIRE	22.2	3	21	21.58	21.94	11.66	55.525	0.8294	High		256	280	TSFPKSVEHVSPDTADAESGKEIRE	22.2	3	21	21.94	22.25	11.06	52.668	0.8405	High
ULK1c	218	239	GRLDSLPEHEDSEKAEMKRSTE	18.69	3	19	18.74	18.85	9.834	51.76	0.8129	High	18.74	18.88	9.662	50.851	0.8347	High	18.62	18.78	9.684	50.969	0.8135	High	264	277	HVSPDTADAESGKE	12.43	2	11	11.88	12.04	6.5	59.093	0.8775	High		264	277	HVSPDTADAESGKE	12.43	2	11	12.31	12.63	5.967	54.248	0.8891	High
ULK1c	221	234	DSLPEHEDSEKAEM	16.79	2	11	16.88	17.18	5.502	50.018	0.8785	High	16.86	17.12	5.532	50.295	0.8875	High	16.66	16.83	5.342	48.562	0.8593	High	294	304	IDTKDGDLPFF	32.73	2	8	31.12	31.63	3.161	39.511	0.8876	High		278	293	IRESCQSTVHQQDETT	13.99	2	14	13.79	14.35	7.875	56.247	0.7194	High
ULK1c	221	239	DSLPEHEDSEKAEMKRSTE	16.67	3	16	16.7	16.96	8.759	54.744	0.7788	High	16.61	16.97	9.011	56.318	0.6842	High	16.49	16.75	8.819	55.122	0.8179	High	309	324	LDWINVQDRPNDVESL	30.53	2	13	29.64	30.13	4.47	34.383	0.919	High		294	304	IDTKDGDLPFF	32.73	2	8	31.65	32.15	2.992	37.404	0.9073	High
ULK1c	221	240	DSLPEHEDSEKAEMKRSTEL	19.93	3	17	19.77	20.06	9.362	55.072	0.9063	High	19.76	19.93	9.38	55.174	0.9065	High	19.62	19.83	9.511	55.947	0.921	High	311	324	WINVQDRPNDVESL	27.06	2	11	26.6	26.83	4.975	45.224	0.8931	High		309	324	LDWINVQDRPNDVESL	30.53	2	13	29.99	30.62	4.713	36.252	0.9137	High
ULK1c	240	252	LVLSPDMPRTTNE	20.18	2	9	20.44	20.72	6.14	68.224	0.9053	High	20.46	20.67	6.121	68.006	0.9225	High	20.32	20.62	6.118	67.979	0.9147	High	315	324	QDRPNDVESL	19.3	2	7	18.88	19.02	3.774	53.915	0.7632	High		311	324	WINVQDRPNDVESL	27.06	2	11	26.99	27.27	4.975	45.227	0.8448	High
ULK1c	240	254	LVLSPDMPRTTNESL	23.16	2	11	23.11	23.43	7.327	66.611	0.8808	High	23.09	23.39	7.324	66.584	0.9052	High	22.91	23.27	7.292	66.291	0.8981	High	325	346	VRKCFDSMSRLDPRIIRPFIAE	31.29	3	18	30.67	30.93	3.609	20.052	0.8073	High		315	324	QDRPNDVESL	19.3	2	7	19.36	19.71	3.698	52.826	0.8666	High
ULK1c	241	252	VLSPDMPRTTNE	17.25	2	8	17.43	17.82	5.349	66.862	0.8951	High	17.54	17.7	5.42	67.752	0.9133	High	17.27	17.54	5.392	67.401	0.9142	High	348	369	RQTIAKLDNQNMKAIKGLEDRL	30.71	3	20	30.14	30.48	11.458	57.289	0.9303	High		325	346	VRKCFDSMSRLDPRIIRPFIAE	31.29	3	18	30.96	31.54	4.316	23.978	0.9117	High
ULK1c	241	254	VLSPDMPRTTNESL	20.6	2	10	20.69	21.02	6.728	67.279	0.928	High	20.66	20.93	6.695	66.947	0.9059	High	20.49	20.91	6.608	66.082	0.9182	High	376	382	IASCGRL	18.11	2	5	17.77	18.16	2.193	43.853	0.847	High		348	369	RQTIAKLDNQNMKAIKGLEDRL	30.71	3	20	30.48	30.85	11.712	58.558	0.8936	High
ULK1c	255	277	LTSFPKSVEHVSPDTADAESGKE	19.71	3	19	19.77	20	11.376	59.876	0.8373	High	19.72	20.01	11.453	60.278	0.8896	High	19.52	19.84	11.392	59.955	0.8987	High	383	393	VNEQKELAQGF	23.17	2	9	22.55	22.82	0.751	8.339	0.9159	High		376	382	IASCGRL	18.11	2	5	18.2	18.35	2.239	44.785	0.8417	High
ULK1c	256	277	TSFPKSVEHVSPDTADAESGKE	18.58	2	18	18.65	18.85	10.975	60.97	0.8576	High	18.44	19.01	10.732	59.623	0.8978	High	18.52	18.89	10.817	60.096	0.9094	High	383	405	VNEQKELAQGFLANQKRAENLKD	26.56	3	21	25.9	26.24	9.548	45.465	0.8693	High		383	393	VNEQKELAQGF	23.17	2	9	22.98	23.22	0.731	8.123	0.8801	High
ULK1c	256	277	TSFPKSVEHVSPDTADAESGKE	18.58	3	18	18.67	18.8	10.763	59.794	0.9231	High	18.59	18.91	10.837	60.205	0.9148	High	18.46	18.79	10.741	59.674	0.9025	High	414	421	LSHANQLM	18.68	2	6	18.11	18.4	2.544	42.395	0.7785	High		383	394	VNEQKELAQGFL	27.4	2	10	27.41	27.68	1.814	18.144	0.833	High
ULK1c	256	280	TSFPKSVEHVSPDTADAESGKEIRE	19.74	3	21	19.52	20.05	12.472	59.391	0.7612	High	19.59	19.97	12.456	59.316	0.7498	High	19.62	19.92	12.186	58.03	0.7651	High	422	432	IMLQNHRKLLD	22.71	2	9	22.26	22.5	0.098	1.094	0.8807	High		383	405	VNEQKELAQGFLANQKRAENLKD	26.56	3	21	26.2	26.81	9.632	45.866	0.8615	High
ULK1c	264	277	HVSPDTADAESGKE	12.02	2	11	12.16	12.63	6.719	61.079	0.9009	High	12.85	13.26	6.612	60.107	0.9331	High	11.53	12.52	6.733	61.205	0.8912	High	422	448	IMLQNHRKLLDIKQKCTTAKQELANNL	29.4	3	25	28.67	29.11	4.553	18.212	0.9365	High		414	421	LSHANQLM	18.68	2	6	18.57	18.79	2.412	40.193	0.7841	High
ULK1c	278	293	IRESCQSTVHQQDETT	13.51	2	14	13.54	13.99	8.653	61.804	0.8291	High	13.94	14.07	8.471	60.507	0.8656	High	13.32	13.61	8.581	61.291	0.8678	High	424	448	LQNHRKLLDIKQKCTTAKQELANNL	27.98	3	23	27.46	27.84	4.663	20.275	0.9134	High		422	432	IMLQNHRKLLD	22.71	2	9	22.61	22.75	0.099	1.104	0.8893	High
ULK1c	281	293	SCQSTVHQQDETT	11.35	2	11	10.8	11.38	6.97	63.36	0.9034	High	11.6	12.21	6.933	63.031	0.9058	High	10.68	11.23	6.957	63.242	0.9331	High	433	448	IKQKCTTAKQELANNL	22.24	2	14	21.88	22.09	4.238	30.272	0.9005	High		422	448	IMLQNHRKLLDIKQKCTTAKQELANNL	29.4	3	25	28.94	29.18	4.637	18.547	0.9216	High
ULK1c	294	304	IDTKDGDLPFF	27.76	2	8	27.9	28.33	3.784	47.299	0.806	High	27.75	28.38	3.82	47.748	0.9177	High	27.86	28.02	3.833	47.908	0.9141	High	433	448	IKQKCTTAKQELANNL	22.24	3	14	21.94	22.15	4.376	31.258	0.8943	High		424	448	LQNHRKLLDIKQKCTTAKQELANNL	27.98	3	23	27.73	27.98	4.655	20.238	0.8658	High
ULK1c	294	308	IDTKDGDLPFFNVSL	30.84	2	12	30.99	31.2	6.477	53.974	0.8323	High	30.83	31.16	6.584	54.863	0.8233	High	30.87	31.1	6.35	52.919	0.8538	High	449	457	HVRLKWCCF	32.06	2	7	31.6	31.89	0.916	13.085	0.9366	High		433	448	IKQKCTTAKQELANNL	22.24	2	14	22.28	22.5	4.419	31.563	0.87	High
ULK1c	309	324	LDWINVQDRPNDVESL	26.43	2	13	26.4	26.63	3.829	29.451	0.8577	High	26.51	26.81	3.822	29.398	0.8912	High	26.33	26.86	3.745	28.809	0.8896	High	457	469	FVMLHADQDGEKL	25.73	2	11	25.32	25.6	2.149	19.537	0.9097	High		433	448	IKQKCTTAKQELANNL	22.24	3	14	22.29	22.54	4.495	32.11	0.8114	High
ULK1c	311	324	WINVQDRPNDVESL	24.26	2	11	23.96	24.13	3.892	35.382	0.7369	High	23.94	24.19	3.773	34.305	0.8619	High	23.9	24.08	3.875	35.223	0.8537	High	457	472	FVMLHADQDGEKLQAL	28.14	2	14	27.68	28.04	2.07	14.784	0.9269	High		449	457	HVRLKWCCF	32.06	2	7	31.93	32.09	0.802	11.461	0.8625	High
ULK1c	314	324	VQDRPNDVESL	18.25	2	8	18.42	18.47	3.33	41.628	0.6104	High	18.32	18.56	3.42	42.756	0.8039	High	18.16	18.5	3.48	43.5	0.8409	High	457	472	FVMLHADQDGEKLQAL	28.14	3	14	27.64	27.97	2.009	14.352	0.9222	High		457	469	FVMLHADQDGEKL	25.73	2	11	25.76	25.97	1.967	17.883	0.872	High
ULK1c	325	332	VRKCFDSM	18.57	2	6	18.87	19.22	0.247	4.113	0.8528	High	18.91	19.34	0.27	4.492	0.8741	High	18.78	19.14	0.25	4.159	0.8793	High	458	472	VMLHADQDGEKLQAL	24.71	2	13	24.3	24.47	2.016	15.505	0.9234	High		457	472	FVMLHADQDGEKLQAL	28.14	2	14	28.21	28.34	1.786	12.759	0.82	High
ULK1c	325	346	VRKCFDSMSRLDPRIIRPFIAE	27.06	3	18	26.98	27.53	1.599	8.884	0.8378	High	27.08	27.25	1.78	9.889	0.9252	High	26.98	27.35	1.7	9.443	0.9167	High	458	472	VMLHADQDGEKLQAL	24.71	3	13	24.07	24.49	1.96	15.078	0.9392	High		457	472	FVMLHADQDGEKLQAL	28.14	3	14	28.08	28.3	1.776	12.689	0.8972	High
ULK1c	325	347	VRKCFDSMSRLDPRIIRPFIAEC	28.55	3	19	28.65	28.7	1.344	7.075	0.8594	High	28.47	28.77	1.568	8.254	0.9295	High	28.37	28.69	1.536	8.085	0.918	High	461	472	HADQDGEKLQAL	20.16	2	10	19.83	20.14	1.105	11.052	0.9142	High		458	472	VMLHADQDGEKLQAL	24.71	2	13	24.55	24.78	1.866	14.354	0.9173	High
ULK1c	333	347	SRLDPRIIRPFIAEC	26.4	3	11	26.59	26.68	0.683	6.208	0.9039	High	26.31	26.64	0.836	7.601	0.9311	High	26.12	26.55	0.826	7.511	0.9325	High	480	489	LERVKIVEAL	25.94	2	8	25.61	25.9	2.42	30.254	0.8667	High		458	472	VMLHADQDGEKLQAL	24.71	3	13	24.61	24.69	1.739	13.377	0.8676	High
ULK1c	347	369	CRQTIAKLDNQNMKAIKGLEDRL	27.38	3	21	27.06	27.36	10.155	48.357	0.8985	High	27.02	27.25	10.381	49.433	0.9333	High	26.99	27.16	10.227	48.701	0.9228	High	480	495	LERVKIVEALSTVPQM	30.52	3	13	30.01	30.33	4.262	32.782	0.8753	High		461	472	HADQDGEKLQAL	20.16	2	10	20.29	20.62	1.156	11.56	0.9326	High
ULK1c	347	369	CRQTIAKLDNQNMKAIKGLEDRL	27.38	4	21	27.06	27.33	10.343	49.252	0.8874	High	26.97	27.34	10.397	49.51	0.894	High	26.98	27.18	10.377	49.413	0.9086	High	500	520	VVEVVRRKMFIKHYREWAGAL	30.16	3	19	29.98	30.13	1.108	5.832	0.9271	High		480	489	LERVKIVEAL	25.94	2	8	25.89	26.18	2.212	27.647	0.8813	High
ULK1c	347	369	CRQTIAKLDNQNMKAIKGLEDRL	27.38	5	21	27.03	27.5	10.604	50.494	0.7188	High	27.12	27.44	10.655	50.739	0.8736	High	27.01	27.26	10.473	49.872	0.8767	High	503	515	VVRRKMFIKHYRE	20.55	3	11	20.37	20.67	0.509	4.624	0.9455	High		480	495	LERVKIVEALSTVPQM	30.52	3	13	30.4	30.57	4.039	31.069	0.7892	High
ULK1c	348	369	RQTIAKLDNQNMKAIKGLEDRL	26.86	2	20	26.64	26.95	10.473	52.366	0.7635	High	26.59	26.9	10.365	51.823	0.8039	High	26.53	26.88	10.108	50.538	0.7889	High	503	520	VVRRKMFIKHYREWAGAL	28.56	3	16	28.31	28.5	0.914	5.713	0.942	High		500	520	VVEVVRRKMFIKHYREWAGAL	30.16	3	19	30.26	30.49	1.128	5.936	0.8224	High
ULK1c	348	369	RQTIAKLDNQNMKAIKGLEDRL	26.86	3	20	26.55	26.77	10.22	51.1	0.8442	High	26.59	26.74	10.393	51.963	0.9155	High	26.47	26.71	10.351	51.754	0.913	High	521	538	VKDGKRLYEAEKSKRESF	21.51	3	16	21.03	21.36	2.129	13.307	0.8806	High		503	515	VVRRKMFIKHYRE	20.55	3	11	20.67	20.97	0.54	4.906	0.9376	High
ULK1c	348	369	RQTIAKLDNQNMKAIKGLEDRL	26.86	5	20	26.64	26.98	10.375	51.874	0.6679	High	26.74	26.91	10.401	52.003	0.7978	High	26.57	26.74	10.308	51.539	0.8806	High	521	541	VKDGKRLYEAEKSKRESFGKL	23.73	3	19	23.36	23.79	3.49	18.368	0.8603	High		503	520	VVRRKMFIKHYREWAGAL	28.56	3	16	28.6	28.93	1.177	7.357	0.912	High
ULK1c	362	369	IKGLEDRL	20.51	2	6	20.81	20.87	3.081	51.351	0.6325	High	20.72	20.98	3.063	51.055	0.791	High	20.67	20.89	3.068	51.139	0.8026	High	521	541	VKDGKRLYEAEKSKRESFGKL	23.73	4	19	23.3	23.82	3.6	18.947	0.8603	High		521	538	VKDGKRLYEAEKSKRESF	21.51	3	16	21.41	21.66	3.295	20.593	0.8534	High
ULK1c	376	405	IASCGRLVNEQKELAQGFLANQKRAENLKD	26.95	3	28	26.74	27.16	10.128	36.17	0.8636	High	26.7	27.14	10.339	36.926	0.9209	High	26.68	27.08	9.988	35.672	0.8947	High	528	541	YEAEKSKRESFGKL	21.99	3	12	21.43	21.77	2.796	23.298	0.9022	High		521	541	VKDGKRLYEAEKSKRESFGKL	23.73	3	19	23.79	24.12	5.42	28.526	0.8428	High
ULK1c	376	409	IASCGRLVNEQKELAQGFLANQKRAENLKDASVL	28.42	4	32	28.18	28.5	13.255	41.423	0.9105	High	28.2	28.45	13.188	41.212	0.8516	High	28.13	28.36	13.013	40.667	0.8779	High	552	562	FRGLDSWPPSF	34.48	2	7	33.57	34.09	3.17	45.287	0.8973	High		521	541	VKDGKRLYEAEKSKRESFGKL	23.73	4	19	23.74	24.22	5.389	28.362	0.8734	High
ULK1c	383	393	VNEQKELAQGF	20.67	2	9	20.71	20.82	0.269	2.993	0.8569	High	20.67	20.97	0.276	3.069	0.8712	High	20.63	20.91	0.266	2.951	0.8889	High	563	574	CTQKPRKFDCEL	23.94	2	9	23.54	24.04	4.444	49.381	0.8853	High		528	541	YEAEKSKRESFGKL	21.99	3	12	21.94	22.22	3.695	30.79	0.882	High
ULK1c	383	405	VNEQKELAQGFLANQKRAENLKD	23.33	3	21	23.27	23.54	8.777	41.797	0.7599	High	23.25	23.55	9.009	42.898	0.8366	High	23.24	23.47	8.726	41.552	0.857	High	575	581	PDISLKD	18.87	2	5	18.63	19.05	2.625	52.504	0.8059	High		552	562	FRGLDSWPPSF	34.48	2	7	34.12	34.47	2.803	40.048	0.897	High
ULK1c	383	405	VNEQKELAQGFLANQKRAENLKD	23.33	4	21	23.27	23.6	9.143	43.536	0.8675	High	23.26	23.47	8.989	42.803	0.9344	High	23.23	23.43	8.873	42.252	0.9061	High	575	583	PDISLKDLQ	25.25	2	7	24.83	25.04	2.549	36.413	0.8847	High		563	574	CTQKPRKFDCEL	23.94	2	9	24.16	24.37	4.461	49.566	0.8844	High
ULK1c	383	409	VNEQKELAQGFLANQKRAENLKDASVL	25.69	3	25	25.68	25.91	12.024	48.095	0.8718	High	25.65	25.82	12.139	48.556	0.8987	High	25.61	25.88	11.886	47.544	0.8836	High	575	584	PDISLKDLQF	31.79	2	8	31.32	31.65	2.849	35.607	0.8733	High		575	581	PDISLKD	18.87	2	5	18.86	19.22	2.709	54.183	0.8517	High
ULK1c	383	409	VNEQKELAQGFLANQKRAENLKDASVL	25.69	4	25	25.62	25.97	12.247	48.987	0.7988	High	25.64	25.87	12.169	48.676	0.8544	High	25.55	25.84	12.107	48.428	0.8363	High	580	584	KDLQF	21.74	2	3	21.13	21.52	0.24	8.01	0.8748	High		575	583	PDISLKDLQ	25.25	2	7	25.18	25.52	2.97	42.429	0.8797	High
ULK1c	413	421	CLSHANQLM	18.26	2	7	18.44	19.02	2.56	36.577	0.5808	High	18.48	19	2.644	37.776	0.866	High	18.36	18.79	2.593	37.048	0.8655	High	585	599	LQSFCPSEVQPFLRV	33.14	2	11	32.27	32.54	4.084	37.123	0.889	High		575	584	PDISLKDLQF	31.79	2	8	31.62	32.1	3.352	41.906	0.863	High
ULK1c	422	432	IMLQNHRKLLD	20.07	2	9	20.14	20.42	0.061	0.681	0.8745	High	20.12	20.47	0.084	0.933	0.912	High	19.99	20.38	0.082	0.909	0.9118	High	585	602	LQSFCPSEVQPFLRVPLL	38.06	2	13	36.85	37.38	5.237	40.288	0.8908	High		580	584	KDLQF	21.74	2	3	21.64	22.09	0.628	20.949	0.8543	High
ULK1c	422	432	IMLQNHRKLLD	20.07	3	9	20.31	20.42	0.09	0.996	0.8125	High	20.29	20.42	0.076	0.847	0.838	High	20.15	20.36	0.111	1.237	0.8849	High	588	602	FCPSEVQPFLRVPLL	36.91	2	10	36.1	36.47	4.454	44.539	0.8973	High		585	599	LQSFCPSEVQPFLRV	33.14	2	11	32.62	33.06	4.422	40.201	0.8181	High
ULK1c	422	448	IMLQNHRKLLDIKQKCTTAKQELANNL	25.25	3	25	25.3	25.67	1.293	5.171	0.9403	High	25.22	25.62	1.611	6.446	0.9541	High	25.18	25.6	1.518	6.071	0.9592	High	590	602	PSEVQPFLRVPLL	34.79	2	9	34.04	34.43	3.678	40.867	0.8956	High		585	602	LQSFCPSEVQPFLRVPLL	38.06	2	13	37.59	37.78	5.436	41.812	0.883	High
ULK1c	422	448	IMLQNHRKLLDIKQKCTTAKQELANNL	25.25	4	25	25.31	25.45	1.402	5.606	0.9255	High	25.21	25.61	1.641	6.566	0.9554	High	25.19	25.61	1.542	6.167	0.9572	High	603	615	CDFEPLHQHVLAL	30.35	2	10	29.81	29.94	4.295	42.949	0.912	High		588	602	FCPSEVQPFLRVPLL	36.91	2	10	36.57	36.95	4.576	45.764	0.8366	High
ULK1c	422	456	IMLQNHRKLLDIKQKCTTAKQELANNLHVRLKWCC	29.13	4	33	29.07	29.28	1.885	5.711	0.918	High	29.06	29.6	2.029	6.148	0.9141	High	28.91	29.55	1.911	5.791	0.9286	High	603	627	CDFEPLHQHVLALHNLVKAAQSLDE	35.84	3	22	34.79	35.26	10.172	46.238	0.8983	High		590	602	PSEVQPFLRVPLL	34.79	2	9	34.54	34.81	4.004	44.49	0.8631	High
ULK1c	422	456	IMLQNHRKLLDIKQKCTTAKQELANNLHVRLKWCC	29.13	6	33	29.11	29.56	1.776	5.381	0.8971	High	29.09	29.42	1.989	6.026	0.8993	High	29	29.57	1.861	5.638	0.9137	High	626	635	DEMSQTITDL	27.22	2	8	26.46	26.99	4.435	55.44	0.8112	High		603	615	CDFEPLHQHVLAL	30.35	2	10	30.28	30.51	3.57	35.695	0.8853	High
ULK1c	424	448	LQNHRKLLDIKQKCTTAKQELANNL	24.29	3	23	24.24	24.4	1.415	6.153	0.9062	High	24.22	24.72	1.608	6.991	0.9515	High	24.15	24.67	1.499	6.517	0.9514	High	636	656	LSEQKASVSQTSPQSASSPRM	18.2	2	17	17.29	17.7	11.343	66.722	0.9244	High		603	627	CDFEPLHQHVLALHNLVKAAQSLDE	35.84	3	22	35.24	35.56	9.304	42.289	0.9001	High
ULK1c	424	448	LQNHRKLLDIKQKCTTAKQELANNL	24.29	4	23	24.3	24.46	1.548	6.731	0.8558	High	24.29	24.62	1.657	7.206	0.9402	High	24.16	24.52	1.541	6.7	0.9586	High	636	656	LSEQKASVSQTSPQSASSPRM	18.2	3	17	17.25	17.65	11.335	66.678	0.9244	High		626	635	DEMSQTITDL	27.22	2	8	27.17	27.34	4.22	52.75	0.901	High
ULK1c	433	448	IKQKCTTAKQELANNL	19.82	2	14	20.01	20.11	1.333	9.518	0.821	High	19.97	20.36	1.603	11.449	0.8895	High	19.95	20.11	1.401	10.01	0.9192	High	686	701	PLEELSPDSIDAHTFD	28.27	2	13	27.55	27.96	6.102	46.935	0.9309	High		636	656	LSEQKASVSQTSPQSASSPRM	18.2	2	17	17.52	18.09	10.882	64.013	0.9065	High
ULK1c	433	448	IKQKCTTAKQELANNL	19.82	3	14	20.01	20.12	1.288	9.201	0.8377	High	19.94	20.37	1.554	11.099	0.8681	High	19.85	20.28	1.417	10.12	0.9186	High	702	716	FETIPHPNIEQTIHQ	25.49	2	11	25.03	25.24	7.115	64.682	0.8766	High		636	656	LSEQKASVSQTSPQSASSPRM	18.2	3	17	17.52	18.08	10.898	64.108	0.8961	High
ULK1c	449	456	HVRLKWCC	22.95	2	6	22.99	23.4	0.022	0.372	0.8144	High	22.96	23.39	0.061	1.024	0.8415	High	22.89	23.41	0.054	0.897	0.811	High	702	719	FETIPHPNIEQTIHQVSL	31.27	2	14	30.51	30.79	9.352	66.8	0.8979	High		686	701	PLEELSPDSIDAHTFD	28.27	2	13	27.93	28.52	5.513	42.408	0.8597	High
ULK1c	449	457	HVRLKWCCF	27.81	2	7	27.74	28.29	0.102	1.46	0.8974	High	27.72	28.34	0.142	2.024	0.8818	High	27.71	28.2	0.12	1.71	0.879	High	702	721	FETIPHPNIEQTIHQVSLDL	36.69	2	16	35.66	36.03	10.802	67.512	0.8999	High		702	716	FETIPHPNIEQTIHQ	25.49	2	11	25.33	25.69	6.762	61.473	0.88	High
ULK1c	457	469	FVMLHADQDGEKL	22.83	2	11	22.77	23.18	0.396	3.601	0.7291	High	22.69	23.21	0.524	4.762	0.8988	High	22.67	23.14	0.48	4.361	0.9246	High	702	721	FETIPHPNIEQTIHQVSLDL	36.69	3	16	35.67	36	10.849	67.807	0.9125	High		702	719	FETIPHPNIEQTIHQVSL	31.27	2	14	30.91	31.15	9.047	64.622	0.7231	High
ULK1c	457	472	FVMLHADQDGEKLQAL	24.62	2	14	24.94	25.21	0.468	3.345	0.8828	High	24.84	25.2	0.563	4.024	0.8574	High	24.77	25.16	0.539	3.848	0.8371	High	703	716	ETIPHPNIEQTIHQ	23.32	2	10	22.94	23.06	6.382	63.816	0.8172	High		702	721	FETIPHPNIEQTIHQVSLDL	36.69	2	16	36.23	36.26	10.363	64.768	0.9143	High
ULK1c	457	472	FVMLHADQDGEKLQAL	24.62	3	14	24.65	25.23	0.497	3.552	0.9258	High	24.66	25.26	0.467	3.339	0.9252	High	24.5	25.26	0.397	2.836	0.9344	High	703	719	ETIPHPNIEQTIHQVSL	29.83	2	13	29.14	29.41	8.872	68.249	0.8972	High		702	721	FETIPHPNIEQTIHQVSLDL	36.69	3	16	36.13	36.4	10.304	64.4	0.9046	High
ULK1c	458	472	VMLHADQDGEKLQAL	21.81	2	13	21.92	22.08	0.29	2.233	0.9283	High	21.77	22.19	0.368	2.831	0.9317	High	21.79	22.08	0.343	2.64	0.9407	High	703	721	ETIPHPNIEQTIHQVSLDL	35.74	2	15	34.68	35.01	10.092	67.278	0.9257	High		703	716	ETIPHPNIEQTIHQ	23.32	2	10	23.18	23.39	6.151	61.508	0.8074	High
ULK1c	458	472	VMLHADQDGEKLQAL	21.81	3	13	21.81	22.3	0.287	2.205	0.9158	High	21.77	22.32	0.434	3.341	0.904	High	21.69	22.29	0.335	2.58	0.8882	High	744	759	NLSSPNPISDPQSPEM	22.62	2	10	22.13	22.38	3.792	37.92	0.8869	High		703	719	ETIPHPNIEQTIHQVSL	29.83	2	13	29.5	29.82	8.544	65.722	0.8275	High
ULK1c	461	472	HADQDGEKLQAL	18.67	2	10	18.32	18.6	0.146	1.456	0.9394	High	18.31	18.6	0.239	2.39	0.9313	High	18.17	18.43	0.178	1.78	0.9199	High	765	771	YSSVINA	17.44	2	5	17.01	17.25	2.235	44.692	0.7918	High		703	721	ETIPHPNIEQTIHQVSLDL	35.74	2	15	35.1	35.38	9.729	64.863	0.8656	High
ULK1c	480	487	LERVKIVE	17.9	2	6	18.62	18.81	0.772	12.867	0.3802	High	18.07	18.59	0.762	12.698	0.9346	High	17.93	18.44	0.75	12.496	0.9282	High	772	794	IDSRRMQDTNVCGKEDFGDHTSL	24.51	3	21	24.05	24.36	8.804	41.924	0.8911	High		744	759	NLSSPNPISDPQSPEM	22.62	2	10	22.45	22.75	4.403	44.034	0.902	High
ULK1c	480	488	LERVKIVEA	18.28	2	7	18.76	18.96	0.889	12.704	0.4265	High	18.44	18.96	0.918	13.115	0.9084	High	18.32	18.81	0.851	12.159	0.921	High	799	810	ERCRVVAQDSHF	20.93	2	10	20.41	20.8	3.851	38.506	0.8746	High		765	771	YSSVINA	17.44	2	5	17.35	17.73	2.606	52.128	0.8146	High
ULK1c	480	489	LERVKIVEAL	22.8	2	8	23.16	23.61	1.019	12.736	0.63	High	22.83	23.36	0.987	12.337	0.9288	High	22.79	23.19	0.956	11.954	0.9422	High	842	855	VEIRNIIEKVKCSL	34.06	2	12	33.43	33.76	6.386	53.214	0.805	High		772	794	IDSRRMQDTNVCGKEDFGDHTSL	24.51	3	21	24.34	24.79	7.646	36.41	0.9125	High
ULK1c	480	495	LERVKIVEALSTVPQM	26.68	2	13	26.48	26.75	1.857	14.284	0.9167	High	26.54	26.99	2.106	16.203	0.9506	High	26.5	26.94	2.032	15.628	0.9508	High	856	870	EITLKEKHQKELLSL	26.94	3	13	26.46	26.62	5.114	39.338	0.7189	High		799	810	ERCRVVAQDSHF	20.93	2	10	20.77	21.04	2.261	22.606	0.8962	High
ULK1c	480	495	LERVKIVEALSTVPQM	26.68	3	13	26.57	26.72	2.001	15.396	0.8725	High	26.63	26.9	2.096	16.12	0.9417	High	26.53	26.94	2.018	15.523	0.9353	High	869	881	SLKNEYEGKLDGL	26.02	2	11	25.41	25.59	4.451	40.461	0.8145	High		832	841	DFSNSLKCTA	21.82	2	8	21.74	21.86	4.424	55.294	0.8153	High
ULK1c	487	494	EALSTVPQ	11.84	2	5	12.04	12.41	2.799	55.973	0.8817	High	12.9	13.34	2.796	55.929	0.8893	High	11.85	12.38	2.772	55.433	0.8615	High	882	901	IKETEENENKIKKLKGELVC	25.67	3	18	25.09	25.46	7.755	43.086	0.8557	High		842	855	VEIRNIIEKVKCSL	34.06	2	12	33.84	34	7.097	59.139	0.6198	High
ULK1c	499	520	AVVEVVRRKMFIKHYREWAGAL	26.97	3	20	26.84	27.11	0.367	1.836	0.8998	High	26.81	27.08	0.334	1.672	0.8548	High	26.83	27	0.328	1.64	0.8647	High	903	912	EEVLQNKDNE	13.35	2	8	12.38	12.9	4.134	51.677	0.8965	High		856	870	EITLKEKHQKELLSL	26.94	3	13	26.92	27	5.075	39.035	0.652	High
ULK1c	500	520	VVEVVRRKMFIKHYREWAGAL	26.4	3	19	26.26	26.42	0.568	2.991	0.8823	High	26.22	26.39	0.526	2.769	0.905	High	26.2	26.36	0.539	2.835	0.8723	High	913	923	FALVKHEKEAV	21.26	2	9	20.72	21.19	5.283	58.7	0.8323	High		869	881	SLKNEYEGKLDGL	26.02	2	11	25.74	25.89	3.986	36.241	0.8024	High
ULK1c	503	515	VVRRKMFIKHYRE	18.15	3	11	18.27	18.62	0.205	1.866	0.9196	High	18.25	18.55	0.247	2.244	0.9428	High	18.1	18.55	0.209	1.898	0.8994	High	913	925	FALVKHEKEAVIC	24.44	2	11	23.91	24.05	6.093	55.395	0.8094	High		882	901	IKETEENENKIKKLKGELVC	25.67	3	18	25.71	25.81	7.961	44.23	0.7206	High
ULK1c	503	515	VVRRKMFIKHYRE	18.15	4	11	18.21	18.66	0.176	1.603	0.8391	High	18.3	18.58	0.202	1.836	0.8274	High	18.12	18.64	0.201	1.828	0.8897	High	914	923	ALVKHEKEAV	15.66	2	8	14.66	15.15	4.554	56.922	0.8578	High		903	912	EEVLQNKDNE	13.35	2	8	13.04	13.24	4.066	50.825	0.9079	High
ULK1c	503	519	VVRRKMFIKHYREWAGA	22.24	3	15	22.13	22.38	0.093	0.619	0.874	High	22.27	22.32	0.094	0.629	0.8661	High	22.03	22.26	0.043	0.289	0.8668	High	924	934	ICLQNEKDQKL	20.97	3	9	20.47	20.82	5.959	66.211	0.8008	High		913	923	FALVKHEKEAV	21.26	2	9	21.01	21.44	4.965	55.161	0.8027	High
ULK1c	503	520	VVRRKMFIKHYREWAGAL	24.68	2	16	24.85	25.18	0.392	2.45	0.8864	High	24.8	25.18	0.391	2.443	0.8902	High	24.73	25.06	0.374	2.34	0.8752	High	924	936	ICLQNEKDQKLLE	23.39	2	11	22.86	23.15	6.153	55.933	0.931	High		913	925	FALVKHEKEAVIC	24.44	2	11	24.31	24.46	5.648	51.348	0.8032	High
ULK1c	503	520	VVRRKMFIKHYREWAGAL	24.68	3	16	24.8	25.19	0.357	2.228	0.9562	High	24.91	25.01	0.442	2.765	0.9409	High	24.81	25	0.433	2.708	0.9495	High	926	934	LQNEKDQKL	14.52	2	7	13.76	14.1	4.47	63.861	0.7895	High		914	923	ALVKHEKEAV	15.66	2	8	15.22	15.64	4.392	54.897	0.8852	High
ULK1c	520	540	LVKDGKRLYEAEKSKRESFGK	21.02	6	19	20.94	21.07	1.462	7.694	0.8027	High	20.86	21.27	1.526	8.03	0.9047	High	20.79	21.21	1.719	9.046	0.8574	High	937	947	MENIMHSQNCE	20.42	2	9	19.72	20.1	3.787	42.073	0.8379	High		924	934	ICLQNEKDQKL	20.97	3	9	20.88	21.11	5.865	65.17	0.9039	High
ULK1c	521	531	VKDGKRLYEAE	15.32	2	9	15.42	15.53	0.285	3.168	0.7071	High	15.57	15.81	0.343	3.81	0.8056	High	15.22	15.52	0.384	4.262	0.9154	High	947	956	EIKELKQSRE	14.92	2	8	14.41	14.77	3.546	44.325	0.8696	High		924	936	ICLQNEKDQKLLE	23.39	2	11	23.29	23.44	5.988	54.433	0.8323	High
ULK1c	521	541	VKDGKRLYEAEKSKRESFGKL	21.06	2	19	20.95	21.23	1.212	6.377	0.8584	High	20.8	21.23	1.56	8.21	0.8878	High	20.83	21.22	1.423	7.489	0.8994	High	948	956	IKELKQSRE	12.58	2	7	11.91	12.36	3.314	47.344	0.8792	High		926	934	LQNEKDQKL	14.52	2	7	14.6	14.75	4.35	62.139	0.7956	High
ULK1c	521	541	VKDGKRLYEAEKSKRESFGKL	21.06	3	19	20.88	21.05	1.676	8.819	0.884	High	20.88	21.31	1.779	9.364	0.899	High	20.84	21.19	1.685	8.867	0.9056	High	948	956	IKELKQSRE	12.58	3	7	12.02	12.22	3.347	47.812	0.8415	High		937	947	MENIMHSQNCE	20.42	2	9	20.16	20.38	3.731	41.459	0.8581	High
ULK1c	521	541	VKDGKRLYEAEKSKRESFGKL	21.06	4	19	20.78	21	1.53	8.054	0.9043	High	20.72	21.42	1.723	9.066	0.9291	High	20.76	21.33	1.608	8.465	0.9312	High	957	970	IVLEDLKKLHVEND	26.98	2	12	26.48	26.8	4.772	39.77	0.8568	High		938	947	ENIMHSQNCE	16.64	2	8	16.82	16.93	3.449	43.111	0.7064	High
ULK1c	521	541	VKDGKRLYEAEKSKRESFGKL	21.06	5	19	20.86	20.96	1.393	7.329	0.8524	High	20.93	21.23	1.558	8.198	0.9424	High	20.79	21.27	1.565	8.235	0.9424	High	957	970	IVLEDLKKLHVEND	26.98	3	12	26.47	26.78	5.155	42.961	0.8996	High		947	956	EIKELKQSRE	14.92	2	8	14.99	15.05	3.933	49.168	0.8282	High
ULK1c	521	541	VKDGKRLYEAEKSKRESFGKL	21.06	6	19	20.95	21.1	1.554	8.179	0.8219	High	20.59	21.54	1.559	8.203	0.896	High	20.6	21.54	1.746	9.189	0.8459	High	957	975	IVLEDLKKLHVENDEKLQL	30.55	2	17	29.98	30.42	7.034	41.374	0.9272	High		948	956	IKELKQSRE	12.58	2	7	12.41	12.58	3.61	51.572	0.8504	High
ULK1c	528	541	YEAEKSKRESFGKL	19.37	3	12	19.42	19.52	1.17	9.752	0.6359	High	19.5	19.79	1.363	11.362	0.9083	High	19.39	19.69	1.125	9.373	0.8926	High	957	975	IVLEDLKKLHVENDEKLQL	30.55	3	17	30.02	30.36	6.806	40.033	0.8979	High		948	956	IKELKQSRE	12.58	3	7	12.51	12.77	3.736	53.374	0.8914	High
ULK1c	542	551	FRKSFLRNRL	21.83	4	8	21.87	22.28	4.844	60.554	0.8084	High	21.85	22.27	4.908	61.348	0.8656	High	21.75	22.27	4.859	60.739	0.8702	High	957	975	IVLEDLKKLHVENDEKLQL	30.55	4	17	30.02	30.33	6.948	40.869	0.9075	High		957	970	IVLEDLKKLHVEND	26.98	2	12	26.81	27.19	4.918	40.981	0.8911	High
ULK1c	552	562	FRGLDSWPPSF	28.07	2	7	27.56	27.85	3.954	56.492	0.8491	High	27.63	28.1	3.883	55.478	0.9043	High	27.59	28.01	3.885	55.505	0.917	High	960	975	EDLKKLHVENDEKLQL	25.78	2	14	25.38	25.63	5.591	39.937	0.8792	High		957	970	IVLEDLKKLHVEND	26.98	3	12	26.85	27.06	5.006	41.715	0.8434	High
ULK1c	563	574	CTQKPRKFDCEL	21.5	3	9	21.27	21.92	5.333	59.26	0.8762	High	21.25	21.99	5.361	59.563	0.9159	High	21.19	21.83	5.306	58.955	0.9177	High	960	975	EDLKKLHVENDEKLQL	25.78	3	14	25.34	25.62	5.398	38.555	0.8943	High		957	975	IVLEDLKKLHVENDEKLQL	30.55	2	17	30.39	30.66	6.615	38.914	0.9045	High
ULK1c	563	579	CTQKPRKFDCELPDISL	27.27	2	13	27.2	27.39	6.977	53.672	0.7898	High	27.12	27.35	6.854	52.723	0.6749	High	27.03	27.23	6.803	52.333	0.6997	High	976	980	LRAEL	18.86	2	3	18.43	19.03	0.372	12.385	0.8992	High		957	975	IVLEDLKKLHVENDEKLQL	30.55	3	17	30.49	30.72	6.591	38.772	0.8811	High
ULK1c	575	583	PDISLKDLQ	22.48	2	7	22.48	22.61	2.254	32.194	0.9036	High	22.46	22.91	2.352	33.598	0.9015	High	22.38	22.81	2.325	33.212	0.9078	High	981	988	QSLEQSHL	18.81	2	6	18.21	18.84	3.677	61.282	0.7097	High		957	975	IVLEDLKKLHVENDEKLQL	30.55	4	17	30.48	30.65	6.562	38.599	0.8144	High
ULK1c	575	584	PDISLKDLQF	28.33	2	8	27.7	27.9	2.616	32.694	0.8821	High	27.77	28.17	2.657	33.218	0.8904	High	27.67	28.19	2.628	32.853	0.9143	High	981	990	QSLEQSHLKE	16.49	2	8	16.13	16.5	4.217	52.711	0.8998	High		960	975	EDLKKLHVENDEKLQL	25.78	2	14	25.74	25.83	5.576	39.831	0.8383	High
ULK1c	584	602	FLQSFCPSEVQPFLRVPLL	34.21	2	14	33.72	34.01	4.114	29.383	0.9174	High	33.65	34.31	4.329	30.919	0.9397	High	33.71	34.13	4.277	30.547	0.922	High	989	995	KELEDTL	20.49	2	5	19.71	20.16	2.148	42.957	0.8898	High		960	975	EDLKKLHVENDEKLQL	25.78	3	14	25.58	25.97	5.579	39.851	0.8721	High
ULK1c	585	599	LQSFCPSEVQPFLRV	28.68	2	11	28.63	28.76	2.248	20.441	0.7323	High	28.67	29.03	2.395	21.773	0.9023	High	28.66	28.96	2.37	21.546	0.8769	High	996	1002	QVRHIQE	12.46	2	5	11.58	12.11	3.149	62.989	0.8855	High		976	980	LRAEL	18.86	2	3	19.04	19.22	0.456	15.194	0.8981	High
ULK1c	585	602	LQSFCPSEVQPFLRVPLL	33.15	2	13	32.59	32.65	4.318	33.217	0.8533	High	32.35	32.99	4.526	34.817	0.917	High	32.29	32.97	4.421	34.01	0.921	High	996	1003	QVRHIQEF	21.11	2	6	20.3	20.78	3.303	55.043	0.8495	High		981	988	QSLEQSHL	18.81	2	6	18.79	19.24	3.324	55.393	0.8618	High
ULK1c	585	602	LQSFCPSEVQPFLRVPLL	33.15	3	13	32.39	32.53	3.655	28.116	0.7589	High	32.4	32.93	3.557	27.362	0.8631	High	32.38	32.78	3.561	27.394	0.8651	High	1003	1014	FEKVMTDHRVSL	23.93	3	10	23.46	24	3.97	39.702	0.9163	High		981	990	QSLEQSHLKE	16.49	2	8	16.55	16.93	4.168	52.095	0.9025	High
ULK1c	585	603	LQSFCPSEVQPFLRVPLLC	33.11	2	14	32.95	33.11	4.733	33.809	0.8582	High	32.88	33.55	4.863	34.737	0.8757	High	32.98	33.48	4.86	34.717	0.8798	High	1003	1016	FEKVMTDHRVSLEE	23	2	12	22.54	22.95	4.164	34.702	0.8874	High		989	995	KELEDTL	20.49	2	5	20.2	20.53	2.256	45.128	0.8724	High
ULK1c	585	604	LQSFCPSEVQPFLRVPLLCD	32.64	2	15	32.69	32.77	5.215	34.768	0.864	High	32.67	32.92	5.322	35.478	0.9182	High	32.63	32.92	5.241	34.939	0.8583	High	1003	1016	FEKVMTDHRVSLEE	23	3	12	22.79	22.92	4.185	34.872	0.8686	High		996	1002	QVRHIQE	12.46	2	5	12.19	12.46	2.967	59.336	0.8849	High
ULK1c	588	602	FCPSEVQPFLRVPLL	31.73	2	10	31.94	32.01	3.881	38.813	0.8546	High	31.75	32.21	3.932	39.322	0.8902	High	31.79	32.08	3.905	39.047	0.8913	High	1004	1014	EKVMTDHRVSL	21.36	2	9	20.89	21.24	3.57	39.671	0.9201	High		996	1003	QVRHIQEF	21.11	2	6	20.82	21.29	3.136	52.268	0.8709	High
ULK1c	590	602	PSEVQPFLRVPLL	30.04	2	9	30.51	30.58	2.985	33.169	0.8345	High	30.04	30.62	3.15	35.003	0.8908	High	29.99	30.62	3.098	34.425	0.9101	High	1015	1027	EELKKENQQIINQ	16.93	2	11	16.52	16.95	2.28	20.728	0.9365	High		1003	1014	FEKVMTDHRVSL	23.93	2	10	23.83	23.9	4.05	40.504	0.8072	High
ULK1c	603	615	CDFEPLHQHVLAL	26.87	2	10	26.5	26.8	4.065	40.648	0.8625	High	26.47	27.12	3.966	39.658	0.864	High	26.42	27.02	4.032	40.319	0.8023	High	1028	1045	IQESHAEIIQEKEKQLQE	22.09	2	16	21.62	22	3.622	22.635	0.913	High		1003	1014	FEKVMTDHRVSL	23.93	3	10	23.82	23.95	4.005	40.046	0.7966	High
ULK1c	603	627	CDFEPLHQHVLALHNLVKAAQSLDE	30.74	3	22	30.4	30.86	8.525	38.749	0.8298	High	30.37	30.85	8.724	39.655	0.8583	High	30.34	30.84	8.476	38.525	0.8539	High	1028	1045	IQESHAEIIQEKEKQLQE	22.09	3	16	21.57	22.09	3.804	23.777	0.928	High		1003	1016	FEKVMTDHRVSLEE	23	2	12	22.86	23.25	4.123	34.354	0.8845	High
ULK1c	604	615	DFEPLHQHVLAL	26.62	2	9	26.09	26.31	3.428	38.093	0.873	High	26.05	26.59	3.525	39.169	0.8608	High	26.02	26.49	3.437	38.192	0.8478	High	1034	1045	EIIQEKEKQLQE	20.57	2	10	19.67	20.23	2.192	21.917	0.9404	High		1003	1016	FEKVMTDHRVSLEE	23	3	12	22.87	23.02	4.163	34.695	0.785	High
ULK1c	605	627	FEPLHQHVLALHNLVKAAQSLDE	29.27	3	20	29.07	29.55	7.241	36.205	0.7887	High	29.1	29.71	7.506	37.53	0.8268	High	29.01	29.59	7.352	36.76	0.8286	High	1046	1053	LKLKVSDL	25.1	2	6	24.59	24.89	1.403	23.388	0.865	High		1004	1014	EKVMTDHRVSL	21.36	2	9	21.23	21.62	3.597	39.962	0.9084	High
ULK1c	616	625	HNLVKAAQSL	19.7	2	8	19.68	20.06	5.734	71.672	0.7622	High	19.64	20.05	5.828	72.848	0.7876	High	19.57	20	5.709	71.366	0.7697	High	1049	1060	KVSDLSDTRCKL	22.26	2	10	21.59	21.79	3.989	39.888	0.8806	High		1015	1027	EELKKENQQIINQ	16.93	2	11	16.88	17.5	2.327	21.152	0.9362	High
ULK1c	626	635	DEMSQTITDL	24.37	2	8	23.73	24.12	5.647	70.581	0.0068	High	23.94	24.24	5.672	70.899	0.8211	High	23.96	24.14	5.538	69.225	0.8082	High	1049	1060	KVSDLSDTRCKL	22.26	3	10	21.63	21.85	4.133	41.327	0.8322	High		1028	1045	IQESHAEIIQEKEKQLQE	22.09	2	16	21.93	22.31	3.656	22.849	0.8908	High
ULK1c	636	656	LSEQKASVSQTSPQSASSPRM	16.2	2	17	16.24	16.75	12.314	72.435	0.8933	High	16.31	16.73	12.311	72.42	0.8874	High	16.03	16.6	12.193	71.725	0.898	High	1054	1060	SDTRCKL	15.78	2	5	15.34	15.69	2.352	47.036	0.808	High		1028	1045	IQESHAEIIQEKEKQLQE	22.09	3	16	22.01	22.35	3.691	23.067	0.9207	High
ULK1c	636	656	LSEQKASVSQTSPQSASSPRM	16.2	3	17	16.4	16.63	12.12	71.295	0.7979	High	16.45	16.63	12.238	71.991	0.7839	High	16.21	16.46	12.119	71.286	0.8363	High	1064	1073	LALKEAETDE	17.91	2	8	17.57	18.12	2.081	26.015	0.9085	High		1034	1045	EIIQEKEKQLQE	20.57	2	10	20.07	20.44	2.216	22.155	0.8978	High
ULK1c	657	681	ESTAGITTTTSPRTPPPLTVQDPLC	23.91	2	18	23.82	23.97	12.621	70.119	0.7304	High	23.73	24.04	12.669	70.383	0.8336	High	23.7	23.95	12.788	71.046	0.8622	High	1074	1080	IKILLEE	25.8	2	5	25.53	25.93	0.954	19.077	0.8696	High		1046	1053	LKLKVSDL	25.1	2	6	24.99	25.24	1.284	21.4	0.8158	High
ULK1c	657	685	ESTAGITTTTSPRTPPPLTVQDPLCPAVC	25.53	3	21	25.55	25.84	13.374	63.685	0.892	High	25.39	26.01	13.388	63.753	0.9228	High	25.4	25.89	13.355	63.596	0.9096	High	1078	1093	LEESRAQQKETLKSLL	27.08	3	14	26.37	26.71	9.998	71.418	0.8509	High		1049	1060	KVSDLSDTRCKL	22.26	2	10	22.03	22.53	3.791	37.908	0.9075	High
ULK1c	686	701	PLEELSPDSIDAHTFD	24.85	2	13	24.83	25.12	7.03	54.079	0.8867	High	24.85	25.09	7.015	53.963	0.9081	High	24.76	25.06	7.002	53.865	0.8938	High	1101	1107	RTEISKL	18.84	2	5	18.31	19.01	1.091	21.815	0.8925	High		1049	1060	KVSDLSDTRCKL	22.26	3	10	22.27	22.5	3.818	38.178	0.9052	High
ULK1c	702	716	FETIPHPNIEQTIHQ	22.51	2	11	22.52	22.86	7.778	70.707	0.9082	High	22.49	22.85	7.566	68.779	0.8987	High	22.44	22.74	7.673	69.756	0.9022	High	1101	1116	RTEISKLNQKIQDNNE	21.38	3	14	20.72	21.17	3.351	23.938	0.7872	High		1054	1060	SDTRCKL	15.78	2	5	15.96	16.32	2.306	46.124	0.8013	High
ULK1c	702	716	FETIPHPNIEQTIHQ	22.51	3	11	22.49	22.95	7.395	67.228	0.6161	High	22.54	22.74	7.71	70.092	0.8771	High	22.44	22.76	7.508	68.255	0.8848	High	1140	1148	LISRHEEES	11.71	2	7	11.29	11.58	1.667	23.809	0.7734	High		1064	1073	LALKEAETDE	17.91	2	8	17.92	18.42	2.137	26.716	0.853	High
ULK1c	702	718	FETIPHPNIEQTIHQVS	24.63	2	13	24.59	24.85	8.977	69.053	0.7367	High	24.58	24.77	8.98	69.076	0.7947	High	24.56	24.73	9.079	69.836	0.7757	High	1140	1151	LISRHEEESNIL	23.15	2	10	22.24	22.66	2.224	22.245	0.9332	High		1074	1080	IKILLEE	25.8	2	5	25.64	25.92	0.836	16.72	0.8102	High
ULK1c	702	718	FETIPHPNIEQTIHQVS	24.63	3	13	24.73	24.89	9.564	73.571	0.6478	High	24.5	24.79	9.523	73.256	0.8313	High	24.48	24.75	9.633	74.103	0.8255	High	1152	1167	KAELNKVTSLHNQAFE	23.05	2	14	22.43	22.6	6.886	49.188	0.8889	High		1078	1093	LEESRAQQKETLKSLL	27.08	3	14	26.83	27.17	9.817	70.122	0.8208	High
ULK1c	702	719	FETIPHPNIEQTIHQVSL	27.32	2	14	27.12	27.31	9.87	70.502	0.6884	High	27.03	27.32	9.815	70.107	0.8166	High	26.98	27.23	9.796	69.97	0.8133	High	1156	1166	NKVTSLHNQAF	20.62	2	9	20.28	20.68	5.527	61.412	0.9043	High		1101	1107	RTEISKL	18.84	2	5	18.86	19.5	1.131	22.616	0.8594	High
ULK1c	702	719	FETIPHPNIEQTIHQVSL	27.32	3	14	27.1	27.33	10.216	72.968	0.789	High	27.02	27.29	10.516	75.114	0.8024	High	27	27.34	10.323	73.735	0.6544	High	1156	1167	NKVTSLHNQAFE	20.09	2	10	19.67	20.16	6.114	61.136	0.9007	High		1101	1116	RTEISKLNQKIQDNNE	21.38	3	14	21.21	21.48	3.241	23.152	0.8124	High
ULK1c	702	721	FETIPHPNIEQTIHQVSLDL	31.39	2	16	31.3	31.83	11.44	71.501	0.8834	High	31.23	31.83	11.185	69.908	0.8897	High	31.33	31.77	11.089	69.308	0.8947	High	1166	1179	FEIEKNLKEQIIEL	31.61	2	12	31.39	31.69	2.447	20.388	0.924	High		1140	1148	LISRHEEES	11.71	2	7	11.76	11.99	1.533	21.9	0.8321	High
ULK1c	702	721	FETIPHPNIEQTIHQVSLDL	31.39	3	16	31.28	31.81	11.556	72.228	0.902	High	31.24	31.75	11.235	70.22	0.8882	High	31.22	31.6	11.312	70.702	0.8779	High	1191	1205	ERQKDEKITQQEEKY	17.4	3	13	16.94	17.27	7.375	56.733	0.8228	High		1140	1151	LISRHEEESNIL	23.15	2	10	22.71	23	2.235	22.351	0.9005	High
ULK1c	703	719	ETIPHPNIEQTIHQVSL	26.18	2	13	26.08	26.27	9.339	71.835	0.7976	High	25.89	26.21	9.296	71.507	0.8567	High	25.88	26.15	9.268	71.295	0.8677	High	1191	1212	ERQKDEKITQQEEKYEAIIQNL	31.19	3	20	30.6	30.94	9.068	45.34	0.8892	High		1152	1167	KAELNKVTSLHNQAFE	23.05	2	14	22.63	23.06	6.947	49.623	0.8278	High
ULK1c	703	721	ETIPHPNIEQTIHQVSLDL	30.7	2	15	30.61	30.9	10.649	70.992	0.907	High	30.45	30.82	10.621	70.806	0.878	High	30.47	30.91	10.513	70.088	0.902	High	1213	1230	EKDRQKLVSSQEQDREQL	19.93	2	16	19.36	19.58	8.996	56.227	0.8172	High		1156	1166	NKVTSLHNQAF	20.62	2	9	20.69	21.14	5.318	59.092	0.9019	High
ULK1c	703	721	ETIPHPNIEQTIHQVSLDL	30.7	3	15	30.53	30.85	10.854	72.363	0.9202	High	30.41	30.86	10.698	71.322	0.8615	High	30.48	30.78	10.663	71.084	0.914	High	1231	1236	IQKLNC	15.77	2	4	15.36	15.81	2.062	51.555	0.8157	High		1156	1167	NKVTSLHNQAFE	20.09	2	10	20.01	20.61	6.005	60.048	0.9134	High
ULK1c	744	759	NLSSPNPISDPQSPEM	20.48	2	10	20.46	20.74	6.447	64.471	0.854	High	20.44	20.7	6.36	63.605	0.8795	High	20.37	20.6	6.401	64.014	0.876	High	1237	1248	EKDEAIQTALKE	20.94	2	10	20.52	20.74	3.534	35.337	0.8776	High		1166	1179	FEIEKNLKEQIIEL	31.61	2	12	31.43	31.81	2.425	20.208	0.9194	High
ULK1c	765	794	YSSVINAIDSRRMQDTNVCGKEDFGDHTSL	26.02	3	28	25.88	26.13	14.507	51.809	0.6401	High	25.77	26.1	14.478	51.708	0.8026	High	25.85	26	14.139	50.495	0.8917	High	1249	1254	FKLERE	19.29	2	4	18.34	18.74	2.869	71.729	0.842	High		1191	1205	ERQKDEKITQQEEKY	17.4	3	13	17.39	17.59	7.398	56.907	0.8036	High
ULK1c	772	794	IDSRRMQDTNVCGKEDFGDHTSL	21.56	3	21	21.72	21.94	9.953	47.394	0.8927	High	21.61	22.01	10.161	48.387	0.8926	High	21.53	22.01	9.755	46.452	0.8834	High	1255	1261	VVEKELL	21.67	2	5	21.01	21.4	1.606	32.112	0.8562	High		1191	1212	ERQKDEKITQQEEKYEAIIQNL	31.19	3	20	31.1	31.17	8.965	44.827	0.8901	High
ULK1c	772	794	IDSRRMQDTNVCGKEDFGDHTSL	21.56	4	21	21.61	21.97	10.209	48.613	0.8368	High	21.53	21.97	10.1	48.097	0.9166	High	21.53	21.98	9.91	47.191	0.896	High	1262	1287	EKVKHLENQIAKSPAIDSTRGDSSSL	22.75	3	23	22.44	22.83	11.11	48.304	0.924	High		1213	1230	EKDRQKLVSSQEQDREQL	19.93	2	16	19.7	19.98	9.16	57.251	0.8733	High
ULK1c	799	810	ERCRVVAQDSHF	18.55	2	10	18.65	19	4.159	41.588	0.3533	High	18.66	18.97	4.124	41.236	0.8501	High	18.47	18.79	4.095	40.947	0.8258	High	1271	1287	IAKSPAIDSTRGDSSSL	19.25	2	14	18.79	19.29	7.849	56.064	0.9138	High		1231	1236	IQKLNC	15.77	2	4	15.78	15.87	2.202	55.049	0.8041	High
ULK1c	811	817	SIQTIKE	14.24	2	5	14.45	14.72	3.975	79.502	0.8324	High	14.74	14.99	3.874	77.479	0.6889	High	14.17	14.45	3.843	76.868	0.7303	High	1288	1302	VAELQEKLQEEKAKF	27.18	3	13	26.38	26.68	10.214	78.566	0.9116	High		1237	1248	EKDEAIQTALKE	20.94	2	10	20.87	21.06	3.37	33.703	0.8209	High
ULK1c	811	822	SIQTIKEDLCHF	28.88	2	10	28.66	28.94	7.236	72.362	0.4875	High	28.56	28.72	7.169	71.686	0.7999	High	28.4	28.66	7.059	70.585	0.7229	High	1291	1302	LQEKLQEEKAKF	21.81	3	10	21.23	21.49	6.837	68.374	0.8649	High		1249	1254	FKLERE	19.29	2	4	18.82	19.34	2.75	68.742	0.8966	High
ULK1c	823	832	RTFVQKEQCD	15.01	2	8	15.01	15.24	5.806	72.576	0.6955	High	15.18	15.34	5.665	70.808	0.7687	High	14.76	15.15	5.812	72.655	0.8089	High	1292	1302	QEKLQEEKAKF	20.04	2	9	19.51	19.81	5.7	63.333	0.9103	High		1255	1261	VVEKELL	21.67	2	5	21.55	21.82	1.702	34.037	0.8715	High
ULK1c	842	849	VEIRNIIE	21.53	2	6	21.52	21.57	1.508	25.13	0.7956	High	21.51	21.83	1.604	26.739	0.8182	High	21.4	21.81	1.533	25.545	0.8606	High	1303	1324	LEQLEEQEKRKNEEMQNVRTSL	25.19	3	20	24.36	24.68	14.808	74.04	0.8976	High		1262	1287	EKVKHLENQIAKSPAIDSTRGDSSSL	22.75	3	23	22.83	23.06	10.796	46.94	0.925	High
ULK1c	842	855	VEIRNIIEKVKCSL	29.45	2	12	29.34	29.61	2.88	23.998	0.7592	High	29.32	29.65	3.138	26.147	0.812	High	29.23	29.65	2.995	24.957	0.7769	High	1306	1324	LEEQEKRKNEEMQNVRTSL	22.63	3	17	21.72	22.01	10.726	63.095	0.8792	High		1271	1287	IAKSPAIDSTRGDSSSL	19.25	2	14	19.27	19.57	7.347	52.48	0.9153	High
ULK1c	842	855	VEIRNIIEKVKCSL	29.45	3	12	29.23	29.63	3.12	26.003	0.6413	High	29.25	29.78	3.117	25.972	0.8662	High	29.19	29.78	2.992	24.93	0.8743	High	1307	1324	EEQEKRKNEEMQNVRTSL	21.6	3	16	21.02	21.37	9.608	60.047	0.9095	High		1288	1302	VAELQEKLQEEKAKF	27.18	2	13	26.82	27.06	9.834	75.644	0.7246	High
ULK1c	842	856	VEIRNIIEKVKCSLE	29.48	2	13	29.34	29.51	3.278	25.215	0.6723	High	29.32	29.65	3.342	25.708	0.7918	High	29.33	29.54	3.09	23.771	0.8518	High	1319	1324	NVRTSL	16.92	2	4	15.88	16.37	3.196	79.9	0.8761	High		1288	1302	VAELQEKLQEEKAKF	27.18	3	13	26.8	27.03	10.042	77.244	0.9015	High
ULK1c	842	856	VEIRNIIEKVKCSLE	29.48	3	13							29.34	29.58	3.44	26.462	0.859	High	29.22	29.59	3.255	25.041	0.8331	High	1325	1332	IAEQQTNF	17.58	2	6	16.71	17.09	2.447	40.784	0.8851	High		1291	1302	LQEKLQEEKAKF	21.81	3	10	21.62	21.84	6.687	66.87	0.8831	High
ULK1c	856	870	EITLKEKHQKELLSL	23.56	3	13	23.61	23.8	2.549	19.607	0.6679	High	23.42	23.98	2.654	20.417	0.8431	High	23.46	23.88	2.635	20.272	0.8902	High	1337	1349	TREKMRKENIIND	18.32	2	11	17.99	18.36	6.152	55.923	0.9253	High		1292	1302	QEKLQEEKAKF	20.04	2	9	19.99	20.27	5.936	65.959	0.9042	High
ULK1c	856	881	EITLKEKHQKELLSLKNEYEGKLDGL	26.03	3	24	25.78	26.25	4.249	17.703	0.7505	High	25.72	26.17	4.722	19.675	0.8946	High	25.72	26.17	4.618	19.241	0.9176	High	1350	1366	LSDKLKSTMQQQERDKD	20.06	2	15	19.62	19.9	9.346	62.307	0.8133	High		1303	1324	LEQLEEQEKRKNEEMQNVRTSL	25.19	3	20	24.97	25.08	14.077	70.386	0.6868	High
ULK1c	856	881	EITLKEKHQKELLSLKNEYEGKLDGL	26.03	4	24	25.88	26.1	4.588	19.117	0.7002	High	25.79	26.16	5.053	21.055	0.8717	High	25.7	26.12	4.994	20.809	0.8793	High	1350	1366	LSDKLKSTMQQQERDKD	20.06	3	15	19.58	19.85	9.368	62.454	0.883	High		1306	1324	LEEQEKRKNEEMQNVRTSL	22.63	3	17	22.2	22.37	10.407	61.219	0.8276	High
ULK1c	857	881	ITLKEKHQKELLSLKNEYEGKLDGL	25.86	3	23	25.82	26.01	4.329	18.823	0.7172	High	25.74	26.06	4.29	18.651	0.888	High	25.69	25.98	4.168	18.122	0.9303	High	1350	1369	LSDKLKSTMQQQERDKDLIE	24.49	2	18	23.81	24.35	9.894	54.968	0.8978	High		1307	1324	EEQEKRKNEEMQNVRTSL	21.6	3	16	21.51	21.72	9.486	59.29	0.8353	High
ULK1c	857	881	ITLKEKHQKELLSLKNEYEGKLDGL	25.86	4	23	25.79	26.1	4.356	18.938	0.6836	High	25.76	26.02	4.593	19.97	0.8929	High	25.76	25.93	4.434	19.28	0.906	High	1350	1369	LSDKLKSTMQQQERDKDLIE	24.49	3	18	24.06	24.28	9.825	54.582	0.804	High		1319	1324	NVRTSL	16.92	2	4	16.37	16.88	3.067	76.677	0.8733	High
ULK1c	869	881	SLKNEYEGKLDGL	22.88	2	11	22.99	23.05	1.699	15.445	0.7852	High	22.76	23.25	1.937	17.612	0.7648	High	22.83	22.99	1.857	16.883	0.8787	High	1353	1369	KLKSTMQQQERDKDLIE	21.35	3	15	20.8	21.09	7.697	51.312	0.7733	High		1325	1332	IAEQQTNF	17.58	2	6	17.2	17.5	3.105	51.753	0.8356	High
ULK1c	882	899	IKETEENENKIKKLKGEL	21.36	2	16	21.48	21.59	1.184	7.4	0.6423	High	21.17	21.57	1.731	10.819	0.7223	High	21.17	21.42	1.522	9.515	0.8052	High	1359	1369	QQQERDKDLIE	17.61	2	9	17.03	17.33	3.785	42.056	0.8846	High		1337	1349	TREKMRKENIIND	18.32	2	11	18.72	18.84	6.092	55.381	0.9046	High
ULK1c	882	899	IKETEENENKIKKLKGEL	21.36	4	16	21.26	21.39	1.384	8.651	0.7927	High	21.26	21.62	1.682	10.514	0.7867	High	21.09	21.56	1.523	9.521	0.8146	High	1370	1378	SLSEDRARL	20.1	3	7	19.7	19.88	1.322	18.887	0.8404	High		1350	1366	LSDKLKSTMQQQERDKD	20.06	2	15	19.96	20.19	9.434	62.896	0.8064	High
ULK1c	882	901	IKETEENENKIKKLKGELVC	22.46	3	18	22.51	22.64	1.483	8.238	0.9037	High	22.46	22.87	1.787	9.93	0.9296	High	22.41	22.8	1.724	9.576	0.8957	High	1370	1392	SLSEDRARLLEEKKKLEEEVSKL	33.53	3	21	33.13	33.52	4.486	21.361	0.9455	High		1350	1366	LSDKLKSTMQQQERDKD	20.06	3	15	19.92	20.31	9.236	61.575	0.864	High
ULK1c	903	912	EEVLQNKDNE	12.93	2	8	12.82	13.15	2.683	33.534	0.6607	High	13.47	13.86	2.803	35.035	0.9086	High	12.49	12.9	2.755	34.437	0.8795	High	1372	1392	SEDRARLLEEKKKLEEEVSKL	31.1	3	19	30.47	30.78	3.945	20.763	0.7757	High		1350	1369	LSDKLKSTMQQQERDKDLIE	24.49	2	18	24.34	24.55	9.952	55.288	0.8095	High
ULK1c	913	923	FALVKHEKEAV	18.87	2	9	18.91	19.27	3.735	41.505	0.8506	High	18.88	19.22	4.008	44.529	0.9054	High	18.76	19.15	3.883	43.143	0.8912	High	1379	1390	LEEKKKLEEEVS	19.12	2	10	18.65	18.91	1.541	15.405	0.8301	High		1350	1369	LSDKLKSTMQQQERDKDLIE	24.49	3	18	24.44	24.53	9.88	54.886	0.9009	High
ULK1c	914	923	ALVKHEKEAV	14.06	2	8	14.3	14.69	3.286	41.078	0.807	High	14.5	14.95	3.549	44.361	0.9029	High	14.04	14.48	3.425	42.815	0.8989	High	1379	1392	LEEKKKLEEEVSKL	26.39	2	12	25.94	26.37	3.088	25.73	0.9492	High		1353	1369	KLKSTMQQQERDKDLIE	21.35	3	15	21.24	21.35	8.48	56.53	0.6793	High
ULK1c	924	934	ICLQNEKDQKL	18.7	2	9	18.91	19.22	5.005	55.615	0.7908	High	18.91	19.07	5.014	55.711	0.8768	High	18.78	19.01	4.888	54.315	0.8741	High	1379	1392	LEEKKKLEEEVSKL	26.39	3	12	25.97	26.38	3.086	25.715	0.9327	High		1359	1369	QQQERDKDLIE	17.61	2	9	17.8	17.88	3.725	41.386	0.7684	High
ULK1c	924	934	ICLQNEKDQKL	18.7	3	9	19.02	19.14	5.233	58.146	0.8204	High	18.69	19.31	5.089	56.545	0.8609	High	18.8	19.04	5.107	56.742	0.8892	High	1393	1409	RSSSFVPSPYVATAPEL	27.78	2	12	26.83	27.3	7.388	61.564	0.9253	High		1370	1378	SLSEDRARL	20.1	3	7	20.12	20.19	1.868	26.683	0.8091	High
ULK1c	924	936	ICLQNEKDQKLLE	20.74	2	11	20.82	21.15	5.037	45.792	0.5437	High	20.9	21.1	5.036	45.778	0.8635	High	20.71	21.07	4.861	44.193	0.8375	High	1397	1409	FVPSPYVATAPEL	26.75	2	8	26.21	26.53	3.755	46.932	0.8414	High		1370	1392	SLSEDRARLLEEKKKLEEEVSKL	33.53	3	21	33.42	33.55	5.302	25.249	0.7768	High
ULK1c	924	936	ICLQNEKDQKLLE	20.74	3	11	20.78	21.2	4.979	45.264	0.9277	High	20.76	21.14	4.987	45.336	0.8675	High	20.73	21.01	4.979	45.263	0.8908	High	1410	1427	YGACAPELPGESDRSAVE	22.57	2	14	22.24	22.6	7.177	51.262	0.934	High		1372	1392	SEDRARLLEEKKKLEEEVSKL	31.1	3	19	30.88	31.07	4.345	22.87	0.7308	High
ULK1c	935	947	LEMENIMHSQNCE	22.86	2	11	22.8	23.08	0.928	8.437	0.8336	High	22.78	23.02	1.352	12.288	0.9072	High	22.69	23.06	1.141	10.377	0.8884	High	1410	1438	YGACAPELPGESDRSAVETADEGRVDSAM	26.44	3	25	25.77	26.21	13.796	55.183	0.8834	High		1379	1390	LEEKKKLEEEVS	19.12	2	10	18.96	19.21	1.786	17.857	0.844	High
ULK1c	937	947	MENIMHSQNCE	18.41	2	9	18.63	18.88	0.81	8.996	0.8302	High	18.44	18.94	1.121	12.461	0.8883	High	18.28	18.83	1.007	11.189	0.8712	High	1415	1427	PELPGESDRSAVE	19.14	2	10	18.67	19.14	5.348	53.477	0.8743	High		1379	1392	LEEKKKLEEEVSKL	26.39	2	12	26.32	26.58	3.482	29.013	0.9226	High
ULK1c	938	947	ENIMHSQNCE	15.51	2	8	15.59	15.86	0.587	7.337	0.7823	High	15.76	16	0.796	9.951	0.8621	High	15.37	15.52	0.734	9.181	0.7971	High	1428	1438	TADEGRVDSAM	16.26	2	9	15.38	15.89	4.925	54.72	0.8761	High		1379	1392	LEEKKKLEEEVSKL	26.39	3	12	26.35	26.59	3.504	29.203	0.9202	High
ULK1c	947	956	EIKELKQSRE	13.93	2	8	14.23	14.24	0.774	9.675	0.7981	High	14.33	14.55	0.885	11.059	0.8912	High	13.84	14.4	0.802	10.024	0.9009	High	1428	1439	TADEGRVDSAME	15.8	2	10	15.41	15.81	5.504	55.039	0.8705	High		1393	1409	RSSSFVPSPYVATAPEL	27.78	2	12	27.31	27.68	6.924	57.696	0.9035	High
ULK1c	947	956	EIKELKQSRE	13.93	3	8	14.14	14.51	0.688	8.604	0.8776	High	14.42	14.74	0.862	10.772	0.8946	High	13.9	14.27	0.899	11.243	0.8897	High	1443	1451	MSVQENIHM	23.12	2	7	23.24	23.43	5.016	71.659	0.8225	High		1397	1409	FVPSPYVATAPEL	26.75	2	8	26.61	26.71	4.081	51.014	0.7982	High
ULK1c	948	956	IKELKQSRE	11.83	2	7	12.12	12.64	0.719	10.277	0.9234	High	12.68	13.42	0.88	12.572	0.926	High	11.79	12.42	0.837	11.956	0.9437	High	1444	1451	SVQENIHM	20.22	2	6	19.85	20.16	3.886	64.77	0.8618	High		1410	1427	YGACAPELPGESDRSAVE	22.57	2	14	22.63	22.99	6.612	47.226	0.9068	High
ULK1c	948	956	IKELKQSRE	11.83	3	7	12.11	12.53	0.812	11.605	0.8455	High	12.76	13.33	0.948	13.539	0.8943	High	11.77	12.34	0.914	13.056	0.9111	High	1452	1461	LSEEKQRIML	23.63	2	8	23.05	23.46	5.424	67.799	0.9126	High		1410	1438	YGACAPELPGESDRSAVETADEGRVDSAM	26.44	3	25	26.15	26.48	12.863	51.453	0.7743	High
ULK1c	948	975	IKELKQSREIVLEDLKKLHVENDEKLQL	27.98	3	26	27.93	28.23	2.991	11.505	0.828	High	27.85	28.07	3.201	12.312	0.8664	High	27.76	28.1	3.219	12.381	0.8559	High	1452	1461	LSEEKQRIML	23.63	3	8	23.01	23.4	5.356	66.952	0.8505	High		1415	1427	PELPGESDRSAVE	19.14	2	10	19.08	19.53	5.192	51.916	0.8943	High
ULK1c	948	975	IKELKQSREIVLEDLKKLHVENDEKLQL	27.98	4	26	27.84	28.19	2.576	9.908	0.8311	High	27.78	28.24	3.365	12.941	0.8609	High	27.73	28.11	3.134	12.052	0.9002	High	1452	1462	LSEEKQRIMLL	27.79	2	9	26.99	27.38	5.858	65.091	0.9194	High		1428	1438	TADEGRVDSAM	16.26	2	9	15.96	16.32	4.611	51.23	0.9034	High
ULK1c	957	970	IVLEDLKKLHVEND	23.63	2	12	23.76	24.01	1.614	13.449	0.857	High	23.65	24	1.859	15.493	0.9089	High	23.59	24	1.647	13.726	0.9269	High	1462	1467	LERTLQ	12.77	2	4	12.33	12.66	2.99	74.741	0.8571	High		1428	1439	TADEGRVDSAME	15.8	2	10	15.96	16.17	5.199	51.993	0.8947	High
ULK1c	957	970	IVLEDLKKLHVEND	23.63	3	12	23.69	24.08	1.427	11.893	0.893	High	23.64	24.06	1.823	15.189	0.9214	High	23.6	24	1.694	14.118	0.9152	High	1462	1468	LERTLQL	23.75	2	5	23.42	23.81	3.512	70.232	0.8963	High		1443	1451	MSVQENIHM	23.12	2	7	22.91	23.1	4.449	63.556	0.7386	High
ULK1c	957	975	IVLEDLKKLHVENDEKLQL	26.39	2	17	26.49	26.95	1.748	10.28	0.9195	High	26.44	26.9	2.19	12.882	0.9323	High	26.41	26.88	2.057	12.101	0.9296	High	1462	1480	LERTLQLKEEENKRLNQRL	24.12	3	17	23.76	23.85	11.018	64.81	0.8348	High		1444	1451	SVQENIHM	20.22	2	6	20.11	20.33	3.92	65.331	0.7568	High
ULK1c	957	975	IVLEDLKKLHVENDEKLQL	26.39	3	17	26.45	27.05	1.709	10.053	0.9123	High	26.42	26.98	2.128	12.52	0.9379	High	26.36	26.96	2.038	11.986	0.938	High	1468	1480	LKEEENKRLNQRL	19.85	2	11	19.35	19.64	6.545	59.497	0.9113	High		1452	1461	LSEEKQRIML	23.63	2	8	23.55	23.88	5.278	65.98	0.871	High
ULK1c	957	975	IVLEDLKKLHVENDEKLQL	26.39	4	17	26.4	27.02	1.738	10.223	0.9422	High	26.42	26.97	2.173	12.784	0.9424	High	26.34	26.95	2.07	12.179	0.9302	High	1469	1480	KEEENKRLNQRL	18.51	2	10	17.71	18.1	5.609	56.088	0.929	High		1452	1461	LSEEKQRIML	23.63	3	8	23.56	23.82	5.24	65.497	0.8691	High
ULK1c	960	975	EDLKKLHVENDEKLQL	22.71	2	14	22.64	22.74	1.466	10.474	0.7186	High	22.64	22.93	1.845	13.181	0.9052	High	22.46	22.95	1.659	11.851	0.8893	High	1481	1508	MSQSMSSVSSRHSEKIAIRDFQVGDLVL	33.76	3	26	33.32	33.88	8.532	32.815	0.9054	High		1452	1462	LSEEKQRIMLL	27.79	2	9	27.56	27.83	5.678	63.092	0.9053	High
ULK1c	960	975	EDLKKLHVENDEKLQL	22.71	3	14	22.64	23.03	1.354	9.668	0.9292	High	22.62	23.05	1.795	12.82	0.9236	High	22.5	23	1.766	12.618	0.9236	High	1486	1506	SSVSSRHSEKIAIRDFQVGDL	29.25	3	19	28.85	29.13	6.182	32.538	0.8861	High		1462	1467	LERTLQ	12.77	2	4	13.04	13.09	2.931	73.284	0.8737	High
ULK1c	981	990	QSLEQSHLKE	15.48	2	8	15.43	15.59	1.147	14.341	0.8585	High	15.54	15.94	1.444	18.045	0.9225	High	15.22	15.61	1.363	17.036	0.911	High	1488	1508	VSSRHSEKIAIRDFQVGDLVL	33.73	3	19	33.04	33.4	4.556	23.98	0.8809	High		1462	1468	LERTLQL	23.75	2	5	23.87	24.18	3.408	68.169	0.8976	High
ULK1c	981	995	QSLEQSHLKELEDTL	26.16	2	13	26.23	26.57	1.415	10.881	0.9298	High	26.19	26.55	1.728	13.289	0.9463	High	26.11	26.49	1.668	12.828	0.9459	High	1501	1508	FQVGDLVL	33.1	2	6	32.54	32.86	0.971	16.179	0.919	High		1462	1480	LERTLQLKEEENKRLNQRL	24.12	3	17	24.03	24.24	10.917	64.22	0.8149	High
ULK1c	989	995	KELEDTL	18.34	2	5	18.52	18.67	0.178	3.56	0.8959	High	18.53	18.71	0.303	6.053	0.9053	High	18.31	18.53	0.271	5.42	0.8919	High	1509	1520	IILDERHDNYVL	26.86	2	10	26.49	26.88	2.328	23.283	0.9444	High		1468	1480	LKEEENKRLNQRL	19.85	2	11	19.77	19.99	6.512	59.196	0.9313	High
ULK1c	996	1002	QVRHIQE	11.61	2	5	11.81	12.03	1.194	23.876	0.9144	High	12.56	12.78	1.319	26.384	0.9228	High	11.48	11.77	1.25	24.996	0.9232	High	1528	1535	YFLHSESL	25.95	2	6	25.48	25.94	2.447	40.79	0.9225	High		1469	1480	KEEENKRLNQRL	18.51	2	10	18.09	18.37	5.861	58.609	0.8815	High
ULK1c	1003	1014	FEKVMTDHRVSL	21.07	2	10	21.07	21.41	1.236	12.363	0.939	High	21.04	21.35	1.336	13.363	0.9466	High	21.05	21.29	1.252	12.522	0.9549	High	1529	1535	FLHSESL	22.07	2	5	21.37	21.83	1.872	37.441	0.8829	High		1481	1500	MSQSMSSVSSRHSEKIAIRD	20.92	3	18	21	21.19	7.376	40.978	0.8863	High
ULK1c	1003	1014	FEKVMTDHRVSL	21.07	3	10	21.11	21.39	1.155	11.546	0.9314	High	21.1	21.37	1.317	13.165	0.9311	High	21.01	21.31	1.247	12.473	0.9392	High	1529	1538	FLHSESLPAL	27.94	2	7	27.06	27.63	2.242	32.03	0.927	High		1481	1508	MSQSMSSVSSRHSEKIAIRDFQVGDLVL	33.76	3	26	33.68	34	7.981	30.698	0.9049	High
ULK1c	1003	1016	FEKVMTDHRVSLEE	20.52	3	12	20.35	20.55	1.156	9.635	0.9012	High	20.29	20.54	1.347	11.228	0.8919	High	20.22	20.45	1.3	10.835	0.9189	High	1539	1556	DLKPGEGASGASRRPWVL	27.5	2	14	27.03	27.56	6.919	49.424	0.9281	High		1486	1505	SSVSSRHSEKIAIRDFQVGD	25.05	3	18	24.84	25.06	5.27	29.28	0.8842	High
ULK1c	1004	1014	EKVMTDHRVSL	18.99	2	9	19.04	19.44	0.705	7.832	0.8364	High	19.05	19.41	0.923	10.25	0.7709	High	18.91	19.34	0.824	9.155	0.8153	High	1539	1557	DLKPGEGASGASRRPWVLG	26.3	3	15	25.76	26.13	7.432	49.547	0.912	High		1486	1506	SSVSSRHSEKIAIRDFQVGDL	29.25	3	19	29.2	29.42	5.611	29.531	0.9277	High
ULK1c	1004	1014	EKVMTDHRVSL	18.99	3	9	19.11	19.3	0.781	8.677	0.7982	High	19.07	19.4	0.847	9.415	0.8493	High	18.92	19.33	0.764	8.492	0.8377	High	1539	1563	DLKPGEGASGASRRPWVLGKVMEKE	27.44	3	21	26.96	27.53	7.27	34.621	0.8221	High		1488	1508	VSSRHSEKIAIRDFQVGDLVL	33.73	3	19	33.46	33.66	4.454	23.44	0.8979	High
ULK1c	1015	1027	EELKKENQQIINQ	15.58	2	11	15.72	15.96	0.343	3.122	0.9094	High	15.77	15.98	0.509	4.627	0.9499	High	15.59	15.77	0.317	2.881	0.8777	High	1557	1582	GKVMEKEYCQAKKAQNRFKVPLGTKF	27.81	3	23	27	27.52	11.113	48.319	0.9274	High		1501	1508	FQVGDLVL	33.1	2	6	32.91	33.33	1.605	26.748	0.7915	High
ULK1c	1016	1027	ELKKENQQIINQ	14.98	2	10	15.18	15.44	0.241	2.411	0.8473	High	15.23	15.63	0.312	3.118	0.8833	High	14.92	15.34	0.266	2.659	0.8884	High	1557	1582	GKVMEKEYCQAKKAQNRFKVPLGTKF	27.81	4	23	26.98	27.52	11.895	51.717	0.9196	High		1509	1520	IILDERHDNYVL	26.86	2	10	26.98	27.24	2.136	21.364	0.9329	High
ULK1c	1017	1027	LKKENQQIINQ	14.33	2	9	14.35	14.6	0.35	3.887	0.9385	High	14.54	14.78	0.442	4.913	0.9447	High	14.04	14.35	0.368	4.086	0.9451	High	1562	1582	KEYCQAKKAQNRFKVPLGTKF	25.82	3	18	25.63	25.98	9.477	52.65	0.8725	High		1528	1535	YFLHSESL	25.95	2	6	25.99	26.28	2.252	37.525	0.9043	High
ULK1c	1017	1027	LKKENQQIINQ	14.33	3	9	14.42	14.61	0.169	1.882	0.8	High	14.57	14.81	0.234	2.605	0.888	High	14.1	14.34	0.25	2.777	0.8525	High	1564	1582	YCQAKKAQNRFKVPLGTKF	26.3	2	16	25.53	25.95	8.913	55.705	0.9097	High		1529	1535	FLHSESL	22.07	2	5	21.89	22.18	1.734	34.677	0.8288	High
ULK1c	1018	1027	KKENQQIINQ	12.67	2	8	12.88	13.18	0.292	3.656	0.9347	High	13.38	13.69	0.332	4.146	0.9326	High	12.51	12.89	0.325	4.059	0.9482	High	1564	1582	YCQAKKAQNRFKVPLGTKF	26.3	3	16	25.56	25.86	9.04	56.502	0.9348	High		1529	1538	FLHSESLPAL	27.94	2	7	27.65	27.89	2.069	29.559	0.9085	High
ULK1c	1028	1035	IQESHAEI	15.24	2	6	15.38	15.68	0.254	4.233	0.8662	High	15.51	15.87	0.412	6.872	0.9022	High	15.09	15.45	0.398	6.627	0.9088	High	1564	1582	YCQAKKAQNRFKVPLGTKF	26.3	4	16	25.48	25.94	9.393	58.703	0.914	High		1539	1556	DLKPGEGASGASRRPWVL	27.5	2	14	27.64	28.05	6.655	47.535	0.9304	High
ULK1c	1028	1045	IQESHAEIIQEKEKQLQE	19.68	2	16	19.75	20.11	0.65	4.065	0.8824	High	19.67	20.11	0.796	4.972	0.9216	High	19.61	20.01	0.755	4.718	0.9188	High	1567	1582	AKKAQNRFKVPLGTKF	25.77	3	13	25.13	25.55	6.875	52.887	0.9044	High		1539	1557	DLKPGEGASGASRRPWVLG	26.3	3	15	26.27	26.44	7.136	47.57	0.715	High
ULK1c	1028	1045	IQESHAEIIQEKEKQLQE	19.68	3	16	19.7	20.23	0.685	4.279	0.9463	High	19.65	20.16	0.82	5.127	0.9522	High	19.57	20.11	0.704	4.398	0.9517	High	1568	1582	KKAQNRFKVPLGTKF	25.67	2	12	25.03	25.21	5.819	48.495	0.8554	High		1539	1563	DLKPGEGASGASRRPWVLGKVMEKE	27.44	3	21	27.49	27.81	7.165	34.117	0.8952	High
ULK1c	1028	1048	IQESHAEIIQEKEKQLQELKL	25.43	3	19	25.42	25.56	0.76	4	0.9127	High	25.34	25.51	0.974	5.124	0.8921	High	25.29	25.48	0.754	3.968	0.9033	High	1568	1582	KKAQNRFKVPLGTKF	25.67	3	12	25.06	25.3	5.762	48.017	0.9172	High		1557	1582	GKVMEKEYCQAKKAQNRFKVPLGTKF	27.81	3	23	27.47	27.68	11.74	51.045	0.8936	High
ULK1c	1028	1060	IQESHAEIIQEKEKQLQELKLKVSDLSDTRCKL	27.26	4	31	27.17	27.39	2.156	6.954	0.8699	High	27.15	27.33	2.434	7.852	0.8809	High	27.08	27.27	2.353	7.59	0.9281	High	1583	1590	YRVKAVSW	24.69	2	6	24.12	24.55	1.742	29.041	0.8974	High		1557	1582	GKVMEKEYCQAKKAQNRFKVPLGTKF	27.81	4	23	27.48	27.68	12.089	52.563	0.8533	High
ULK1c	1034	1045	EIIQEKEKQLQE	18.09	2	10	18.23	18.69	0.298	2.977	0.9412	High	18.2	18.6	0.387	3.868	0.9473	High	18.07	18.62	0.366	3.663	0.9488	High														1562	1582	KEYCQAKKAQNRFKVPLGTKF	25.82	3	18	25.93	26.09	9.74	54.109	0.9078	High
ULK1c	1034	1045	EIIQEKEKQLQE	18.09	3	10	18.29	18.55	0.28	2.798	0.7592	High	18.26	18.52	0.306	3.058	0.7599	High	18.14	18.45	0.293	2.929	0.8323	High														1564	1582	YCQAKKAQNRFKVPLGTKF	26.3	2	16	25.98	26.22	9.206	57.534	0.8531	High
ULK1c	1036	1045	IQEKEKQLQE	12.89	2	8	13.04	13.26	0.283	3.537	0.8371	High	13.46	13.68	0.311	3.894	0.8559	High	12.67	12.91	0.304	3.799	0.9202	High														1564	1582	YCQAKKAQNRFKVPLGTKF	26.3	3	16	25.99	26.26	9.198	57.489	0.933	High
ULK1c	1046	1053	LKLKVSDL	22.21	2	6	22.17	22.48	0.511	8.523	0.6924	High	22.18	22.48	0.561	9.356	0.8802	High	22.18	22.29	0.523	8.716	0.8583	High														1564	1582	YCQAKKAQNRFKVPLGTKF	26.3	4	16	26.01	26.28	9.256	57.852	0.8311	High
ULK1c	1046	1060	LKLKVSDLSDTRCKL	23.51	3	13	23.35	23.78	0.99	7.616	0.8798	High	23.36	23.78	1.397	10.743	0.9028	High	23.29	23.78	1.225	9.427	0.9367	High														1567	1582	AKKAQNRFKVPLGTKF	25.77	3	13	25.69	25.85	7.262	55.865	0.8866	High
ULK1c	1049	1060	KVSDLSDTRCKL	19.64	2	10	19.68	20.22	1.074	10.744	0.9121	High	19.71	20.22	1.279	12.791	0.9335	High	19.64	20.12	1.193	11.928	0.9322	High														1568	1582	KKAQNRFKVPLGTKF	25.67	2	12	25.5	25.68	6.109	50.91	0.8674	High
ULK1c	1049	1060	KVSDLSDTRCKL	19.64	3	10	19.75	20.15	1.003	10.034	0.8981	High	19.66	20.22	1.28	12.796	0.9214	High	19.65	20.1	1.176	11.763	0.9253	High														1568	1582	KKAQNRFKVPLGTKF	25.67	3	12	25.49	25.7	6.188	51.565	0.8956	High
ULK1c	1054	1060	SDTRCKL	14.73	2	5	14.95	15.21	0.306	6.11	0.8164	High	15.2	15.52	0.371	7.425	0.8489	High	14.67	15.07	0.349	6.985	0.8417	High														1583	1590	YRVKAVSW	24.69	2	6	24.68	24.93	1.633	27.219	0.8735	High
ULK1c	1064	1073	LALKEAETDE	16.63	2	8	16.63	17.18	0.196	2.445	0.8284	High	16.73	17.06	0.203	2.541	0.7782	High	16.46	16.88	0.317	3.959	0.8606	High
ULK1c	1065	1073	ALKEAETDE	11.37	2	7	11.49	11.83	0.128	1.832	0.8159	High	12.26	12.86	0.24	3.429	0.7016	High	11.22	11.79	0.234	3.342	0.8892	High
ULK1c	1074	1078	IKILL	23.93	2	3	24.04	24.16	0.016	0.546	0.8535	High	24.04	24.28	0.014	0.464	0.8486	High	24.03	24.13	0.014	0.452	0.8565	High
ULK1c	1078	1093	LEESRAQQKETLKSLL	23.68	3	14	23.72	23.97	9.643	68.879	0.8491	High	23.64	24.01	9.701	69.295	0.8502	High	23.56	23.94	9.502	67.869	0.8357	High
ULK1c	1079	1089	EESRAQQKETL	13.66	2	9	13.74	14.14	6.424	71.382	0.8489	High	14.03	14.53	6.337	70.407	0.9174	High	13.36	13.82	6.31	70.107	0.8761	High
ULK1c	1094	1100	EQETENL	14.04	2	5	13.91	14.12	2.403	48.06	0.687	High	14.36	14.67	2.455	49.104	0.8694	High	13.66	14.02	2.416	48.329	0.8529	High
ULK1c	1100	1107	LRTEISKL	19.66	2	6	19.77	20.13	0.458	7.639	0.922	High	19.72	20.14	0.579	9.644	0.9232	High	19.62	20.05	0.531	8.85	0.9297	High
ULK1c	1101	1107	RTEISKL	17.1	2	5	17.26	17.44	0.169	3.388	0.8612	High	17.26	17.68	0.261	5.217	0.8979	High	17.08	17.24	0.228	4.556	0.8761	High
ULK1c	1101	1116	RTEISKLNQKIQDNNE	19.08	3	14	19.07	19.36	1.187	8.481	0.7504	High	19	19.33	1.382	9.872	0.8126	High	18.88	19.28	1.343	9.592	0.81	High
ULK1c	1108	1122	NQKIQDNNENYQVGL	20.21	2	13	19.64	19.97	2.269	17.456	0.9256	High	19.6	19.92	2.474	19.03	0.9346	High	19.5	19.84	2.455	18.881	0.9328	High
ULK1c	1130	1136	TIEKDQC	10.88	2	5	10.79	11.23	0.029	0.571	0.7735	High	11.65	12	0.105	2.1	0.8073	High	10.86	11.08	0.139	2.784	0.8701	High
ULK1c	1140	1148	LISRHEEES	11.27	2	7	11.4	11.46	0.308	4.396	0.6472	High	12.24	12.48	0.317	4.524	0.862	High	11.22	11.36	0.347	4.964	0.8607	High
ULK1c	1140	1151	LISRHEEESNIL	20.15	2	10	20.38	20.65	0.508	5.083	0.9444	High	20.34	20.63	0.582	5.819	0.9408	High	20.28	20.54	0.535	5.347	0.9547	High
ULK1c	1141	1151	ISRHEEESNIL	18.89	2	9	19.1	19.36	0.512	5.692	0.9338	High	19.13	19.4	0.607	6.745	0.8914	High	18.96	19.23	0.512	5.694	0.9301	High
ULK1c	1156	1165	NKVTSLHNQA	13.37	2	8	12.97	13.16	3.439	42.987	0.827	High	13.44	13.65	3.696	46.199	0.8599	High	12.59	12.82	3.649	45.616	0.8787	High
ULK1c	1156	1166	NKVTSLHNQAF	18.6	2	9	18.75	19.15	4.077	45.296	0.891	High	18.83	19.15	4.323	48.031	0.862	High	18.64	19.03	4.178	46.418	0.8998	High
ULK1c	1156	1167	NKVTSLHNQAFE	18.23	2	10	18.25	18.74	4.555	45.554	0.8817	High	18.28	18.66	4.806	48.058	0.9075	High	18.14	18.55	4.69	46.903	0.8782	High
ULK1c	1168	1179	IEKNLKEQIIEL	24.51	2	10	24.52	25.04	0.317	3.167	0.9413	High	24.52	24.99	0.388	3.879	0.9448	High	24.45	24.96	0.348	3.479	0.93	High
ULK1c	1180	1187	QSKLDSEL	18.55	2	6	18.54	18.83	1.404	23.407	0.8029	High	18.58	18.91	1.596	26.605	0.8708	High	18.4	18.77	1.54	25.665	0.8915	High
ULK1c	1191	1212	ERQKDEKITQQEEKYEAIIQNL	27.28	3	20	27.15	27.32	2.479	12.397	0.7157	High	27.13	27.38	2.928	14.639	0.8725	High	27.12	27.39	2.827	14.133	0.8158	High
ULK1c	1213	1230	EKDRQKLVSSQEQDREQL	17.76	3	16	17.85	18.13	5.729	35.808	0.8799	High	17.78	18.21	6.078	37.986	0.8831	High	17.64	18	5.792	36.201	0.9066	High
ULK1c	1231	1236	IQKLNC	14.82	2	4	14.95	15.17	0.735	18.38	0.862	High	15.23	15.87	0.792	19.799	0.866	High	14.7	14.95	0.733	18.314	0.8503	High
ULK1c	1231	1248	IQKLNCEKDEAIQTALKE	22.01	3	16	22.38	22.69	1.612	10.075	0.8421	High	22.36	22.64	1.749	10.929	0.8918	High	22.3	22.58	1.727	10.792	0.8291	High
ULK1c	1237	1248	EKDEAIQTALKE	18.91	2	10	18.97	19.21	1.175	11.747	0.8827	High	18.86	19.28	1.242	12.42	0.9026	High	18.85	19.13	1.155	11.553	0.8894	High
ULK1c	1242	1248	IQTALKE	14.29	2	5	14.44	14.58	0.922	18.435	0.8441	High	14.74	15.05	0.999	19.989	0.8006	High	14.15	14.3	0.948	18.958	0.8186	High
ULK1c	1249	1254	FKLERE	17.15	2	4	17.32	17.44	1.108	27.709	0.8438	High	17.5	17.54	1.184	29.606	0.7759	High	17.07	17.43	1.152	28.801	0.8559	High
ULK1c	1249	1261	FKLEREVVEKELL	25.31	2	11	25.41	25.53	1.756	15.963	0.8864	High	25.37	25.63	1.956	17.784	0.8711	High	25.3	25.66	1.852	16.841	0.9139	High
ULK1c	1249	1261	FKLEREVVEKELL	25.31	3	11	25.41	25.66	1.652	15.014	0.8276	High	25.37	25.66	1.829	16.627	0.8656	High	25.31	25.68	1.685	15.32	0.8855	High
ULK1c	1249	1270	FKLEREVVEKELLEKVKHLENQ	27.88	3	20	27.86	28.12	2.825	14.127	0.6621	High	27.94	28.07	3.022	15.11	0.7909	High	27.83	27.99	2.745	13.725	0.9025	High
ULK1c	1249	1287	FKLEREVVEKELLEKVKHLENQIAKSPAIDSTRGDSSSL	30.44	4	36	30.4	30.73	11.276	31.324	0.774	High	30.32	30.5	11.79	32.751	0.8183	High	30.38	30.54	11.385	31.625	0.8999	High
ULK1c	1255	1261	VVEKELL	19.55	2	5	19.56	19.8	0.177	3.534	0.8462	High	19.54	19.83	0.15	3.006	0.8622	High	19.42	19.7	0.2	3.996	0.81	High
ULK1c	1255	1287	VVEKELLEKVKHLENQIAKSPAIDSTRGDSSSL	28.61	4	30	28.66	28.83	10.266	34.22	0.6743	High	28.59	28.83	9.845	32.818	0.8403	High	28.51	28.77	10.317	34.391	0.8701	High
ULK1c	1262	1270	EKVKHLENQ	10.93	2	7	10.99	11.27	0.709	10.134	0.8267	High	11.84	12.15	0.798	11.402	0.8616	High	10.83	11.13	0.856	12.225	0.8683	High
ULK1c	1262	1287	EKVKHLENQIAKSPAIDSTRGDSSSL	20.34	3	23	20.2	20.67	10.294	44.758	0.9282	High	20.15	20.6	10.377	45.118	0.9167	High	20.1	20.55	10.484	45.583	0.9317	High
ULK1c	1271	1287	IAKSPAIDSTRGDSSSL	17.44	2	14	17.77	17.88	8.575	61.248	0.7701	High	17.61	17.91	8.525	60.893	0.8005	High	17.44	17.73	8.333	59.519	0.8212	High
ULK1c	1271	1287	IAKSPAIDSTRGDSSSL	17.44	3	14	17.59	17.95	8.661	61.862	0.8197	High	17.54	17.97	8.651	61.792	0.8995	High	17.36	17.82	8.563	61.165	0.8672	High
ULK1c	1288	1302	VAELQEKLQEEKAKF	23.83	3	13	23.69	23.86	4.562	35.095	0.8937	High	23.8	24.07	4.882	37.553	0.9173	High	23.75	24	4.462	34.325	0.9105	High
ULK1c	1291	1302	LQEKLQEEKAKF	19.35	3	10	19.25	19.43	3.087	30.867	0.8363	High	19.49	19.67	3.277	32.77	0.8841	High	19.23	19.59	3.173	31.735	0.908	High
ULK1c	1292	1302	QEKLQEEKAKF	17.86	2	9	17.87	18.01	2.925	32.506	0.8705	High	17.94	18.46	3.055	33.946	0.9231	High	17.81	18.05	2.937	32.629	0.9109	High
ULK1c	1292	1302	QEKLQEEKAKF	17.86	3	9	17.91	18.07	2.826	31.4	0.8655	High	18.09	18.39	3.114	34.598	0.8959	High	17.9	18.26	2.966	32.957	0.9039	High
ULK1c	1303	1324	LEQLEEQEKRKNEEMQNVRTSL	22.14	3	20	22.09	22.3	11.453	57.266	0.7163	High	22.01	22.28	11.805	59.025	0.8118	High	21.99	22.21	11.329	56.643	0.8876	High
ULK1c	1306	1319	LEEQEKRKNEEMQN	11.83	2	12	11.79	11.97	5.473	45.609	0.7349	High	12.64	12.75	5.558	46.316	0.775	High	11.49	11.76	5.483	45.688	0.7633	High
ULK1c	1306	1324	LEEQEKRKNEEMQNVRTSL	19.88	3	17	19.8	19.96	10.199	59.994	0.7131	High	19.75	19.99	10.136	59.626	0.8001	High	19.73	19.91	9.747	57.336	0.8599	High
ULK1c	1307	1318	EEQEKRKNEEMQ	10.81	2	10	10.58	10.85	5.061	50.608	0.6175	High	11.41	11.68	5.066	50.66	0.7942	High	10.46	10.7	5.012	50.117	0.8503	High
ULK1c	1307	1324	EEQEKRKNEEMQNVRTSL	19.21	3	16	19.22	19.48	9.008	56.298	0.8774	High	19.18	19.49	9.337	58.356	0.8852	High	19.04	19.46	9.172	57.327	0.8702	High
ULK1c	1319	1324	NVRTSL	15.26	2	4	15.39	15.77	3.365	84.132	0.8293	High	15.58	16.02	3.381	84.519	0.8697	High	15.16	15.48	3.382	84.556	0.8498	High
ULK1c	1337	1349	TREKMRKENIIND	16.62	2	11	16.75	17	5.909	53.719	0.8371	High	16.77	17	5.922	53.833	0.829	High	16.58	16.84	5.744	52.221	0.8636	High
ULK1c	1337	1354	TREKMRKENIINDLSDKL	25.67	3	16	25.59	25.78	4.909	30.682	0.7869	High	25.61	25.9	5.15	32.189	0.8524	High	25.53	25.83	5.026	31.415	0.8259	High
ULK1c	1337	1358	TREKMRKENIINDLSDKLKSTM	28.01	4	20	27.65	27.72	6.766	33.83	0.5936	High	27.64	27.89	6.538	32.688	0.7672	High	27.52	27.82	6.533	32.664	0.8056	High
ULK1c	1337	1366	TREKMRKENIINDLSDKLKSTMQQQERDKD	27.72	4	28	27.42	27.83	9.354	33.408	0.9196	High	27.32	27.79	9.948	35.527	0.9281	High	27.31	27.78	9.428	33.67	0.948	High
ULK1c	1337	1369	TREKMRKENIINDLSDKLKSTMQQQERDKDLIE	28.78	3	31	28.76	29.11	9.396	30.309	0.8633	High	28.65	29.04	9.896	31.923	0.895	High	28.63	29.05	9.516	30.697	0.8848	High
ULK1c	1337	1369	TREKMRKENIINDLSDKLKSTMQQQERDKDLIE	28.78	4	31	28.69	29.22	9.29	29.967	0.9341	High	28.6	29.15	9.784	31.563	0.9273	High	28.58	29.13	9.342	30.136	0.9469	High
ULK1c	1337	1369	TREKMRKENIINDLSDKLKSTMQQQERDKDLIE	28.78	5	31	28.67	29.12	9.487	30.604	0.9018	High	28.65	29.09	9.854	31.788	0.9379	High	28.62	29.09	9.324	30.078	0.9352	High
ULK1c	1337	1371	TREKMRKENIINDLSDKLKSTMQQQERDKDLIESL	30.86	4	33	30.6	30.96	8.965	27.168	0.8529	High	30.57	30.93	9.623	29.162	0.8474	High	30.47	30.93	9.351	28.337	0.884	High
ULK1c	1350	1366	LSDKLKSTMQQQERDKD	18.13	2	15	18.07	18.26	4.197	27.98	0.7444	High	17.97	18.36	4.553	30.354	0.871	High	17.85	18.22	4.363	29.084	0.7593	High
ULK1c	1350	1366	LSDKLKSTMQQQERDKD	18.13	3	15	17.99	18.38	4.088	27.253	0.9267	High	17.97	18.39	4.545	30.302	0.8821	High	17.82	18.3	4.352	29.01	0.9078	High
ULK1c	1350	1369	LSDKLKSTMQQQERDKDLIE	21.74	2	18	21.51	21.85	4.005	22.252	0.8541	High	21.51	21.82	4.559	25.326	0.876	High	21.42	21.75	4.295	23.859	0.8754	High
ULK1c	1350	1369	LSDKLKSTMQQQERDKDLIE	21.74	3	18	21.59	21.76	4.394	24.409	0.8888	High	21.59	21.88	4.665	25.917	0.906	High	21.56	21.71	4.327	24.037	0.9126	High
ULK1c	1350	1369	LSDKLKSTMQQQERDKDLIE	21.74	4	18	21.62	21.79	4.51	25.054	0.8559	High	21.64	21.75	4.704	26.133	0.8377	High	21.55	21.69	4.67	25.943	0.8932	High
ULK1c	1350	1371	LSDKLKSTMQQQERDKDLIESL	26.37	3	20	26.19	26.41	4.423	22.114	0.7907	High	26.12	26.39	4.462	22.31	0.9196	High	26.03	26.33	4.276	21.379	0.9085	High
ULK1c	1351	1369	SDKLKSTMQQQERDKDLIE	20.39	3	17	20.48	20.62	4.044	23.788	0.8268	High	20.42	20.63	4.302	25.305	0.7393	High	20.3	20.54	4.52	26.588	0.7612	High
ULK1c	1370	1378	SLSEDRARL	18.32	2	7	18.24	18.34	0.454	6.486	0.8865	High	18.19	18.63	0.375	5.354	0.945	High	18.02	18.49	0.335	4.779	0.9537	High
ULK1c	1370	1392	SLSEDRARLLEEKKKLEEEVSKL	28.93	3	21	28.98	29.3	0.954	4.542	0.9575	High	28.89	29.19	1.117	5.318	0.957	High	28.89	29.2	0.979	4.663	0.9513	High
ULK1c	1370	1392	SLSEDRARLLEEKKKLEEEVSKL	28.93	4	21	29.02	29.26	1.049	4.993	0.9244	High	28.93	29.24	1.132	5.389	0.9466	High	28.91	29.18	1.078	5.131	0.9502	High
ULK1c	1370	1392	SLSEDRARLLEEKKKLEEEVSKL	28.93	5	21	29	29.32	0.948	4.514	0.8658	High	28.95	29.25	1.196	5.697	0.9061	High	28.91	29.24	1.105	5.261	0.9199	High
ULK1c	1372	1392	SEDRARLLEEKKKLEEEVSKL	26.93	3	19	26.8	27.11	0.835	4.392	0.8458	High	26.77	27.07	1.01	5.318	0.8676	High	26.72	26.98	1.006	5.295	0.8879	High
ULK1c	1379	1387	LEEKKKLEE	12.36	2	7	12.71	12.92	0.038	0.536	0.8618	High	13.19	13.66	0.093	1.332	0.8723	High	12.26	12.81	0.086	1.228	0.8841	High
ULK1c	1379	1388	LEEKKKLEEE	13.44	2	8	13.71	13.89	0.029	0.363	0.9033	High	14.01	14.26	0.079	0.983	0.9101	High	13.36	13.61	0.07	0.873	0.8975	High
ULK1c	1379	1392	LEEKKKLEEEVSKL	23.4	2	12	23.22	23.64	0.864	7.197	0.9327	High	23.2	23.55	1.005	8.374	0.9484	High	23.14	23.43	0.919	7.662	0.9559	High
ULK1c	1379	1392	LEEKKKLEEEVSKL	23.4	3	12	23.23	23.68	0.858	7.151	0.9457	High	23.17	23.64	0.961	8.009	0.9499	High	23.1	23.61	0.931	7.761	0.9448	High
ULK1c	1379	1392	LEEKKKLEEEVSKL	23.4	4	12	23.27	23.55	0.87	7.246	0.7969	High	23.23	23.53	0.982	8.186	0.7866	High	23.18	23.47	0.893	7.44	0.8178	High
ULK1c	1379	1397	LEEKKKLEEEVSKLRSSSF	25.51	3	17	25.52	25.7	4.382	25.779	0.753	High	25.43	25.65	4.513	26.55	0.8549	High	25.37	25.65	4.428	26.047	0.8315	High
ULK1c	1379	1409	LEEKKKLEEEVSKLRSSSFVPSPYVATAPEL	27.42	3	26	27.12	27.86	10.778	41.455	0.9045	High	27.12	27.8	10.902	41.929	0.9136	High	27.13	27.77	10.777	41.451	0.9158	High
ULK1c	1379	1409	LEEKKKLEEEVSKLRSSSFVPSPYVATAPEL	27.42	4	26	27.2	27.73	10.61	40.806	0.8967	High	27.16	27.72	10.961	42.157	0.8955	High	27.11	27.61	10.65	40.963	0.8908	High
ULK1c	1393	1409	RSSSFVPSPYVATAPEL	24.86	2	12	24.18	24.42	8.246	68.715	0.9111	High	24.07	24.36	8.214	68.447	0.9166	High	23.99	24.3	8.176	68.131	0.9093	High
ULK1c	1398	1409	VPSPYVATAPEL	21.71	2	8	21.69	21.97	5.334	66.68	0.8403	High	21.73	22.05	5.449	68.115	0.8917	High	21.67	21.95	5.541	69.268	0.8518	High
ULK1c	1410	1427	YGACAPELPGESDRSAVE	20.2	2	14	20.42	20.86	8.07	57.644	0.9172	High	20.3	20.84	8.06	57.573	0.9349	High	20.29	20.74	8.018	57.274	0.9327	High
ULK1c	1410	1438	YGACAPELPGESDRSAVETADEGRVDSAM	23.38	3	25	23.29	23.63	15.242	60.968	0.8837	High	23.16	23.69	14.791	59.165	0.8878	High	23.14	23.64	14.941	59.765	0.8902	High
ULK1c	1415	1427	PELPGESDRSAVE	17.43	2	10	17.54	17.99	5.96	59.596	0.875	High	17.55	17.99	5.911	59.112	0.8807	High	17.41	17.84	5.856	58.56	0.8196	High
ULK1c	1428	1438	TADEGRVDSAM	14.89	2	9	15.12	15.45	5.285	58.726	0.917	High	15.24	15.63	5.28	58.662	0.9147	High	14.86	15.25	5.262	58.466	0.9206	High
ULK1c	1428	1439	TADEGRVDSAME	14.95	2	10	15.06	15.44	5.891	58.914	0.8971	High	15.21	15.53	5.812	58.122	0.9129	High	14.69	15.28	5.835	58.35	0.9087	High
ULK1c	1443	1451	MSVQENIHM	20.65	2	7	20.78	21.15	5.177	73.956	0.8801	High	20.76	21.1	5.159	73.704	0.8861	High	20.73	21.04	5.142	73.456	0.8662	High
ULK1c	1443	1461	MSVQENIHMLSEEKQRIML	27.66	3	17	27.49	27.72	11.609	68.288	0.91	High	27.43	27.79	11.482	67.543	0.8941	High	27.42	27.68	11.577	68.098	0.8744	High
ULK1c	1443	1480	MSVQENIHMLSEEKQRIMLLERTLQLKEEENKRLNQRL	29.53	5	36	29.33	29.54	14.872	41.312	0.8385	High	29.24	29.45	15.433	42.87	0.836	High	29.24	29.37	15.168	42.132	0.8576	High
ULK1c	1444	1451	SVQENIHM	18.47	2	6	18.56	18.72	4.377	72.956	0.7953	High	18.39	18.67	4.389	73.149	0.8553	High	18.24	18.54	4.321	72.009	0.8763	High
ULK1c	1452	1461	LSEEKQRIML	20.87	2	8	21.04	21.27	3.78	47.253	0.9156	High	21.02	21.3	3.911	48.89	0.9316	High	20.93	21.23	3.803	47.539	0.9299	High
ULK1c	1452	1461	LSEEKQRIML	20.87	3	8	20.98	21.43	3.767	47.09	0.8949	High	20.96	21.4	3.893	48.667	0.887	High	20.88	21.34	3.758	46.971	0.888	High
ULK1c	1452	1462	LSEEKQRIMLL	24.23	2	9	24.24	24.69	3.71	41.222	0.9265	High	24.25	24.67	3.819	42.432	0.9273	High	24.19	24.56	3.705	41.17	0.9222	High
ULK1c	1452	1462	LSEEKQRIMLL	24.23	3	9	24.28	24.63	3.803	42.256	0.8182	High	24.34	24.42	4	44.446	0.831	High	24.24	24.6	3.84	42.667	0.9112	High
ULK1c	1462	1467	LERTLQ	12.94	2	4	12.58	12.78	0.602	15.053	0.8989	High	13.2	13.44	0.734	18.343	0.8522	High	12.16	12.49	0.684	17.097	0.9372	High
ULK1c	1462	1468	LERTLQL	21.16	2	5	21.49	21.52	0.806	16.11	0.9263	High	21.27	21.52	0.938	18.756	0.9158	High	21.22	21.43	0.868	17.363	0.9351	High
ULK1c	1462	1480	LERTLQLKEEENKRLNQRL	21.25	3	17	21.23	21.34	4.26	25.057	0.8316	High	21.21	21.43	4.493	26.43	0.8824	High	21.14	21.34	4.107	24.161	0.8866	High
ULK1c	1462	1480	LERTLQLKEEENKRLNQRL	21.25	4	17	21.26	21.43	3.969	23.349	0.8846	High	21.21	21.53	4.479	26.347	0.9128	High	21.12	21.41	4.451	26.182	0.9163	High
ULK1c	1468	1480	LKEEENKRLNQRL	17.83	2	11	17.74	17.83	3.397	30.878	0.7209	High	17.77	18.18	3.41	31.004	0.9047	High	17.64	18.07	3.222	29.295	0.903	High
ULK1c	1468	1480	LKEEENKRLNQRL	17.83	3	11	17.84	17.87	3.257	29.608	0.8943	High	18.14	18.2	3.249	29.535	0.8856	High	17.61	18.12	3.279	29.813	0.9107	High
ULK1c	1468	1480	LKEEENKRLNQRL	17.83	4	11	17.9	17.93	3.358	30.524	0.7416	High	17.77	18.1	3.5	31.816	0.9203	High	17.64	18.05	3.432	31.197	0.8764	High
ULK1c	1469	1480	KEEENKRLNQRL	16.45	2	10	16.46	16.65	2.921	29.213	0.8562	High	16.56	16.91	3.052	30.522	0.9101	High	16.32	16.75	2.896	28.963	0.9212	High
ULK1c	1481	1500	MSQSMSSVSSRHSEKIAIRD	18.9	3	18	19.13	19.43	7.816	43.425	0.7802	High	18.94	19.25	7.837	43.542	0.8969	High	18.82	19.26	7.804	43.355	0.9046	High
ULK1c	1481	1506	MSQSMSSVSSRHSEKIAIRDFQVGDL	26.07	3	24	26.1	26.36	8.114	33.807	0.8602	High	26.06	26.35	8.079	33.661	0.9003	High	26.03	26.2	8.044	33.518	0.8301	High
ULK1c	1481	1508	MSQSMSSVSSRHSEKIAIRDFQVGDLVL	29.29	3	26	29.27	29.73	7.707	29.644	0.9244	High	29.24	29.7	7.626	29.33	0.932	High	29.27	29.57	7.632	29.354	0.9218	High
ULK1c	1486	1505	SSVSSRHSEKIAIRDFQVGD	21.99	3	18	22	22.34	4.983	27.683	0.8571	High	22	22.48	4.849	26.94	0.8585	High	21.91	22.41	4.807	26.703	0.8785	High
ULK1c	1486	1506	SSVSSRHSEKIAIRDFQVGDL	25.58	3	19	25.57	25.97	4.791	25.218	0.8789	High	25.52	26	4.97	26.156	0.9314	High	25.48	25.91	4.828	25.411	0.9152	High
ULK1c	1486	1508	SSVSSRHSEKIAIRDFQVGDLVL	29.1	4	21	28.99	29.57	4.688	22.323	0.9038	High	28.95	29.5	4.811	22.908	0.9161	High	28.96	29.42	4.689	22.329	0.9155	High
ULK1c	1501	1508	FQVGDLVL	29.17	2	6	29.06	29.32	1.002	16.699	0.8469	High	28.99	29.23	1.084	18.074	0.8352	High	28.93	29.2	1.118	18.628	0.8635	High
ULK1c	1509	1520	IILDERHDNYVL	23.79	2	10	23.82	24.37	1.53	15.302	0.9477	High	23.78	24.37	1.691	16.914	0.9478	High	23.73	24.3	1.643	16.431	0.9474	High
ULK1c	1509	1520	IILDERHDNYVL	23.79	3	10	23.78	24.34	1.53	15.303	0.915	High	23.79	24.3	1.723	17.226	0.9053	High	23.61	24.29	1.675	16.746	0.9252	High
ULK1c	1509	1521	IILDERHDNYVLF	27.75	2	11	27.6	28.07	1.626	14.777	0.8642	High	27.57	28.03	1.594	14.493	0.8159	High	27.54	27.93	1.433	13.027	0.8604	High
ULK1c	1528	1535	YFLHSESL	23	2	6	23.11	23.74	1.02	16.997	0.9042	High	23.05	23.2	1.112	18.527	0.9155	High	22.94	23.18	1.126	18.766	0.8925	High
ULK1c	1528	1538	YFLHSESLPAL	26.54	2	8	26.63	26.84	1.099	13.742	0.9013	High	26.54	26.76	1.198	14.978	0.8415	High	26.56	26.76	1.221	15.26	0.8805	High
ULK1c	1529	1538	FLHSESLPAL	24.49	2	7	24.55	24.65	1.153	16.47	0.9118	High	24.37	25	1.263	18.042	0.9284	High	24.3	24.94	1.214	17.35	0.9215	High
ULK1c	1539	1556	DLKPGEGASGASRRPWVL	24.21	2	14	24.25	24.88	6.78	48.431	0.9262	High	24.29	24.85	6.858	48.985	0.9363	High	24.25	24.73	6.7	47.859	0.9386	High
ULK1c	1539	1556	DLKPGEGASGASRRPWVL	24.21	3	14	24.26	24.87	6.942	49.583	0.9042	High	24.24	24.86	6.975	49.825	0.9209	High	24.18	24.86	6.9	49.285	0.9246	High
ULK1c	1539	1556	DLKPGEGASGASRRPWVL	24.21	4	14	24.36	24.73	6.831	48.79	0.8629	High	24.37	24.71	7.223	51.596	0.8558	High	24.31	24.65	7.096	50.687	0.8704	High
ULK1c	1539	1561	DLKPGEGASGASRRPWVLGKVME	24.67	3	19	24.76	25	6.891	36.271	0.8511	High	24.78	25.07	6.671	35.111	0.9019	High	24.68	25.02	6.687	35.195	0.8932	High
ULK1c	1557	1582	GKVMEKEYCQAKKAQNRFKVPLGTKF	24	3	23	23.9	24.36	11.142	48.443	0.887	High	23.78	24.38	11.321	49.22	0.9196	High	23.81	24.32	11.125	48.371	0.9036	High
ULK1c	1557	1582	GKVMEKEYCQAKKAQNRFKVPLGTKF	24	4	23	23.88	24.38	11.723	50.969	0.922	High	23.84	24.41	11.67	50.738	0.9238	High	23.79	24.29	11.625	50.543	0.9224	High
ULK1c	1557	1582	GKVMEKEYCQAKKAQNRFKVPLGTKF	24	5	23	23.91	24.27	11.992	52.14	0.8456	High	23.92	24.23	12.13	52.738	0.8612	High	23.84	24.22	11.92	51.825	0.8986	High
ULK1c	1562	1582	KEYCQAKKAQNRFKVPLGTKF	22.66	3	18	22.69	22.94	9.634	53.525	0.8616	High	22.64	22.98	9.639	53.551	0.9033	High	22.62	22.93	9.503	52.792	0.885	High
ULK1c	1562	1582	KEYCQAKKAQNRFKVPLGTKF	22.66	4	18	22.64	23.06	9.942	55.231	0.8727	High	22.59	23.12	10.008	55.599	0.8816	High	22.53	23.05	9.833	54.629	0.9023	High
ULK1c	1564	1582	YCQAKKAQNRFKVPLGTKF	22.64	2	16	22.8	23.16	9.178	57.36	0.8993	High	22.88	23.04	9.251	57.818	0.8683	High	22.73	23.05	9.238	57.735	0.8722	High
ULK1c	1564	1582	YCQAKKAQNRFKVPLGTKF	22.64	3	16	22.75	23.22	9.196	57.474	0.9203	High	22.8	23.03	9.266	57.915	0.9357	High	22.73	22.95	9.143	57.144	0.9192	High
ULK1c	1564	1582	YCQAKKAQNRFKVPLGTKF	22.64	4	16	22.74	23.31	9.205	57.53	0.9319	High	22.72	23.31	9.326	58.29	0.9215	High	22.62	23.24	9.183	57.395	0.9233	High
ULK1c	1566	1582	QAKKAQNRFKVPLGTKF	22.54	3	14	22.5	22.82	7.621	54.437	0.8921	High	22.46	22.83	7.467	53.333	0.8948	High	22.4	22.76	7.504	53.601	0.8996	High
ULK1c	1568	1582	KKAQNRFKVPLGTKF	22.45	4	12	22.5	22.81	6.561	54.672	0.8369	High	22.46	22.79	6.678	55.654	0.8212	High	22.38	22.69	6.473	53.938	0.8423	High
ULK1c	1583	1590	YRVKAVSW	21.89	2	6	21.94	22.29	1.451	24.188	0.8924	High	21.89	22.41	1.578	26.299	0.8774	High	21.82	22.3	1.562	26.029	0.89	High
ULK1c	1583	1598	YRVKAVSWNKKVPGAS	19.5	2	13	19.59	19.97	5.67	43.617	0.7977	High	19.5	20	5.838	44.908	0.8477	High	19.46	19.93	5.63	43.304	0.8493	High
ULK1c	1583	1598	YRVKAVSWNKKVPGAS	19.5	3	13	19.6	19.82	5.914	45.491	0.9082	High	19.52	19.76	5.961	45.853	0.9051	High	19.42	19.67	5.923	45.558	0.9222	High
ULK1c	1583	1598	YRVKAVSWNKKVPGAS	19.5	4	13	19.68	19.98	6.129	47.148	0.9	High	19.65	19.85	6.195	47.653	0.9051	High	19.49	19.81	6.152	47.325	0.9077	High
ULK1c	1583	1599	YRVKAVSWNKKVPGASM	21.29	3	14	21.22	21.51	6.621	47.291	0.9373	High	21.19	21.48	6.564	46.888	0.9382	High	21.17	21.41	6.507	46.478	0.9056	High
ULK1c	1583	1599	YRVKAVSWNKKVPGASM	21.29	4	14	21.33	21.86	6.65	47.499	0.8038	High	21.27	21.83	6.758	48.271	0.873	High	21.22	21.75	6.721	48.006	0.8987	High
ULK1c	1583	1606	YRVKAVSWNKKVPGASMKIEEGKL	23.64	3	21	23.48	23.9	9.079	43.232	0.8015	High	23.58	23.74	9.111	43.385	0.8572	High	23.44	23.75	9.031	43.005	0.8384	High
							6s	ULK1c+NDP52					6s	ULK1c+NDP52					6s	ULK1c+NDP52											60s	ULK1c+NDP52												60s	ULK1c+NDP52
State	Start	End	Sequence	Search RT	Charge	Max D	Start RT	End RT	#D	%D	Score	Conf	Start RT	End RT	#D	%D	Score	Conf	Start RT	End RT	#D	%D	Score	Conf	Start	End	Sequence	Search RT	Charge	Max D	Start RT	End RT	#D	%D	Score	Conf		Start	End	Sequence	Search RT	Charge	Max D	Start RT	End RT	#D	%D	Score	Conf
ULK1c+NDP52	7	16	LVNTGTTLTF	23.29	2	8	23.31	23.71	1.998	24.974	0.8829	High	23.41	23.7	2.088	26.097	0.8771	High	23.21	23.63	2.037	25.46	0.8979	High	7	16	LVNTGTTLTF	26.26	2	8	25.67	26.11	2.041	25.517	0.8849	High		7	16	LVNTGTTLTF	26.26	2	8	26.1	26.14	2.602	32.531	0.8532	High
ULK1c+NDP52	20	45	LTVQTVADLKHAIQSKYKIAIQHQVL	28.47	2	24	28.36	28.66	3.255	13.563	0.9005	High	28.33	28.41	3.394	14.142	0.8194	High	28.17	28.59	3.231	13.463	0.7817	High	20	45	LTVQTVADLKHAIQSKYKIAIQHQVL	32.69	3	24	32.26	32.64	6.357	26.486	0.941	High		20	45	LTVQTVADLKHAIQSKYKIAIQHQVL	32.69	3	24	32.45	32.96	6.408	26.702	0.9145	High
ULK1c+NDP52	20	45	LTVQTVADLKHAIQSKYKIAIQHQVL	28.47	3	24	28.27	28.73	3.171	13.214	0.9474	High	28.22	28.66	3.411	14.212	0.9467	High	28.24	28.59	3.193	13.302	0.9488	High	20	45	LTVQTVADLKHAIQSKYKIAIQHQVL	32.69	4	24	32.33	32.57	6.6	27.499	0.9382	High		20	45	LTVQTVADLKHAIQSKYKIAIQHQVL	32.69	4	24	32.69	32.91	6.56	27.334	0.9054	High
ULK1c+NDP52	20	45	LTVQTVADLKHAIQSKYKIAIQHQVL	28.47	4	24	28.31	28.74	3.178	13.242	0.9523	High	28.27	28.57	3.368	14.033	0.9504	High	28.21	28.59	3.244	13.517	0.9522	High	21	45	TVQTVADLKHAIQSKYKIAIQHQVL	31.24	2	23	30.66	31.04	5.197	22.595	0.9374	High		21	45	TVQTVADLKHAIQSKYKIAIQHQVL	31.24	2	23	31.05	31.48	5.226	22.723	0.7931	High
ULK1c+NDP52	20	45	LTVQTVADLKHAIQSKYKIAIQHQVL	28.47	5	24	28.37	28.61	3.234	13.476	0.9296	High	28.41	28.78	3.348	13.95	0.8951	High	28.22	28.6	3.127	13.03	0.9012	High	21	45	TVQTVADLKHAIQSKYKIAIQHQVL	31.24	3	23	30.6	31.09	5.331	23.178	0.9467	High		21	45	TVQTVADLKHAIQSKYKIAIQHQVL	31.24	3	23	30.81	31.4	5.384	23.408	0.9135	High
ULK1c+NDP52	21	45	TVQTVADLKHAIQSKYKIAIQHQVL	28.73	2	23	27.09	27.36	2.136	9.287	0.9225	High	27	27.35	2.217	9.639	0.9199	High	26.87	27.39	2.062	8.965	0.9225	High	21	45	TVQTVADLKHAIQSKYKIAIQHQVL	31.24	4	23	30.69	31.14	5.527	24.03	0.9441	High		21	45	TVQTVADLKHAIQSKYKIAIQHQVL	31.24	4	23	31.27	31.47	5.364	23.323	0.8486	High
ULK1c+NDP52	21	45	TVQTVADLKHAIQSKYKIAIQHQVL	28.73	3	23	27.04	27.42	2.094	9.106	0.9519	High	27.11	27.39	2.273	9.883	0.952	High	26.91	27.35	2.141	9.31	0.9553	High	54	73	AADRRVCTYSAGTDTNPIFL	29.16	2	17	27.69	28.29	7.119	41.879	0.9066	High		54	73	AADRRVCTYSAGTDTNPIFL	29.16	2	17	28.16	28.83	7.379	43.408	0.8908	High
ULK1c+NDP52	21	45	TVQTVADLKHAIQSKYKIAIQHQVL	28.73	4	23	26.99	27.51	2.121	9.22	0.9533	High	27.07	27.33	2.312	10.051	0.9513	High	26.8	27.69	2.142	9.314	0.9549	High	62	72	YSAGTDTNPIF	24.87	2	8	23.93	24.24	1.732	21.65	0.8911	High		62	72	YSAGTDTNPIF	24.87	2	8	24.28	24.61	2.335	29.183	0.7641	High
ULK1c+NDP52	21	45	TVQTVADLKHAIQSKYKIAIQHQVL	28.73	5	23	27.01	27.51	2.085	9.065	0.9372	High	26.94	27.22	2.294	9.974	0.8973	High	26.84	27.41	2.099	9.127	0.9389	High	62	73	YSAGTDTNPIFL	28.11	2	9	27.32	27.8	1.925	21.39	0.9108	High		62	73	YSAGTDTNPIFL	28.11	2	9	27.76	28.08	2.602	28.913	0.8776	High
ULK1c+NDP52	28	45	LKHAIQSKYKIAIQHQVL	22.02	3	16	21.95	22.32	1.703	10.642	0.8021	High	21.78	22.12	1.685	10.532	0.6918	High	21.69	22.27	1.718	10.738	0.8491	High	73	77	LFNKE	14.75	2	3	13.96	14.03	0.034	1.13	0.8452	High		73	77	LFNKE	14.75	2	3	14.49	15	0.026	0.854	0.8604	High
ULK1c+NDP52	62	72	YSAGTDTNPIF	22.16	2	8	22.12	22.45	1.97	24.623	0.8338	High	22.16	22.3	2.108	26.355	0.8482	High	21.96	22.42	1.967	24.587	0.7257	High	74	80	FNKEMIL	26.11	2	5	25.03	25.41	2.151	43.012	0.8542	High		74	80	FNKEMIL	26.11	2	5	25.46	26.03	2.097	41.95	0.8282	High
ULK1c+NDP52	62	73	YSAGTDTNPIFL	25.56	2	9	25.21	25.63	2.126	23.621	0.9222	High	25.07	25.63	2.241	24.899	0.9089	High	25.05	25.56	2.12	23.551	0.9288	High	81	92	CDRPPAIPKTTF	23.38	2	7	22.53	22.69	4.215	60.208	0.8892	High		81	92	CDRPPAIPKTTF	23.38	2	7	23	23.44	4.155	59.363	0.7986	High
ULK1c+NDP52	73	77	LFNKE	14.05	2	3	14.43	14.58	0.01	0.324	0.4903	High	13.99	14.12	0.025	0.82	0.8192	High	14.19	14.56	0.034	1.126	0.8444	High	81	92	CDRPPAIPKTTF	23.38	3	7	22.51	22.69	4.21	60.14	0.9088	High		81	92	CDRPPAIPKTTF	23.38	3	7	23.14	23.38	4.176	59.663	0.7609	High
ULK1c+NDP52	73	80	LFNKEMIL	25.78	2	6	25.67	26.16	1.89	31.504	0.8377	High	25.57	26.02	1.955	32.578	0.7994	High	25.55	25.95	1.884	31.399	0.824	High	81	99	CDRPPAIPKTTFSTENDME	23.82	2	14	23.03	23.38	7.706	55.044	0.8585	High		81	99	CDRPPAIPKTTFSTENDME	23.82	2	14	23.57	23.68	7.557	53.978	0.7492	High
ULK1c+NDP52	74	80	FNKEMIL	22.97	2	5	22.92	23.33	1.755	35.1	0.8266	High	23.11	23.22	1.838	36.759	0.8427	High	22.84	23.15	1.803	36.064	0.8193	High	81	99	CDRPPAIPKTTFSTENDME	23.82	3	14	23.04	23.36	7.785	55.608	0.8895	High		81	99	CDRPPAIPKTTFSTENDME	23.82	3	14	23.45	23.72	7.441	53.149	0.8106	High
ULK1c+NDP52	81	92	CDRPPAIPKTTF	20.66	2	7	20.84	21.25	4.571	65.298	0.8883	High	20.77	21.18	4.515	64.506	0.8968	High	20.77	21.22	4.503	64.325	0.8871	High	82	92	DRPPAIPKTTF	22.58	2	6	21.91	22.28	3.777	62.957	0.9154	High		82	92	DRPPAIPKTTF	22.58	2	6	22.51	22.68	3.727	62.109	0.8383	High
ULK1c+NDP52	81	92	CDRPPAIPKTTF	20.66	3	7	20.68	21.07	4.708	67.259	0.8152	High	20.58	20.95	4.571	65.306	0.8695	High	20.56	20.97	4.575	65.364	0.8416	High	106	121	LMMPAVFHTVASRTQL	32.55	2	13	31.82	32.16	7.396	56.889	0.872	High		106	121	LMMPAVFHTVASRTQL	32.55	2	13	32.21	32.44	7.503	57.717	0.7311	High
ULK1c+NDP52	81	97	CDRPPAIPKTTFSTEND	19.85	3	12	19.67	19.92	7.295	60.788	0.811	High	19.64	19.93	7.141	59.509	0.8619	High	19.56	19.78	7.451	62.09	0.577	High	109	121	PAVFHTVASRTQL	24.06	3	11	23.28	23.61	6.142	55.834	0.8676	High		109	121	PAVFHTVASRTQL	24.06	3	11	23.73	23.9	6.291	57.194	0.7916	High
ULK1c+NDP52	81	99	CDRPPAIPKTTFSTENDME	21.24	3	14	21.1	21.35	8.686	62.043	0.829	High	20.97	21.42	8.404	60.029	0.8273	High	20.96	21.45	8.304	59.314	0.8341	High	113	121	HTVASRTQL	15.82	2	7	14.65	14.96	3.846	54.942	0.8748	High		113	121	HTVASRTQL	15.82	2	7	15.17	15.65	3.744	53.484	0.8944	High
ULK1c+NDP52	82	92	DRPPAIPKTTF	20.17	2	6	20.2	20.52	4.096	68.271	0.9161	High	20.14	20.43	4.035	67.242	0.9065	High	20.07	20.44	4.079	67.987	0.9064	High	125	135	MYEVAKKLCSF	29.27	2	9	28.65	28.98	1.16	12.887	0.9235	High		125	135	MYEVAKKLCSF	29.27	2	9	29.07	29.52	1.015	11.283	0.8629	High
ULK1c+NDP52	100	105	IKVEES	11.46	2	4	11.35	11.59	0.139	3.484	0.8376	High	11.35	11.55	0.203	5.072	0.8303	High	11.9	12.09	0.13	3.262	0.886	High	126	135	YEVAKKLCSF	26	2	8	25.39	25.77	1.058	13.222	0.9362	High		126	135	YEVAKKLCSF	26	2	8	25.8	26.38	1.01	12.62	0.898	High
ULK1c+NDP52	113	121	HTVASRTQL	15.11	2	7	14.5	15.09	2.355	33.641	0.9092	High	14.31	15.01	2.433	34.76	0.9135	High	14.55	15.08	2.42	34.576	0.9206	High	135	150	FCEGLVHDEHLQHQGW	27.91	3	14	26.71	27	0.703	5.025	0.8667	High		135	150	FCEGLVHDEHLQHQGW	27.91	3	14	27.12	27.48	0.667	4.762	0.6843	High
ULK1c+NDP52	113	122	HTVASRTQLA	13.22	2	8	13.23	13.38	2.443	30.532	0.8935	High	13.05	13.49	2.44	30.496	0.8786	High	13.42	13.85	2.453	30.658	0.8835	High	136	150	CEGLVHDEHLQHQGW	25.09	2	13	24.2	24.57	0.685	5.268	0.9522	High		136	150	CEGLVHDEHLQHQGW	25.09	2	13	24.58	25.26	0.731	5.623	0.945	High
ULK1c+NDP52	125	135	MYEVAKKLCSF	25.71	2	9	25.79	26.02	0.226	2.512	0.8995	High	25.62	25.94	0.249	2.771	0.9047	High	25.69	25.86	0.215	2.386	0.9014	High	136	150	CEGLVHDEHLQHQGW	25.09	3	13	24.18	24.59	0.559	4.303	0.9415	High		136	150	CEGLVHDEHLQHQGW	25.09	3	13	24.65	25.22	0.583	4.483	0.925	High
ULK1c+NDP52	126	135	YEVAKKLCSF	23.18	2	8	23.05	23.27	0.232	2.894	0.9158	High	22.89	23.31	0.248	3.095	0.9263	High	22.91	23.23	0.23	2.878	0.9164	High	136	154	CEGLVHDEHLQHQGWAAIM	29.9	2	17	29.14	29.46	0.946	5.563	0.8817	High		136	154	CEGLVHDEHLQHQGWAAIM	29.9	2	17	29.61	30.01	0.819	4.82	0.8352	High
ULK1c+NDP52	126	135	YEVAKKLCSF	23.18	3	8	23.05	23.36	0.152	1.905	0.814	High	22.93	23.22	0.165	2.063	0.8258	High	22.94	23.18	0.155	1.935	0.7843	High	139	150	LVHDEHLQHQGW	22.39	2	10	21.92	22.12	0.542	5.425	0.7316	High		139	150	LVHDEHLQHQGW	22.39	2	10	22.29	22.47	0.558	5.584	0.7295	High
ULK1c+NDP52	135	150	FCEGLVHDEHLQHQGW	24.24	3	14	24.12	24.55	0.2	1.429	0.8304	High	24.17	24.43	0.182	1.301	0.8333	High	24.08	24.37	0.241	1.718	0.8223	High	158	169	EDCSNSYQKLLF	29.43	2	10	28.72	28.96	1.286	12.859	0.9231	High		158	169	EDCSNSYQKLLF	29.43	2	10	29.19	29.55	1.336	13.364	0.9065	High
ULK1c+NDP52	136	150	CEGLVHDEHLQHQGW	21.96	2	13	22.08	22.38	0.342	2.629	0.9418	High	21.93	22.59	0.408	3.136	0.928	High	21.97	22.21	0.31	2.387	0.9432	High	164	169	YQKLLF	27.97	2	4	27.08	27.34	0.147	3.679	0.8727	High		164	169	YQKLLF	27.97	2	4	28.01	28.04	0.163	4.083	0.8464	High
ULK1c+NDP52	136	150	CEGLVHDEHLQHQGW	21.96	3	13	22.12	22.42	0.29	2.227	0.9236	High	21.92	22.34	0.356	2.741	0.9429	High	21.89	22.38	0.287	2.206	0.9357	High	168	178	LFKFESIYSNY	31.36	2	9	30.81	31.06	1.214	13.489	0.9083	High		168	178	LFKFESIYSNY	31.36	2	9	31.1	31.67	1.139	12.657	0.8837	High
ULK1c+NDP52	139	150	LVHDEHLQHQGW	19.97	3	10	19.92	20.36	0.144	1.44	0.882	High	19.78	20.18	0.22	2.201	0.9016	High	19.78	20.19	0.211	2.109	0.8933	High	170	178	KFESIYSNY	24.68	2	7	23.61	24.01	1.195	17.067	0.9086	High		170	178	KFESIYSNY	24.68	2	7	24.2	24.73	1.196	17.092	0.9184	High
ULK1c+NDP52	158	167	EDCSNSYQKL	16.97	2	8	16.93	17.4	0.867	10.833	0.7293	High	16.74	17.42	0.742	9.278	0.7274	High	16.82	17.59	0.792	9.901	0.7028	High	185	194	IKLKLTHLGT	23.81	2	8	23.04	23.4	1.669	20.864	0.9024	High		185	194	IKLKLTHLGT	23.81	2	8	23.49	23.71	1.813	22.662	0.8657	High
ULK1c+NDP52	158	169	EDCSNSYQKLLF	26	2	10	26.06	26.62	0.813	8.129	0.7126	High	26.04	26.41	0.904	9.045	0.729	High	26.05	26.35	0.729	7.293	0.7681	High	185	199	IKLKLTHLGTAVSVM	28.77	2	13	28.31	28.61	3.139	24.145	0.8947	High		185	199	IKLKLTHLGTAVSVM	28.77	2	13	28.15	28.39	3.285	25.267	0.7433	High
ULK1c+NDP52	164	169	YQKLLF	24.82	2	4	24.91	24.94	0.022	0.546	0.8588	High	24.73	24.76	0.032	0.789	0.8461	High	24.72	24.82	0.023	0.577	0.8684	High	188	194	KLTHLGT	15.46	2	5	14.7	14.77	1.347	26.931	0.7058	High		188	194	KLTHLGT	15.46	2	5	15.23	15.62	1.504	30.083	0.8009	High
ULK1c+NDP52	168	174	LFKFESI	26.42	2	5	26.3	26.5	0.03	0.609	0.8145	High	26.35	26.51	0.038	0.762	0.8503	High	26.18	26.47	0.021	0.42	0.8198	High	199	207	MAKIPLLEC	30.44	2	6	29.77	30.08	1.098	18.3	0.8838	High		199	207	MAKIPLLEC	30.44	2	6	30.03	30.71	1.51	25.175	0.8871	High
ULK1c+NDP52	168	178	LFKFESIYSNY	27.58	2	9	27.49	27.93	0.233	2.588	0.9116	High	27.38	27.83	0.321	3.565	0.9201	High	27.35	27.8	0.265	2.947	0.9077	High	200	207	AKIPLLEC	27.56	2	5	26.93	27.26	1.084	21.68	0.8923	High		200	207	AKIPLLEC	27.56	2	5	27.32	27.82	1.488	29.76	0.8838	High
ULK1c+NDP52	169	178	FKFESIYSNY	26.02	2	8	26.04	26.12	0.2	2.497	0.7954	High	25.95	26.07	0.139	1.735	0.8944	High	25.88	26.16	0.187	2.338	0.8421	High	208	217	LTRHSYRECL	21.77	3	8	20.84	21.25	3.678	45.969	0.8919	High		208	217	LTRHSYRECL	21.77	3	8	21.53	21.8	3.594	44.923	0.8908	High
ULK1c+NDP52	170	178	KFESIYSNY	21.86	2	7	21.83	22.3	0.185	2.649	0.9014	High	21.72	22.08	0.231	3.303	0.8988	High	21.7	22.14	0.255	3.645	0.9149	High	218	240	GRLDSLPEHEDSEKAEMKRSTEL	24.25	3	20	22.97	23.27	9.843	49.213	0.859	High		218	240	GRLDSLPEHEDSEKAEMKRSTEL	24.25	3	20	23.51	23.74	9.846	49.23	0.7448	High
ULK1c+NDP52	170	179	KFESIYSNYL	26.13	2	8	26.02	26.32	0.111	1.386	0.8169	High	25.9	26.29	0.347	4.343	0.821	High	25.91	26.21	0.154	1.928	0.8446	High	221	234	DSLPEHEDSEKAEM	18.19	2	11	17.59	18.02	4.798	43.615	0.9032	High		221	234	DSLPEHEDSEKAEM	18.19	2	11	18.06	18.58	4.63	42.093	0.846	High
ULK1c+NDP52	179	199	LQSIEDIKLKLTHLGTAVSVM	29.86	3	19	29.61	29.77	2.857	15.039	0.8919	High	29.51	29.76	2.847	14.984	0.8527	High	29.48	29.72	2.805	14.765	0.7356	High	221	239	DSLPEHEDSEKAEMKRSTE	18.4	3	16	17.51	17.99	8.118	50.736	0.9244	High		221	239	DSLPEHEDSEKAEMKRSTE	18.4	3	16	17.95	18.47	8.049	50.308	0.9182	High
ULK1c+NDP52	184	194	DIKLKLTHLGT	21.98	2	9	21.92	22.11	0.981	10.903	0.887	High	21.84	22.08	0.934	10.381	0.8866	High	21.69	22.11	1.014	11.262	0.8011	High	221	240	DSLPEHEDSEKAEMKRSTEL	22.51	3	17	21.27	21.5	8.724	51.318	0.8752	High		221	240	DSLPEHEDSEKAEMKRSTEL	22.51	3	17	21.77	22.12	8.319	48.933	0.7877	High
ULK1c+NDP52	184	199	DIKLKLTHLGTAVSVM	25.84	2	14	25.8	26.07	1.533	10.952	0.7744	High	25.82	25.91	1.597	11.408	0.8502	High	25.77	25.97	1.636	11.684	0.8581	High	240	252	LVLSPDMPRTTNE	22.6	2	9	22.14	22.53	5.344	59.379	0.9283	High		240	252	LVLSPDMPRTTNE	22.6	2	9	22.39	22.88	5.471	60.784	0.8908	High
ULK1c+NDP52	185	194	IKLKLTHLGT	21	2	8	20.93	21.23	0.964	12.051	0.8642	High	20.79	21.13	0.95	11.879	0.8718	High	20.78	21.13	0.904	11.305	0.9243	High	240	254	LVLSPDMPRTTNESL	25.98	2	11	25.31	25.69	6.219	56.533	0.8714	High		240	254	LVLSPDMPRTTNESL	25.98	2	11	25.62	26.02	6.461	58.739	0.904	High
ULK1c+NDP52	185	198	IKLKLTHLGTAVSV	23.7	2	12	23.7	23.89	1.401	11.675	0.9154	High	23.62	24	1.579	13.16	0.9325	High	23.58	24	1.532	12.765	0.9296	High	241	252	VLSPDMPRTTNE	18.95	2	8	18.34	18.76	4.815	60.193	0.915	High		241	252	VLSPDMPRTTNE	18.95	2	8	18.72	19.07	4.807	60.086	0.908	High
ULK1c+NDP52	185	198	IKLKLTHLGTAVSV	23.7	3	12	23.71	24.07	1.515	12.627	0.9144	High	23.62	23.95	1.503	12.526	0.9142	High	23.57	23.89	1.604	13.367	0.8588	High	255	263	LTSFPKSVE	20.47	2	6	19.86	20.07	4.103	68.39	0.8924	High		255	263	LTSFPKSVE	20.47	2	6	20.25	20.58	4.065	67.742	0.7519	High
ULK1c+NDP52	185	199	IKLKLTHLGTAVSVM	24.97	2	13	24.96	25.41	1.55	11.925	0.9436	High	24.89	25.39	1.696	13.045	0.9358	High	24.82	25.25	1.627	12.515	0.9297	High	255	277	LTSFPKSVEHVSPDTADAESGKE	22.13	3	19	21.41	21.73	10.251	53.95	0.8804	High		255	277	LTSFPKSVEHVSPDTADAESGKE	22.13	3	19	21.65	22.12	9.764	51.391	0.8657	High
ULK1c+NDP52	185	199	IKLKLTHLGTAVSVM	24.97	3	13	24.95	25.24	1.474	11.339	0.9327	High	24.87	25.21	1.617	12.439	0.908	High	24.84	25.22	1.577	12.127	0.9281	High	255	280	LTSFPKSVEHVSPDTADAESGKEIRE	23.29	3	22	22.55	22.78	12.033	54.696	0.8484	High		255	280	LTSFPKSVEHVSPDTADAESGKEIRE	23.29	3	22	22.88	23.13	11.999	54.543	0.8638	High
ULK1c+NDP52	188	194	KLTHLGT	14.42	2	5	14.57	14.69	0.759	15.176	0.884	High	14.26	14.59	0.777	15.535	0.8781	High	14.48	14.84	0.8	16.004	0.872	High	256	263	TSFPKSVE	17.85	2	5	17.05	17.18	3.375	67.498	0.5461	High		256	263	TSFPKSVE	17.85	2	5	17.66	17.71	3.37	67.402	0.8314	High
ULK1c+NDP52	199	207	MAKIPLLEC	27.09	2	6	26.75	27.11	1.227	20.457	0.829	High	26.7	26.95	1.22	20.328	0.8662	High	26.66	26.95	1.224	20.407	0.8515	High	256	277	TSFPKSVEHVSPDTADAESGKE	20.63	2	18	20.04	20.38	9.625	53.472	0.8864	High		256	277	TSFPKSVEHVSPDTADAESGKE	20.63	2	18	20.42	20.66	9.829	54.608	0.8772	High
ULK1c+NDP52	200	207	AKIPLLEC	24.45	2	5	24.42	24.96	1.274	25.482	0.87	High	24.41	24.65	1.297	25.933	0.8958	High	24.33	24.82	1.303	26.065	0.8751	High	256	277	TSFPKSVEHVSPDTADAESGKE	20.63	3	18	20.23	20.47	9.613	53.405	0.912	High		256	277	TSFPKSVEHVSPDTADAESGKE	20.63	3	18	20.46	20.6	9.73	54.056	0.9259	High
ULK1c+NDP52	208	217	LTRHSYRECL	19.18	3	8	19.21	19.61	3.898	48.729	0.8897	High	19.11	19.26	3.833	47.91	0.8796	High	19.13	19.25	3.916	48.954	0.9179	High	256	280	TSFPKSVEHVSPDTADAESGKEIRE	22.2	3	21	21.39	21.72	11.43	54.428	0.8543	High		256	280	TSFPKSVEHVSPDTADAESGKEIRE	22.2	3	21	21.73	22.05	11.629	55.374	0.8523	High
ULK1c+NDP52	218	239	GRLDSLPEHEDSEKAEMKRSTE	18.69	3	19	18.63	18.8	9.988	52.567	0.7759	High	18.54	18.73	9.792	51.534	0.755	High	18.49	18.68	9.991	52.587	0.8123	High	264	277	HVSPDTADAESGKE	12.43	2	11	11.73	12.05	6.309	57.352	0.809	High		264	277	HVSPDTADAESGKE	12.43	2	11	12.2	12.32	6.037	54.883	0.5131	High
ULK1c+NDP52	221	234	DSLPEHEDSEKAEM	16.79	2	11	16.78	17.08	5.367	48.794	0.8885	High	16.7	16.88	5.509	50.081	0.8468	High	16.66	16.91	5.395	49.049	0.8158	High	294	304	IDTKDGDLPFF	32.73	2	8	30.86	31.41	2.914	36.419	0.8769	High		278	293	IRESCQSTVHQQDETT	13.99	2	14	13.78	13.92	7.773	55.522	0.6863	High
ULK1c+NDP52	221	239	DSLPEHEDSEKAEMKRSTE	16.67	3	16	16.54	16.79	8.998	56.237	0.796	High	16.47	16.67	8.658	54.11	0.7117	High	16.47	16.7	8.696	54.349	0.6103	High	309	324	LDWINVQDRPNDVESL	30.53	2	13	29.54	29.93	4.429	34.072	0.9229	High		294	304	IDTKDGDLPFF	32.73	2	8	31.41	32.01	3.225	40.307	0.9002	High
ULK1c+NDP52	221	240	DSLPEHEDSEKAEMKRSTEL	19.93	3	17	19.63	19.94	9.438	55.517	0.908	High	19.51	19.74	9.384	55.197	0.855	High	19.48	19.7	9.397	55.277	0.8997	High	311	324	WINVQDRPNDVESL	27.06	2	11	26.31	26.5	4.954	45.04	0.8088	High		309	324	LDWINVQDRPNDVESL	30.53	2	13	30.16	30.42	4.958	38.141	0.9134	High
ULK1c+NDP52	240	252	LVLSPDMPRTTNE	20.18	2	9	20.37	20.65	6.116	67.96	0.9153	High	20.35	20.53	5.965	66.28	0.9291	High	20.21	20.38	5.972	66.356	0.9045	High	315	324	QDRPNDVESL	19.3	2	7	18.72	18.82	3.753	53.617	0.8168	High		311	324	WINVQDRPNDVESL	27.06	2	11	26.67	26.87	5.036	45.779	0.6679	High
ULK1c+NDP52	240	254	LVLSPDMPRTTNESL	23.16	2	11	23	23.25	7.232	65.75	0.8788	High	22.91	23.23	7.185	65.319	0.8822	High	22.85	23.14	7.302	66.385	0.8842	High	325	346	VRKCFDSMSRLDPRIIRPFIAE	31.29	3	18	30.5	30.78	3.7	20.554	0.7937	High		315	324	QDRPNDVESL	19.3	2	7	19.09	19.42	3.77	53.855	0.8531	High
ULK1c+NDP52	241	252	VLSPDMPRTTNE	17.25	2	8	17.4	17.71	5.37	67.127	0.9009	High	17.24	17.54	5.304	66.303	0.8952	High	17.22	17.58	5.334	66.677	0.8769	High	348	369	RQTIAKLDNQNMKAIKGLEDRL	30.71	3	20	29.89	30.27	11.441	57.205	0.9279	High		325	346	VRKCFDSMSRLDPRIIRPFIAE	31.29	3	18	30.79	31.37	4.372	24.288	0.8617	High
ULK1c+NDP52	241	254	VLSPDMPRTTNESL	20.6	2	10	20.58	20.88	6.656	66.557	0.9047	High	20.64	20.83	6.488	64.876	0.8917	High	20.61	20.83	6.57	65.696	0.8506	High	376	382	IASCGRL	18.11	2	5	17.6	17.81	2.183	43.669	0.7706	High		348	369	RQTIAKLDNQNMKAIKGLEDRL	30.71	3	20	30.32	30.64	11.927	59.633	0.899	High
ULK1c+NDP52	255	277	LTSFPKSVEHVSPDTADAESGKE	19.71	3	19	19.68	19.92	11.522	60.645	0.8478	High	19.56	19.85	11.159	58.733	0.8381	High	19.55	19.87	11.267	59.3	0.8611	High	383	393	VNEQKELAQGF	23.17	2	9	22.26	22.62	0.685	7.615	0.8388	High		376	382	IASCGRL	18.11	2	5	18.04	18.1	2.198	43.958	0.7729	High
ULK1c+NDP52	256	277	TSFPKSVEHVSPDTADAESGKE	18.58	2	18	18.6	18.76	10.671	59.285	0.8732	High	18.45	18.64	10.646	59.143	0.9115	High	18.28	18.75	10.675	59.303	0.8788	High	383	405	VNEQKELAQGFLANQKRAENLKD	26.56	3	21	25.62	25.85	9.56	45.522	0.8246	High		383	393	VNEQKELAQGF	23.17	2	9	23.01	23.1	0.719	7.984	0.737	High
ULK1c+NDP52	256	277	TSFPKSVEHVSPDTADAESGKE	18.58	3	18	18.52	18.82	10.726	59.59	0.902	High	18.41	18.84	10.455	58.085	0.9252	High	18.4	18.76	10.68	59.334	0.9199	High	414	421	LSHANQLM	18.68	2	6	17.84	18.04	2.565	42.748	0.7513	High		383	394	VNEQKELAQGFL	27.4	2	10	27.26	27.41	1.758	17.58	0.7471	High
ULK1c+NDP52	256	280	TSFPKSVEHVSPDTADAESGKEIRE	19.74	3	21	19.71	19.75	12.415	59.12	0.779	High	19.52	19.7	12.673	60.349	0.7452	High	19.69	19.75	12.577	59.889	0.7552	High	422	432	IMLQNHRKLLD	22.71	2	9	21.95	22.22	0.083	0.927	0.8923	High		383	405	VNEQKELAQGFLANQKRAENLKD	26.56	3	21	25.94	26.37	9.846	46.886	0.8121	High
ULK1c+NDP52	264	277	HVSPDTADAESGKE	12.02	2	11	12.09	12.49	6.669	60.628	0.8434	High	11.81	12.01	6.484	58.942	0.8349	High	12.36	12.61	6.548	59.531	0.8263	High	422	448	IMLQNHRKLLDIKQKCTTAKQELANNL	29.4	3	25	28.63	28.92	4.607	18.428	0.9328	High		414	421	LSHANQLM	18.68	2	6	18.48	18.63	2.556	42.601	0.7881	High
ULK1c+NDP52	278	293	IRESCQSTVHQQDETT	13.51	2	14	13.55	13.79	8.743	62.449	0.7815	High	13.38	13.45	8.846	63.182	0.7156	High	13.74	13.91	8.601	61.433	0.7746	High	424	448	LQNHRKLLDIKQKCTTAKQELANNL	27.98	3	23	27.34	27.67	4.659	20.258	0.9255	High		422	432	IMLQNHRKLLD	22.71	2	9	22.26	22.28	0.129	1.432	0.7666	High
ULK1c+NDP52	281	293	SCQSTVHQQDETT	11.35	2	11	10.79	11.33	7.032	63.931	0.9183	High	10.65	10.86	6.868	62.439	0.9037	High	11.25	11.8	6.893	62.664	0.916	High	433	448	IKQKCTTAKQELANNL	22.24	2	14	21.57	21.85	4.333	30.953	0.8466	High		422	448	IMLQNHRKLLDIKQKCTTAKQELANNL	29.4	3	25	28.75	29.2	4.67	18.682	0.9116	High
ULK1c+NDP52	294	304	IDTKDGDLPFF	27.76	2	8	27.98	28.09	3.866	48.319	0.9089	High	27.74	28.17	3.731	46.636	0.9143	High	27.75	28.05	3.758	46.981	0.9189	High	433	448	IKQKCTTAKQELANNL	22.24	3	14	21.68	21.95	4.321	30.864	0.9206	High		424	448	LQNHRKLLDIKQKCTTAKQELANNL	27.98	3	23	27.75	27.93	4.697	20.421	0.6729	High
ULK1c+NDP52	294	308	IDTKDGDLPFFNVSL	30.84	2	12	30.91	31.11	6.547	54.557	0.6989	High	30.86	31.07	6.488	54.067	0.703	High	30.93	31.03	6.389	53.243	0.6903	High	449	457	HVRLKWCCF	32.06	2	7	31.32	31.73	0.922	13.172	0.8809	High		433	448	IKQKCTTAKQELANNL	22.24	2	14	22.03	22.28	4.536	32.397	0.8842	High
ULK1c+NDP52	309	324	LDWINVQDRPNDVESL	26.43	2	13	26.37	26.85	3.707	28.519	0.8977	High	26.34	26.74	3.759	28.913	0.8977	High	26.31	26.76	3.653	28.097	0.8933	High	457	469	FVMLHADQDGEKL	25.73	2	11	25.1	25.39	2.076	18.872	0.9287	High		433	448	IKQKCTTAKQELANNL	22.24	3	14	22.15	22.2	4.598	32.843	0.7324	High
ULK1c+NDP52	311	324	WINVQDRPNDVESL	24.26	2	11	23.95	24.13	3.913	35.571	0.8311	High	23.85	24.02	3.806	34.602	0.809	High	23.87	23.97	3.842	34.927	0.7641	High	457	472	FVMLHADQDGEKLQAL	28.14	2	14	27.45	27.66	1.985	14.175	0.8999	High		449	457	HVRLKWCCF	32.06	2	7	32	32.33	0.809	11.551	0.9109	High
ULK1c+NDP52	314	324	VQDRPNDVESL	18.25	2	8	18.21	18.45	3.353	41.916	0.851	High	18.19	18.43	3.452	43.156	0.8914	High	18.07	18.39	3.355	41.935	0.9018	High	457	472	FVMLHADQDGEKLQAL	28.14	3	14	27.36	27.75	1.923	13.735	0.9312	High		457	469	FVMLHADQDGEKL	25.73	2	11	25.53	25.8	2	18.18	0.8295	High
ULK1c+NDP52	325	332	VRKCFDSM	18.57	2	6	18.85	19.11	0.258	4.295	0.8692	High	18.71	19.04	0.259	4.32	0.8684	High	18.7	19	0.243	4.052	0.8779	High	458	472	VMLHADQDGEKLQAL	24.71	2	13	23.89	24.26	1.946	14.97	0.9324	High		457	472	FVMLHADQDGEKLQAL	28.14	2	14	27.86	28.04	2.001	14.291	0.8596	High
ULK1c+NDP52	325	346	VRKCFDSMSRLDPRIIRPFIAE	27.06	3	18	27.02	27.3	1.547	8.595	0.9172	High	26.93	27.27	1.634	9.08	0.914	High	26.89	27.1	1.598	8.876	0.9078	High	458	472	VMLHADQDGEKLQAL	24.71	3	13	23.95	24.19	1.952	15.018	0.9254	High		457	472	FVMLHADQDGEKLQAL	28.14	3	14	27.83	28.13	2.088	14.913	0.8677	High
ULK1c+NDP52	325	347	VRKCFDSMSRLDPRIIRPFIAEC	28.55	3	19	28.35	28.71	1.512	7.959	0.924	High	28.4	28.63	1.544	8.128	0.9086	High	28.32	28.63	1.57	8.265	0.9184	High	461	472	HADQDGEKLQAL	20.16	2	10	19.61	19.84	1.109	11.087	0.9277	High		458	472	VMLHADQDGEKLQAL	24.71	2	13	24.28	24.58	2.05	15.77	0.888	High
ULK1c+NDP52	333	347	SRLDPRIIRPFIAEC	26.4	3	11	26.36	26.48	0.775	7.048	0.9026	High	26.23	26.57	0.827	7.519	0.9162	High	26.24	26.52	0.804	7.308	0.9202	High	480	489	LERVKIVEAL	25.94	2	8	25.36	25.8	2.435	30.435	0.8633	High		458	472	VMLHADQDGEKLQAL	24.71	3	13	24.38	24.41	1.857	14.284	0.7535	High
ULK1c+NDP52	347	369	CRQTIAKLDNQNMKAIKGLEDRL	27.38	3	21	27.01	27.26	10.129	48.234	0.9277	High	26.93	27.27	10.117	48.175	0.9257	High	26.94	27.11	10.17	48.427	0.9251	High	480	495	LERVKIVEALSTVPQM	30.52	3	13	29.96	30.29	4.237	32.594	0.9043	High		461	472	HADQDGEKLQAL	20.16	2	10	20.1	20.45	1.237	12.374	0.9288	High
ULK1c+NDP52	347	369	CRQTIAKLDNQNMKAIKGLEDRL	27.38	4	21	26.98	27.42	10.123	48.206	0.8918	High	26.89	27.28	10.306	49.079	0.8799	High	26.9	27.34	10.049	47.851	0.8829	High	500	520	VVEVVRRKMFIKHYREWAGAL	30.16	3	19	29.71	29.92	1.092	5.749	0.9478	High		480	489	LERVKIVEAL	25.94	2	8	25.87	26.03	2.214	27.675	0.9018	High
ULK1c+NDP52	347	369	CRQTIAKLDNQNMKAIKGLEDRL	27.38	5	21	27.02	27.27	10.59	50.427	0.8127	High	26.88	27.15	10.44	49.713	0.8739	High	26.9	27.15	10.559	50.28	0.8642	High	503	515	VVRRKMFIKHYRE	20.55	3	11	20.08	20.33	0.518	4.709	0.9384	High		480	495	LERVKIVEALSTVPQM	30.52	3	13	30.15	30.49	4.057	31.21	0.8666	High
ULK1c+NDP52	348	369	RQTIAKLDNQNMKAIKGLEDRL	26.86	2	20	26.64	26.71	10.186	50.931	0.6141	High	26.56	26.67	10.348	51.742	0.7632	High	26.52	26.7	10.052	50.26	0.809	High	503	520	VVRRKMFIKHYREWAGAL	28.56	3	16	27.97	28.34	0.956	5.973	0.949	High		500	520	VVEVVRRKMFIKHYREWAGAL	30.16	3	19	29.91	30.47	1.124	5.917	0.8367	High
ULK1c+NDP52	348	369	RQTIAKLDNQNMKAIKGLEDRL	26.86	3	20	26.49	26.76	10.149	50.744	0.896	High	26.46	26.62	10.313	51.564	0.902	High	26.39	26.58	10.404	52.019	0.8939	High	521	538	VKDGKRLYEAEKSKRESF	21.51	3	16	20.68	20.95	2.172	13.577	0.8767	High		503	515	VVRRKMFIKHYRE	20.55	3	11	20.45	20.72	0.583	5.303	0.8993	High
ULK1c+NDP52	348	369	RQTIAKLDNQNMKAIKGLEDRL	26.86	5	20	26.56	26.84	10.548	52.74	0.8149	High	26.54	26.7	10.282	51.412	0.827	High	26.5	26.74	10.405	52.026	0.8182	High	521	541	VKDGKRLYEAEKSKRESFGKL	23.73	3	19	23	23.42	3.489	18.365	0.8685	High		503	520	VVRRKMFIKHYREWAGAL	28.56	3	16	28.4	28.64	1.186	7.411	0.9196	High
ULK1c+NDP52	362	369	IKGLEDRL	20.51	2	6	20.64	20.82	3.139	52.309	0.8265	High	20.6	20.77	3.122	52.026	0.8042	High	20.56	20.72	3.107	51.78	0.8219	High	521	541	VKDGKRLYEAEKSKRESFGKL	23.73	4	19	22.97	23.38	3.528	18.571	0.8608	High		521	538	VKDGKRLYEAEKSKRESF	21.51	3	16	21.13	21.33	3.209	20.058	0.808	High
ULK1c+NDP52	376	405	IASCGRLVNEQKELAQGFLANQKRAENLKD	26.95	3	28	26.72	27.09	10.161	36.289	0.8314	High	26.69	27.01	10.211	36.469	0.8915	High	26.61	26.99	9.944	35.515	0.8753	High	528	541	YEAEKSKRESFGKL	21.99	3	12	21.03	21.21	2.853	23.773	0.8605	High		521	541	VKDGKRLYEAEKSKRESFGKL	23.73	3	19	23.51	23.97	5.374	28.287	0.8762	High
ULK1c+NDP52	376	409	IASCGRLVNEQKELAQGFLANQKRAENLKDASVL	28.42	4	32	28.22	28.53	13.087	40.896	0.8724	High	28.07	28.36	12.892	40.287	0.9094	High	28.07	28.25	12.905	40.328	0.8922	High	552	562	FRGLDSWPPSF	34.48	2	7	33.45	33.96	3.053	43.614	0.9161	High		521	541	VKDGKRLYEAEKSKRESFGKL	23.73	4	19	23.46	23.85	5.398	28.411	0.8762	High
ULK1c+NDP52	383	393	VNEQKELAQGF	20.67	2	9	20.67	20.96	0.184	2.045	0.8623	High	20.54	20.84	0.185	2.052	0.8352	High	20.52	20.84	0.141	1.568	0.8376	High	563	574	CTQKPRKFDCEL	23.94	2	9	23.08	23.55	4.087	45.408	0.7946	High		528	541	YEAEKSKRESFGKL	21.99	3	12	21.6	21.74	3.714	30.947	0.8266	High
ULK1c+NDP52	383	405	VNEQKELAQGFLANQKRAENLKD	23.33	3	21	23.25	23.55	8.864	42.208	0.8499	High	23.18	23.5	9.007	42.888	0.8198	High	23.1	23.36	8.795	41.879	0.8243	High	575	581	PDISLKD	18.87	2	5	18.3	18.79	2.673	53.457	0.4948	High		552	562	FRGLDSWPPSF	34.48	2	7	34.14	34.53	3.073	43.902	0.9152	High
ULK1c+NDP52	383	405	VNEQKELAQGFLANQKRAENLKD	23.33	4	21	23.16	23.29	9.027	42.987	0.8133	High	23.12	23.29	8.911	42.435	0.8557	High	22.99	23.18	9.091	43.289	0.7929	High	575	583	PDISLKDLQ	25.25	2	7	24.61	24.94	2.534	36.193	0.7122	High		563	574	CTQKPRKFDCEL	23.94	2	9	23.7	23.98	4.495	49.942	0.8626	High
ULK1c+NDP52	383	409	VNEQKELAQGFLANQKRAENLKDASVL	25.69	3	25	25.65	25.93	11.964	47.856	0.8737	High	25.55	25.83	11.91	47.639	0.873	High	25.51	25.85	11.878	47.512	0.873	High	575	584	PDISLKDLQF	31.79	2	8	31.25	31.41	2.832	35.397	0.9052	High		575	581	PDISLKD	18.87	2	5	18.68	18.93	2.707	54.133	0.8242	High
ULK1c+NDP52	383	409	VNEQKELAQGFLANQKRAENLKDASVL	25.69	4	25	25.67	25.88	12.207	48.827	0.8238	High	25.56	25.76	12.073	48.291	0.8122	High	25.55	25.76	12.159	48.634	0.8304	High	580	584	KDLQF	21.74	2	3	20.89	21.21	0.195	6.498	0.8813	High		575	583	PDISLKDLQ	25.25	2	7	25.11	25.38	2.991	42.729	0.8245	High
ULK1c+NDP52	413	421	CLSHANQLM	18.26	2	7	18.39	18.85	2.58	36.853	0.8472	High	18.33	18.75	2.552	36.462	0.8646	High	18.3	18.65	2.603	37.191	0.8584	High	585	599	LQSFCPSEVQPFLRV	33.14	2	11	32.24	32.55	3.947	35.879	0.8745	High		575	584	PDISLKDLQF	31.79	2	8	31.71	31.97	3.402	42.523	0.8823	High
ULK1c+NDP52	422	432	IMLQNHRKLLD	20.07	2	9	20.08	20.35	0.114	1.269	0.918	High	19.95	20.23	0.119	1.318	0.9174	High	19.88	20.31	0.102	1.134	0.9103	High	585	602	LQSFCPSEVQPFLRVPLL	38.06	2	13	36.88	37.26	5.275	40.58	0.8771	High		580	584	KDLQF	21.74	2	3	21.45	21.88	0.635	21.176	0.873	High
ULK1c+NDP52	422	432	IMLQNHRKLLD	20.07	3	9	19.94	20.25	0.076	0.843	0.8105	High	20.01	20.17	0.076	0.85	0.8538	High	20.01	20.19	0.065	0.723	0.8365	High	588	602	FCPSEVQPFLRVPLL	36.91	2	10	36.19	36.29	4.421	44.211	0.6667	High		585	599	LQSFCPSEVQPFLRV	33.14	2	11	32.85	33.07	4.56	41.453	0.6604	High
ULK1c+NDP52	422	448	IMLQNHRKLLDIKQKCTTAKQELANNL	25.25	3	25	25.21	25.62	1.453	5.811	0.9531	High	25.19	25.56	1.645	6.578	0.951	High	25.17	25.5	1.508	6.031	0.9502	High	590	602	PSEVQPFLRVPLL	34.79	2	9	34.07	34.34	3.723	41.37	0.8934	High		585	602	LQSFCPSEVQPFLRVPLL	38.06	2	13	37.36	37.41	5.859	45.071	0.8839	High
ULK1c+NDP52	422	448	IMLQNHRKLLDIKQKCTTAKQELANNL	25.25	4	25	25.25	25.54	1.456	5.823	0.9557	High	25.15	25.54	1.685	6.739	0.9502	High	25.15	25.55	1.563	6.251	0.9536	High	603	615	CDFEPLHQHVLAL	30.35	2	10	29.68	29.79	4.164	41.644	0.8938	High		588	602	FCPSEVQPFLRVPLL	36.91	2	10	36.55	36.69	4.567	45.67	0.656	High
ULK1c+NDP52	422	456	IMLQNHRKLLDIKQKCTTAKQELANNLHVRLKWCC	29.13	4	33	29.07	29.61	1.846	5.593	0.9268	High	28.96	29.54	2.008	6.084	0.9189	High	28.91	29.52	1.904	5.77	0.9025	High	603	627	CDFEPLHQHVLALHNLVKAAQSLDE	35.84	3	22	34.75	35.04	10.203	46.375	0.792	High		590	602	PSEVQPFLRVPLL	34.79	2	9	34.53	34.64	4.118	45.757	0.7972	High
ULK1c+NDP52	422	456	IMLQNHRKLLDIKQKCTTAKQELANNLHVRLKWCC	29.13	6	33	29.09	29.55	1.799	5.453	0.9133	High	28.96	29.42	2.07	6.272	0.9146	High	29.02	29.4	1.83	5.545	0.8667	High	626	635	DEMSQTITDL	27.22	2	8	26.39	26.7	4.418	55.22	0.6097	High		603	615	CDFEPLHQHVLAL	30.35	2	10	30.31	30.49	3.585	35.853	0.8795	High
ULK1c+NDP52	424	448	LQNHRKLLDIKQKCTTAKQELANNL	24.29	3	23	24.25	24.76	1.398	6.079	0.9417	High	24.15	24.63	1.622	7.053	0.9471	High	24.14	24.61	1.524	6.625	0.9535	High	636	656	LSEQKASVSQTSPQSASSPRM	18.2	2	17	16.96	17.45	11.19	65.825	0.9182	High		603	627	CDFEPLHQHVLALHNLVKAAQSLDE	35.84	3	22	35.09	35.51	9.251	42.051	0.7837	High
ULK1c+NDP52	424	448	LQNHRKLLDIKQKCTTAKQELANNL	24.29	4	23	24.28	24.58	1.501	6.525	0.9039	High	24.14	24.6	1.707	7.42	0.9084	High	24.06	24.55	1.492	6.485	0.9182	High	636	656	LSEQKASVSQTSPQSASSPRM	18.2	3	17	17.05	17.4	11.201	65.886	0.9302	High		626	635	DEMSQTITDL	27.22	2	8	27.13	27.24	4.2	52.497	0.42	High
ULK1c+NDP52	433	448	IKQKCTTAKQELANNL	19.82	2	14	20.04	20.21	1.274	9.102	0.7348	High	19.87	20.13	1.442	10.302	0.8761	High	19.81	20.08	1.282	9.158	0.8805	High	686	701	PLEELSPDSIDAHTFD	28.27	2	13	27.46	27.73	5.865	45.114	0.5986	High		636	656	LSEQKASVSQTSPQSASSPRM	18.2	2	17	17.32	17.96	11.024	64.845	0.897	High
ULK1c+NDP52	433	448	IKQKCTTAKQELANNL	19.82	3	14	19.89	20.23	1.373	9.805	0.8725	High	19.72	20.17	1.649	11.775	0.8959	High	19.81	20.16	1.297	9.263	0.886	High	702	716	FETIPHPNIEQTIHQ	25.49	2	11	24.86	25.12	6.965	63.316	0.877	High		636	656	LSEQKASVSQTSPQSASSPRM	18.2	3	17	17.34	17.92	11.048	64.985	0.9187	High
ULK1c+NDP52	449	456	HVRLKWCC	22.95	2	6	22.9	23.39	0.05	0.825	0.8196	High	22.82	23.3	0.048	0.793	0.8233	High	22.79	23.22	0.063	1.052	0.8153	High	702	719	FETIPHPNIEQTIHQVSL	31.27	2	14	30.4	30.74	9.151	65.368	0.8737	High		686	701	PLEELSPDSIDAHTFD	28.27	2	13	28.02	28.26	5.808	44.675	0.7661	High
ULK1c+NDP52	449	457	HVRLKWCCF	27.81	2	7	27.74	28.3	0.08	1.14	0.8689	High	27.61	28.2	0.109	1.563	0.8677	High	27.59	28.12	0.123	1.753	0.8745	High	702	721	FETIPHPNIEQTIHQVSLDL	36.69	2	16	35.63	35.91	10.63	66.44	0.8751	High		702	716	FETIPHPNIEQTIHQ	25.49	2	11	25.2	25.46	7.152	65.019	0.8765	High
ULK1c+NDP52	457	469	FVMLHADQDGEKL	22.83	2	11	22.75	23.04	0.492	4.47	0.9315	High	22.6	23.04	0.49	4.459	0.9015	High	22.57	23.01	0.512	4.657	0.9345	High	702	721	FETIPHPNIEQTIHQVSLDL	36.69	3	16	35.6	35.95	10.659	66.617	0.8085	High		702	719	FETIPHPNIEQTIHQVSL	31.27	2	14	30.63	30.98	9.489	67.781	0.5853	High
ULK1c+NDP52	457	472	FVMLHADQDGEKLQAL	24.62	2	14	24.83	25.25	0.487	3.476	0.8598	High	24.76	25.19	0.52	3.714	0.8532	High	24.76	25.17	0.5	3.573	0.8374	High	703	716	ETIPHPNIEQTIHQ	23.32	2	10	22.66	22.78	6.205	62.054	0.831	High		702	721	FETIPHPNIEQTIHQVSLDL	36.69	2	16	35.92	36.21	10.664	66.648	0.8821	High
ULK1c+NDP52	457	472	FVMLHADQDGEKLQAL	24.62	3	14	24.64	25.26	0.426	3.04	0.9304	High	24.52	25.16	0.434	3.103	0.9306	High	24.51	25.09	0.387	2.766	0.9258	High	703	719	ETIPHPNIEQTIHQVSL	29.83	2	13	29.03	29.27	8.648	66.526	0.8698	High		702	721	FETIPHPNIEQTIHQVSLDL	36.69	3	16	36.01	36.15	10.581	66.13	0.7611	High
ULK1c+NDP52	458	472	VMLHADQDGEKLQAL	21.81	2	13	21.8	21.97	0.352	2.707	0.9354	High	21.63	22.04	0.386	2.971	0.9018	High	21.57	22.01	0.284	2.181	0.9313	High	703	721	ETIPHPNIEQTIHQVSLDL	35.74	2	15	34.62	34.87	10.109	67.39	0.8781	High		703	716	ETIPHPNIEQTIHQ	23.32	2	10	23.07	23.17	6.554	65.544	0.7595	High
ULK1c+NDP52	458	472	VMLHADQDGEKLQAL	21.81	3	13	21.69	22.21	0.293	2.255	0.8722	High	21.6	22.15	0.352	2.711	0.9075	High	21.6	22.02	0.339	2.609	0.8583	High	744	759	NLSSPNPISDPQSPEM	22.62	2	10	22.09	22.23	3.729	37.291	0.7148	High		703	719	ETIPHPNIEQTIHQVSL	29.83	2	13	29.37	29.55	8.439	64.913	0.6969	High
ULK1c+NDP52	461	472	HADQDGEKLQAL	18.67	2	10	18.27	18.52	0.187	1.872	0.9373	High	18.12	18.39	0.185	1.851	0.9089	High	18.11	18.39	0.144	1.436	0.9208	High	765	771	YSSVINA	17.44	2	5	16.77	17.05	2.372	47.441	0.7643	High		703	721	ETIPHPNIEQTIHQVSLDL	35.74	2	15	34.97	35.19	9.714	64.761	0.8538	High
ULK1c+NDP52	480	487	LERVKIVE	17.9	2	6	18.03	18.49	0.693	11.558	0.9234	High	18.1	18.47	0.772	12.872	0.9162	High	17.81	18.39	0.717	11.957	0.9303	High	772	794	IDSRRMQDTNVCGKEDFGDHTSL	24.51	3	21	23.76	24.07	8.544	40.683	0.8943	High		744	759	NLSSPNPISDPQSPEM	22.62	2	10	22.35	22.65	4.433	44.325	0.8067	High
ULK1c+NDP52	480	488	LERVKIVEA	18.28	2	7	18.39	18.82	0.783	11.188	0.9127	High	18.29	18.68	0.925	13.215	0.9096	High	18.24	18.73	0.863	12.329	0.9189	High	799	810	ERCRVVAQDSHF	20.93	2	10	20.19	20.5	3.971	39.707	0.8665	High		765	771	YSSVINA	17.44	2	5	17.28	17.51	2.6	52.004	0.5064	High
ULK1c+NDP52	480	489	LERVKIVEAL	22.8	2	8	22.84	23.19	0.916	11.453	0.9317	High	22.77	23.14	1.053	13.159	0.9335	High	22.73	23.06	0.955	11.931	0.936	High	842	855	VEIRNIIEKVKCSL	34.06	2	12	33.38	33.66	6.386	53.214	0.8371	High		772	794	IDSRRMQDTNVCGKEDFGDHTSL	24.51	3	21	24.07	24.47	8.575	40.832	0.8924	High
ULK1c+NDP52	480	495	LERVKIVEALSTVPQM	26.68	2	13	26.56	27.01	1.998	15.37	0.9553	High	26.5	26.84	2.081	16.008	0.9556	High	26.48	26.84	1.972	15.167	0.953	High	856	870	EITLKEKHQKELLSL	26.94	3	13	25.95	26.27	5.029	38.685	0.6111	High		799	810	ERCRVVAQDSHF	20.93	2	10	20.56	20.84	2.461	24.609	0.8532	High
ULK1c+NDP52	480	495	LERVKIVEALSTVPQM	26.68	3	13	26.56	27.01	1.944	14.955	0.9175	High	26.65	27.03	2.034	15.647	0.9376	High	26.39	26.94	1.979	15.226	0.9303	High	869	881	SLKNEYEGKLDGL	26.02	2	11	25.16	25.34	4.518	41.07	0.4845	High		832	841	DFSNSLKCTA	21.82	2	8	21.53	21.64	4.392	54.894	0.587	High
ULK1c+NDP52	487	494	EALSTVPQ	11.84	2	5	12.1	12.5	2.802	56.044	0.8476	High	11.88	12.34	2.713	54.268	0.8839	High	12.39	12.83	2.735	54.691	0.8987	High	882	901	IKETEENENKIKKLKGELVC	25.67	3	18	24.91	25.16	8.02	44.558	0.8642	High		842	855	VEIRNIIEKVKCSL	34.06	2	12	33.68	33.88	7.078	58.984	0.7447	High
ULK1c+NDP52	499	520	AVVEVVRRKMFIKHYREWAGAL	26.97	3	20	26.78	27.05	0.426	2.132	0.8756	High	26.7	26.93	0.56	2.801	0.8616	High	26.69	26.92	0.465	2.324	0.8733	High	903	912	EEVLQNKDNE	13.35	2	8	12.34	12.71	4.28	53.506	0.8815	High		856	870	EITLKEKHQKELLSL	26.94	3	13
ULK1c+NDP52	500	520	VVEVVRRKMFIKHYREWAGAL	26.4	3	19	26.24	26.54	0.412	2.167	0.8902	High	26.15	26.25	0.645	3.395	0.8958	High	26.08	26.28	0.524	2.756	0.8447	High	913	923	FALVKHEKEAV	21.26	2	9	20.41	20.83	5.139	57.1	0.7281	High		869	881	SLKNEYEGKLDGL	26.02	2	11	25.67	25.77	3.986	36.239	0.578	High
ULK1c+NDP52	503	515	VVRRKMFIKHYRE	18.15	3	11	18.17	18.61	0.169	1.539	0.8987	High	18.06	18.48	0.234	2.124	0.9112	High	18.03	18.47	0.213	1.938	0.9288	High	913	925	FALVKHEKEAVIC	24.44	2	11	23.48	23.77	6.147	55.886	0.7459	High		882	901	IKETEENENKIKKLKGELVC	25.67	3	18	25.34	25.43	8.239	45.774	0.6733	High
ULK1c+NDP52	503	515	VVRRKMFIKHYRE	18.15	4	11	18.17	18.65	0.199	1.809	0.8006	High	18.09	18.5	0.285	2.59	0.8622	High	18.09	18.39	0.226	2.055	0.8722	High	914	923	ALVKHEKEAV	15.66	2	8	14.45	14.9	4.563	57.031	0.9015	High		903	912	EEVLQNKDNE	13.35	2	8	12.99	13.32	4.098	51.224	0.8522	High
ULK1c+NDP52	503	519	VVRRKMFIKHYREWAGA	22.24	3	15	22.01	22.06	0.082	0.545	0.5125	High	21.93	22.18	0.087	0.58	0.8044	High	21.88	22.17	0.03	0.202	0.8079	High	924	934	ICLQNEKDQKL	20.97	3	9	20.37	20.52	6.05	67.22	0.7981	High		913	923	FALVKHEKEAV	21.26	2	9	20.81	21.16	5.216	57.956	0.842	High
ULK1c+NDP52	503	520	VVRRKMFIKHYREWAGAL	24.68	2	16	24.76	25.05	0.387	2.42	0.8785	High	24.75	24.91	0.553	3.459	0.8884	High	24.65	25.08	0.377	2.358	0.8906	High	924	936	ICLQNEKDQKLLE	23.39	2	11	22.62	22.91	6.236	56.694	0.877	High		913	925	FALVKHEKEAVIC	24.44	2	11	23.96	24.1	6.149	55.898	0.712	High
ULK1c+NDP52	503	520	VVRRKMFIKHYREWAGAL	24.68	3	16	24.83	25.11	0.45	2.814	0.9532	High	24.69	25.11	0.542	3.389	0.9582	High	24.67	25.11	0.452	2.828	0.958	High	926	934	LQNEKDQKL	14.52	2	7	13.6	13.77	4.632	66.177	0.6431	High		914	923	ALVKHEKEAV	15.66	2	8	15.04	15.52	4.466	55.829	0.8911	High
ULK1c+NDP52	520	540	LVKDGKRLYEAEKSKRESFGK	21.02	6	19	20.73	21.28	1.583	8.333	0.9166	High	20.74	21	1.754	9.23	0.9197	High	20.69	20.99	1.888	9.935	0.872	High	937	947	MENIMHSQNCE	20.42	2	9	19.5	19.88	3.979	44.211	0.8673	High		924	934	ICLQNEKDQKL	20.97	3	9	20.71	20.85	6.18	68.671	0.8628	High
ULK1c+NDP52	521	531	VKDGKRLYEAE	15.32	2	9	15.38	15.64	0.41	4.558	0.7356	High	15.19	15.36	0.406	4.507	0.7646	High	15.27	15.64	0.332	3.684	0.721	High	947	956	EIKELKQSRE	14.92	2	8	14.18	14.43	3.934	49.169	0.7709	High		924	936	ICLQNEKDQKLLE	23.39	2	11	23.05	23.19	6.608	60.071	0.8678	High
ULK1c+NDP52	521	541	VKDGKRLYEAEKSKRESFGKL	21.06	2	19	20.83	21.21	1.374	7.229	0.8495	High	20.78	20.97	1.536	8.083	0.8999	High	20.66	21.06	1.336	7.034	0.8304	High	948	956	IKELKQSRE	12.58	2	7	11.8	12.33	3.629	51.848	0.8991	High		926	934	LQNEKDQKL	14.52	2	7	14.22	14.3	4.391	62.723	0.6333	High
ULK1c+NDP52	521	541	VKDGKRLYEAEKSKRESFGKL	21.06	3	19	20.91	21.07	1.629	8.574	0.9111	High	20.72	21.02	2.011	10.586	0.8945	High	20.66	21.05	1.751	9.214	0.8873	High	948	956	IKELKQSRE	12.58	3	7	11.89	12.21	3.864	55.201	0.7924	High		937	947	MENIMHSQNCE	20.42	2	9	20.06	20.44	4.117	45.748	0.8824	High
ULK1c+NDP52	521	541	VKDGKRLYEAEKSKRESFGKL	21.06	4	19	20.75	21.22	1.591	8.371	0.9307	High	20.66	21.14	1.879	9.892	0.928	High	20.63	21.11	1.639	8.628	0.9349	High	957	970	IVLEDLKKLHVEND	26.98	2	12	26.16	26.42	5.328	44.404	0.8527	High		938	947	ENIMHSQNCE	16.64	2	8	16.47	16.84	3.814	47.679	0.8478	High
ULK1c+NDP52	521	541	VKDGKRLYEAEKSKRESFGKL	21.06	5	19	20.75	21.2	1.467	7.719	0.9334	High	20.62	21.1	1.667	8.773	0.9082	High	20.6	21.02	1.56	8.208	0.9341	High	957	970	IVLEDLKKLHVEND	26.98	3	12	26.16	26.47	5.583	46.522	0.8031	High		947	956	EIKELKQSRE	14.92	2	8	14.8	14.93	4.501	56.258	0.6178	High
ULK1c+NDP52	521	541	VKDGKRLYEAEKSKRESFGKL	21.06	6	19	20.6	21.54	1.581	8.322	0.9218	High	20.59	21.23	1.808	9.514	0.9146	High	20.59	21.17	1.867	9.825	0.8438	High	957	975	IVLEDLKKLHVENDEKLQL	30.55	2	17	29.77	30.22	7.251	42.653	0.9032	High		948	956	IKELKQSRE	12.58	2	7	12.38	12.44	4.025	57.502	0.8203	High
ULK1c+NDP52	528	541	YEAEKSKRESFGKL	19.37	3	12	19.41	19.65	1.221	10.177	0.9276	High	19.44	19.6	1.445	12.04	0.8641	High	19.27	19.51	1.255	10.459	0.873	High	957	975	IVLEDLKKLHVENDEKLQL	30.55	3	17	29.81	30.21	7.146	42.037	0.9169	High		948	956	IKELKQSRE	12.58	3	7	12.38	12.76	4.123	58.906	0.8546	High
ULK1c+NDP52	542	551	FRKSFLRNRL	21.83	4	8	21.76	22.2	4.895	61.192	0.8963	High	21.66	22.06	4.847	60.591	0.9007	High	21.63	22.05	4.848	60.603	0.8892	High	957	975	IVLEDLKKLHVENDEKLQL	30.55	4	17	29.8	30.21	7.279	42.816	0.9135	High		957	970	IVLEDLKKLHVEND	26.98	2	12	26.52	26.7	5.895	49.128	0.6656	High
ULK1c+NDP52	552	562	FRGLDSWPPSF	28.07	2	7	27.62	28.18	3.896	55.656	0.8917	High	27.42	27.86	3.808	54.395	0.93	High	27.47	27.92	3.831	54.731	0.9205	High	960	975	EDLKKLHVENDEKLQL	25.78	2	14	25.12	25.32	5.495	39.252	0.8142	High		957	970	IVLEDLKKLHVEND	26.98	3	12	26.7	26.88	5.964	49.698	0.5562	High
ULK1c+NDP52	563	574	CTQKPRKFDCEL	21.5	3	9	21.14	21.65	5.322	59.136	0.9139	High	21.06	21.58	5.197	57.746	0.928	High	21	21.64	5.258	58.425	0.9158	High	960	975	EDLKKLHVENDEKLQL	25.78	3	14	25.13	25.35	5.531	39.504	0.8881	High		957	975	IVLEDLKKLHVENDEKLQL	30.55	2	17	30.12	30.23	7.991	47.006	0.8146	High
ULK1c+NDP52	563	579	CTQKPRKFDCELPDISL	27.27	2	13	26.94	27.42	6.751	51.933	0.7363	High	26.89	27.36	6.948	53.445	0.6566	High	26.9	27.31	6.997	53.826	0.6998	High	976	980	LRAEL	18.86	2	3	18.12	18.61	0.482	16.077	0.8606	High		957	975	IVLEDLKKLHVENDEKLQL	30.55	3	17	30.08	30.24	7.919	46.581	0.8318	High
ULK1c+NDP52	575	583	PDISLKDLQ	22.48	2	7	22.44	22.85	2.297	32.809	0.8861	High	22.28	22.75	2.372	33.882	0.7328	High	22.28	22.71	2.357	33.678	0.8793	High	981	988	QSLEQSHL	18.81	2	6	17.99	18.35	3.667	61.112	0.6848	High		957	975	IVLEDLKKLHVENDEKLQL	30.55	4	17	30.07	30.27	7.905	46.502	0.7541	High
ULK1c+NDP52	575	584	PDISLKDLQF	28.33	2	8	27.81	28.14	2.606	32.577	0.9115	High	27.75	28.09	2.618	32.724	0.9166	High	27.73	28.03	2.592	32.403	0.9153	High	981	990	QSLEQSHLKE	16.49	2	8	15.8	16.14	4.353	54.413	0.8729	High		960	975	EDLKKLHVENDEKLQL	25.78	2	14	25.55	25.69	6.388	45.631	0.6867	High
ULK1c+NDP52	584	602	FLQSFCPSEVQPFLRVPLL	34.21	2	14	33.69	34.07	3.865	27.61	0.9171	High	33.72	33.89	3.858	27.555	0.8833	High	33.71	33.9	3.907	27.909	0.8949	High	989	995	KELEDTL	20.49	2	5	19.45	19.88	2.414	48.28	0.9013	High		960	975	EDLKKLHVENDEKLQL	25.78	3	14	25.51	25.72	6.37	45.497	0.8203	High
ULK1c+NDP52	585	599	LQSFCPSEVQPFLRV	28.68	2	11	28.67	28.96	2.392	21.749	0.8717	High	28.63	28.84	2.561	23.28	0.8904	High	28.52	28.83	2.475	22.497	0.8917	High	996	1002	QVRHIQE	12.46	2	5	11.51	12.1	3.117	62.348	0.8893	High		976	980	LRAEL	18.86	2	3	18.83	18.89	0.675	22.484	0.8538	High
ULK1c+NDP52	585	602	LQSFCPSEVQPFLRVPLL	33.15	2	13	32.45	32.82	4.602	35.398	0.9104	High	32.53	32.7	4.571	35.163	0.9097	High	32.33	32.84	4.612	35.48	0.9096	High	996	1003	QVRHIQEF	21.11	2	6	20.05	20.56	3.248	54.136	0.9013	High		981	988	QSLEQSHL	18.81	2	6	18.57	19.03	3.463	57.709	0.8488	High
ULK1c+NDP52	585	602	LQSFCPSEVQPFLRVPLL	33.15	3	13	32.4	32.83	3.392	26.095	0.9156	High	32.39	32.79	3.568	27.446	0.8851	High	32.37	32.67	3.533	27.174	0.8668	High	1003	1014	FEKVMTDHRVSL	23.93	3	10	23.11	23.53	4.199	41.993	0.9033	High		981	990	QSLEQSHLKE	16.49	2	8	16.33	16.55	4.499	56.234	0.8914	High
ULK1c+NDP52	585	603	LQSFCPSEVQPFLRVPLLC	33.11	2	14	33.21	33.4	4.624	33.029	0.8423	High	32.98	33.32	4.727	33.766	0.8418	High	32.99	33.15	4.762	34.012	0.8271	High	1003	1016	FEKVMTDHRVSLEE	23	2	12	22.28	22.66	4.359	36.329	0.8783	High		989	995	KELEDTL	20.49	2	5	19.96	20.35	2.493	49.863	0.8911	High
ULK1c+NDP52	585	604	LQSFCPSEVQPFLRVPLLCD	32.64	2	15	32.75	33.04	4.754	31.691	0.8986	High	32.65	32.94	4.886	32.572	0.8536	High	32.63	32.84	4.844	32.294	0.8475	High	1003	1016	FEKVMTDHRVSLEE	23	3	12	22.3	22.63	4.404	36.697	0.8409	High		996	1002	QVRHIQE	12.46	2	5	12.14	12.36	3.075	61.5	0.8852	High
ULK1c+NDP52	588	602	FCPSEVQPFLRVPLL	31.73	2	10	31.85	32.17	3.811	38.109	0.8341	High	31.75	32.06	3.801	38.007	0.8484	High	31.77	32.1	3.772	37.719	0.8542	High	1004	1014	EKVMTDHRVSL	21.36	2	9	20.59	20.95	3.77	41.887	0.895	High		996	1003	QVRHIQEF	21.11	2	6	20.63	21.06	3.361	56.024	0.8344	High
ULK1c+NDP52	590	602	PSEVQPFLRVPLL	30.04	2	9	30.1	30.51	3.013	33.481	0.8977	High	29.87	30.46	3.103	34.476	0.8789	High	29.94	30.48	3.073	34.149	0.8643	High	1015	1027	EELKKENQQIINQ	16.93	2	11	16.39	16.58	2.627	23.882	0.8746	High		1003	1014	FEKVMTDHRVSL	23.93	2	10	23.47	23.57	4.555	45.555	0.618	High
ULK1c+NDP52	603	615	CDFEPLHQHVLAL	26.87	2	10	26.45	27.06	4.001	40.008	0.8697	High	26.37	26.95	3.977	39.768	0.8915	High	26.38	26.96	3.929	39.291	0.8812	High	1028	1045	IQESHAEIIQEKEKQLQE	22.09	2	16	21.4	21.79	3.874	24.213	0.9307	High		1003	1014	FEKVMTDHRVSL	23.93	3	10	23.49	23.68	4.525	45.249	0.8145	High
ULK1c+NDP52	603	627	CDFEPLHQHVLALHNLVKAAQSLDE	30.74	3	22	30.42	30.79	8.472	38.511	0.7708	High	30.38	30.74	8.8	39.998	0.7534	High	30.33	30.66	8.992	40.872	0.7947	High	1028	1045	IQESHAEIIQEKEKQLQE	22.09	3	16	21.36	21.84	4.239	26.493	0.7676	High		1003	1016	FEKVMTDHRVSLEE	23	2	12	22.6	22.92	4.766	39.717	0.8935	High
ULK1c+NDP52	604	615	DFEPLHQHVLAL	26.62	2	9	26.07	26.55	3.593	39.92	0.844	High	26.01	26.44	3.596	39.956	0.8813	High	25.95	26.44	3.483	38.698	0.8617	High	1034	1045	EIIQEKEKQLQE	20.57	2	10	19.54	20.01	2.292	22.92	0.9189	High		1003	1016	FEKVMTDHRVSLEE	23	3	12	22.67	22.83	4.818	40.15	0.7885	High
ULK1c+NDP52	605	627	FEPLHQHVLALHNLVKAAQSLDE	29.27	3	20	29.1	29.65	7.209	36.044	0.8078	High	28.99	29.53	7.708	38.539	0.8275	High	29.01	29.46	7.181	35.905	0.819	High	1046	1053	LKLKVSDL	25.1	2	6	24.3	24.58	1.405	23.417	0.7561	High		1004	1014	EKVMTDHRVSL	21.36	2	9	21.02	21.38	4.041	44.899	0.8908	High
ULK1c+NDP52	616	625	HNLVKAAQSL	19.7	2	8	19.59	19.96	5.79	72.381	0.81	High	19.45	19.86	5.833	72.912	0.7978	High	19.4	19.86	5.775	72.182	0.7738	High	1049	1060	KVSDLSDTRCKL	22.26	2	10	21.19	21.4	4.086	40.855	0.9185	High		1015	1027	EELKKENQQIINQ	16.93	2	11	16.79	17.2	2.65	24.088	0.8714	High
ULK1c+NDP52	626	635	DEMSQTITDL	24.37	2	8	24.01	24.34	5.634	70.422	0.8607	High	23.89	24.07	5.805	72.569	0.8578	High	23.9	24.04	5.655	70.69	0.8663	High	1049	1060	KVSDLSDTRCKL	22.26	3	10	21.26	21.44	4.218	42.18	0.8933	High		1028	1045	IQESHAEIIQEKEKQLQE	22.09	2	16	21.74	22.12	3.979	24.869	0.8533	High
ULK1c+NDP52	636	656	LSEQKASVSQTSPQSASSPRM	16.2	2	17	16.25	16.66	12.245	72.032	0.8758	High	16.13	16.61	11.938	70.225	0.8908	High	16.11	16.51	12.1	71.177	0.9039	High	1054	1060	SDTRCKL	15.78	2	5	15.19	15.34	2.683	53.664	0.8302	High		1028	1045	IQESHAEIIQEKEKQLQE	22.09	3	16	21.72	22.13	4.001	25.009	0.7678	High
ULK1c+NDP52	636	656	LSEQKASVSQTSPQSASSPRM	16.2	3	17	16.36	16.57	12.335	72.559	0.7932	High	16.36	16.44	12.073	71.018	0.5306	High	16.17	16.53	12.294	72.319	0.7824	High	1064	1073	LALKEAETDE	17.91	2	8	17.33	17.83	2.294	28.674	0.8853	High		1034	1045	EIIQEKEKQLQE	20.57	2	10	19.87	20.25	2.374	23.736	0.9089	High
ULK1c+NDP52	657	681	ESTAGITTTTSPRTPPPLTVQDPLC	23.91	2	18	23.7	24.05	12.333	68.514	0.6972	High	23.58	23.97	12.348	68.601	0.7299	High	23.55	23.94	12.511	69.505	0.7924	High	1074	1080	IKILLEE	25.8	2	5	25.33	25.62	0.984	19.673	0.848	High		1046	1053	LKLKVSDL	25.1	2	6	24.74	24.88	1.452	24.201	0.8392	High
ULK1c+NDP52	657	685	ESTAGITTTTSPRTPPPLTVQDPLCPAVC	25.53	3	21	25.46	25.83	13.355	63.594	0.8662	High	25.37	25.82	12.982	61.82	0.8827	High	25.38	25.8	13.025	62.023	0.8543	High	1078	1093	LEESRAQQKETLKSLL	27.08	3	14	26.03	26.26	9.834	70.243	0.8547	High		1049	1060	KVSDLSDTRCKL	22.26	2	10	21.68	22.16	4.091	40.91	0.9185	High
ULK1c+NDP52	686	701	PLEELSPDSIDAHTFD	24.85	2	13	24.86	25	6.959	53.53	0.8723	High	24.69	24.99	6.687	51.435	0.8672	High	24.67	24.99	6.844	52.646	0.9039	High	1101	1107	RTEISKL	18.84	2	5	18.05	18.63	1.135	22.699	0.873	High		1049	1060	KVSDLSDTRCKL	22.26	3	10	21.75	22.12	4.168	41.677	0.884	High
ULK1c+NDP52	702	716	FETIPHPNIEQTIHQ	22.51	2	11	22.49	22.75	7.82	71.091	0.8702	High	22.38	22.68	7.645	69.5	0.8591	High	22.48	22.72	7.645	69.501	0.8791	High	1101	1116	RTEISKLNQKIQDNNE	21.38	3	14	20.56	20.91	3.669	26.21	0.8111	High		1054	1060	SDTRCKL	15.78	2	5	15.82	16.08	2.431	48.618	0.8108	High
ULK1c+NDP52	702	716	FETIPHPNIEQTIHQ	22.51	3	11	22.47	22.76	7.763	70.577	0.8826	High	22.4	22.63	7.469	67.904	0.8134	High	22.38	22.69	7.575	68.867	0.8454	High	1140	1148	LISRHEEES	11.71	2	7	11.25	11.53	1.663	23.752	0.7243	High		1064	1073	LALKEAETDE	17.91	2	8	17.7	18.24	2.294	28.67	0.8375	High
ULK1c+NDP52	702	718	FETIPHPNIEQTIHQVS	24.63	2	13	24.58	24.79	9.001	69.237	0.6609	High	24.47	24.67	8.89	68.387	0.7909	High	24.46	24.7	8.873	68.253	0.749	High	1140	1151	LISRHEEESNIL	23.15	2	10	21.97	22.2	2.276	22.76	0.9097	High		1074	1080	IKILLEE	25.8	2	5	25.31	25.62	0.985	19.709	0.8642	High
ULK1c+NDP52	702	718	FETIPHPNIEQTIHQVS	24.63	3	13	24.73	24.91	9.488	72.986	0.7717	High	24.44	24.69	9.459	72.759	0.8027	High	24.43	24.66	9.413	72.407	0.8002	High	1152	1167	KAELNKVTSLHNQAFE	23.05	2	14	22.15	22.22	6.89	49.212	0.8468	High		1078	1093	LEESRAQQKETLKSLL	27.08	3	14	26.49	26.77	10.09	72.068	0.7599	High
ULK1c+NDP52	702	719	FETIPHPNIEQTIHQVSL	27.32	2	14	27.07	27.26	10.146	72.471	0.5557	High	26.96	27.21	9.84	70.284	0.7618	High	26.9	27.25	9.956	71.114	0.7538	High	1156	1166	NKVTSLHNQAF	20.62	2	9	20.08	20.47	5.5	61.107	0.8767	High		1101	1107	RTEISKL	18.84	2	5	18.6	19.22	1.192	23.834	0.8933	High
ULK1c+NDP52	702	719	FETIPHPNIEQTIHQVSL	27.32	3	14	26.98	27.33	10.15	72.5	0.8544	High	26.95	27.28	9.95	71.074	0.8426	High	26.92	27.12	10.039	71.71	0.8122	High	1156	1167	NKVTSLHNQAFE	20.09	2	10	19.48	20	6.094	60.936	0.887	High		1101	1116	RTEISKLNQKIQDNNE	21.38	3	14	20.94	21.25	3.996	28.542	0.7714	High
ULK1c+NDP52	702	721	FETIPHPNIEQTIHQVSLDL	31.39	2	16	31.27	31.75	11.474	71.712	0.909	High	31.21	31.66	11.185	69.908	0.9086	High	31.16	31.66	11.305	70.654	0.9061	High	1166	1179	FEIEKNLKEQIIEL	31.61	2	12	31.24	31.47	2.689	22.41	0.8734	High		1140	1148	LISRHEEES	11.71	2	7	11.48	11.93	1.718	24.548	0.7994	High
ULK1c+NDP52	702	721	FETIPHPNIEQTIHQVSLDL	31.39	3	16	31.29	31.67	11.598	72.487	0.8927	High	31.17	31.6	11.356	70.976	0.8693	High	31.25	31.48	11.257	70.355	0.8862	High	1191	1205	ERQKDEKITQQEEKY	17.4	3	13	16.68	17.14	7.796	59.973	0.5779	High		1140	1151	LISRHEEESNIL	23.15	2	10	22.35	22.79	2.502	25.02	0.8769	High
ULK1c+NDP52	703	719	ETIPHPNIEQTIHQVSL	26.18	2	13	25.93	26.17	9.436	72.581	0.8746	High	25.86	26.13	9.247	71.128	0.8783	High	25.81	26.04	9.196	70.738	0.8493	High	1191	1212	ERQKDEKITQQEEKYEAIIQNL	31.19	3	20	30.47	30.78	9.417	47.087	0.7994	High		1152	1167	KAELNKVTSLHNQAFE	23.05	2	14	22.4	22.68	7.004	50.027	0.5761	High
ULK1c+NDP52	703	721	ETIPHPNIEQTIHQVSLDL	30.7	2	15	30.54	30.74	10.651	71.004	0.8668	High	30.47	30.65	10.705	71.369	0.8764	High	30.44	30.66	10.615	70.765	0.9148	High	1213	1230	EKDRQKLVSSQEQDREQL	19.93	2	16	19.04	19.39	9.354	58.463	0.766	High		1156	1166	NKVTSLHNQAF	20.62	2	9	20.48	20.97	5.498	61.09	0.8704	High
ULK1c+NDP52	703	721	ETIPHPNIEQTIHQVSLDL	30.7	3	15	30.47	30.75	10.827	72.183	0.8455	High	30.38	30.67	10.679	71.196	0.852	High	30.49	30.65	10.637	70.916	0.8744	High	1231	1236	IQKLNC	15.77	2	4	15.14	15.55	2.179	54.469	0.8492	High		1156	1167	NKVTSLHNQAFE	20.09	2	10	19.83	20.46	6.148	61.483	0.9171	High
ULK1c+NDP52	744	759	NLSSPNPISDPQSPEM	20.48	2	10	20.48	20.66	6.485	64.847	0.8276	High	20.28	20.54	6.559	65.593	0.8596	High	20.2	20.34	6.391	63.914	0.8545	High	1237	1248	EKDEAIQTALKE	20.94	2	10	20.22	20.51	3.537	35.366	0.8681	High		1166	1179	FEIEKNLKEQIIEL	31.61	2	12	31.33	31.56	2.873	23.943	0.8323	High
ULK1c+NDP52	765	794	YSSVINAIDSRRMQDTNVCGKEDFGDHTSL	26.02	3	28	25.84	26.07	14.727	52.597	0.7809	High	25.66	25.97	14.54	51.927	0.8766	High	25.77	25.88	14.017	50.06	0.8333	High	1249	1254	FKLERE	19.29	2	4	18.01	18.41	2.76	69.003	0.8569	High		1191	1205	ERQKDEKITQQEEKY	17.4	3	13	17.24	17.37	7.504	57.722	0.8084	High
ULK1c+NDP52	772	794	IDSRRMQDTNVCGKEDFGDHTSL	21.56	3	21	21.53	21.93	9.985	47.548	0.8823	High	21.46	21.75	9.943	47.35	0.8657	High	21.37	21.84	9.774	46.542	0.8639	High	1255	1261	VVEKELL	21.67	2	5	20.78	21.21	1.665	33.3	0.8502	High		1191	1212	ERQKDEKITQQEEKYEAIIQNL	31.19	3	20	30.89	31.1	9.505	47.527	0.8122	High
ULK1c+NDP52	772	794	IDSRRMQDTNVCGKEDFGDHTSL	21.56	4	21	21.53	21.88	10.209	48.615	0.8794	High	21.42	21.74	9.732	46.344	0.8364	High	21.42	21.7	9.93	47.284	0.8721	High	1262	1287	EKVKHLENQIAKSPAIDSTRGDSSSL	22.75	3	23	22.21	22.57	10.963	47.665	0.9176	High		1213	1230	EKDRQKLVSSQEQDREQL	19.93	2	16	19.5	19.75	9.623	60.142	0.8285	High
ULK1c+NDP52	799	810	ERCRVVAQDSHF	18.55	2	10	18.79	19.04	4.248	42.477	0.8068	High	18.68	18.87	4.242	42.42	0.7812	High	18.38	18.93	4.198	41.977	0.8314	High	1271	1287	IAKSPAIDSTRGDSSSL	19.25	2	14	18.61	19	7.668	54.774	0.8834	High		1231	1236	IQKLNC	15.77	2	4	15.76	16.21	2.199	54.987	0.7958	High
ULK1c+NDP52	811	817	SIQTIKE	14.24	2	5	14.36	14.59	3.96	79.204	0.6981	High	14.17	14.49	3.848	76.957	0.8139	High	14.35	14.65	3.765	75.294	0.7859	High	1288	1302	VAELQEKLQEEKAKF	27.18	3	13	26.24	26.43	9.197	70.744	0.7472	High		1237	1248	EKDEAIQTALKE	20.94	2	10	20.72	20.98	3.567	35.668	0.8939	High
ULK1c+NDP52	811	822	SIQTIKEDLCHF	28.88	2	10	28.53	28.7	7.232	72.324	0.694	High	28.42	28.62	7.374	73.744	0.6141	High	28.42	28.57	7.154	71.537	0.6868	High	1291	1302	LQEKLQEEKAKF	21.81	3	10	20.94	21.2	5.954	59.538	0.8516	High		1249	1254	FKLERE	19.29	2	4	18.6	19.02	2.802	70.046	0.8809	High
ULK1c+NDP52	823	832	RTFVQKEQCD	15.01	2	8	14.94	15.22	5.818	72.727	0.7804	High	14.8	14.95	5.731	71.635	0.8177	High	14.96	15.1	5.586	69.829	0.734	High	1292	1302	QEKLQEEKAKF	20.04	2	9	19.19	19.61	4.907	54.517	0.9091	High		1255	1261	VVEKELL	21.67	2	5	21.51	21.67	1.71	34.204	0.8121	High
ULK1c+NDP52	842	849	VEIRNIIE	21.53	2	6	21.38	21.8	1.461	24.342	0.8992	High	21.29	21.65	1.529	25.48	0.8378	High	21.26	21.57	1.525	25.416	0.7699	High	1303	1324	LEQLEEQEKRKNEEMQNVRTSL	25.19	3	20	24.27	24.53	13.729	68.647	0.9042	High		1262	1287	EKVKHLENQIAKSPAIDSTRGDSSSL	22.75	3	23	22.52	22.74	11.483	49.924	0.8824	High
ULK1c+NDP52	842	855	VEIRNIIEKVKCSL	29.45	2	12	29.32	29.67	2.911	24.262	0.7728	High	29.27	29.53	3.017	25.142	0.7234	High	29.24	29.57	3.044	25.368	0.7761	High	1306	1324	LEEQEKRKNEEMQNVRTSL	22.63	3	17	21.46	21.66	10.634	62.551	0.8482	High		1271	1287	IAKSPAIDSTRGDSSSL	19.25	2	14	19.03	19.36	7.685	54.892	0.8999	High
ULK1c+NDP52	842	855	VEIRNIIEKVKCSL	29.45	3	12	29.13	29.78	3.085	25.706	0.8806	High	29.21	29.78	3.238	26.984	0.844	High	29.18	29.7	3.12	25.997	0.8475	High	1307	1324	EEQEKRKNEEMQNVRTSL	21.6	3	16	20.75	21.07	9.275	57.966	0.8899	High		1288	1302	VAELQEKLQEEKAKF	27.18	2	13	26.55	26.69	9.967	76.669	0.806	High
ULK1c+NDP52	842	856	VEIRNIIEKVKCSLE	29.48	2	13	29.4	29.58	3.288	25.294	0.846	High	29.3	29.56	3.417	26.287	0.7918	High	29.29	29.51	3.408	26.213	0.7764	High	1319	1324	NVRTSL	16.92	2	4	15.58	15.97	3.14	78.493	0.8717	High		1288	1302	VAELQEKLQEEKAKF	27.18	3	13	26.55	26.78	10.206	78.504	0.8634	High
ULK1c+NDP52	842	856	VEIRNIIEKVKCSLE	29.48	3	13	29.4	29.59	3.409	26.222	0.8568	High	29.28	29.52	3.437	26.442	0.8135	High	29.22	29.51	3.52	27.08	0.8379	High	1325	1332	IAEQQTNF	17.58	2	6	16.52	16.87	2.352	39.208	0.8713	High		1291	1302	LQEKLQEEKAKF	21.81	3	10	21.32	21.45	6.635	66.348	0.8694	High
ULK1c+NDP52	856	870	EITLKEKHQKELLSL	23.56	3	13	23.47	23.79	2.512	19.325	0.7489	High	23.39	23.7	2.825	21.728	0.7846	High	23.38	23.66	2.629	20.222	0.8341	High	1337	1349	TREKMRKENIIND	18.32	2	11	17.64	18	5.673	51.575	0.8947	High		1292	1302	QEKLQEEKAKF	20.04	2	9	19.61	19.84	5.77	64.111	0.8468	High
ULK1c+NDP52	856	881	EITLKEKHQKELLSLKNEYEGKLDGL	26.03	3	24	25.72	26.17	4.55	18.956	0.919	High	25.72	26.17	4.549	18.954	0.8308	High	25.72	26.17	4.514	18.809	0.9038	High	1350	1366	LSDKLKSTMQQQERDKD	20.06	2	15	19.54	19.76	4.769	31.795	0.8494	High		1303	1324	LEQLEEQEKRKNEEMQNVRTSL	25.19	3	20	24.7	24.84	14.042	70.211	0.7857	High
ULK1c+NDP52	856	881	EITLKEKHQKELLSLKNEYEGKLDGL	26.03	4	24	25.89	26.11	5.011	20.881	0.8362	High	25.77	26.02	5.164	21.518	0.8613	High	25.72	26.05	4.903	20.431	0.9022	High	1350	1366	LSDKLKSTMQQQERDKD	20.06	3	15	19.51	19.66	4.607	30.71	0.7753	High		1306	1324	LEEQEKRKNEEMQNVRTSL	22.63	3	17	21.94	22.01	10.855	63.855	0.7551	High
ULK1c+NDP52	857	881	ITLKEKHQKELLSLKNEYEGKLDGL	25.86	3	23	25.83	25.97	4.213	18.317	0.8681	High	25.69	25.84	4.387	19.075	0.8946	High	25.68	25.87	4.199	18.257	0.879	High	1350	1369	LSDKLKSTMQQQERDKDLIE	24.49	2	18	23.72	24.08	4.616	25.643	0.8927	High		1307	1324	EEQEKRKNEEMQNVRTSL	21.6	3	16	21.23	21.52	9.735	60.844	0.7961	High
ULK1c+NDP52	857	881	ITLKEKHQKELLSLKNEYEGKLDGL	25.86	4	23	25.82	25.99	4.422	19.226	0.667	High	25.7	25.92	4.592	19.964	0.7582	High	25.67	25.9	4.768	20.733	0.8805	High	1350	1369	LSDKLKSTMQQQERDKDLIE	24.49	3	18	23.77	24.12	4.468	24.823	0.8987	High		1319	1324	NVRTSL	16.92	2	4	16.15	16.67	3.112	77.792	0.6498	High
ULK1c+NDP52	869	881	SLKNEYEGKLDGL	22.88	2	11	22.92	23.02	1.872	17.018	0.8305	High	22.74	23	2.193	19.939	0.814	High	22.74	22.94	2.101	19.096	0.8639	High	1353	1369	KLKSTMQQQERDKDLIE	21.35	3	15	20.6	20.78	4.353	29.017	0.7333	High		1325	1332	IAEQQTNF	17.58	2	6	17.05	17.42	3.247	54.124	0.8775	High
ULK1c+NDP52	882	899	IKETEENENKIKKLKGEL	21.36	2	16	21.19	21.49	1.373	8.582	0.7499	High	21.06	21.33	1.425	8.906	0.693	High	21.04	21.38	1.832	11.45	0.8041	High	1359	1369	QQQERDKDLIE	17.61	2	9	16.75	16.99	0.724	8.039	0.8083	High		1337	1349	TREKMRKENIIND	18.32	2	11	18.1	18.39	6.093	55.395	0.8893	High
ULK1c+NDP52	882	899	IKETEENENKIKKLKGEL	21.36	4	16	21.13	21.47	1.592	9.949	0.7429	High	21.05	21.5	1.818	11.362	0.7723	High	20.92	21.37	1.816	11.348	0.8465	High	1370	1378	SLSEDRARL	20.1	3	7	19.53	19.69	0.07	0.999	0.8175	High		1350	1366	LSDKLKSTMQQQERDKD	20.06	2	15	19.81	20.11	5.998	39.985	0.8321	High
ULK1c+NDP52	882	901	IKETEENENKIKKLKGELVC	22.46	3	18	22.43	22.74	1.663	9.239	0.898	High	22.34	22.71	1.784	9.911	0.9168	High	22.32	22.71	1.706	9.478	0.9264	High	1370	1392	SLSEDRARLLEEKKKLEEEVSKL	33.53	3	21	33.06	33.46	2.85	13.572	0.9526	High		1350	1366	LSDKLKSTMQQQERDKD	20.06	3	15	19.73	19.88	5.841	38.941	0.8999	High
ULK1c+NDP52	903	912	EEVLQNKDNE	12.93	2	8	12.65	13.22	2.671	33.382	0.8496	High	12.41	12.97	2.776	34.704	0.8805	High	13.02	13.41	2.733	34.162	0.8765	High	1372	1392	SEDRARLLEEKKKLEEEVSKL	31.1	3	19	30.37	30.68	2.928	15.412	0.8831	High		1350	1369	LSDKLKSTMQQQERDKDLIE	24.49	2	18	24.09	24.31	5.571	30.952	0.7662	High
ULK1c+NDP52	913	923	FALVKHEKEAV	18.87	2	9	18.83	19.2	3.777	41.966	0.8777	High	18.67	19.08	4.01	44.556	0.8906	High	18.69	19.04	3.865	42.94	0.902	High	1379	1390	LEEKKKLEEEVS	19.12	2	10	18.38	18.63	1.214	12.138	0.8141	High		1350	1369	LSDKLKSTMQQQERDKDLIE	24.49	3	18	24.15	24.3	5.44	30.221	0.8392	High
ULK1c+NDP52	914	923	ALVKHEKEAV	14.06	2	8	14.18	14.62	3.388	42.348	0.9017	High	13.97	14.49	3.564	44.556	0.8864	High	14.13	14.67	3.457	43.217	0.883	High	1379	1392	LEEKKKLEEEVSKL	26.39	2	12	25.66	26.05	2.674	22.281	0.9198	High		1353	1369	KLKSTMQQQERDKDLIE	21.35	3	15	21.05	21.21	4.917	32.782	0.6608	High
ULK1c+NDP52	924	934	ICLQNEKDQKL	18.7	2	9	18.81	19.1	4.793	53.256	0.8408	High	18.71	19.03	4.976	55.284	0.8612	High	18.68	19.01	4.892	54.36	0.8648	High	1379	1392	LEEKKKLEEEVSKL	26.39	3	12	25.64	26.11	2.708	22.568	0.9334	High		1359	1369	QQQERDKDLIE	17.61	2	9	17.52	17.62	1.397	15.527	0.7645	High
ULK1c+NDP52	924	934	ICLQNEKDQKL	18.7	3	9	18.85	19.06	5.132	57.018	0.746	High	18.73	18.91	5.243	58.252	0.8015	High	18.7	18.96	5.145	57.164	0.8056	High	1393	1409	RSSSFVPSPYVATAPEL	27.78	2	12	26.6	27.14	7.237	60.309	0.8996	High		1370	1378	SLSEDRARL	20.1	3	7	19.93	20.21	0.234	3.343	0.8187	High
ULK1c+NDP52	924	936	ICLQNEKDQKLLE	20.74	2	11	20.74	21.06	5.001	45.463	0.5453	High	20.6	20.97	5.087	46.242	0.5443	High	20.59	20.89	4.883	44.389	0.5368	High	1397	1409	FVPSPYVATAPEL	26.75	2	8	26.12	26.31	3.728	46.594	0.6585	High		1370	1392	SLSEDRARLLEEKKKLEEEVSKL	33.53	3	21	33.34	33.7	3.01	14.333	0.9156	High
ULK1c+NDP52	924	936	ICLQNEKDQKLLE	20.74	3	11	20.75	20.98	4.844	44.04	0.7383	High	20.63	20.93	4.863	44.208	0.5466	High	20.61	20.93	4.884	44.401	0.8374	High	1410	1427	YGACAPELPGESDRSAVE	22.57	2	14	22.06	22.45	6.875	49.107	0.9296	High		1372	1392	SEDRARLLEEKKKLEEEVSKL	31.1	3	19	30.73	30.84	2.953	15.542	0.7029	High
ULK1c+NDP52	935	947	LEMENIMHSQNCE	22.86	2	11	22.75	23.04	1.269	11.539	0.8244	High	22.64	22.94	1.424	12.941	0.8429	High	22.62	22.97	1.21	10.996	0.8126	High	1410	1438	YGACAPELPGESDRSAVETADEGRVDSAM	26.44	3	25	25.5	25.88	13.356	53.423	0.8038	High		1379	1390	LEEKKKLEEEVS	19.12	2	10	18.78	19.05	1.093	10.931	0.8501	High
ULK1c+NDP52	937	947	MENIMHSQNCE	18.41	2	9	18.39	18.8	0.953	10.587	0.8483	High	18.28	18.73	1.123	12.483	0.8748	High	18.22	18.73	1.027	11.407	0.8767	High	1415	1427	PELPGESDRSAVE	19.14	2	10	18.48	18.9	5.233	52.332	0.8921	High		1379	1392	LEEKKKLEEEVSKL	26.39	2	12	26.14	26.46	2.758	22.985	0.9482	High
ULK1c+NDP52	938	947	ENIMHSQNCE	15.51	2	8	15.53	15.66	0.665	8.314	0.766	High	15.32	15.47	0.703	8.783	0.7958	High	15.45	15.74	0.666	8.327	0.8279	High	1428	1438	TADEGRVDSAM	16.26	2	9	15.08	15.72	4.78	53.113	0.9067	High		1379	1392	LEEKKKLEEEVSKL	26.39	3	12	26.14	26.47	2.743	22.856	0.9191	High
ULK1c+NDP52	947	956	EIKELKQSRE	13.93	2	8	14.04	14.54	0.696	8.706	0.9071	High	13.87	14.28	0.862	10.771	0.8909	High	14.09	14.59	0.814	10.169	0.8868	High	1428	1439	TADEGRVDSAME	15.8	2	10	15.14	15.51	5.36	53.598	0.8776	High		1393	1409	RSSSFVPSPYVATAPEL	27.78	2	12	26.97	27.37	7.28	60.67	0.9055	High
ULK1c+NDP52	947	956	EIKELKQSRE	13.93	3	8	14.11	14.44	0.689	8.617	0.8764	High	13.87	14.26	0.893	11.163	0.8844	High	14.1	14.54	0.774	9.672	0.8865	High	1443	1451	MSVQENIHM	23.12	2	7	22.82	23.1	4.819	68.849	0.7274	High		1397	1409	FVPSPYVATAPEL	26.75	2	8	26.33	26.64	4.323	54.039	0.7515	High
ULK1c+NDP52	948	956	IKELKQSRE	11.83	2	7	11.93	12.51	0.749	10.703	0.9195	High	11.74	12.32	0.896	12.804	0.9323	High	12.32	12.96	0.83	11.862	0.9358	High	1444	1451	SVQENIHM	20.22	2	6	19.64	19.96	3.736	62.265	0.7696	High		1410	1427	YGACAPELPGESDRSAVE	22.57	2	14	22.42	22.8	7.043	50.305	0.9027	High
ULK1c+NDP52	948	956	IKELKQSRE	11.83	3	7	11.98	12.54	0.775	11.075	0.8565	High	11.81	12.3	0.918	13.116	0.8854	High	12.32	12.89	0.833	11.903	0.9086	High	1452	1461	LSEEKQRIML	23.63	2	8	22.76	23.08	5.186	64.819	0.8973	High		1410	1438	YGACAPELPGESDRSAVETADEGRVDSAM	26.44	3	25	25.97	26.25	13.37	53.481	0.7843	High
ULK1c+NDP52	948	975	IKELKQSREIVLEDLKKLHVENDEKLQL	27.98	3	26	27.82	28.16	3.135	12.057	0.7362	High	27.79	28.05	3.393	13.051	0.7757	High	27.74	28.09	3.38	13.001	0.7735	High	1452	1461	LSEEKQRIML	23.63	3	8	22.76	23.05	5.188	64.844	0.8915	High		1415	1427	PELPGESDRSAVE	19.14	2	10	18.93	19.3	5.351	53.507	0.8564	High
ULK1c+NDP52	948	975	IKELKQSREIVLEDLKKLHVENDEKLQL	27.98	4	26	27.84	28.09	2.97	11.424	0.8555	High	27.77	28.11	3.101	11.928	0.8015	High	27.72	28.1	2.796	10.755	0.856	High	1452	1462	LSEEKQRIMLL	27.79	2	9	26.58	26.95	5.477	60.857	0.9255	High		1428	1438	TADEGRVDSAM	16.26	2	9	15.72	16.33	4.701	52.234	0.8805	High
ULK1c+NDP52	957	970	IVLEDLKKLHVEND	23.63	2	12	23.62	23.92	1.823	15.194	0.8577	High	23.54	23.85	1.844	15.366	0.8775	High	23.52	23.92	1.669	13.909	0.9185	High	1462	1467	LERTLQ	12.77	2	4	12.24	12.58	2.744	68.608	0.8928	High		1428	1439	TADEGRVDSAME	15.8	2	10	15.74	16.16	5.316	53.155	0.8631	High
ULK1c+NDP52	957	970	IVLEDLKKLHVEND	23.63	3	12	23.62	23.96	1.655	13.789	0.8693	High	23.54	23.87	1.775	14.795	0.8801	High	23.5	23.89	1.673	13.939	0.909	High	1462	1468	LERTLQL	23.75	2	5	23.08	23.52	3.102	62.033	0.8825	High		1443	1451	MSVQENIHM	23.12	2	7	22.78	23.14	4.469	63.839	0.7999	High
ULK1c+NDP52	957	975	IVLEDLKKLHVENDEKLQL	26.39	2	17	26.43	26.89	1.972	11.602	0.9097	High	26.35	26.73	2.192	12.895	0.931	High	26.25	26.79	1.976	11.623	0.8936	High	1462	1480	LERTLQLKEEENKRLNQRL	24.12	3	17	23.49	23.67	10.274	60.436	0.8581	High		1444	1451	SVQENIHM	20.22	2	6	19.9	20.13	3.897	64.955	0.7487	High
ULK1c+NDP52	957	975	IVLEDLKKLHVENDEKLQL	26.39	3	17	26.41	26.94	1.99	11.708	0.9382	High	26.32	26.85	2.154	12.669	0.9335	High	26.31	26.85	2.003	11.785	0.9351	High	1468	1480	LKEEENKRLNQRL	19.85	2	11	19.04	19.41	6.328	57.529	0.8695	High		1452	1461	LSEEKQRIML	23.63	2	8	23.2	23.64	5.283	66.04	0.8504	High
ULK1c+NDP52	957	975	IVLEDLKKLHVENDEKLQL	26.39	4	17	26.39	26.97	2.003	11.782	0.9171	High	26.32	26.87	2.156	12.685	0.9243	High	26.25	26.92	2.038	11.987	0.9325	High	1469	1480	KEEENKRLNQRL	18.51	2	10	17.33	17.75	5.453	54.534	0.9363	High		1452	1461	LSEEKQRIML	23.63	3	8	23.26	23.49	5.25	65.62	0.8161	High
ULK1c+NDP52	960	975	EDLKKLHVENDEKLQL	22.71	2	14	22.65	22.83	1.786	12.76	0.846	High	22.46	22.76	1.829	13.065	0.8058	High	22.46	22.82	1.734	12.382	0.9017	High	1481	1508	MSQSMSSVSSRHSEKIAIRDFQVGDLVL	33.76	3	26	33.2	33.76	7.994	30.747	0.9237	High		1452	1462	LSEEKQRIMLL	27.79	2	9	27.15	27.47	5.671	63.011	0.8978	High
ULK1c+NDP52	960	975	EDLKKLHVENDEKLQL	22.71	3	14	22.54	22.92	1.7	12.141	0.9085	High	22.47	22.85	1.848	13.198	0.9199	High	22.4	22.89	1.772	12.658	0.9062	High	1486	1506	SSVSSRHSEKIAIRDFQVGDL	29.25	3	19	28.7	28.9	5.693	29.965	0.9137	High		1462	1467	LERTLQ	12.77	2	4	12.85	12.97	2.721	68.036	0.7646	High
ULK1c+NDP52	981	990	QSLEQSHLKE	15.48	2	8	15.4	15.7	1.327	16.593	0.9349	High	15.21	15.57	1.471	18.385	0.9256	High	15.3	15.73	1.431	17.884	0.9093	High	1488	1508	VSSRHSEKIAIRDFQVGDLVL	33.73	3	19	32.99	33.21	4.478	23.567	0.8616	High		1462	1468	LERTLQL	23.75	2	5	23.83	24.02	3.147	62.946	0.8876	High
ULK1c+NDP52	981	995	QSLEQSHLKELEDTL	26.16	2	13	26.16	26.54	1.664	12.799	0.9375	High	26.09	26.46	1.763	13.565	0.9297	High	26.07	26.44	1.631	12.543	0.9424	High	1501	1508	FQVGDLVL	33.1	2	6	32.49	32.76	0.966	16.092	0.8659	High		1462	1480	LERTLQLKEEENKRLNQRL	24.12	3	17	23.75	23.95	10.788	63.46	0.8265	High
ULK1c+NDP52	989	995	KELEDTL	18.34	2	5	18.44	18.61	0.259	5.175	0.8881	High	18.29	18.45	0.315	6.306	0.9052	High	18.27	18.48	0.209	4.182	0.8748	High	1509	1520	IILDERHDNYVL	26.86	2	10	26.11	26.52	2.148	21.476	0.9484	High		1468	1480	LKEEENKRLNQRL	19.85	2	11	19.53	19.7	6.61	60.092	0.892	High
ULK1c+NDP52	996	1002	QVRHIQE	11.61	2	5	11.59	11.89	1.226	24.513	0.9156	High	11.44	11.74	1.312	26.246	0.9208	High	12	12.32	1.252	25.04	0.9245	High	1528	1535	YFLHSESL	25.95	2	6	25.25	25.76	2.217	36.947	0.8691	High		1469	1480	KEEENKRLNQRL	18.51	2	10	17.8	18.06	5.905	59.051	0.921	High
ULK1c+NDP52	1003	1014	FEKVMTDHRVSL	21.07	2	10	21.05	21.21	1.2	11.995	0.932	High	20.92	21.12	1.393	13.933	0.9338	High	20.89	21.09	1.213	12.131	0.9299	High	1529	1535	FLHSESL	22.07	2	5	21.14	21.56	1.723	34.46	0.9082	High		1481	1500	MSQSMSSVSSRHSEKIAIRD	20.92	3	18	20.71	20.97	7.662	42.567	0.9021	High
ULK1c+NDP52	1003	1014	FEKVMTDHRVSL	21.07	3	10	20.95	21.24	1.214	12.144	0.932	High	20.83	21.12	1.372	13.721	0.9336	High	20.8	21.1	1.284	12.837	0.9339	High	1529	1538	FLHSESLPAL	27.94	2	7	26.85	27.3	2.108	30.112	0.8902	High		1481	1508	MSQSMSSVSSRHSEKIAIRDFQVGDLVL	33.76	3	26	33.44	33.86	8.736	33.599	0.9295	High
ULK1c+NDP52	1003	1016	FEKVMTDHRVSLEE	20.52	3	12	20.29	20.46	1.251	10.422	0.91	High	20.14	20.35	1.479	12.324	0.9084	High	20.12	20.32	1.339	11.159	0.9047	High	1539	1556	DLKPGEGASGASRRPWVL	27.5	2	14	26.6	27.15	6.535	46.681	0.9104	High		1486	1505	SSVSSRHSEKIAIRDFQVGD	25.05	3	18	24.73	24.83	5.571	30.953	0.5925	High
ULK1c+NDP52	1004	1014	EKVMTDHRVSL	18.99	2	9	19	19.5	0.699	7.763	0.8418	High	18.82	19.38	0.79	8.78	0.7725	High	18.83	19.36	0.683	7.588	0.816	High	1539	1557	DLKPGEGASGASRRPWVLG	26.3	3	15	25.47	25.75	7.226	48.175	0.8807	High		1486	1506	SSVSSRHSEKIAIRDFQVGDL	29.25	3	19	29.01	29.26	5.995	31.554	0.8964	High
ULK1c+NDP52	1004	1014	EKVMTDHRVSL	18.99	3	9	19	19.35	0.715	7.939	0.8045	High	18.92	19.21	0.967	10.739	0.8558	High	18.86	19.18	0.695	7.721	0.8268	High	1539	1563	DLKPGEGASGASRRPWVLGKVMEKE	27.44	3	21	26.63	27.01	7.052	33.579	0.8035	High		1488	1508	VSSRHSEKIAIRDFQVGDLVL	33.73	3	19	33.2	33.5	4.696	24.715	0.9051	High
ULK1c+NDP52	1015	1027	EELKKENQQIINQ	15.58	2	11	15.68	15.97	0.414	3.765	0.9316	High	15.63	15.79	0.447	4.064	0.921	High	15.59	15.74	0.461	4.19	0.9535	High	1557	1582	GKVMEKEYCQAKKAQNRFKVPLGTKF	27.81	3	23	26.79	27.12	10.77	46.825	0.8919	High		1501	1508	FQVGDLVL	33.1	2	6	32.89	33.18	1.607	26.789	0.8766	High
ULK1c+NDP52	1016	1027	ELKKENQQIINQ	14.98	2	10	15.08	15.43	0.283	2.826	0.859	High	14.93	15.27	0.348	3.481	0.8873	High	14.98	15.36	0.319	3.186	0.9012	High	1557	1582	GKVMEKEYCQAKKAQNRFKVPLGTKF	27.81	4	23	26.73	27.15	11.479	49.909	0.9076	High		1509	1520	IILDERHDNYVL	26.86	2	10	26.65	26.94	2.257	22.573	0.9207	High
ULK1c+NDP52	1017	1027	LKKENQQIINQ	14.33	2	9	14.22	14.5	0.381	4.233	0.9628	High	14.05	14.32	0.458	5.09	0.9524	High	14.2	14.51	0.391	4.345	0.9531	High	1562	1582	KEYCQAKKAQNRFKVPLGTKF	25.82	3	18	25.39	25.64	8.911	49.503	0.8281	High		1528	1535	YFLHSESL	25.95	2	6	25.8	26.1	2.324	38.73	0.8493	High
ULK1c+NDP52	1017	1027	LKKENQQIINQ	14.33	3	9	14.33	14.51	0.322	3.577	0.8831	High	14.13	14.34	0.441	4.901	0.8998	High	14.34	14.53	0.388	4.309	0.9134	High	1564	1582	YCQAKKAQNRFKVPLGTKF	26.3	2	16	25.26	25.8	8.609	53.809	0.9011	High		1529	1535	FLHSESL	22.07	2	5	21.67	21.94	1.825	36.499	0.863	High
ULK1c+NDP52	1018	1027	KKENQQIINQ	12.67	2	8	12.5	13	0.299	3.737	0.934	High	12.5	12.83	0.327	4.09	0.9202	High	12.97	13.28	0.336	4.201	0.9217	High	1564	1582	YCQAKKAQNRFKVPLGTKF	26.3	3	16	25.26	25.66	8.734	54.587	0.9325	High		1529	1538	FLHSESLPAL	27.94	2	7	27.35	27.64	2.156	30.798	0.8798	High
ULK1c+NDP52	1028	1035	IQESHAEI	15.24	2	6	15.26	15.57	0.299	4.989	0.8678	High	15.07	15.39	0.38	6.34	0.9063	High	15.12	15.57	0.383	6.387	0.9302	High	1564	1582	YCQAKKAQNRFKVPLGTKF	26.3	4	16	25.23	25.68	9.013	56.328	0.9166	High		1539	1556	DLKPGEGASGASRRPWVL	27.5	2	14	27.32	27.55	6.983	49.881	0.9096	High
ULK1c+NDP52	1028	1045	IQESHAEIIQEKEKQLQE	19.68	2	16	19.6	20	0.701	4.381	0.8997	High	19.55	19.94	0.772	4.828	0.8762	High	19.5	19.89	0.712	4.448	0.9167	High	1567	1582	AKKAQNRFKVPLGTKF	25.77	3	13	24.89	25.29	6.694	51.491	0.8984	High		1539	1557	DLKPGEGASGASRRPWVLG	26.3	3	15	25.91	26.15	7.121	47.476	0.8259	High
ULK1c+NDP52	1028	1045	IQESHAEIIQEKEKQLQE	19.68	3	16	19.6	20.13	0.664	4.147	0.9061	High	19.47	20.03	0.882	5.513	0.8721	High	19.43	19.99	0.737	4.609	0.9432	High	1568	1582	KKAQNRFKVPLGTKF	25.67	2	12	24.95	25.02	5.364	44.7	0.8302	High		1539	1563	DLKPGEGASGASRRPWVLGKVMEKE	27.44	3	21	27.11	27.36	7.53	35.857	0.7344	High
ULK1c+NDP52	1028	1048	IQESHAEIIQEKEKQLQELKL	25.43	3	19	25.32	25.54	0.74	3.893	0.916	High	25.22	25.44	0.786	4.136	0.8566	High	25.21	25.41	0.782	4.118	0.9052	High	1568	1582	KKAQNRFKVPLGTKF	25.67	3	12	24.81	25.04	5.57	46.421	0.9216	High		1557	1582	GKVMEKEYCQAKKAQNRFKVPLGTKF	27.81	3	23	27.15	27.46	11.948	51.947	0.8636	High
ULK1c+NDP52	1028	1060	IQESHAEIIQEKEKQLQELKLKVSDLSDTRCKL	27.26	4	31	27.15	27.31	2.163	6.978	0.8758	High	27.05	27.24	2.601	8.389	0.8565	High	26.99	27.19	2.33	7.515	0.8677	High	1583	1590	YRVKAVSW	24.69	2	6	23.65	24.06	1.626	27.108	0.9022	High		1557	1582	GKVMEKEYCQAKKAQNRFKVPLGTKF	27.81	4	23	27.2	27.34	12.221	53.135	0.6392	High
ULK1c+NDP52	1034	1045	EIIQEKEKQLQE	18.09	2	10	18.14	18.62	0.341	3.414	0.951	High	18.05	18.53	0.428	4.278	0.9317	High	18.04	18.52	0.358	3.579	0.9606	High														1562	1582	KEYCQAKKAQNRFKVPLGTKF	25.82	3	18	25.57	25.88	9.761	54.225	0.8871	High
ULK1c+NDP52	1034	1045	EIIQEKEKQLQE	18.09	3	10	18.2	18.49	0.233	2.328	0.7967	High	18.13	18.36	0.381	3.813	0.789	High	18.15	18.35	0.205	2.051	0.7072	High														1564	1582	YCQAKKAQNRFKVPLGTKF	26.3	2	16	25.71	26	9.426	58.915	0.8547	High
ULK1c+NDP52	1036	1045	IQEKEKQLQE	12.89	2	8	12.9	13.11	0.327	4.088	0.855	High	12.73	12.91	0.312	3.901	0.9169	High	13.1	13.32	0.224	2.798	0.8994	High														1564	1582	YCQAKKAQNRFKVPLGTKF	26.3	3	16	25.66	26.01	9.457	59.105	0.9373	High
ULK1c+NDP52	1046	1053	LKLKVSDL	22.21	2	6	22.14	22.39	0.571	9.511	0.7994	High	22.01	22.24	0.712	11.874	0.7932	High	22.02	22.23	0.623	10.383	0.8104	High														1564	1582	YCQAKKAQNRFKVPLGTKF	26.3	4	16	25.64	26.04	9.476	59.227	0.8549	High
ULK1c+NDP52	1046	1060	LKLKVSDLSDTRCKL	23.51	3	13	23.29	23.71	1.262	9.711	0.9118	High	23.22	23.53	1.326	10.201	0.8756	High	23.2	23.59	1.197	9.205	0.8812	High														1567	1582	AKKAQNRFKVPLGTKF	25.77	3	13	25.38	25.54	7.312	56.242	0.8776	High
ULK1c+NDP52	1049	1060	KVSDLSDTRCKL	19.64	2	10	19.63	20.1	1.157	11.571	0.9252	High	19.51	20.01	1.325	13.247	0.9051	High	19.44	20.02	1.192	11.918	0.9262	High														1568	1582	KKAQNRFKVPLGTKF	25.67	2	12	25.27	25.42	6.254	52.116	0.8866	High
ULK1c+NDP52	1049	1060	KVSDLSDTRCKL	19.64	3	10	19.61	20.07	1.093	10.927	0.9088	High	19.54	20.01	1.302	13.02	0.9089	High	19.49	19.98	1.196	11.956	0.9197	High														1568	1582	KKAQNRFKVPLGTKF	25.67	3	12	25.38	25.58	6.331	52.758	0.8981	High
ULK1c+NDP52	1054	1060	SDTRCKL	14.73	2	5	14.88	15.16	0.421	8.413	0.8094	High	14.7	14.83	0.514	10.273	0.8452	High	14.88	15.31	0.414	8.286	0.8491	High														1583	1590	YRVKAVSW	24.69	2	6	24.32	24.55	1.664	27.733	0.8882	High
ULK1c+NDP52	1064	1073	LALKEAETDE	16.63	2	8	16.65	16.88	0.172	2.145	0.7703	High	16.54	16.79	0.342	4.277	0.8488	High	16.56	16.77	0.256	3.206	0.7095	High
ULK1c+NDP52	1065	1073	ALKEAETDE	11.37	2	7	11.42	11.82	0.186	2.655	0.7731	High	11.27	11.63	0.242	3.462	0.863	High	11.79	12.25	0.246	3.519	0.8955	High
ULK1c+NDP52	1074	1078	IKILL	23.93	2	3	23.95	24.06	0.022	0.745	0.8666	High	23.83	23.97	0.012	0.384	0.843	High	23.85	23.97	0.014	0.474	0.8435	High
ULK1c+NDP52	1078	1093	LEESRAQQKETLKSLL	23.68	3	14	23.57	23.91	9.495	67.82	0.8202	High	23.51	23.82	9.439	67.418	0.8294	High	23.47	23.77	9.56	68.284	0.854	High
ULK1c+NDP52	1079	1089	EESRAQQKETL	13.66	2	9	13.62	13.93	6.338	70.424	0.8948	High	13.4	13.86	6.26	69.558	0.8557	High	13.72	14.23	6.33	70.333	0.8952	High
ULK1c+NDP52	1094	1100	EQETENL	14.04	2	5	13.87	14.14	2.513	50.264	0.8338	High	13.69	13.99	2.566	51.311	0.8176	High	14.01	14.34	2.423	48.46	0.8927	High
ULK1c+NDP52	1100	1107	LRTEISKL	19.66	2	6	19.64	20.01	0.484	8.071	0.9316	High	19.51	19.93	0.563	9.381	0.8971	High	19.53	19.89	0.511	8.511	0.9162	High
ULK1c+NDP52	1101	1107	RTEISKL	17.1	2	5	17.15	17.35	0.187	3.74	0.8354	High	17.05	17.21	0.23	4.599	0.8924	High	17.06	17.25	0.227	4.543	0.8322	High
ULK1c+NDP52	1101	1116	RTEISKLNQKIQDNNE	19.08	3	14	18.97	19.29	1.389	9.924	0.7841	High	18.84	19.17	1.441	10.295	0.7271	High	18.83	19.08	1.146	8.188	0.8169	High
ULK1c+NDP52	1108	1122	NQKIQDNNENYQVGL	20.21	2	13	19.53	19.86	2.449	18.836	0.9358	High	19.43	19.78	2.518	19.365	0.9296	High	19.4	19.73	2.447	18.826	0.9232	High
ULK1c+NDP52	1130	1136	TIEKDQC	10.88	2	5	10.77	11.23	0.274	5.482	0.8175	High	10.69	11.21	0.177	3.548	0.8016	High	11.22	11.93	0.13	2.608	0.8397	High
ULK1c+NDP52	1140	1148	LISRHEEES	11.27	2	7	11.44	11.54	0.408	5.834	0.7913	High	11.25	11.46	0.264	3.775	0.8396	High	11.81	12.02	0.315	4.507	0.8579	High
ULK1c+NDP52	1140	1151	LISRHEEESNIL	20.15	2	10	20.26	20.52	0.562	5.615	0.9451	High	20.18	20.43	0.6	5.997	0.9385	High	20.11	20.44	0.533	5.331	0.9441	High
ULK1c+NDP52	1141	1151	ISRHEEESNIL	18.89	2	9	19.03	19.3	0.568	6.314	0.9251	High	18.91	19.22	0.676	7.514	0.9059	High	18.88	19.17	0.552	6.135	0.9258	High
ULK1c+NDP52	1156	1165	NKVTSLHNQA	13.37	2	8	12.86	13	3.671	45.89	0.8643	High	12.48	12.83	3.675	45.939	0.7575	High	13.03	13.27	3.613	45.165	0.9026	High
ULK1c+NDP52	1156	1166	NKVTSLHNQAF	18.6	2	9	18.69	19.06	4.201	46.678	0.8903	High	18.57	18.93	4.316	47.961	0.89	High	18.55	18.88	4.241	47.118	0.8624	High
ULK1c+NDP52	1156	1167	NKVTSLHNQAFE	18.23	2	10	18.2	18.66	4.642	46.418	0.9237	High	18.08	18.52	4.81	48.098	0.9068	High	18.08	18.49	4.667	46.666	0.8995	High
ULK1c+NDP52	1168	1179	IEKNLKEQIIEL	24.51	2	10	24.51	24.99	0.333	3.326	0.9258	High	24.4	24.89	0.344	3.436	0.9072	High	24.39	24.87	0.36	3.597	0.929	High
ULK1c+NDP52	1180	1187	QSKLDSEL	18.55	2	6	18.48	18.74	1.449	24.154	0.8276	High	18.36	18.62	1.616	26.937	0.8361	High	18.39	18.66	1.612	26.865	0.8779	High
ULK1c+NDP52	1191	1212	ERQKDEKITQQEEKYEAIIQNL	27.28	3	20	27.18	27.39	2.693	13.465	0.8239	High	27.12	27.33	2.835	14.173	0.8469	High	26.96	27.3	2.872	14.359	0.8871	High
ULK1c+NDP52	1213	1230	EKDRQKLVSSQEQDREQL	17.76	3	16	17.76	18.07	5.818	36.362	0.8789	High	17.59	17.98	6.178	38.613	0.9021	High	17.6	17.96	5.96	37.249	0.8834	High
ULK1c+NDP52	1231	1236	IQKLNC	14.82	2	4	14.84	15.13	0.707	17.684	0.8687	High	14.63	15.41	0.786	19.647	0.8602	High	14.9	15.15	0.762	19.056	0.8707	High
ULK1c+NDP52	1231	1248	IQKLNCEKDEAIQTALKE	22.01	3	16	22.33	22.57	1.735	10.841	0.7932	High	22.27	22.43	1.954	12.213	0.7575	High	22.27	22.4	1.69	10.561	0.8601	High
ULK1c+NDP52	1237	1248	EKDEAIQTALKE	18.91	2	10	18.88	19.16	1.082	10.823	0.8903	High	18.89	19.03	1.236	12.36	0.885	High	18.75	19.01	1.204	12.04	0.9016	High
ULK1c+NDP52	1242	1248	IQTALKE	14.29	2	5	14.29	14.53	0.897	17.935	0.7621	High	14.12	14.27	0.879	17.573	0.8077	High	14.37	14.69	0.963	19.255	0.8022	High
ULK1c+NDP52	1249	1254	FKLERE	17.15	2	4	17.32	17.43	1.214	30.362	0.809	High	17.04	17.46	1.251	31.279	0.8646	High	17.06	17.56	1.235	30.865	0.8757	High
ULK1c+NDP52	1249	1261	FKLEREVVEKELL	25.31	2	11	25.49	25.59	1.733	15.753	0.8799	High	25.33	25.51	2.097	19.068	0.8982	High	25.24	25.55	1.866	16.964	0.8781	High
ULK1c+NDP52	1249	1261	FKLEREVVEKELL	25.31	3	11	25.37	25.71	1.756	15.967	0.819	High	25.25	25.65	1.831	16.642	0.8366	High	25.26	25.57	1.747	15.881	0.8801	High
ULK1c+NDP52	1249	1270	FKLEREVVEKELLEKVKHLENQ	27.88	3	20	27.82	28.12	2.63	13.149	0.8831	High	27.78	27.98	2.815	14.077	0.8105	High	27.76	28	2.755	13.775	0.8498	High
ULK1c+NDP52	1249	1287	FKLEREVVEKELLEKVKHLENQIAKSPAIDSTRGDSSSL	30.44	4	36	30.44	30.54	11.509	31.97	0.751	High	30.33	30.5	11.497	31.935	0.6889	High	30.17	30.45	11.406	31.683	0.7052	High
ULK1c+NDP52	1255	1261	VVEKELL	19.55	2	5	19.38	19.78	0.177	3.539	0.8763	High	19.31	19.64	0.212	4.247	0.8951	High	19.35	19.56	0.182	3.647	0.8796	High
ULK1c+NDP52	1255	1287	VVEKELLEKVKHLENQIAKSPAIDSTRGDSSSL	28.61	4	30	28.54	28.8	10.116	33.72	0.8704	High	28.53	28.71	9.76	32.533	0.7933	High	28.47	28.73	9.905	33.016	0.8479	High
ULK1c+NDP52	1262	1270	EKVKHLENQ	10.93	2	7	10.9	11.28	0.804	11.481	0.845	High	10.82	11.12	0.989	14.131	0.8282	High	11.4	11.67	0.708	10.12	0.8414	High
ULK1c+NDP52	1262	1287	EKVKHLENQIAKSPAIDSTRGDSSSL	20.34	3	23	20.13	20.52	10.315	44.847	0.9092	High	20.02	20.45	10.021	43.57	0.9325	High	20	20.44	10.11	43.959	0.8917	High
ULK1c+NDP52	1271	1287	IAKSPAIDSTRGDSSSL	17.44	2	14	17.57	17.79	8.481	60.58	0.7467	High	17.44	17.63	8.511	60.789	0.777	High	17.46	17.65	8.37	59.787	0.829	High
ULK1c+NDP52	1271	1287	IAKSPAIDSTRGDSSSL	17.44	3	14	17.48	17.9	8.677	61.98	0.81	High	17.38	17.81	8.326	59.468	0.8629	High	17.37	17.76	8.401	60.006	0.8296	High
ULK1c+NDP52	1288	1302	VAELQEKLQEEKAKF	23.83	3	13	23.81	24.07	1.651	12.697	0.9138	High	23.72	24.02	1.949	14.99	0.9159	High	23.73	24.01	1.839	14.144	0.8792	High
ULK1c+NDP52	1291	1302	LQEKLQEEKAKF	19.35	3	10	19.29	19.59	0.947	9.474	0.9302	High	19.17	19.45	1.156	11.557	0.9125	High	19.15	19.45	0.969	9.686	0.8965	High
ULK1c+NDP52	1292	1302	QEKLQEEKAKF	17.86	2	9	17.93	18.3	0.863	9.592	0.9455	High	17.83	18.23	0.986	10.957	0.9543	High	17.84	18.2	0.861	9.568	0.9484	High
ULK1c+NDP52	1292	1302	QEKLQEEKAKF	17.86	3	9	17.99	18.31	0.862	9.574	0.94	High	17.88	18.19	1.049	11.656	0.9184	High	17.86	18.16	0.893	9.927	0.9419	High
ULK1c+NDP52	1303	1324	LEQLEEQEKRKNEEMQNVRTSL	22.14	3	20	22.1	22.23	8.386	41.929	0.8714	High	21.97	22.22	8.405	42.026	0.8374	High	21.93	22.18	8.554	42.771	0.8258	High
ULK1c+NDP52	1306	1319	LEEQEKRKNEEMQN	11.83	2	12	11.56	11.87	3.588	29.902	0.7985	High	11.48	11.75	3.461	28.841	0.7228	High	12.04	12.22	3.522	29.349	0.8553	High
ULK1c+NDP52	1306	1324	LEEQEKRKNEEMQNVRTSL	19.88	3	17	19.75	19.97	7.363	43.313	0.7663	High	19.68	19.84	7.387	43.456	0.7578	High	19.62	19.8	7.307	42.982	0.6807	High
ULK1c+NDP52	1307	1318	EEQEKRKNEEMQ	10.81	2	10	10.58	10.68	3.077	30.771	0.7758	High	10.45	10.73	3.308	33.081	0.8548	High	11.04	11.26	3.102	31.016	0.8083	High
ULK1c+NDP52	1307	1324	EEQEKRKNEEMQNVRTSL	19.21	3	16	19.12	19.47	6.905	43.156	0.9084	High	19.02	19.34	7.302	45.635	0.9147	High	19	19.35	7.114	44.46	0.9278	High
ULK1c+NDP52	1319	1324	NVRTSL	15.26	2	4	15.31	15.63	3.21	80.258	0.8748	High	15.12	15.46	3.235	80.878	0.8772	High	15.3	15.69	3.204	80.106	0.8627	High
ULK1c+NDP52	1337	1349	TREKMRKENIIND	16.62	2	11	16.69	16.86	4.768	43.349	0.7948	High	16.54	16.84	4.862	44.202	0.865	High	16.54	16.84	4.798	43.621	0.7659	High
ULK1c+NDP52	1337	1354	TREKMRKENIINDLSDKL	25.67	3	16	25.63	25.77	3.512	21.947	0.8449	High	25.52	25.77	3.638	22.735	0.8459	High	25.56	25.73	3.597	22.479	0.8606	High
ULK1c+NDP52	1337	1358	TREKMRKENIINDLSDKLKSTM	28.01	4	20	27.72	27.83	4.276	21.379	0.7789	High	27.63	27.74	4.33	21.649	0.7411	High	27.5	27.79	4.604	23.019	0.7702	High
ULK1c+NDP52	1337	1366	TREKMRKENIINDLSDKLKSTMQQQERDKD	27.72	4	28	27.36	27.89	5.948	21.241	0.9219	High	27.28	27.75	6.356	22.701	0.9164	High	27.31	27.76	6	21.429	0.9213	High
ULK1c+NDP52	1337	1369	TREKMRKENIINDLSDKLKSTMQQQERDKDLIE	28.78	3	31	28.7	29.13	6.001	19.358	0.908	High	28.62	29.04	6.485	20.919	0.8997	High	28.59	29.07	6.165	19.888	0.904	High
ULK1c+NDP52	1337	1369	TREKMRKENIINDLSDKLKSTMQQQERDKDLIE	28.78	4	31	28.69	29.16	5.848	18.864	0.9494	High	28.57	29.12	6.239	20.125	0.9337	High	28.61	29.12	5.855	18.886	0.9473	High
ULK1c+NDP52	1337	1369	TREKMRKENIINDLSDKLKSTMQQQERDKDLIE	28.78	5	31	28.66	29.13	5.758	18.575	0.9491	High	28.62	29.08	6.179	19.933	0.9246	High	28.61	29.07	5.821	18.778	0.9483	High
ULK1c+NDP52	1337	1371	TREKMRKENIINDLSDKLKSTMQQQERDKDLIESL	30.86	4	33	30.62	30.83	6.011	18.214	0.7591	High	30.55	30.79	6.366	19.292	0.6139	High	30.57	30.75	6.193	18.766	0.619	High
ULK1c+NDP52	1350	1366	LSDKLKSTMQQQERDKD	18.13	2	15	17.95	18.31	2.31	15.399	0.8955	High	17.88	18.1	2.57	17.137	0.8182	High	17.85	18.19	2.16	14.397	0.7956	High
ULK1c+NDP52	1350	1366	LSDKLKSTMQQQERDKD	18.13	3	15	17.89	18.31	2.184	14.56	0.9203	High	17.83	18.3	2.422	16.149	0.9003	High	17.82	18.17	2.292	15.281	0.892	High
ULK1c+NDP52	1350	1369	LSDKLKSTMQQQERDKDLIE	21.74	2	18	21.51	21.75	2.277	12.653	0.8297	High	21.38	21.69	2.502	13.902	0.8412	High	21.34	21.63	2.259	12.55	0.8465	High
ULK1c+NDP52	1350	1369	LSDKLKSTMQQQERDKDLIE	21.74	3	18	21.54	21.7	2.332	12.956	0.894	High	21.42	21.6	2.623	14.571	0.8923	High	21.38	21.54	2.4	13.333	0.8884	High
ULK1c+NDP52	1350	1369	LSDKLKSTMQQQERDKDLIE	21.74	4	18	21.52	21.68	2.311	12.838	0.8864	High	21.5	21.61	2.544	14.131	0.7709	High	21.42	21.49	2.297	12.764	0.8759	High
ULK1c+NDP52	1350	1371	LSDKLKSTMQQQERDKDLIESL	26.37	3	20	26.09	26.35	2.132	10.662	0.8908	High	26.04	26.24	2.307	11.535	0.905	High	26	26.26	2.315	11.573	0.8788	High
ULK1c+NDP52	1351	1369	SDKLKSTMQQQERDKDLIE	20.39	3	17	20.35	20.56	2.243	13.193	0.846	High	20.23	20.45	2.354	13.849	0.9145	High	20.2	20.45	2.279	13.404	0.8541	High
ULK1c+NDP52	1370	1378	SLSEDRARL	18.32	2	7	18.12	18.53	0.316	4.511	0.9378	High	17.96	18.13	0.308	4.395	0.9582	High	17.95	18.35	0.254	3.635	0.9527	High
ULK1c+NDP52	1370	1392	SLSEDRARLLEEKKKLEEEVSKL	28.93	3	21	28.96	29.28	0.926	4.409	0.9482	High	28.88	29.21	1.032	4.915	0.9562	High	28.88	29.18	0.957	4.556	0.9537	High
ULK1c+NDP52	1370	1392	SLSEDRARLLEEKKKLEEEVSKL	28.93	4	21	28.96	29.26	0.976	4.648	0.9368	High	28.9	29.19	1.111	5.292	0.927	High	28.87	29.19	0.995	4.736	0.9409	High
ULK1c+NDP52	1370	1392	SLSEDRARLLEEKKKLEEEVSKL	28.93	5	21	28.95	29.24	1.027	4.892	0.9261	High	28.87	29.19	1.037	4.939	0.8422	High	28.85	29.28	1.052	5.009	0.9002	High
ULK1c+NDP52	1372	1392	SEDRARLLEEKKKLEEEVSKL	26.93	3	19	26.73	27.06	0.871	4.586	0.8391	High	26.63	26.95	0.952	5.012	0.778	High	26.65	26.79	1.127	5.932	0.8682	High
ULK1c+NDP52	1379	1387	LEEKKKLEE	12.36	2	7	12.57	12.58	0.09	1.282	0.8349	High	12.28	12.77	0.048	0.684	0.8829	High	12.76	13.18	0.096	1.377	0.8972	High
ULK1c+NDP52	1379	1388	LEEKKKLEEE	13.44	2	8	13.62	13.74	0.064	0.804	0.9174	High	13.36	13.64	0.083	1.039	0.9069	High	13.63	13.99	0.095	1.183	0.9061	High
ULK1c+NDP52	1379	1392	LEEKKKLEEEVSKL	23.4	2	12	23.13	23.45	0.87	7.248	0.9403	High	23.15	23.38	0.972	8.099	0.9528	High	23.05	23.31	0.956	7.967	0.9476	High
ULK1c+NDP52	1379	1392	LEEKKKLEEEVSKL	23.4	3	12	23.11	23.62	0.891	7.427	0.9433	High	23.05	23.54	0.968	8.067	0.9375	High	23	23.56	0.897	7.475	0.9397	High
ULK1c+NDP52	1379	1392	LEEKKKLEEEVSKL	23.4	4	12	23.23	23.33	1.109	9.244	0.819	High	23.15	23.33	0.988	8.235	0.7427	High	23.09	23.32	0.922	7.683	0.7778	High
ULK1c+NDP52	1379	1397	LEEKKKLEEEVSKLRSSSF	25.51	3	17	25.45	25.63	4.461	26.241	0.8334	High	25.36	25.6	4.414	25.962	0.786	High	25.34	25.61	4.341	25.537	0.7736	High
ULK1c+NDP52	1379	1409	LEEKKKLEEEVSKLRSSSFVPSPYVATAPEL	27.42	3	26	27.17	27.79	10.822	41.623	0.9191	High	27.12	27.68	10.813	41.587	0.9076	High	26.99	27.68	10.682	41.086	0.9069	High
ULK1c+NDP52	1379	1409	LEEKKKLEEEVSKLRSSSFVPSPYVATAPEL	27.42	4	26	27.17	27.65	10.616	40.833	0.8914	High	27.14	27.57	10.669	41.034	0.8738	High	27.1	27.59	10.63	40.885	0.8767	High
ULK1c+NDP52	1393	1409	RSSSFVPSPYVATAPEL	24.86	2	12	24.05	24.31	8.232	68.6	0.9196	High	23.93	24.27	7.98	66.501	0.9118	High	23.94	24.26	8.143	67.862	0.9217	High
ULK1c+NDP52	1398	1409	VPSPYVATAPEL	21.71	2	8	21.69	22.04	5.481	68.518	0.8707	High	21.56	21.91	5.325	66.558	0.8725	High	21.58	21.93	5.389	67.366	0.8775	High
ULK1c+NDP52	1410	1427	YGACAPELPGESDRSAVE	20.2	2	14	20.32	20.75	8.062	57.587	0.9285	High	20.14	20.78	7.733	55.236	0.9274	High	20.14	20.75	7.85	56.074	0.9294	High
ULK1c+NDP52	1410	1438	YGACAPELPGESDRSAVETADEGRVDSAM	23.38	3	25	23.13	23.63	14.915	59.659	0.8544	High	23.05	23.48	14.472	57.887	0.8742	High	23.03	23.5	14.567	58.267	0.8952	High
ULK1c+NDP52	1415	1427	PELPGESDRSAVE	17.43	2	10	17.47	17.96	5.89	58.905	0.8778	High	17.37	17.77	5.784	57.843	0.9089	High	17.4	17.75	5.824	58.238	0.8519	High
ULK1c+NDP52	1428	1438	TADEGRVDSAM	14.89	2	9	14.97	15.4	5.259	58.431	0.9135	High	14.78	15.32	5.06	56.223	0.9193	High	14.99	15.34	5.174	57.49	0.9139	High
ULK1c+NDP52	1428	1439	TADEGRVDSAME	14.95	2	10	14.92	15.34	5.873	58.726	0.8912	High	14.71	15.23	5.65	56.502	0.8838	High	14.87	15.37	5.761	57.608	0.8728	High
ULK1c+NDP52	1443	1451	MSVQENIHM	20.65	2	7	20.69	21.01	5.204	74.337	0.8643	High	20.56	21.04	5.132	73.31	0.8249	High	20.54	21.01	5.12	73.149	0.8571	High
ULK1c+NDP52	1443	1461	MSVQENIHMLSEEKQRIML	27.66	3	17	27.43	27.71	11.216	65.976	0.9023	High	27.36	27.69	11.354	66.786	0.8904	High	27.32	27.63	11.258	66.221	0.8731	High
ULK1c+NDP52	1443	1480	MSVQENIHMLSEEKQRIMLLERTLQLKEEENKRLNQRL	29.53	5	36	29.23	29.53	13.386	37.185	0.8597	High	29.24	29.4	13.557	37.659	0.8558	High	29.22	29.38	13.299	36.942	0.8494	High
ULK1c+NDP52	1444	1451	SVQENIHM	18.47	2	6	18.35	18.59	4.367	72.777	0.8559	High	18.23	18.41	4.432	73.865	0.8242	High	18.17	18.48	4.338	72.296	0.8256	High
ULK1c+NDP52	1452	1461	LSEEKQRIML	20.87	2	8	20.95	21.2	3.657	45.707	0.9311	High	20.81	21.13	3.704	46.303	0.9291	High	20.81	21.06	3.625	45.314	0.9318	High
ULK1c+NDP52	1452	1461	LSEEKQRIML	20.87	3	8	20.85	21.34	3.678	45.974	0.868	High	20.77	21.23	3.741	46.767	0.897	High	20.73	21.2	3.694	46.17	0.8459	High
ULK1c+NDP52	1452	1462	LSEEKQRIMLL	24.23	2	9	24.17	24.57	3.491	38.79	0.9167	High	24.03	24.44	3.611	40.123	0.9259	High	24.06	24.44	3.465	38.498	0.9186	High
ULK1c+NDP52	1452	1462	LSEEKQRIMLL	24.23	3	9	24.2	24.72	3.751	41.681	0.8343	High	24.08	24.41	3.769	41.879	0.8149	High	24.1	24.43	3.491	38.787	0.85	High
ULK1c+NDP52	1462	1467	LERTLQ	12.94	2	4	12.48	12.67	0.412	10.307	0.9113	High	12.23	12.5	0.438	10.96	0.8851	High	12.77	12.98	0.382	9.546	0.9134	High
ULK1c+NDP52	1462	1468	LERTLQL	21.16	2	5	21.2	21.4	0.519	10.379	0.9242	High	21.1	21.34	0.573	11.456	0.8935	High	21.03	21.28	0.521	10.428	0.9365	High
ULK1c+NDP52	1462	1480	LERTLQLKEEENKRLNQRL	21.25	3	17	21.16	21.32	2.449	14.408	0.8935	High	21.01	21.24	2.814	16.555	0.901	High	21.01	21.21	2.581	15.182	0.8729	High
ULK1c+NDP52	1462	1480	LERTLQLKEEENKRLNQRL	21.25	4	17	21.14	21.32	2.625	15.442	0.8629	High	21.11	21.34	2.99	17.586	0.889	High	21.06	21.32	2.78	16.353	0.8717	High
ULK1c+NDP52	1468	1480	LKEEENKRLNQRL	17.83	2	11	17.7	17.92	2.193	19.94	0.9085	High	17.85	17.98	2.41	21.908	0.8171	High	17.57	18.01	2.125	19.317	0.9057	High
ULK1c+NDP52	1468	1480	LKEEENKRLNQRL	17.83	3	11	17.58	18.25	2.175	19.774	0.9173	High	17.92	18.14	2.228	20.251	0.9061	High	17.53	18.07	2.202	20.018	0.9112	High
ULK1c+NDP52	1468	1480	LKEEENKRLNQRL	17.83	4	11	17.77	18	2.247	20.425	0.8746	High	17.76	17.98	2.264	20.582	0.8437	High	17.63	17.9	2.283	20.751	0.8746	High
ULK1c+NDP52	1469	1480	KEEENKRLNQRL	16.45	2	10	16.47	16.79	1.96	19.597	0.9162	High	16.54	16.68	2.048	20.483	0.8695	High	16.33	16.68	1.985	19.855	0.9073	High
ULK1c+NDP52	1481	1500	MSQSMSSVSSRHSEKIAIRD	18.9	3	18	18.93	19.18	7.634	42.412	0.8806	High	18.8	18.97	7.534	41.853	0.8771	High	18.72	18.92	7.532	41.847	0.9013	High
ULK1c+NDP52	1481	1506	MSQSMSSVSSRHSEKIAIRDFQVGDL	26.07	3	24	26.24	26.42	7.902	32.926	0.8324	High	26.12	26.31	7.89	32.874	0.8695	High	26.1	26.34	7.936	33.065	0.7774	High
ULK1c+NDP52	1481	1508	MSQSMSSVSSRHSEKIAIRDFQVGDLVL	29.29	3	26	29.25	29.67	7.515	28.902	0.9279	High	29.19	29.55	7.472	28.739	0.932	High	29.13	29.64	7.23	27.806	0.9336	High
ULK1c+NDP52	1486	1505	SSVSSRHSEKIAIRDFQVGD	21.99	3	18	21.96	22.37	4.883	27.129	0.8742	High	21.88	22.31	4.785	26.584	0.8711	High	21.84	22.28	4.731	26.281	0.9055	High
ULK1c+NDP52	1486	1506	SSVSSRHSEKIAIRDFQVGDL	25.58	3	19	25.55	25.93	4.792	25.222	0.9097	High	25.47	25.8	4.712	24.802	0.9297	High	25.37	25.86	4.687	24.666	0.9035	High
ULK1c+NDP52	1486	1508	SSVSSRHSEKIAIRDFQVGDLVL	29.1	4	21	28.99	29.48	4.673	22.251	0.9011	High	29.01	29.36	4.724	22.496	0.93	High	28.9	29.29	4.621	22.006	0.9321	High
ULK1c+NDP52	1501	1508	FQVGDLVL	29.17	2	6	29.03	29.24	1.078	17.975	0.8005	High	28.89	29.2	1.046	17.429	0.8666	High	28.87	29.22	1.038	17.305	0.8372	High
ULK1c+NDP52	1509	1520	IILDERHDNYVL	23.79	2	10	23.7	24.25	1.519	15.194	0.9509	High	23.63	24.18	1.57	15.698	0.9502	High	23.6	24.18	1.516	15.157	0.9524	High
ULK1c+NDP52	1509	1520	IILDERHDNYVL	23.79	3	10	23.72	24.23	1.561	15.606	0.9133	High	23.62	24.15	1.577	15.766	0.9249	High	23.6	24.1	1.519	15.195	0.9218	High
ULK1c+NDP52	1509	1521	IILDERHDNYVLF	27.75	2	11	27.55	27.99	1.516	13.778	0.8059	High	27.46	27.87	1.387	12.608	0.8699	High	27.44	27.78	1.443	13.119	0.8129	High
ULK1c+NDP52	1528	1535	YFLHSESL	23	2	6	22.98	23.21	0.935	15.589	0.9047	High	22.89	23.08	1.044	17.398	0.9138	High	22.83	23.09	0.912	15.203	0.8968	High
ULK1c+NDP52	1528	1538	YFLHSESLPAL	26.54	2	8	26.59	26.78	0.949	11.867	0.8761	High	26.52	26.69	0.996	12.447	0.8865	High	26.45	26.67	0.975	12.184	0.8432	High
ULK1c+NDP52	1529	1538	FLHSESLPAL	24.49	2	7	24.38	25	1.055	15.07	0.9267	High	24.27	24.87	1.087	15.528	0.9233	High	24.25	24.88	1.088	15.548	0.9414	High
ULK1c+NDP52	1539	1556	DLKPGEGASGASRRPWVL	24.21	2	14	24.18	24.72	6.749	48.205	0.921	High	24.02	24.39	6.567	46.905	0.9029	High	24.06	24.61	6.62	47.286	0.9326	High
ULK1c+NDP52	1539	1556	DLKPGEGASGASRRPWVL	24.21	3	14	24.15	24.86	6.899	49.277	0.9227	High	24.07	24.67	6.671	47.652	0.9271	High	23.98	24.84	6.76	48.289	0.9223	High
ULK1c+NDP52	1539	1556	DLKPGEGASGASRRPWVL	24.21	4	14	24.31	24.6	7.008	50.056	0.8713	High	24.27	24.54	6.711	47.934	0.7909	High	24.17	24.57	7.026	50.183	0.8567	High
ULK1c+NDP52	1539	1561	DLKPGEGASGASRRPWVLGKVME	24.67	3	19	24.74	25.02	6.826	35.924	0.8834	High	24.69	24.94	6.589	34.68	0.8598	High	24.64	24.97	6.516	34.292	0.8757	High
ULK1c+NDP52	1557	1582	GKVMEKEYCQAKKAQNRFKVPLGTKF	24	3	23	23.88	24.29	10.913	47.447	0.8853	High	23.78	24.2	10.762	46.79	0.8848	High	23.73	24.19	10.751	46.745	0.8836	High
ULK1c+NDP52	1557	1582	GKVMEKEYCQAKKAQNRFKVPLGTKF	24	4	23	23.87	24.31	11.303	49.145	0.9163	High	23.78	24.17	11.359	49.388	0.9112	High	23.73	24.25	11.15	48.479	0.9163	High
ULK1c+NDP52	1557	1582	GKVMEKEYCQAKKAQNRFKVPLGTKF	24	5	23	23.88	24.24	11.443	49.752	0.8736	High	23.8	24.14	11.258	48.948	0.8554	High	23.77	24.14	11.515	50.066	0.8827	High
ULK1c+NDP52	1562	1582	KEYCQAKKAQNRFKVPLGTKF	22.66	3	18	22.65	22.94	9.34	51.89	0.8778	High	22.49	22.67	9.219	51.219	0.8987	High	22.49	22.83	9.252	51.402	0.9043	High
ULK1c+NDP52	1562	1582	KEYCQAKKAQNRFKVPLGTKF	22.66	4	18	22.56	23.07	9.653	53.629	0.8753	High	22.47	22.92	9.459	52.551	0.9047	High	22.47	22.92	9.554	53.078	0.9071	High
ULK1c+NDP52	1564	1582	YCQAKKAQNRFKVPLGTKF	22.64	2	16	22.69	23.11	9.016	56.35	0.9051	High	22.59	22.96	8.856	55.351	0.8843	High	22.63	23.02	8.886	55.535	0.9078	High
ULK1c+NDP52	1564	1582	YCQAKKAQNRFKVPLGTKF	22.64	3	16	22.7	23.05	8.957	55.982	0.9314	High	22.63	22.97	8.782	54.885	0.9	High	22.61	22.93	8.815	55.091	0.9341	High
ULK1c+NDP52	1564	1582	YCQAKKAQNRFKVPLGTKF	22.64	4	16	22.66	23.21	8.966	56.038	0.9077	High	22.54	23.15	8.901	55.628	0.9273	High	22.56	23.14	8.774	54.839	0.9281	High
ULK1c+NDP52	1566	1582	QAKKAQNRFKVPLGTKF	22.54	3	14	22.46	22.75	7.113	50.806	0.8669	High	22.34	22.76	7.215	51.534	0.8282	High	22.31	22.62	7.204	51.457	0.8377	High
ULK1c+NDP52	1568	1582	KKAQNRFKVPLGTKF	22.45	4	12	22.6	22.66	6.445	53.711	0.7695	High	22.31	22.6	6.172	51.437	0.8266	High	22.28	22.56	6.172	51.436	0.8167	High
ULK1c+NDP52	1583	1590	YRVKAVSW	21.89	2	6	21.68	22.16	1.43	23.827	0.8146	High	21.62	22.13	1.511	25.178	0.8671	High	21.71	21.74	1.52	25.334	0.865	High
ULK1c+NDP52	1583	1598	YRVKAVSWNKKVPGAS	19.5	2	13	19.48	19.99	5.687	43.746	0.859	High	19.39	19.74	5.673	43.637	0.8501	High	19.33	19.71	5.636	43.352	0.8182	High
ULK1c+NDP52	1583	1598	YRVKAVSWNKKVPGAS	19.5	3	13	19.45	19.68	5.916	45.504	0.9195	High	19.35	19.58	5.86	45.076	0.8902	High	19.28	19.55	5.904	45.417	0.8897	High
ULK1c+NDP52	1583	1598	YRVKAVSWNKKVPGAS	19.5	4	13	19.53	19.88	6.085	46.808	0.8644	High	19.43	19.75	6.009	46.226	0.8907	High	19.4	19.75	6.046	46.508	0.8749	High
ULK1c+NDP52	1583	1599	YRVKAVSWNKKVPGASM	21.29	3	14	21.12	21.38	6.543	46.733	0.9092	High	21.01	21.32	6.466	46.189	0.9127	High	20.99	21.26	6.416	45.829	0.9192	High
ULK1c+NDP52	1583	1599	YRVKAVSWNKKVPGASM	21.29	4	14	21.14	21.63	6.685	47.747	0.8716	High	21.08	21.61	6.586	47.045	0.8726	High	21.05	21.58	6.572	46.945	0.8524	High
ULK1c+NDP52	1583	1606	YRVKAVSWNKKVPGASMKIEEGKL	23.64	3	21	23.48	23.76	9.141	43.53	0.7789	High	23.41	23.56	9.003	42.873	0.8171	High	23.37	23.61	8.943	42.584	0.7955	High
[truncated: 54 more columns]

## Sheet: HDX summary(ULK1c vs FIP200)
Data Set	FIP200-MBP	FIP200-MBP/ATG13/ATG101/ULK1
HDX reaction details	20 mM HEPES pH 8.0, 200mM NaCl, 1mM Maltose, 1mM TCEP, 30 °C	20 mM HEPES pH 8.0, 200mM NaCl, 1mM Maltose, 1mM TCEP, 30 °C
HDX time course (s)	60	60
# of Peptides	368	368
Sequence coverage	0.93	0.93
Average peptide length / Redundancy	15.4 / 3.6	15.4 / 3.6
Replicates (biological or technical)	3 (technical)	4 (technical)
Repeatability	0.062 (average standard deviation)	0.051 (average standard deviation)

## Sheet: uptake summary(ULK1c vs FIP200)
					repeat 1	60s	FIP200-MBP											repeat 1	60s	FIP200-MBP/ATG13/ATG101/ULK1											repeat 2	60s	FIP200-MBP											repeat 2	60s	FIP200-MBP/ATG13/ATG101/ULK1
Start	End	Sequence	Search RT	Charge	Max D	Start RT	End RT	#D	%D	Score	Conf		Start	End	Sequence	Search RT	Charge	Max D	Start RT	End RT	#D	%D	Score	Conf		Start	End	Sequence	Search RT	Charge	Max D	Start RT	End RT	#D	%D	Score	Conf		Start	End	Sequence	Search RT	Charge	Max D	Start RT	End RT	#D	%D	Score
1	6	GGTMKL	13.53	2	4	11.83	12.12	2.883	72.08	0.7893	High		1	6	GGTMKL	13.53	2	4	11.92	12.19	2.927	73.184	0.7968	High		7	16	LVNTGTTLTF	26.71	2	8	25.84	26.26	2.23	27.874	0.8555	High		7	16	LVNTGTTLTF	26.71	2	8	25.85	26.26	2.178	27.225	0.9083
23	48	LTVQTVADLKHAIQSKYKIAIQHQVL	15.66	3	24	15.35	15.77	6.194	25.808	0.9321	High		23	48	LTVQTVADLKHAIQSKYKIAIQHQVL	15.66	3	24	15.36	15.76	6.257	26.07	0.9326	High		17	45	DTELTVQTVADLKHAIQSKYKIAIQHQVL	34.5	3	27	34.18	34.31	8.853	32.79	0.4274	High		17	45	DTELTVQTVADLKHAIQSKYKIAIQHQVL	34.5	3	27	34.12	34.25	8.69	32.185	0.7329
23	48	LTVQTVADLKHAIQSKYKIAIQHQVL	15.66	4	24	15.41	15.78	6.316	26.318	0.9083	High		23	48	LTVQTVADLKHAIQSKYKIAIQHQVL	15.66	4	24	15.38	15.75	6.388	26.619	0.9176	High		20	45	LTVQTVADLKHAIQSKYKIAIQHQVL	32.73	3	24	32.24	32.71	6.302	26.258	0.9335	High		20	45	LTVQTVADLKHAIQSKYKIAIQHQVL	32.73	3	24	32.21	32.63	6.242	26.009	0.925
24	48	TVQTVADLKHAIQSKYKIAIQHQVL	14.95	2	23	14.99	15.21	4.925	21.413	0.905	High		24	48	TVQTVADLKHAIQSKYKIAIQHQVL	14.95	2	23	14.93	15.12	5.037	21.9	0.8942	High		20	45	LTVQTVADLKHAIQSKYKIAIQHQVL	32.73	4	24	32.31	32.62	6.579	27.414	0.9388	High		20	45	LTVQTVADLKHAIQSKYKIAIQHQVL	32.73	4	24	32.27	32.51	6.499	27.079	0.9323
24	48	TVQTVADLKHAIQSKYKIAIQHQVL	14.95	3	23	14.98	15.26	5.01	21.783	0.9396	High		24	48	TVQTVADLKHAIQSKYKIAIQHQVL	14.95	3	23	14.88	15.31	5.089	22.125	0.9394	High		20	45	LTVQTVADLKHAIQSKYKIAIQHQVL	32.73	5	24	32.35	32.55	6.598	27.491	0.9037	High		20	45	LTVQTVADLKHAIQSKYKIAIQHQVL	32.73	5	24	32.25	32.62	6.44	26.833	0.8827
24	48	TVQTVADLKHAIQSKYKIAIQHQVL	14.95	4	23	14.92	15.26	5.165	22.457	0.9427	High		24	48	TVQTVADLKHAIQSKYKIAIQHQVL	14.95	4	23	14.91	15.32	5.189	22.56	0.9444	High		21	45	TVQTVADLKHAIQSKYKIAIQHQVL	30.67	2	23	30.82	31	5.085	22.111	0.8992	High		21	45	TVQTVADLKHAIQSKYKIAIQHQVL	30.67	2	23	30.67	30.96	5.04	21.914	0.9156
76	80	LFNKE	11.36	2	3	10.78	11	0.058	1.925	0.7714	High		76	80	LFNKE	11.36	2	3	10.88	11.02	0.044	1.465	0.7569	High		21	45	TVQTVADLKHAIQSKYKIAIQHQVL	30.67	3	23	30.65	31.16	5.31	23.089	0.938	High		21	45	TVQTVADLKHAIQSKYKIAIQHQVL	30.67	3	23	30.6	31.14	5.214	22.672	0.9425
76	83	LFNKEMIL	15.28	2	6	14.86	15.23	2.135	35.586	0.7419	High		76	83	LFNKEMIL	15.28	2	6	14.91	15.25	0.267	4.453	0.82	High		21	45	TVQTVADLKHAIQSKYKIAIQHQVL	30.67	4	23	30.7	31.13	5.516	23.981	0.9459	High		21	45	TVQTVADLKHAIQSKYKIAIQHQVL	30.67	4	23	30.68	31.11	5.4	23.479	0.9051
77	83	FNKEMIL	14.02	2	5	13.93	14.33	1.951	39.027	0.8447	High		77	83	FNKEMIL	14.02	2	5	13.95	14.27	0.403	8.057	0.9014	High		21	45	TVQTVADLKHAIQSKYKIAIQHQVL	30.67	5	23	30.76	31.05	5.635	24.499	0.8958	High		21	45	TVQTVADLKHAIQSKYKIAIQHQVL	30.67	5	23	30.67	31.07	5.491	23.874	0.8897
84	95	CDRPPAIPKTTF	12.88	2	7	12.73	12.95	4.7	67.14	0.9201	High		84	95	CDRPPAIPKTTF	12.88	2	7	12.73	13.07	4.719	67.411	0.8916	High		28	45	LKHAIQSKYKIAIQHQVL	24.86	3	16	24.82	25.07	3.842	24.013	0.8631	High		28	45	LKHAIQSKYKIAIQHQVL	24.86	3	16	24.69	25.01	3.951	24.694	0.7491
84	100	CDRPPAIPKTTFSTEND	12.41	2	12	12.19	12.38	7.744	64.533	0.6831	High		84	100	CDRPPAIPKTTFSTEND	12.41	2	12	12.19	12.41	7.742	64.515	0.7067	High		37	45	KIAIQHQVL	21.87	2	7	21.14	21.52	3.278	46.829	0.7866	High		37	45	KIAIQHQVL	21.87	2	7	21.04	21.41	3.211	45.87	0.8205
84	102	CDRPPAIPKTTFSTENDME	13.07	2	14	12.71	13.05	9.028	64.483	0.8358	High		84	102	CDRPPAIPKTTFSTENDME	13.07	2	14	12.7	13.1	9.067	64.766	0.868	High		54	61	AADRRVCT	10.96	2	6	10.82	11.11	3.463	57.711	0.8181	High		54	61	AADRRVCT	10.96	2	6	10.81	11.18	3.42	57.007	0.8258
85	95	DRPPAIPKTTF	12.75	2	6	12.55	12.93	4.139	68.98	0.8851	High		85	95	DRPPAIPKTTF	12.75	2	6	12.57	12.97	4.22	70.331	0.7225	High		54	73	AADRRVCTYSAGTDTNPIFL	28.62	2	17	28.22	28.55	6.87	40.414	0.8909	High		54	73	AADRRVCTYSAGTDTNPIFL	28.62	2	17	28.19	28.61	7.096	41.742	0.9004
109	124	LMMPAVFHTVASRTQL	15.96	2	13	15.65	15.82	8.626	66.35	0.6135	High		109	124	LMMPAVFHTVASRTQL	15.96	2	13	15.63	15.8	8.722	67.091	0.5857	High		62	72	YSAGTDTNPIF	24.34	2	8	24.27	24.4	1.906	23.825	0.9076	High		62	72	YSAGTDTNPIF	24.34	2	8	24.23	24.51	1.959	24.482	0.8815
112	124	PAVFHTVASRTQL	13.07	2	11	12.88	13.27	6.386	58.053	0.8182	High		112	124	PAVFHTVASRTQL	13.07	2	11	12.91	13.21	6.472	58.832	0.8422	High		62	73	YSAGTDTNPIFL	27.48	2	9	27.51	28.12	2.072	23.023	0.8549	High		62	73	YSAGTDTNPIFL	27.48	2	9	27.52	28.12	2.173	24.149	0.8506
116	124	HTVASRTQL	10.92	2	7	10.72	11.26	3.638	51.968	0.9035	High		116	124	HTVASRTQL	10.92	2	7	10.74	11.18	3.693	52.755	0.8946	High		73	77	LFNKE	14.24	2	3	14.15	14.44	0.054	1.791	0.839	High		73	77	LFNKE	14.24	2	3	14.18	14.4	0.109	3.618	0.8804
116	125	HTVASRTQLA	10.73	2	8	10.52	10.66	3.71	46.379	0.6715	High		116	125	HTVASRTQLA	10.73	2	8	10.51	10.6	3.732	46.653	0.5819	High		73	80	LFNKEMIL	28.92	2	6	28.66	28.97	2.226	37.1	0.825	High		73	80	LFNKEMIL	28.92	2	6	28.63	29.04	0.386	6.439	0.8897
128	138	MYEVAKKLCSF	14.87	2	9	14.66	15.04	0.725	8.052	0.8762	High		128	138	MYEVAKKLCSF	14.87	2	9	14.65	15.05	0.677	7.525	0.8566	High		74	80	FNKEMIL	25.33	2	5	25.43	25.73	2.072	41.443	0.8664	High		74	80	FNKEMIL	25.33	2	5	25.26	25.81	0.442	8.838	0.909
129	138	YEVAKKLCSF	13.83	2	8	13.71	14.13	0.834	10.422	0.9219	High		129	138	YEVAKKLCSF	13.83	2	8	13.72	14.09	0.819	10.232	0.9273	High		81	92	CDRPPAIPKTTF	23.39	2	7	22.77	23.28	4.058	57.972	0.8676	High		81	92	CDRPPAIPKTTF	23.39	2	7	22.77	23.15	4.27	61.004	0.8863
139	153	CEGLVHDEHLQHQGW	13.42	2	13	13.25	13.72	0.667	5.132	0.9321	High		139	153	CEGLVHDEHLQHQGW	13.42	2	13	13.28	13.67	0.369	2.842	0.9222	High		81	92	CDRPPAIPKTTF	23.39	3	7	22.77	23.28	4.041	57.728	0.8946	High		81	92	CDRPPAIPKTTF	23.39	3	7	22.61	23.35	4.28	61.141	0.8999
139	153	CEGLVHDEHLQHQGW	13.42	3	13	13.28	13.72	0.658	5.063	0.8794	High		139	153	CEGLVHDEHLQHQGW	13.42	3	13	13.27	13.68	0.404	3.11	0.8184	High		81	97	CDRPPAIPKTTFSTEND	21.81	2	12	21.56	21.92	6.076	50.636	0.7526	High		81	97	CDRPPAIPKTTFSTEND	21.81	2	12	21.68	21.75	6.35	52.914	0.8414
158	172	ANLEDCSNSYQKLLF	15.69	2	13	15.45	15.78	2.661	20.472	0.7647	High		158	172	ANLEDCSNSYQKLLF	15.69	2	13	15.46	15.77	0.929	7.146	0.807	High		81	98	CDRPPAIPKTTFSTENDM	24.08	2	13	23.95	24.16	6.499	49.991	0.8005	High		81	98	CDRPPAIPKTTFSTENDM	24.08	2	13	23.78	24.16	6.439	49.53	0.7693
173	181	KFESIYSNY	13.47	2	7	13.27	13.68	1.085	15.495	0.8739	High		173	181	KFESIYSNY	13.47	2	7	13.31	13.73	0.918	13.116	0.8864	High		81	99	CDRPPAIPKTTFSTENDME	23.6	2	14	23.46	23.6	7.121	50.867	0.8771	High		81	99	CDRPPAIPKTTFSTENDME	23.6	2	14	23.46	23.7	7.569	54.063	0.8786
188	197	IKLKLTHLGT	13.12	2	8	12.87	13.16	1.838	22.975	0.88	High		188	197	IKLKLTHLGT	13.12	2	8	12.92	13.17	1.009	12.614	0.8735	High		81	99	CDRPPAIPKTTFSTENDME	23.6	3	14	23.35	23.68	6.999	49.993	0.869	High		81	99	CDRPPAIPKTTFSTENDME	23.6	3	14	23.37	23.61	7.565	54.037	0.8597
188	201	IKLKLTHLGTAVSV	14.07	2	12	13.81	13.96	3.082	25.686	0.8242	High		188	201	IKLKLTHLGTAVSV	14.07	2	12	13.81	14.03	1.933	16.106	0.8908	High		82	92	DRPPAIPKTTF	22.87	2	6	22.24	22.64	3.68	61.33	0.8834	High		82	92	DRPPAIPKTTF	22.87	2	6	22.13	22.67	3.83	63.826	0.8896
188	202	IKLKLTHLGTAVSVM	14.59	2	13	14.25	14.62	2.655	20.42	0.8353	High		188	202	IKLKLTHLGTAVSVM	14.59	2	13	14.25	14.59	2.119	16.302	0.8591	High		106	121	LMMPAVFHTVASRTQL	32.08	2	13	31.89	32.16	6.96	53.538	0.8584	High		106	121	LMMPAVFHTVASRTQL	32.08	2	13	31.94	32.15	7.134	54.875	0.8545
188	202	IKLKLTHLGTAVSVM	14.59	3	13	14.25	14.61	2.853	21.944	0.8641	High		188	202	IKLKLTHLGTAVSVM	14.59	3	13	14.26	14.64	2.137	16.442	0.8654	High		106	121	LMMPAVFHTVASRTQL	32.08	3	13	31.91	32.14	7.143	54.948	0.8442	High		106	121	LMMPAVFHTVASRTQL	32.08	3	13	31.85	32.06	7.074	54.416	0.8994
202	210	MAKIPLLEC	15.46	2	6	15.24	15.71	1.157	19.29	0.8644	High		202	210	MAKIPLLEC	15.46	2	6	15.25	15.72	1.085	18.076	0.8264	High		109	121	PAVFHTVASRTQL	23.88	3	11	23.65	23.91	5.968	54.257	0.8776	High		109	121	PAVFHTVASRTQL	23.88	3	11	23.66	23.95	6.067	55.152	0.8269
203	210	AKIPLLEC	14.61	2	5	14.42	14.95	1.18	23.607	0.8616	High		203	210	AKIPLLEC	14.61	2	5	14.45	14.97	1.131	22.629	0.8399	High		113	121	HTVASRTQL	15.29	2	7	14.86	15.54	3.663	52.327	0.8839	High		113	121	HTVASRTQL	15.29	2	7	14.77	15.58	3.685	52.642	0.857
211	220	LTRHSYRECL	12.58	3	8	12.39	12.62	4.65	58.124	0.5382	High		211	220	LTRHSYRECL	12.58	3	8	12.42	12.66	4.6	57.506	0.5612	High		124	135	EMYEVAKKLCSF	31.09	2	10	30.93	31.14	1.193	11.935	0.8353	High		124	135	EMYEVAKKLCSF	31.09	2	10	30.98	31.14	0.999	9.985	0.8872
224	237	DSLPEHEDSEKAEM	11.34	2	11	11.29	11.55	5.443	49.482	0.7763	High		224	237	DSLPEHEDSEKAEM	11.34	2	11	11.37	11.54	5.522	50.203	0.7096	High		125	135	MYEVAKKLCSF	28.83	2	9	28.85	29.13	1.021	11.346	0.9026	High		125	135	MYEVAKKLCSF	28.83	2	9	28.82	29.18	0.909	10.099	0.8879
224	242	DSLPEHEDSEKAEMKRSTE	11.11	3	16	10.91	11.19	8.973	56.083	0.9002	High		224	242	DSLPEHEDSEKAEMKRSTE	11.11	3	16	10.91	11.19	8.911	55.693	0.9167	High		126	135	YEVAKKLCSF	25.59	2	8	25.61	25.95	1.001	12.515	0.9332	High		126	135	YEVAKKLCSF	25.59	2	8	25.61	25.95	0.932	11.655	0.9277
224	243	DSLPEHEDSEKAEMKRSTEL	12.42	3	17	12.25	12.32	10.174	59.848	0.6677	High		224	243	DSLPEHEDSEKAEMKRSTEL	12.42	3	17	12.27	12.38	10.323	60.723	0.6349	High		126	135	YEVAKKLCSF	25.59	3	8	25.68	25.95	1.069	13.365	0.8565	High		126	135	YEVAKKLCSF	25.59	3	8	25.57	26.02	1.015	12.686	0.8045
243	255	LVLSPDMPRTTNE	12.66	2	9	12.52	12.95	6.187	68.741	0.9175	High		243	255	LVLSPDMPRTTNE	12.66	2	9	12.54	12.95	6.242	69.351	0.9114	High		135	150	FCEGLVHDEHLQHQGW	27.29	3	14	26.93	27.49	0.62	4.431	0.9083	High		135	150	FCEGLVHDEHLQHQGW	27.29	3	14	26.92	27.43	0.202	1.442	0.8731
243	257	LVLSPDMPRTTNESL	13.67	2	11	13.47	13.72	7.439	67.628	0.9038	High		243	257	LVLSPDMPRTTNESL	13.67	2	11	13.51	13.73	7.518	68.344	0.9087	High		136	150	CEGLVHDEHLQHQGW	24.51	2	13	24.49	24.93	0.614	4.726	0.9562	High		136	150	CEGLVHDEHLQHQGW	24.51	2	13	24.51	24.9	0.282	2.168	0.9475
244	255	VLSPDMPRTTNE	11.52	2	8	11.26	11.47	5.548	69.348	0.8739	High		244	255	VLSPDMPRTTNE	11.52	2	8	11.27	11.48	5.543	69.289	0.8856	High		136	150	CEGLVHDEHLQHQGW	24.51	3	13	24.55	24.9	0.582	4.476	0.9524	High		136	150	CEGLVHDEHLQHQGW	24.51	3	13	24.49	24.92	0.284	2.185	0.9399
244	257	VLSPDMPRTTNESL	12.7	2	10	12.59	12.9	6.801	68.007	0.8191	High		244	257	VLSPDMPRTTNESL	12.7	2	10	12.65	12.81	6.788	67.878	0.8863	High		136	154	CEGLVHDEHLQHQGWAAIM	29.51	3	17	29.55	29.72	0.624	3.67	0.9064	High		136	154	CEGLVHDEHLQHQGWAAIM	29.51	3	17	29.52	29.76	0.242	1.426	0.8855
259	280	TSFPKSVEHVSPDTADAESGKE	11.87	2	18	11.44	12.25	10.988	61.044	0.7242	High		259	280	TSFPKSVEHVSPDTADAESGKE	11.87	2	18	11.52	12.25	11.028	61.264	0.6891	High		139	150	LVHDEHLQHQGW	22.05	2	10	21.98	22.3	0.467	4.674	0.9309	High		139	150	LVHDEHLQHQGW	22.05	2	10	21.96	22.28	0.152	1.521	0.918
259	283	TSFPKSVEHVSPDTADAESGKEIRE	12.27	3	21	12.08	12.29	13.654	65.021	0.5817	High		259	283	TSFPKSVEHVSPDTADAESGKEIRE	12.27	3	21	12.01	12.38	13.696	65.218	0.6387	High		155	167	ANLEDCSNSYQKL	22.77	2	11	22.65	22.9	2.824	25.674	0.7739	High		155	167	ANLEDCSNSYQKL	22.77	2	11	22.67	22.9	0.855	7.77	0.8639
284	296	SCQSTVHQQDETT	9.78	2	11	9.75	9.84	7.424	67.489	0.4757	High		284	296	SCQSTVHQQDETT	9.78	2	11	9.73	9.95	7.338	66.709	0.567	High		158	167	EDCSNSYQKL	18.07	2	8	17.88	18.3	1.752	21.894	0.8585	High		158	167	EDCSNSYQKL	18.07	2	8	17.79	18.4	0.697	8.714	0.8817
297	307	IDTKDGDLPFF	15.83	2	8	15.75	16.13	3.873	48.417	0.8883	High		297	307	IDTKDGDLPFF	15.83	2	8	15.76	16.12	3.751	46.886	0.867	High		158	169	EDCSNSYQKLLF	29.12	2	10	28.93	29.58	1.356	13.559	0.8742	High		158	169	EDCSNSYQKLLF	29.12	2	10	28.96	29.25	0.532	5.324	0.9301
297	311	IDTKDGDLPFFNVSL	16.7	2	12	16.66	17.15	5.993	49.94	0.8517	High		297	311	IDTKDGDLPFFNVSL	16.7	2	12	16.66	17.13	5.915	49.29	0.8701	High		160	169	CSNSYQKLLF	28.65	2	8	28.47	28.84	0.73	9.12	0.8856	High		160	169	CSNSYQKLLF	28.65	2	8	28.51	28.9	0.322	4.03	0.7908
312	327	LDWINVQDRPNDVESL	15.03	2	13	14.89	15.32	4.321	33.241	0.9122	High		312	327	LDWINVQDRPNDVESL	15.03	2	13	14.92	15.34	3.007	23.131	0.9075	High		164	169	YQKLLF	27.46	2	4	27.39	27.95	0.14	3.497	0.909	High		164	169	YQKLLF	27.46	2	4	27.58	27.74	0.053	1.318	0.9164
314	327	WINVQDRPNDVESL	14.19	2	11	14	14.17	5.51	50.09	0.7678	High		314	327	WINVQDRPNDVESL	14.19	2	11	14.02	14.2	3.645	33.135	0.7262	High		168	174	LFKFESI	29.56	2	5	29.35	29.71	0.248	4.967	0.8422	High		168	174	LFKFESI	29.56	2	5	29.32	29.74	0.116	2.32	0.8993
328	335	VRKCFDSM	12.7	2	6	12.32	12.58	1.039	17.315	0.7725	High		328	335	VRKCFDSM	12.7	2	6	12.3	12.57	0.819	13.658	0.7485	High		168	178	LFKFESIYSNY	31.06	2	9	30.92	31.34	1.068	11.869	0.9226	High		168	178	LFKFESIYSNY	31.06	2	9	30.93	31.34	0.944	10.492	0.9253
328	349	VRKCFDSMSRLDPRIIRPFIAE	15.18	3	18	15.05	15.39	2.865	15.919	0.7985	High		328	349	VRKCFDSMSRLDPRIIRPFIAE	15.18	3	18	15.05	15.38	2.469	13.716	0.8005	High		169	178	FKFESIYSNY	29.21	2	8	29.08	29.2	1.209	15.117	0.8323	High		169	178	FKFESIYSNY	29.21	2	8	29.04	29.18	1.087	13.593	0.8059
350	372	CRQTIAKLDNQNMKAIKGLEDRL	15.13	3	21	14.96	15.29	12.214	58.16	0.9115	High		350	372	CRQTIAKLDNQNMKAIKGLEDRL	15.13	3	21	14.97	15.32	11.075	52.737	0.8813	High		170	178	KFESIYSNY	24.14	2	7	24.02	24.47	1.149	16.412	0.9323	High		170	178	KFESIYSNY	24.14	2	7	24	24.59	0.975	13.926	0.9178
351	372	RQTIAKLDNQNMKAIKGLEDRL	15.04	3	20	14.78	15.06	12.139	60.694	0.8722	High		351	372	RQTIAKLDNQNMKAIKGLEDRL	15.04	3	20	14.82	15.1	10.552	52.758	0.7546	High		170	179	KFESIYSNYL	29.15	2	8	29	29.23	1.044	13.049	0.885	High		170	179	KFESIYSNYL	29.15	2	8	28.98	29.3	0.944	11.798	0.8567
379	408	IASCGRLVNEQKELAQGFLANQKRAENLKD	15.02	3	28	14.82	15.08	11.863	42.367	0.8425	High		379	408	IASCGRLVNEQKELAQGFLANQKRAENLKD	15.02	3	28	14.84	15.08	11.976	42.77	0.8028	High		184	194	DIKLKLTHLGT	24.56	2	9	24.44	24.77	1.774	19.716	0.8479	High		184	194	DIKLKLTHLGT	24.56	2	9	24.37	24.7	1.115	12.393	0.8946
386	412	VNEQKELAQGFLANQKRAENLKDASVL	14.7	3	25	14.42	14.68	13.071	52.283	0.8814	High		386	412	VNEQKELAQGFLANQKRAENLKDASVL	14.7	3	25	14.41	14.72	13.095	52.38	0.8304	High		185	194	IKLKLTHLGT	23.4	2	8	23.39	23.72	1.694	21.177	0.9193	High		185	194	IKLKLTHLGT	23.4	2	8	23.31	23.66	1.113	13.909	0.9184
416	423	CLSHANQL	11.1	2	6	11.09	11.46	3.186	53.108	0.8625	High		416	423	CLSHANQL	11.1	2	6	11.23	11.47	3.181	53.016	0.8781	High		185	198	IKLKLTHLGTAVSV	26.83	2	12	26.85	27.29	3.235	26.962	0.8969	High		185	198	IKLKLTHLGTAVSV	26.83	2	12	26.8	27.15	2.252	18.766	0.9173
416	424	CLSHANQLM	12.26	2	7	12.11	12.36	3.278	46.828	0.7325	High		416	424	CLSHANQLM	12.26	2	7	12.14	12.4	3.269	46.695	0.7077	High		185	199	IKLKLTHLGTAVSVM	28.8	2	13	28.52	28.77	3.238	24.909	0.8417	High		185	199	IKLKLTHLGTAVSVM	28.8	2	13	28.43	28.7	2.323	17.869	0.914
425	451	IMLQNHRKLLDIKQKCTTAKQELANNL	14.35	3	25	14.19	14.54	3.539	14.157	0.9223	High		425	451	IMLQNHRKLLDIKQKCTTAKQELANNL	14.35	3	25	14.2	14.7	1.696	6.783	0.931	High		185	199	IKLKLTHLGTAVSVM	28.8	3	13	28.43	28.97	3.102	23.859	0.9189	High		185	199	IKLKLTHLGTAVSVM	28.8	3	13	28.4	28.9	2.296	17.662	0.9156
425	451	IMLQNHRKLLDIKQKCTTAKQELANNL	14.35	4	25	14.19	14.55	3.476	13.903	0.8658	High		425	451	IMLQNHRKLLDIKQKCTTAKQELANNL	14.35	4	25	14.25	14.51	1.737	6.95	0.6893	High		188	194	KLTHLGT	14.69	2	5	14.89	15.16	1.735	34.698	0.8436	High		188	194	KLTHLGT	14.69	2	5	14.8	15.13	1.135	22.705	0.8537
425	459	IMLQNHRKLLDIKQKCTTAKQELANNLHVRLKWCC	16.07	4	33	15.73	16.08	4.985	15.105	0.8748	High		425	459	IMLQNHRKLLDIKQKCTTAKQELANNLHVRLKWCC	16.07	4	33	15.71	16.2	1.655	5.015	0.9072	High		188	199	KLTHLGTAVSVM	23.87	2	10	23.71	24.01	2.815	28.15	0.8891	High		188	199	KLTHLGTAVSVM	23.87	2	10	23.66	23.89	2.015	20.151	0.8851
427	435	LQNHRKLLD	11.37	2	7	11.31	11.46	0.063	0.899	0.6065	High		427	435	LQNHRKLLD	11.37	2	7	11.28	11.45	0.105	1.507	0.7109	High		199	207	MAKIPLLEC	30.34	2	6	30	30.29	1.138	18.971	0.8821	High		199	207	MAKIPLLEC	30.34	2	6	29.89	30.31	0.985	16.42	0.8532
427	451	LQNHRKLLDIKQKCTTAKQELANNL	13.99	3	23	13.79	14.29	3.265	14.197	0.9037	High		427	451	LQNHRKLLDIKQKCTTAKQELANNL	13.99	3	23	13.8	14.26	1.225	5.324	0.8608	High		200	207	AKIPLLEC	27.25	2	5	27.21	27.62	1.17	23.395	0.9032	High		200	207	AKIPLLEC	27.25	2	5	27.15	27.59	1.008	20.158	0.8776
436	451	IKQKCTTAKQELANNL	12.6	2	14	12.39	12.58	3.713	26.52	0.755	High		436	451	IKQKCTTAKQELANNL	12.6	2	14	12.4	12.66	1.35	9.643	0.6618	High		200	208	AKIPLLECL	35.11	2	6	34.48	34.89	2.044	34.071	0.8105	High		200	208	AKIPLLECL	35.11	2	6	34.55	34.69	1.63	27.161	0.7246
452	459	HVRLKWCC	14.15	2	6	13.81	14.32	0.358	5.963	0.8344	High		452	459	HVRLKWCC	14.15	2	6	13.83	14.31	0.009	0.148	0.7874	High		208	217	LTRHSYRECL	21.23	3	8	21.2	21.42	3.442	43.025	0.8777	High		208	217	LTRHSYRECL	21.23	3	8	21.23	21.42	3.628	45.351	0.8817
452	460	HVRLKWCCF	16	2	7	15.91	16.08	0.58	8.281	0.8952	High		452	460	HVRLKWCCF	16	2	7	15.93	16.03	0.052	0.738	0.8855	High		218	240	GRLDSLPEHEDSEKAEMKRSTEL	24.25	3	20	23.35	23.62	9.76	48.799	0.8947	High		218	240	GRLDSLPEHEDSEKAEMKRSTEL	24.25	3	20	23.38	23.59	9.194	45.968	0.8869
460	475	FVMLHADQDGEKLQAL	14.33	2	14	14.47	14.6	1.76	12.57	0.8232	High		460	475	FVMLHADQDGEKLQAL	14.33	2	14	14.36	14.65	0.654	4.673	0.793	High		221	234	DSLPEHEDSEKAEM	18.56	2	11	17.88	18.26	4.56	41.452	0.8901	High		221	234	DSLPEHEDSEKAEM	18.56	2	11	17.85	18.26	4.75	43.184	0.8641
460	475	FVMLHADQDGEKLQAL	14.33	3	14	14.48	14.68	1.897	13.553	0.8622	High		460	475	FVMLHADQDGEKLQAL	14.33	3	14	14.23	14.62	0.661	4.72	0.8808	High		221	239	DSLPEHEDSEKAEMKRSTE	18.13	3	16	17.86	18.07	7.774	48.586	0.9046	High		221	239	DSLPEHEDSEKAEMKRSTE	18.13	3	16	18.05	18.22	7.875	49.218	0.8939
461	475	VMLHADQDGEKLQAL	13.36	2	13	13.12	13.46	1.65	12.692	0.8913	High		461	475	VMLHADQDGEKLQAL	13.36	2	13	13.12	13.49	0.358	2.756	0.8998	High		221	240	DSLPEHEDSEKAEMKRSTEL	21.76	3	17	21.61	21.87	8.281	48.712	0.8859	High		221	240	DSLPEHEDSEKAEMKRSTEL	21.76	3	17	21.8	21.93	8.463	49.785	0.7723
483	490	LERVKIVE	11.94	2	6	11.92	12.11	1.831	30.511	0.8614	High		483	490	LERVKIVE	11.94	2	6	11.87	12.28	1.367	22.781	0.6998	High		240	252	LVLSPDMPRTTNE	22.67	2	9	22.3	22.69	5.223	58.035	0.9064	High		240	252	LVLSPDMPRTTNE	22.67	2	9	22.57	22.91	5.403	60.032	0.8986
483	492	LERVKIVEAL	13.84	2	8	13.58	14.08	2.293	28.668	0.8828	High		483	492	LERVKIVEAL	13.84	2	8	13.67	14.09	1.476	18.45	0.8842	High		240	254	LVLSPDMPRTTNESL	25.64	2	11	25.56	25.79	6.135	55.77	0.9034	High		240	254	LVLSPDMPRTTNESL	25.64	2	11	25.4	25.9	6.311	57.376	0.8823
483	498	LERVKIVEALSTVPQM	15.08	2	13	14.82	15.34	3.41	26.231	0.917	High		483	498	LERVKIVEALSTVPQM	15.08	2	13	14.88	15.33	2.535	19.502	0.9031	High		241	252	VLSPDMPRTTNE	18.52	2	8	18.65	18.84	4.62	57.75	0.9031	High		241	252	VLSPDMPRTTNE	18.52	2	8	18.77	19.13	4.822	60.281	0.9105
506	523	VVRRKMFIKHYREWAGAL	14.45	3	16	14.27	14.48	0.793	4.957	0.9382	High		506	523	VVRRKMFIKHYREWAGAL	14.45	3	16	14.29	14.5	0.927	5.795	0.9414	High		241	254	VLSPDMPRTTNESL	22.57	2	10	22.54	23.04	5.61	56.098	0.8948	High		241	254	VLSPDMPRTTNESL	22.57	2	10	22.86	23.03	5.703	57.034	0.843
524	544	VKDGKRLYEAEKSKRESFGKL	12.84	3	19	12.94	13.12	2.924	15.391	0.9146	High		524	544	VKDGKRLYEAEKSKRESFGKL	12.84	3	19	12.91	13.12	1.899	9.996	0.9305	High		255	277	LTSFPKSVEHVSPDTADAESGKE	21.71	3	19	21.6	22.06	9.598	50.518	0.9084	High		255	277	LTSFPKSVEHVSPDTADAESGKE	21.71	3	19	21.51	21.95	9.964	52.443	0.8877
524	544	VKDGKRLYEAEKSKRESFGKL	12.84	4	19	12.67	12.89	2.828	14.884	0.9172	High		524	544	VKDGKRLYEAEKSKRESFGKL	12.84	4	19	12.67	12.91	1.878	9.882	0.9217	High		255	280	LTSFPKSVEHVSPDTADAESGKEIRE	22.88	3	22	22.83	23.01	11.46	52.09	0.8638	High		255	280	LTSFPKSVEHVSPDTADAESGKEIRE	22.88	3	22	22.92	23.04	11.774	53.518	0.8956
545	565	FRKSFLRNRLFRGLDSWPPSF	16.58	3	17	16.48	16.63	10.084	59.32	0.6897	High		545	565	FRKSFLRNRLFRGLDSWPPSF	16.58	3	17	16.51	16.66	9.955	58.561	0.7157	High		256	263	TSFPKSVE	17.41	2	5	17.29	17.63	3.485	69.692	0.7436	High		256	263	TSFPKSVE	17.41	2	5	17.24	17.66	3.5	70.005	0.8311
555	565	FRGLDSWPPSF	15.63	2	7	15.47	15.7	3.781	54.018	0.897	High		555	565	FRGLDSWPPSF	15.63	2	7	15.45	15.68	3.762	53.74	0.9033	High		256	280	TSFPKSVEHVSPDTADAESGKEIRE	21.78	3	21	21.6	21.96	11.014	52.45	0.8199	High		256	280	TSFPKSVEHVSPDTADAESGKEIRE	21.78	3	21	21.76	21.98	11.39	54.238	0.8161
566	577	CTQKPRKFDCEL	13.21	2	9	13.12	13.55	5.085	56.504	0.8745	High		566	577	CTQKPRKFDCEL	13.21	2	9	13.14	13.54	5.118	56.866	0.8683	High		264	277	HVSPDTADAESGKE	12.16	2	11	11.82	12.08	6.287	57.151	0.7742	High		264	277	HVSPDTADAESGKE	12.16	2	11	11.82	12.26	6.418	58.344	0.893
578	586	PDISLKDLQ	13.72	2	7	13.41	13.7	2.511	35.871	0.8858	High		578	586	PDISLKDLQ	13.72	2	7	13.42	13.71	2.275	32.503	0.852	High		264	280	HVSPDTADAESGKEIRE	17.16	3	14	17.01	17.23	8.265	59.032	0.731	High		264	280	HVSPDTADAESGKEIRE	17.16	3	14	17.01	17.23	8.14	58.144	0.8718
578	587	PDISLKDLQF	15.64	2	8	15.41	15.94	2.538	31.719	0.9026	High		578	587	PDISLKDLQF	15.64	2	8	15.46	15.94	2.324	29.046	0.8962	High		281	293	SCQSTVHQQDETT	11.23	2	11	10.77	10.98	6.29	57.18	0.904	High		281	293	SCQSTVHQQDETT	11.23	2	11	10.95	11.16	6.468	58.799	0.895
587	605	FLQSFCPSEVQPFLRVPLL	18.12	2	14	18.09	18.48	4.597	32.836	0.8994	High		587	605	FLQSFCPSEVQPFLRVPLL	18.12	2	14	18.12	18.51	4.703	33.594	0.9136	High		281	304	SCQSTVHQQDETTIDTKDGDLPFF	31.41	3	21	30.67	31.08	8.875	42.26	0.8782	High		281	304	SCQSTVHQQDETTIDTKDGDLPFF	31.41	3	21	30.95	31.22	9.227	43.938	0.7973
588	602	LQSFCPSEVQPFLRV	16.1	2	11	15.81	16.05	3.572	32.477	0.8218	High		588	602	LQSFCPSEVQPFLRV	16.1	2	11	15.89	15.99	3.547	32.245	0.7026	High		281	308	SCQSTVHQQDETTIDTKDGDLPFFNVSL	34.5	3	25	34.55	34.66	10.775	43.098	0.7824	High		281	308	SCQSTVHQQDETTIDTKDGDLPFFNVSL	34.5	3	25	34.22	34.66	10.827	43.309	0.7585
588	605	LQSFCPSEVQPFLRVPLL	17.87	2	13	17.4	17.89	4.636	35.664	0.9119	High		588	605	LQSFCPSEVQPFLRVPLL	17.87	2	13	17.37	17.9	4.553	35.025	0.9087	High		294	304	IDTKDGDLPFF	31.11	2	8	31.08	31.73	2.981	37.263	0.8883	High		294	304	IDTKDGDLPFF	31.11	2	8	31.4	31.74	3.113	38.909	0.8894
588	606	LQSFCPSEVQPFLRVPLLC	17.75	2	14	17.76	18.09	5.501	39.293	0.8876	High		588	606	LQSFCPSEVQPFLRVPLLC	17.75	2	14	17.77	18.13	5.329	38.067	0.9223	High		294	308	IDTKDGDLPFFNVSL	35.24	2	12	34.97	35.24	4.703	39.188	0.8981	High		294	308	IDTKDGDLPFFNVSL	35.24	2	12	35.07	35.45	4.674	38.946	0.8392
588	607	LQSFCPSEVQPFLRVPLLCD	17.52	2	15	17.43	17.83	6.114	40.759	0.8652	High		588	607	LQSFCPSEVQPFLRVPLLCD	17.52	2	15	17.66	17.72	5.912	39.413	0.6777	High		309	322	LDWINVQDRPNDVE	26.97	2	11	26.65	27.22	3.751	34.098	0.8656	High		309	322	LDWINVQDRPNDVE	26.97	2	11	26.82	27.04	2.88	26.185	0.8778
591	605	FCPSEVQPFLRVPLL	17.17	2	10	17.19	17.76	4.075	40.747	0.8996	High		591	605	FCPSEVQPFLRVPLL	17.17	2	10	17.11	17.73	4.129	41.286	0.9211	High		309	324	LDWINVQDRPNDVESL	29.63	2	13	29.71	30.04	4.378	33.673	0.9123	High		309	324	LDWINVQDRPNDVESL	29.63	2	13	29.67	30.13	3.181	24.471	0.9264
591	607	FCPSEVQPFLRVPLLCD	17.46	2	12	17.29	17.57	6.438	53.648	0.6715	High		591	607	FCPSEVQPFLRVPLLCD	17.46	2	12	17.34	17.6	6.59	54.917	0.7982	High		310	324	DWINVQDRPNDVESL	28.32	2	12	28.13	28.28	4.253	35.439	0.8507	High		310	324	DWINVQDRPNDVESL	28.32	2	12	27.93	28.46	3.294	27.452	0.858
593	605	PSEVQPFLRVPLL	16.71	2	9	16.51	16.8	3.696	41.069	0.8559	High		593	605	PSEVQPFLRVPLL	16.71	2	9	16.5	16.83	3.564	39.6	0.8707	High		311	324	WINVQDRPNDVESL	26.66	2	11	26.65	26.91	4.696	42.688	0.906	High		311	324	WINVQDRPNDVESL	26.66	2	11	26.57	26.88	3.464	31.487	0.872
606	618	CDFEPLHQHVLAL	15.15	2	10	15.15	15.38	4.646	46.464	0.8678	High		606	618	CDFEPLHQHVLAL	15.15	2	10	15.17	15.36	4.426	44.258	0.8796	High		314	324	VQDRPNDVESL	19.65	2	8	19.6	19.82	3.782	47.27	0.9021	High		314	324	VQDRPNDVESL	19.65	2	8	19.53	19.8	3.465	43.312	0.8349
606	628	CDFEPLHQHVLALHNLVKAAQSL	16.89	3	20	16.58	16.82	12.725	63.623	0.8326	High		606	628	CDFEPLHQHVLALHNLVKAAQSL	16.89	3	20	16.57	16.82	12.709	63.545	0.7807	High		315	324	QDRPNDVESL	19	2	7	18.96	19.15	3.688	52.682	0.8506	High		315	324	QDRPNDVESL	19	2	7	18.88	19.25	3.091	44.153	0.7616
606	630	CDFEPLHQHVLALHNLVKAAQSLDE	16.62	3	22	16.26	16.58	11.374	51.699	0.8459	High		606	630	CDFEPLHQHVLALHNLVKAAQSLDE	16.62	3	22	16.23	16.65	11.422	51.919	0.8242	High		323	332	SLVRKCFDSM	28	2	8	27.77	27.91	1.924	24.048	0.8244	High		323	332	SLVRKCFDSM	28	2	8	27.74	28.06	1.091	13.637	0.8866
606	638	CDFEPLHQHVLALHNLVKAAQSLDEMSQTITDL	18.54	3	30	18.16	18.46	19.199	63.997	0.7351	High		606	638	CDFEPLHQHVLALHNLVKAAQSLDEMSQTITDL	18.54	3	30	18.16	18.45	19.102	63.673	0.851	High		324	332	LVRKCFDSM	22.62	2	7	22.49	22.63	1.217	17.383	0.843	High		324	332	LVRKCFDSM	22.62	2	7	22.4	22.71	0.607	8.668	0.8658
608	618	FEPLHQHVLAL	14.67	2	8	14.39	14.61	3.375	42.188	0.8626	High		608	618	FEPLHQHVLAL	14.67	2	8	14.4	14.59	3.298	41.222	0.813	High		325	332	VRKCFDSM	21.15	2	6	20.51	20.64	1.098	18.294	0.8935	High		325	332	VRKCFDSM	21.15	2	6	20.5	20.91	0.576	9.596	0.8819
619	630	HNLVKAAQSLDE	12.15	2	10	12.11	12.26	6.99	69.898	0.8116	High		619	630	HNLVKAAQSLDE	12.15	2	10	12.05	12.21	6.994	69.944	0.8487	High		325	346	VRKCFDSMSRLDPRIIRPFIAE	30.54	3	18	30.77	31.03	2.874	15.965	0.8632	High		325	346	VRKCFDSMSRLDPRIIRPFIAE	30.54	3	18	30.52	31.07	2.728	15.157	0.888
639	659	LSEQKASVSQTSPQSASSPRM	11	2	17	10.81	11.29	12.261	72.123	0.9244	High		639	659	LSEQKASVSQTSPQSASSPRM	11	2	17	10.82	11.29	12.263	72.137	0.8897	High		325	346	VRKCFDSMSRLDPRIIRPFIAE	30.54	4	18	30.58	31.01	2.976	16.535	0.8274	High		325	346	VRKCFDSMSRLDPRIIRPFIAE	30.54	4	18	30.56	30.91	2.707	15.039	0.8794
639	659	LSEQKASVSQTSPQSASSPRM	11	3	17	10.82	11.18	12.279	72.232	0.8877	High		639	659	LSEQKASVSQTSPQSASSPRM	11	3	17	10.83	11.2	12.237	71.981	0.9025	High		325	347	VRKCFDSMSRLDPRIIRPFIAEC	32.32	3	19	32.2	32.76	2.699	14.206	0.9238	High		325	347	VRKCFDSMSRLDPRIIRPFIAEC	32.32	3	19	32.21	32.72	2.401	12.636	0.8994
660	688	ESTAGITTTTSPRTPPPLTVQDPLCPAVC	14.85	2	21	14.58	15.01	14.348	68.322	0.624	High		660	688	ESTAGITTTTSPRTPPPLTVQDPLCPAVC	14.85	2	21	14.51	15.06	14.261	67.91	0.6888	High		333	346	SRLDPRIIRPFIAE	27.96	2	10	27.57	27.77	1.264	12.638	0.955	High		333	346	SRLDPRIIRPFIAE	27.96	2	10	27.57	27.6	1.179	11.788	0.9372
689	704	PLEELSPDSIDAHTFD	14.54	2	13	14.33	14.48	7.732	59.48	0.7546	High		689	704	PLEELSPDSIDAHTFD	14.54	2	13	14.29	14.4	7.693	59.173	0.667	High		333	346	SRLDPRIIRPFIAE	27.96	3	10	27.55	27.85	1.293	12.933	0.947	High		333	346	SRLDPRIIRPFIAE	27.96	3	10	27.59	27.75	1.223	12.233	0.9339
705	724	FETIPHPNIEQTIHQVSLDL	16.84	2	16	16.72	17.02	11.428	71.426	0.8877	High		705	724	FETIPHPNIEQTIHQVSLDL	16.84	2	16	16.66	17.06	11.61	72.561	0.8969	High		333	347	SRLDPRIIRPFIAEC	29.63	2	11	29.66	29.88	1.21	10.998	0.9436	High		333	347	SRLDPRIIRPFIAEC	29.63	2	11	29.58	29.98	1.139	10.352	0.9507
705	724	FETIPHPNIEQTIHQVSLDL	16.84	3	16	16.75	16.91	11.411	71.318	0.7362	High		705	724	FETIPHPNIEQTIHQVSLDL	16.84	3	16	16.71	16.99	11.617	72.607	0.8056	High		333	347	SRLDPRIIRPFIAEC	29.63	3	11	29.69	29.98	1.203	10.937	0.9159	High		333	347	SRLDPRIIRPFIAEC	29.63	3	11	29.76	29.98	1.134	10.309	0.9394
706	724	ETIPHPNIEQTIHQVSLDL	16.61	2	15	16.31	16.77	10.818	72.122	0.9083	High		706	724	ETIPHPNIEQTIHQVSLDL	16.61	2	15	16.41	16.69	11.05	73.667	0.8817	High		347	354	CRQTIAKL	18.73	2	6	18.7	18.89	1.553	25.886	0.9023	High		347	354	CRQTIAKL	18.73	2	6	18.56	18.86	0.627	10.448	0.8453
747	762	NLSSPNPISDPQSPEM	12.74	2	10	12.53	12.75	7.846	78.463	0.508	High		747	762	NLSSPNPISDPQSPEM	12.74	2	10	12.52	12.76	7.934	79.337	0.4612	High		347	361	CRQTIAKLDNQNMKA	19.73	3	13	19.56	19.74	6.76	51.999	0.7873	High		347	361	CRQTIAKLDNQNMKA	19.73	3	13	19.52	19.72	5.644	43.415	0.8531
775	797	IDSRRMQDTNVCGKEDFGDHTSL	13.29	3	21	12.98	13.3	10.806	51.457	0.8712	High		775	797	IDSRRMQDTNVCGKEDFGDHTSL	13.29	3	21	13.03	13.22	10.68	50.858	0.7682	High		347	369	CRQTIAKLDNQNMKAIKGLEDRL	31.02	3	21	30.75	31.03	11.351	54.05	0.9169	High		347	369	CRQTIAKLDNQNMKAIKGLEDRL	31.02	3	21	30.8	31.11	10.061	47.909	0.9335
845	858	VEIRNIIEKVKCSL	16.19	2	12	16.02	16.09	4.319	35.995	0.7	High		845	858	VEIRNIIEKVKCSL	16.19	2	12	16.05	16.14	4.501	37.509	0.5717	High		347	369	CRQTIAKLDNQNMKAIKGLEDRL	31.02	4	21	30.86	31.03	11.316	53.888	0.9047	High		347	369	CRQTIAKLDNQNMKAIKGLEDRL	31.02	4	21	30.85	31.03	10.343	49.253	0.9097
906	915	EEVLQNKDNE	10.38	2	8	10.21	10.74	3.533	44.169	0.8087	High		906	915	EEVLQNKDNE	10.38	2	8	10.21	10.58	3.767	47.09	0.6917	High		348	354	RQTIAKL	18.09	2	5	17.87	18.23	1.238	24.756	0.7664	High		348	354	RQTIAKL	18.09	2	5	17.74	17.91	0.382	7.634	0.7618
916	926	FALVKHEKEAV	12.24	2	9	12.15	12.3	5.692	63.245	0.9149	High		916	926	FALVKHEKEAV	12.24	2	9	12.07	12.28	5.735	63.72	0.885	High		348	369	RQTIAKLDNQNMKAIKGLEDRL	30.33	2	20	30.12	30.39	11.639	58.197	0.8435	High		348	369	RQTIAKLDNQNMKAIKGLEDRL	30.33	2	20	30.18	30.41	10.15	50.751	0.8638
917	926	ALVKHEKEAV	10.62	2	8	10.58	10.88	3.841	48.007	0.7646	High		917	926	ALVKHEKEAV	10.62	2	8	10.65	10.78	3.887	48.585	0.7741	High		348	369	RQTIAKLDNQNMKAIKGLEDRL	30.33	3	20	30.02	30.49	11.358	56.792	0.9234	High		348	369	RQTIAKLDNQNMKAIKGLEDRL	30.33	3	20	30.17	30.55	10.024	50.121	0.926
927	937	ICLQNEKDQKL	12.11	2	9	12.06	12.19	0.794	8.824	0.6926	High		927	937	ICLQNEKDQKL	12.11	2	9	12.07	12.2	0.675	7.501	0.7359	High		348	369	RQTIAKLDNQNMKAIKGLEDRL	30.33	4	20	30.24	30.44	11.468	57.341	0.9254	High		348	369	RQTIAKLDNQNMKAIKGLEDRL	30.33	4	20	30.35	30.51	10.086	50.431	0.8666
950	959	EIKELKQSRE	10.64	2	8	10.39	10.77	2.655	33.187	0.835	High		950	959	EIKELKQSRE	10.64	2	8	10.49	10.76	2.564	32.049	0.7118	High		355	369	DNQNMKAIKGLEDRL	28.39	3	13	27.78	28.14	8.93	68.693	0.8944	High		355	369	DNQNMKAIKGLEDRL	28.39	3	13	27.81	27.98	8.601	66.162	0.7953
951	959	IKELKQSRE	10.09	2	7	10.1	10.47	2.38	34	0.8339	High		951	959	IKELKQSRE	10.09	2	7	10.11	10.37	2.364	33.769	0.8219	High		360	369	KAIKGLEDRL	22.65	2	8	22.51	22.77	4.335	54.182	0.8197	High		360	369	KAIKGLEDRL	22.65	2	8	22.63	22.77	3.932	49.149	0.8386
960	978	IVLEDLKKLHVENDEKLQL	14.8	2	17	14.81	15.06	5.978	35.165	0.885	High		960	978	IVLEDLKKLHVENDEKLQL	14.8	2	17	14.8	15.09	5.961	35.068	0.8703	High		362	369	IKGLEDRL	22.68	2	6	22.61	22.88	3.386	56.439	0.9081	High		362	369	IKGLEDRL	22.68	2	6	22.77	22.96	2.947	49.113	0.8797
960	978	IVLEDLKKLHVENDEKLQL	14.8	3	17	14.77	15.12	5.673	33.37	0.8452	High		960	978	IVLEDLKKLHVENDEKLQL	14.8	3	17	14.79	15.1	5.644	33.198	0.8577	High		376	382	IASCGRL	17.74	2	5	17.8	18.14	2.135	42.7	0.7981	High		376	382	IASCGRL	17.74	2	5	17.78	18.14	2.146	42.914	0.8475
984	993	QSLEQSHLKE	10.76	2	8	10.82	11.02	2.83	35.378	0.8418	High		984	993	QSLEQSHLKE	10.76	2	8	10.75	11.02	2.735	34.186	0.8333	High		376	385	IASCGRLVNE	19.13	2	8	18.73	18.93	2.363	29.543	0.7859	High		376	385	IASCGRLVNE	19.13	2	8	18.59	19.06	2.067	25.843	0.7515
984	998	QSLEQSHLKELEDTL	15	2	13	14.81	14.9	4.821	37.082	0.846	High		984	998	QSLEQSHLKELEDTL	15	2	13	14.84	14.96	4.737	36.442	0.8586	High		376	393	IASCGRLVNEQKELAQGF	28.23	2	16	27.93	28.12	2.409	15.054	0.8296	High		376	393	IASCGRLVNEQKELAQGF	28.23	2	16	27.89	28.18	2.422	15.139	0.7745
999	1005	QVRHIQE	10.07	2	5	10.05	10.23	2.901	58.019	0.8659	High		999	1005	QVRHIQE	10.07	2	5	10.04	10.25	2.919	58.382	0.8426	High		376	402	IASCGRLVNEQKELAQGFLANQKRAEN	29.63	3	25	29.36	29.76	8.968	35.871	0.7275	High		376	402	IASCGRLVNEQKELAQGFLANQKRAEN	29.63	3	25	29.49	29.75	8.973	35.894	0.8595
1006	1017	FEKVMTDHRVSL	13.04	2	10	12.86	13.09	3.529	35.294	0.9195	High		1006	1017	FEKVMTDHRVSL	13.04	2	10	12.93	13.08	3.524	35.241	0.8972	High		376	405	IASCGRLVNEQKELAQGFLANQKRAENLKD	30.4	3	28	30.32	30.61	10.702	38.22	0.9213	High		376	405	IASCGRLVNEQKELAQGFLANQKRAENLKD	30.4	3	28	30.41	30.57	10.906	38.948	0.915
1006	1017	FEKVMTDHRVSL	13.04	3	10	12.9	13.08	3.701	37.009	0.8671	High		1006	1017	FEKVMTDHRVSL	13.04	3	10	12.91	13.08	3.653	36.534	0.8512	High		376	405	IASCGRLVNEQKELAQGFLANQKRAENLKD	30.4	4	28	30.27	30.65	11.081	39.577	0.9121	High		376	405	IASCGRLVNEQKELAQGFLANQKRAENLKD	30.4	4	28	30.3	30.65	11.1	39.644	0.9186
1006	1019	FEKVMTDHRVSLEE	12.79	2	12	12.54	12.76	3.84	32.001	0.6781	High		1006	1019	FEKVMTDHRVSLEE	12.79	2	12	12.56	12.73	3.815	31.795	0.6945	High		376	409	IASCGRLVNEQKELAQGFLANQKRAENLKDASVL	32.15	3	32	31.97	32.32	13.063	40.821	0.8723	High		376	409	IASCGRLVNEQKELAQGFLANQKRAENLKDASVL	32.15	3	32	31.9	32.38	13.337	41.677	0.9192
1006	1019	FEKVMTDHRVSLEE	12.79	3	12	12.52	12.78	3.965	33.043	0.8185	High		1006	1019	FEKVMTDHRVSLEE	12.79	3	12	12.53	12.8	4.078	33.983	0.8304	High		376	409	IASCGRLVNEQKELAQGFLANQKRAENLKDASVL	32.15	4	32	32.03	32.33	13.377	41.803	0.9009	High		376	409	IASCGRLVNEQKELAQGFLANQKRAENLKDASVL	32.15	4	32	31.93	32.34	13.479	42.122	0.9166
1006	1030	FEKVMTDHRVSLEELKKENQQIINQ	13.83	3	23	13.51	13.76	5.355	23.283	0.8209	High		1006	1030	FEKVMTDHRVSLEELKKENQQIINQ	13.83	3	23	13.57	13.77	5.496	23.894	0.8072	High		376	412	IASCGRLVNEQKELAQGFLANQKRAENLKDASVLPDL	33.72	3	34	33.36	34.1	13.773	40.508	0.8529	High		376	412	IASCGRLVNEQKELAQGFLANQKRAENLKDASVLPDL	33.72	3	34	33.2	33.97	13.834	40.687	0.8167
1007	1017	EKVMTDHRVSL	12.29	2	9	12.27	12.39	3.271	36.342	0.7988	High		1007	1017	EKVMTDHRVSL	12.29	2	9	12.24	12.38	3.348	37.195	0.8312	High		383	392	VNEQKELAQG	13.27	2	8	12.63	13.09	1.045	13.057	0.7457	High		383	392	VNEQKELAQG	13.27	2	8	12.62	13.14	1.004	12.546	0.7576
1018	1030	EELKKENQQIINQ	10.78	2	11	10.71	10.94	1.645	14.952	0.9399	High		1018	1030	EELKKENQQIINQ	10.78	2	11	10.69	10.92	1.674	15.217	0.9504	High		383	393	VNEQKELAQGF	22.59	2	9	22.53	22.86	0.724	8.046	0.9004	High		383	393	VNEQKELAQGF	22.59	2	9	22.53	22.85	0.784	8.716	0.9259
1018	1030	EELKKENQQIINQ	10.78	3	11	10.78	10.93	1.783	16.213	0.8553	High		1018	1030	EELKKENQQIINQ	10.78	3	11	10.78	10.92	1.754	15.95	0.8714	High		383	394	VNEQKELAQGFL	27.05	2	10	26.93	27.24	1.52	15.198	0.9054	High		383	394	VNEQKELAQGFL	27.05	2	10	26.89	27.25	1.585	15.853	0.9037
1020	1030	LKKENQQIINQ	10.68	2	9	10.5	10.88	1.526	16.951	0.8993	High		1020	1030	LKKENQQIINQ	10.68	2	9	10.48	10.94	1.573	17.478	0.9038	High		383	405	VNEQKELAQGFLANQKRAENLKD	26.14	3	21	25.88	26.22	9.507	45.271	0.8764	High		383	405	VNEQKELAQGFLANQKRAENLKD	26.14	3	21	25.85	26.37	9.62	45.81	0.8807
1021	1030	KKENQQIINQ	10.31	2	8	10.3	10.67	1.364	17.054	0.9082	High		1021	1030	KKENQQIINQ	10.31	2	8	10.32	10.65	1.294	16.179	0.9022	High		383	405	VNEQKELAQGFLANQKRAENLKD	26.14	4	21	25.88	26.31	9.85	46.906	0.8508	High		383	405	VNEQKELAQGFLANQKRAENLKD	26.14	4	21	25.84	26.28	10.06	47.904	0.8642
1031	1048	IQESHAEIIQEKEKQLQE	12.2	2	16	12.1	12.26	3.106	19.41	0.8733	High		1031	1048	IQESHAEIIQEKEKQLQE	12.2	2	16	12.01	12.31	3.196	19.974	0.8679	High		383	409	VNEQKELAQGFLANQKRAENLKDASVL	28.94	3	25	28.83	29.13	12.223	48.891	0.9193	High		383	409	VNEQKELAQGFLANQKRAENLKDASVL	28.94	3	25	28.82	29.25	12.396	49.585	0.9003
1031	1048	IQESHAEIIQEKEKQLQE	12.2	3	16	12.05	12.35	3.071	19.192	0.8579	High		1031	1048	IQESHAEIIQEKEKQLQE	12.2	3	16	12.08	12.22	3.225	20.156	0.8603	High		383	409	VNEQKELAQGFLANQKRAENLKDASVL	28.94	4	25	28.95	29.17	12.477	49.906	0.7778	High		383	409	VNEQKELAQGFLANQKRAENLKDASVL	28.94	4	25	28.97	29.17	12.712	50.848	0.7916
1031	1051	IQESHAEIIQEKEKQLQELKL	14.54	3	19	14.31	14.62	3.351	17.635	0.8944	High		1031	1051	IQESHAEIIQEKEKQLQELKL	14.54	3	19	14.36	14.6	3.583	18.856	0.8935	High		383	412	VNEQKELAQGFLANQKRAENLKDASVLPDL	31.38	3	27	31.15	31.5	13.134	48.645	0.8647	High		383	412	VNEQKELAQGFLANQKRAENLKDASVLPDL	31.38	3	27	31.14	31.5	13.263	49.121	0.8604
1052	1063	KVSDLSDTRCKL	12.56	2	10	12.35	12.68	3.729	37.292	0.8716	High		1052	1063	KVSDLSDTRCKL	12.56	2	10	12.35	12.62	4.013	40.128	0.8926	High		410	420	PDLCLSHANQL	24.58	2	9	24.32	24.59	4.72	52.444	0.7937	High		410	420	PDLCLSHANQL	24.58	2	9	24.32	24.51	4.796	53.289	0.7216
1067	1076	LALKEAETDE	11.25	2	8	11.12	11.46	1.52	19.005	0.8971	High		1067	1076	LALKEAETDE	11.25	2	8	11.12	11.5	1.552	19.398	0.8819	High		413	421	CLSHANQLM	19.84	2	7	19.87	20.17	2.672	38.174	0.8839	High		413	421	CLSHANQLM	19.84	2	7	20.03	20.22	2.715	38.787	0.8943
1082	1096	EESRAQQKETLKSLL	13.93	2	13	13.75	13.96	9.937	76.439	0.6373	High		1082	1096	EESRAQQKETLKSLL	13.93	2	13	13.65	13.96	9.637	74.135	0.398	High		422	432	IMLQNHRKLLD	22.18	2	9	22.18	22.56	0.061	0.675	0.9154	High		422	432	IMLQNHRKLLD	22.18	2	9	22.11	22.44	0.056	0.622	0.9183
1104	1125	RTEISKLNQKIQDNNENYQVGL	13.69	3	20	13.45	13.7	5.122	25.61	0.6612	High		1104	1125	RTEISKLNQKIQDNNENYQVGL	13.69	3	20	13.51	13.62	5.576	27.878	0.6731	High		422	439	IMLQNHRKLLDIKQKCTT	23.79	3	16	23.66	24.04	1.088	6.799	0.8555	High		422	439	IMLQNHRKLLDIKQKCTT	23.79	3	16	23.68	23.71	0.511	3.193	0.7755
1143	1154	LISRHEEESNIL	12.9	2	10	12.72	13.08	2.051	20.513	0.9215	High		1143	1154	LISRHEEESNIL	12.9	2	10	12.72	13.07	2.084	20.842	0.899	High		422	448	IMLQNHRKLLDIKQKCTTAKQELANNL	28.77	3	25	28.58	29.05	4.545	18.178	0.9428	High		422	448	IMLQNHRKLLDIKQKCTTAKQELANNL	28.77	3	25	28.63	29.04	1.941	7.765	0.9518
1144	1154	ISRHEEESNIL	12.39	2	9	12.39	12.64	1.605	17.833	0.9132	High		1144	1154	ISRHEEESNIL	12.39	2	9	12.39	12.65	1.647	18.295	0.9363	High		422	448	IMLQNHRKLLDIKQKCTTAKQELANNL	28.77	4	25	28.64	28.92	4.74	18.96	0.9348	High		422	448	IMLQNHRKLLDIKQKCTTAKQELANNL	28.77	4	25	28.61	29.01	1.966	7.865	0.9549
1159	1169	NKVTSLHNQAF	12.34	2	9	12.16	12.28	6.099	67.771	0.6966	High		1159	1169	NKVTSLHNQAF	12.34	2	9	12.14	12.29	6.141	68.234	0.8076	High		422	456	IMLQNHRKLLDIKQKCTTAKQELANNLHVRLKWCC	33.66	3	33	33.42	33.91	6.305	19.105	0.7565	High		422	456	IMLQNHRKLLDIKQKCTTAKQELANNLHVRLKWCC	33.66	3	33	33.39	33.75	1.708	5.175	0.86
1171	1182	IEKNLKEQIIEL	14.56	2	10	14.29	14.55	1.051	10.509	0.9119	High		1171	1182	IEKNLKEQIIEL	14.56	2	10	14.35	14.57	1.135	11.352	0.8912	High		422	456	IMLQNHRKLLDIKQKCTTAKQELANNLHVRLKWCC	33.66	4	33	33.45	33.79	6.276	19.017	0.9	High		422	456	IMLQNHRKLLDIKQKCTTAKQELANNLHVRLKWCC	33.66	4	33	33.52	33.81	1.838	5.569	0.8963
1234	1239	IQKLNC	11.06	2	4	10.95	11.15	1.706	42.66	0.7819	High		1234	1239	IQKLNC	11.06	2	4	10.98	11.14	1.793	44.821	0.8179	High		422	457	IMLQNHRKLLDIKQKCTTAKQELANNLHVRLKWCCF	35.76	4	34	35.59	35.78	6.35	18.678	0.8639	High		422	457	IMLQNHRKLLDIKQKCTTAKQELANNLHVRLKWCCF	35.76	4	34	35.56	35.84	1.765	5.192	0.8968
1240	1251	EKDEAIQTALKE	12.09	2	10	12.14	12.24	2.704	27.036	0.723	High		1240	1251	EKDEAIQTALKE	12.09	2	10	12.04	12.3	2.932	29.316	0.7279	High		424	432	LQNHRKLLD	18.06	2	7	17.17	17.41	0.119	1.701	0.8617	High		424	432	LQNHRKLLD	18.06	2	7	17.14	17.36	0.119	1.704	0.8991
1252	1264	FKLEREVVEKELL	14.67	2	11	14.6	14.86	5.44	49.451	0.7778	High		1252	1264	FKLEREVVEKELL	14.67	2	11	14.6	14.84	5.468	49.705	0.805	High		424	448	LQNHRKLLDIKQKCTTAKQELANNL	27.63	3	23	27.39	27.81	4.558	19.819	0.9358	High		424	448	LQNHRKLLDIKQKCTTAKQELANNL	27.63	3	23	27.48	27.82	1.893	8.232	0.9504
1265	1290	EKVKHLENQIAKSPAIDSTRGDSSSL	12.6	3	23	12.3	12.58	12.341	53.658	0.8769	High		1265	1290	EKVKHLENQIAKSPAIDSTRGDSSSL	12.6	3	23	12.35	12.58	12.757	55.466	0.8887	High		424	448	LQNHRKLLDIKQKCTTAKQELANNL	27.63	4	23	27.45	27.7	4.753	20.665	0.9193	High		424	448	LQNHRKLLDIKQKCTTAKQELANNL	27.63	4	23	27.47	27.74	1.826	7.94	0.9358
1274	1290	IAKSPAIDSTRGDSSSL	11.56	2	14	11.39	11.6	9.142	65.302	0.7816	High		1274	1290	IAKSPAIDSTRGDSSSL	11.56	2	14	11.44	11.62	9.047	64.623	0.8546	High		424	457	LQNHRKLLDIKQKCTTAKQELANNLHVRLKWCCF	35.43	4	32	34.95	35.34	6.961	21.753	0.8008	High		424	457	LQNHRKLLDIKQKCTTAKQELANNLHVRLKWCCF	35.43	4	32	34.98	35.34	1.851	5.785	0.8595
1291	1305	VAELQEKLQEEKAKF	13.84	3	13	13.62	14.12	10.311	79.318	0.8843	High		1291	1305	VAELQEKLQEEKAKF	13.84	3	13	13.65	14.04	10.408	80.062	0.8721	High		433	448	IKQKCTTAKQELANNL	21.96	2	14	21.84	22.02	4.588	32.772	0.918	High		433	448	IKQKCTTAKQELANNL	21.96	2	14	22.03	22.24	1.477	10.551	0.8842
1291	1321	VAELQEKLQEEKAKFLEQLEEQEKRKNEEMQ	14.99	3	29	14.84	15.12	22.98	79.242	0.8233	High		1291	1321	VAELQEKLQEEKAKFLEQLEEQEKRKNEEMQ	14.99	3	29	14.89	15.16	22.901	78.968	0.829	High		433	448	IKQKCTTAKQELANNL	21.96	3	14	21.76	22.22	4.57	32.643	0.8863	High		433	448	IKQKCTTAKQELANNL	21.96	3	14	22.01	22.22	1.472	10.511	0.9405
1291	1327	VAELQEKLQEEKAKFLEQLEEQEKRKNEEMQNVRTSL	15.89	4	35	15.27	15.75	28.278	80.794	0.9085	High		1291	1327	VAELQEKLQEEKAKFLEQLEEQEKRKNEEMQNVRTSL	15.89	4	35	15.31	15.73	28.535	81.527	0.882	High		440	448	AKQELANNL	18.27	2	7	18.23	18.48	2.371	33.875	0.8458	High		440	448	AKQELANNL	18.27	2	7	18.35	18.58	0.421	6.011	0.9022
1295	1305	QEKLQEEKAKF	11.77	2	9	11.82	12.02	6.235	69.282	0.8635	High		1295	1305	QEKLQEEKAKF	11.77	2	9	11.77	12.02	6.251	69.461	0.8465	High		449	456	HVRLKWCC	25.92	2	6	25.85	26.26	0.561	9.35	0.8794	High		449	456	HVRLKWCC	25.92	2	6	25.81	25.87	0.033	0.543	0.8363
1306	1321	LEQLEEQEKRKNEEMQ	11.44	3	14	11.18	11.45	10.062	71.872	0.7928	High		1306	1321	LEQLEEQEKRKNEEMQ	11.44	3	14	11.31	11.44	9.971	71.223	0.7956	High		449	457	HVRLKWCCF	31.53	2	7	31.56	31.89	0.938	13.398	0.928	High		449	457	HVRLKWCCF	31.53	2	7	31.51	31.92	0.037	0.525	0.8651
1306	1327	LEQLEEQEKRKNEEMQNVRTSL	13.19	3	20	13.02	13.34	15.257	76.285	0.8926	High		1306	1327	LEQLEEQEKRKNEEMQNVRTSL	13.19	3	20	13.03	13.31	15.391	76.956	0.8184	High		457	469	FVMLHADQDGEKL	25.28	2	11	25.34	25.64	1.936	17.603	0.9348	High		457	469	FVMLHADQDGEKL	25.28	2	11	25.29	25.59	0.46	4.185	0.9264
1310	1327	EEQEKRKNEEMQNVRTSL	12.35	3	16	12.14	12.33	10.736	67.099	0.7565	High		1310	1327	EEQEKRKNEEMQNVRTSL	12.35	3	16	12.02	12.42	10.748	67.173	0.8248	High		457	472	FVMLHADQDGEKLQAL	27.64	2	14	27.81	27.98	1.61	11.497	0.8865	High		457	472	FVMLHADQDGEKLQAL	27.64	2	14	27.82	28.14	0.445	3.179	0.8822
1328	1335	IAEQQTNF	11.29	2	6	11.19	11.51	3.096	51.606	0.8309	High		1328	1335	IAEQQTNF	11.29	2	6	11.19	11.54	3.196	53.265	0.839	High		457	472	FVMLHADQDGEKLQAL	27.64	3	14	27.64	28.05	1.735	12.394	0.9382	High		457	472	FVMLHADQDGEKLQAL	27.64	3	14	27.62	28.07	0.368	2.632	0.9276
1340	1352	TREKMRKENIIND	11.39	2	11	11.23	11.54	6.949	63.173	0.8661	High		1340	1352	TREKMRKENIIND	11.39	2	11	11.25	11.53	7.044	64.04	0.9011	High		458	472	VMLHADQDGEKLQAL	24.16	2	13	24.17	24.44	1.812	13.937	0.927	High		458	472	VMLHADQDGEKLQAL	24.16	2	13	24.26	24.42	0.49	3.772	0.9443
1340	1352	TREKMRKENIIND	11.39	3	11	11.21	11.56	7.254	65.945	0.883	High		1340	1352	TREKMRKENIIND	11.39	3	11	11.19	11.58	7.291	66.284	0.8869	High		458	472	VMLHADQDGEKLQAL	24.16	3	13	24.18	24.47	1.75	13.459	0.925	High		458	472	VMLHADQDGEKLQAL	24.16	3	13	24.18	24.4	0.418	3.217	0.9262
1340	1372	TREKMRKENIINDLSDKLKSTMQQQERDKDLIE	15.73	3	31	15.45	15.63	18.276	58.956	0.9027	High		1340	1372	TREKMRKENIINDLSDKLKSTMQQQERDKDLIE	15.73	3	31	15.47	15.68	18.637	60.118	0.8459	High		461	469	HADQDGEKL	12.76	2	7	12.83	13.02	1.472	21.032	0.9	High		461	469	HADQDGEKL	12.76	2	7	12.82	12.98	0.429	6.123	0.8781
1340	1372	TREKMRKENIINDLSDKLKSTMQQQERDKDLIE	15.73	4	31	15.45	15.61	18.878	60.898	0.9027	High		1340	1372	TREKMRKENIINDLSDKLKSTMQQQERDKDLIE	15.73	4	31	15.41	15.63	19.149	61.772	0.8857	High		461	472	HADQDGEKLQAL	19.79	2	10	19.82	20.08	1.076	10.758	0.9339	High		461	472	HADQDGEKLQAL	19.79	2	10	19.74	20.13	0.345	3.447	0.9469
1340	1374	TREKMRKENIINDLSDKLKSTMQQQERDKDLIESL	16.43	4	33	16.32	16.62	20.547	62.263	0.5429	High		1340	1374	TREKMRKENIINDLSDKLKSTMQQQERDKDLIESL	16.43	4	33	16.39	16.59	20.514	62.164	0.5764	High		480	487	LERVKIVE	19.51	2	6	19.62	19.98	1.727	28.783	0.8687	High		480	487	LERVKIVE	19.51	2	6	19.5	19.95	1.388	23.127	0.8867
1353	1372	LSDKLKSTMQQQERDKDLIE	13.11	2	18	12.81	13.12	10.638	59.098	0.858	High		1353	1372	LSDKLKSTMQQQERDKDLIE	13.11	2	18	12.93	13.13	10.711	59.503	0.8179	High		480	488	LERVKIVEA	20.09	2	7	20.09	20.44	2.28	32.566	0.9059	High		480	488	LERVKIVEA	20.09	2	7	20.02	20.33	1.685	24.065	0.8877
1353	1374	LSDKLKSTMQQQERDKDLIESL	14.88	3	20	14.84	14.97	11.701	58.506	0.8232	High		1353	1374	LSDKLKSTMQQQERDKDLIESL	14.88	3	20	14.79	15.14	11.781	58.904	0.8732	High		480	489	LERVKIVEAL	25.62	2	8	25.62	25.86	2.4	30	0.8855	High		480	489	LERVKIVEAL	25.62	2	8	25.52	25.91	1.775	22.189	0.9087
1373	1381	SLSEDRARL	11.85	2	7	11.87	11.98	1.449	20.701	0.7982	High		1373	1381	SLSEDRARL	11.85	2	7	11.85	12.05	1.449	20.699	0.757	High		480	495	LERVKIVEALSTVPQM	30.03	2	13	29.99	30.38	3.916	30.125	0.9059	High		480	495	LERVKIVEALSTVPQM	30.03	2	13	29.98	30.31	2.925	22.501	0.9303
1373	1395	SLSEDRARLLEEKKKLEEEVSKL	15.81	3	21	15.66	16.07	3.835	18.261	0.9182	High		1373	1395	SLSEDRARLLEEKKKLEEEVSKL	15.81	3	21	15.65	16.09	3.956	18.838	0.9283	High		480	495	LERVKIVEALSTVPQM	30.03	3	13	30.06	30.33	3.912	30.091	0.8756	High		480	495	LERVKIVEALSTVPQM	30.03	3	13	30.01	30.35	2.87	22.075	0.8859
1373	1412	SLSEDRARLLEEKKKLEEEVSKLRSSSFVPSPYVATAPEL	16.45	4	35	16.01	16.36	13.845	39.556	0.9349	High		1373	1412	SLSEDRARLLEEKKKLEEEVSKLRSSSFVPSPYVATAPEL	16.45	4	35	15.99	16.45	14.083	40.237	0.9066	High		488	495	ALSTVPQM	20.5	2	5	20.45	20.78	1.192	23.832	0.8159	High		488	495	ALSTVPQM	20.5	2	5	20.42	20.74	0.761	15.222	0.8718
1375	1395	SEDRARLLEEKKKLEEEVSKL	15.23	3	19	14.94	15.13	3.294	17.338	0.7196	High		1375	1395	SEDRARLLEEKKKLEEEVSKL	15.23	3	19	14.94	15.15	3.339	17.575	0.806	High		499	520	AVVEVVRRKMFIKHYREWAGAL	30.76	3	20	31.27	31.48	2.647	13.237	0.8804	High		499	520	AVVEVVRRKMFIKHYREWAGAL	30.76	3	20	31.26	31.49	2.65	13.252	0.8547
1382	1395	LEEKKKLEEEVSKL	13.7	2	12	13.55	13.91	2.662	22.183	0.9224	High		1382	1395	LEEKKKLEEEVSKL	13.7	2	12	13.57	13.95	2.703	22.525	0.9204	High		500	520	VVEVVRRKMFIKHYREWAGAL	30.13	3	19	29.8	30.07	0.998	5.253	0.9265	High		500	520	VVEVVRRKMFIKHYREWAGAL	30.13	3	19	29.73	29.92	1.12	5.894	0.8291
1382	1395	LEEKKKLEEEVSKL	13.7	3	12	13.63	13.78	2.7	22.498	0.9274	High		1382	1395	LEEKKKLEEEVSKL	13.7	3	12	13.63	13.92	2.734	22.787	0.9186	High		500	520	VVEVVRRKMFIKHYREWAGAL	30.13	4	19	29.71	30.13	1.082	5.697	0.836	High		500	520	VVEVVRRKMFIKHYREWAGAL	30.13	4	19	29.89	29.98	1.186	6.241	0.8352
1382	1412	LEEKKKLEEEVSKLRSSSFVPSPYVATAPEL	15.13	3	26	15.02	15.45	12.741	49.004	0.9281	High		1382	1412	LEEKKKLEEEVSKLRSSSFVPSPYVATAPEL	15.13	3	26	14.99	15.54	12.834	49.363	0.9277	High		501	520	VEVVRRKMFIKHYREWAGAL	29.34	3	18	29.11	29.3	0.95	5.279	0.8584	High		501	520	VEVVRRKMFIKHYREWAGAL	29.34	3	18	29.15	29.22	1.122	6.231	0.8334
1396	1412	RSSSFVPSPYVATAPEL	14.14	2	12	13.95	14.58	8.234	68.618	0.7894	High		1396	1412	RSSSFVPSPYVATAPEL	14.14	2	12	13.97	14.59	7.975	66.46	0.8119	High		503	515	VVRRKMFIKHYRE	20.35	2	11	20.21	20.52	0.419	3.806	0.8814	High		503	515	VVRRKMFIKHYRE	20.35	2	11	20.32	20.42	0.718	6.526	0.9009
1413	1430	YGACAPELPGESDRSAVE	12.54	2	14	12.45	12.65	8.313	59.38	0.9134	High		1413	1430	YGACAPELPGESDRSAVE	12.54	2	14	12.45	12.67	8.291	59.218	0.9105	High		503	515	VVRRKMFIKHYRE	20.35	3	11	20.17	20.61	0.498	4.529	0.9424	High		503	515	VVRRKMFIKHYRE	20.35	3	11	20.1	20.6	0.662	6.016	0.9366
1413	1441	YGACAPELPGESDRSAVETADEGRVDSAM	13.68	3	25	13.45	13.85	15.273	61.092	0.8954	High		1413	1441	YGACAPELPGESDRSAVETADEGRVDSAM	13.68	3	25	13.48	13.81	15.424	61.695	0.8942	High		503	515	VVRRKMFIKHYRE	20.35	4	11	20.31	20.45	0.421	3.824	0.8486	High		503	515	VVRRKMFIKHYRE	20.35	4	11	20.17	20.53	0.527	4.789	0.828
1418	1430	PELPGESDRSAVE	11.58	2	10	11.38	11.6	6.352	63.525	0.738	High		1418	1430	PELPGESDRSAVE	11.58	2	10	11.39	11.59	6.296	62.961	0.8964	High		503	519	VVRRKMFIKHYREWAGA	24.99	3	15	24.87	25.01	0.706	4.71	0.8686	High		503	519	VVRRKMFIKHYREWAGA	24.99	3	15	24.76	25.03	0.821	5.472	0.8538
1431	1441	TADEGRVDSAM	10.79	2	9	10.74	11.21	5.222	58.019	0.8973	High		1431	1441	TADEGRVDSAM	10.79	2	9	10.74	11.25	5.311	59.006	0.8899	High		503	520	VVRRKMFIKHYREWAGAL	28.1	2	16	28.21	28.5	0.944	5.903	0.942	High		503	520	VVRRKMFIKHYREWAGAL	28.1	2	16	28.08	28.62	1.012	6.324	0.9261
1431	1442	TADEGRVDSAME	10.81	2	10	10.7	10.98	6.186	61.864	0.75	High		1431	1442	TADEGRVDSAME	10.81	2	10	10.69	11	6.136	61.359	0.8483	High		503	520	VVRRKMFIKHYREWAGAL	28.1	3	16	28.2	28.44	0.964	6.025	0.936	High		503	520	VVRRKMFIKHYREWAGAL	28.1	3	16	28.18	28.44	1.031	6.444	0.9558
1446	1454	MSVQENIHM	12.86	2	7	12.65	12.99	5.117	73.098	0.8558	High		1446	1454	MSVQENIHM	12.86	2	7	12.67	13.02	5.114	73.052	0.8337	High		503	520	VVRRKMFIKHYREWAGAL	28.1	4	16	28.17	28.46	0.986	6.16	0.9397	High		503	520	VVRRKMFIKHYREWAGAL	28.1	4	16	28.19	28.48	1.09	6.81	0.9426
1446	1464	MSVQENIHMLSEEKQRIML	15.5	3	17	15.22	15.45	13.2	77.645	0.8709	High		1446	1464	MSVQENIHMLSEEKQRIML	15.5	3	17	15.23	15.48	13.551	79.711	0.8907	High		520	541	LVKDGKRLYEAEKSKRESFGKL	24.37	3	20	24.3	24.54	3.411	17.054	0.7796	High		520	541	LVKDGKRLYEAEKSKRESFGKL	24.37	3	20	24.22	24.58	1.763	8.814	0.8754
1446	1465	MSVQENIHMLSEEKQRIMLL	16.22	3	18	16.03	16.23	13.943	77.463	0.7155	High		1446	1465	MSVQENIHMLSEEKQRIMLL	16.22	3	18	16.03	16.21	14.237	79.096	0.6971	High		520	541	LVKDGKRLYEAEKSKRESFGKL	24.37	4	20	24.37	24.49	3.559	17.796	0.7698	High		520	541	LVKDGKRLYEAEKSKRESFGKL	24.37	4	20	24.32	24.54	1.754	8.77	0.9219
1455	1464	LSEEKQRIML	13.15	2	8	13.02	13.23	5.459	68.243	0.864	High		1455	1464	LSEEKQRIML	13.15	2	8	13.01	13.21	5.597	69.963	0.8965	High		521	531	VKDGKRLYEAE	16.19	2	9	16.06	16.44	0.731	8.124	0.7934	High		521	531	VKDGKRLYEAE	16.19	2	9	16.17	16.37	0.152	1.69	0.7946
1455	1465	LSEEKQRIMLL	14.63	2	9	14.4	14.81	6.195	68.835	0.9048	High		1455	1465	LSEEKQRIMLL	14.63	2	9	14.39	14.82	6.334	70.38	0.889	High		521	538	VKDGKRLYEAEKSKRESF	21.07	3	16	20.99	21.13	2.883	18.016	0.9003	High		521	538	VKDGKRLYEAEKSKRESF	21.07	3	16	20.92	21.29	1.108	6.924	0.8866
1465	1471	LERTLQL	13.31	2	5	13.2	13.6	3.623	72.458	0.7803	High		1465	1471	LERTLQL	13.31	2	5	13.22	13.58	3.653	73.059	0.7535	High		521	541	VKDGKRLYEAEKSKRESFGKL	24.05	3	19	23.45	23.62	4.067	21.405	0.9065	High		521	541	VKDGKRLYEAEKSKRESFGKL	24.05	3	19	23.48	23.57	1.63	8.578	0.9346
1465	1483	LERTLQLKEEENKRLNQRL	12.89	4	17	12.77	13	12.376	72.803	0.8632	High		1465	1483	LERTLQLKEEENKRLNQRL	12.89	4	17	12.78	13.01	12.211	71.827	0.8461	High		521	541	VKDGKRLYEAEKSKRESFGKL	24.05	4	19	23.42	23.64	4.094	21.545	0.9025	High		521	541	VKDGKRLYEAEKSKRESFGKL	24.05	4	19	23.42	23.58	1.7	8.949	0.943
1466	1483	ERTLQLKEEENKRLNQRL	12.73	3	16	12.6	12.78	11.062	69.139	0.7559	High		1466	1483	ERTLQLKEEENKRLNQRL	12.73	3	16	12.65	12.79	11.005	68.78	0.794	High		521	541	VKDGKRLYEAEKSKRESFGKL	24.05	5	19	23.35	23.47	4.156	21.872	0.8202	High		521	541	VKDGKRLYEAEKSKRESFGKL	24.05	5	19	23.38	23.62	1.683	8.86	0.8378
1471	1483	LKEEENKRLNQRL	11.7	2	11	11.62	11.85	7.148	64.98	0.6888	High		1471	1483	LKEEENKRLNQRL	11.7	2	11	11.58	11.87	7.34	66.726	0.8687	High		528	541	YEAEKSKRESFGKL	21.64	2	12	21.44	21.68	2.924	24.369	0.8465	High		528	541	YEAEKSKRESFGKL	21.64	2	12	21.44	21.62	1.336	11.137	0.8611
1472	1483	KEEENKRLNQRL	11.24	2	10	11.2	11.52	6.158	61.578	0.8714	High		1472	1483	KEEENKRLNQRL	11.24	2	10	11.18	11.55	6.167	61.673	0.9147	High		528	541	YEAEKSKRESFGKL	21.64	3	12	21.38	21.7	3.023	25.19	0.866	High		528	541	YEAEKSKRESFGKL	21.64	3	12	21.37	21.64	1.471	12.256	0.8509
1472	1483	KEEENKRLNQRL	11.24	3	10	11.29	11.41	6.388	63.876	0.8668	High		1472	1483	KEEENKRLNQRL	11.24	3	10	11.16	11.59	6.363	63.631	0.8197	High		542	547	FRKSFL	23.86	2	4	23.79	24.1	2.684	67.106	0.7276	High		542	547	FRKSFL	23.86	2	4	23.84	23.96	2.645	66.135	0.7461
1484	1509	MSQSMSSVSSRHSEKIAIRDFQVGDL	14.8	3	24	14.72	14.98	10.894	45.39	0.7352	High		1484	1509	MSQSMSSVSSRHSEKIAIRDFQVGDL	14.8	3	24	14.75	14.91	10.954	45.641	0.7799	High		542	551	FRKSFLRNRL	24.61	3	8	24.37	24.92	4.818	60.221	0.9029	High		542	551	FRKSFLRNRL	24.61	3	8	24.4	24.75	4.717	58.965	0.8774
1484	1511	MSQSMSSVSSRHSEKIAIRDFQVGDLVL	15.99	3	26	15.95	16.35	9.765	37.556	0.8844	High		1484	1511	MSQSMSSVSSRHSEKIAIRDFQVGDLVL	15.99	3	26	15.92	16.38	10.019	38.536	0.894	High		552	562	FRGLDSWPPSF	33.96	2	7	33.68	33.99	2.946	42.089	0.8758	High		552	562	FRGLDSWPPSF	33.96	2	7	33.61	34	2.945	42.065	0.8841
1489	1509	SSVSSRHSEKIAIRDFQVGDL	14.84	3	19	14.58	14.72	7.144	37.597	0.8224	High		1489	1509	SSVSSRHSEKIAIRDFQVGDL	14.84	3	19	14.59	14.82	7.264	38.234	0.7608	High		563	574	CTQKPRKFDCEL	23.5	2	9	23.46	24.18	4.243	47.147	0.8968	High		563	574	CTQKPRKFDCEL	23.5	2	9	23.87	24.06	4.414	49.04	0.8895
1489	1511	SSVSSRHSEKIAIRDFQVGDLVL	15.97	2	21	15.94	16.17	7.748	36.895	0.8181	High		1489	1511	SSVSSRHSEKIAIRDFQVGDLVL	15.97	2	21	15.96	16.19	7.824	37.257	0.8403	High		563	579	CTQKPRKFDCELPDISL	30.72	2	13	30.58	30.72	5.783	44.481	0.7756	High		563	579	CTQKPRKFDCELPDISL	30.72	2	13	30.56	30.66	6.11	46.999	0.721
1489	1511	SSVSSRHSEKIAIRDFQVGDLVL	15.97	3	21	16.05	16.35	7.395	35.212	0.8512	High		1489	1511	SSVSSRHSEKIAIRDFQVGDLVL	15.97	3	21	16.12	16.4	7.646	36.411	0.85	High		575	583	PDISLKDLQ	24.95	2	7	24.77	25.17	2.5	35.72	0.8718	High		575	583	PDISLKDLQ	24.95	2	7	24.76	25.14	2.24	32.005	0.8912
1491	1511	VSSRHSEKIAIRDFQVGDLVL	16.08	3	19	15.96	16.18	5.062	26.64	0.9174	High		1491	1511	VSSRHSEKIAIRDFQVGDLVL	16.08	3	19	15.99	16.19	5.346	28.135	0.7851	High		575	584	PDISLKDLQF	31.35	2	8	31.27	31.62	2.827	35.334	0.8951	High		575	584	PDISLKDLQF	31.35	2	8	31.26	31.69	2.569	32.117	0.9015
1510	1523	VLIILDERHDNYVL	15.7	2	12	15.46	15.87	2.525	21.043	0.838	High		1510	1523	VLIILDERHDNYVL	15.7	2	12	15.47	15.85	2.463	20.525	0.7956	High		575	585	PDISLKDLQFL	34.29	2	9	34.03	34.28	2.745	30.504	0.8555	High		575	585	PDISLKDLQFL	34.29	2	9	33.99	34.25	2.733	30.362	0.8367
1512	1523	IILDERHDNYVL	14.13	2	10	14.12	14.16	2.565	25.649	0.92	High		1512	1523	IILDERHDNYVL	14.13	2	10	14.13	14.17	2.585	25.849	0.9164	High		580	584	KDLQF	21.24	2	3	21.13	21.55	0.305	10.15	0.9175	High		580	584	KDLQF	21.24	2	3	21.06	21.47	0.301	10.021	0.8502
1512	1523	IILDERHDNYVL	14.13	3	10	14.13	14.3	2.645	26.453	0.8858	High		1512	1523	IILDERHDNYVL	14.13	3	10	14.13	14.37	2.745	27.45	0.8633	High		584	602	FLQSFCPSEVQPFLRVPLL	38.42	2	14	38.56	38.99	5.121	36.58	0.9073	High		584	602	FLQSFCPSEVQPFLRVPLL	38.42	2	14	38.66	38.93	5.902	42.157	0.8869
1512	1524	IILDERHDNYVLF	15.84	2	11	15.72	15.84	2.155	19.595	0.8717	High		1512	1524	IILDERHDNYVLF	15.84	2	11	15.73	15.88	2.202	20.019	0.9178	High		585	597	LQSFCPSEVQPFL	31.75	2	9	31.57	31.96	1.427	15.855	0.8823	High		585	597	LQSFCPSEVQPFL	31.75	2	9	31.69	31.78	1.834	20.377	0.869
1531	1538	YFLHSESL	13.98	2	6	13.76	14.09	2.652	44.194	0.8862	High		1531	1538	YFLHSESL	13.98	2	6	13.78	14.05	2.66	44.337	0.8932	High		585	599	LQSFCPSEVQPFLRV	32.29	2	11	32.26	32.69	3.866	35.141	0.8983	High		585	599	LQSFCPSEVQPFLRV	32.29	2	11	32.5	32.61	4.259	38.718	0.8419
1531	1541	YFLHSESLPAL	15.18	2	8	15.03	15.54	3.099	38.736	0.9035	High		1531	1541	YFLHSESLPAL	15.18	2	8	15.08	15.5	3.178	39.727	0.9136	High		585	602	LQSFCPSEVQPFLRVPLL	37.61	2	13	36.99	37.16	5.176	39.817	0.9041	High		585	602	LQSFCPSEVQPFLRVPLL	37.61	2	13	37.07	37.31	5.608	43.135	0.8821
1542	1559	DLKPGEGASGASRRPWVL	14.49	2	14	14.39	14.73	7.997	57.123	0.9066	High		1542	1559	DLKPGEGASGASRRPWVL	14.49	2	14	14.37	14.75	8.063	57.595	0.9033	High		585	603	LQSFCPSEVQPFLRVPLLC	37.58	2	14	37.55	38	5.829	41.633	0.9028	High		585	603	LQSFCPSEVQPFLRVPLLC	37.58	2	14	37.56	37.72	6.746	48.187	0.8838
1542	1559	DLKPGEGASGASRRPWVL	14.49	3	14	14.29	14.79	8.285	59.176	0.8612	High		1542	1559	DLKPGEGASGASRRPWVL	14.49	3	14	14.31	14.83	8.307	59.337	0.8654	High		585	604	LQSFCPSEVQPFLRVPLLCD	37.32	2	15	37.12	37.61	5.812	38.745	0.8987	High		585	604	LQSFCPSEVQPFLRVPLLCD	37.32	2	15	37.05	37.57	6.771	45.138	0.8692
1542	1566	DLKPGEGASGASRRPWVLGKVMEKE	13.95	3	21	13.92	14.35	8.49	40.427	0.8763	High		1542	1566	DLKPGEGASGASRRPWVLGKVMEKE	13.95	3	21	13.9	14.36	8.512	40.532	0.8918	High		586	602	QSFCPSEVQPFLRVPLL	36.1	2	12	36.07	36.35	4.875	40.621	0.7939	High		586	602	QSFCPSEVQPFLRVPLL	36.1	2	12	36.06	36.35	5.668	47.235	0.8579
1560	1585	GKVMEKEYCQAKKAQNRFKVPLGTKF	14.05	3	23	13.78	14.24	12.046	52.373	0.8887	High		1560	1585	GKVMEKEYCQAKKAQNRFKVPLGTKF	14.05	3	23	13.89	14.26	12.152	52.836	0.8221	High		588	602	FCPSEVQPFLRVPLL	36.14	2	10	36.02	36.57	4.368	43.676	0.9081	High		588	602	FCPSEVQPFLRVPLL	36.14	2	10	36.27	36.54	4.821	48.205	0.9046
1560	1585	GKVMEKEYCQAKKAQNRFKVPLGTKF	14.05	4	23	13.79	14.15	13.094	56.93	0.8228	High		1560	1585	GKVMEKEYCQAKKAQNRFKVPLGTKF	14.05	4	23	13.77	14.13	12.9	56.087	0.8022	High		588	603	FCPSEVQPFLRVPLLC	37.23	2	11	36.85	37.3	5.142	46.749	0.8762	High		588	603	FCPSEVQPFLRVPLLC	37.23	2	11	36.73	37.19	6.116	55.601	0.874
1565	1585	KEYCQAKKAQNRFKVPLGTKF	13.73	3	18	13.45	13.73	10.816	60.09	0.8389	High		1565	1585	KEYCQAKKAQNRFKVPLGTKF	13.73	3	18	13.47	13.82	10.828	60.157	0.8	High		588	604	FCPSEVQPFLRVPLLCD	36.62	2	12	36.66	36.84	5.292	44.101	0.841	High		588	604	FCPSEVQPFLRVPLLCD	36.62	2	12	36.43	36.72	6.263	52.195	0.7786
1567	1585	YCQAKKAQNRFKVPLGTKF	13.64	2	16	13.47	13.84	9.995	62.471	0.8349	High		1567	1585	YCQAKKAQNRFKVPLGTKF	13.64	2	16	13.51	13.86	9.989	62.432	0.7915	High		590	602	PSEVQPFLRVPLL	34.53	2	9	34.01	34.48	3.693	41.036	0.9121	High		590	602	PSEVQPFLRVPLL	34.53	2	9	34.2	34.43	4.119	45.765	0.8789
1567	1585	YCQAKKAQNRFKVPLGTKF	13.64	3	16	13.45	13.91	10.242	64.011	0.8937	High		1567	1585	YCQAKKAQNRFKVPLGTKF	13.64	3	16	13.45	13.92	10.253	64.079	0.9009	High		603	615	CDFEPLHQHVLAL	29.81	2	10	29.65	29.99	3.861	38.609	0.8864	High		603	615	CDFEPLHQHVLAL	29.81	2	10	29.59	30.17	4.402	44.023	0.9111
1571	1585	KKAQNRFKVPLGTKF	13.51	3	12	13.38	13.73	6.927	57.722	0.8052	High		1571	1585	KKAQNRFKVPLGTKF	13.51	3	12	13.35	13.64	6.986	58.214	0.9007	High		603	625	CDFEPLHQHVLALHNLVKAAQSL	35.87	3	20	35.68	35.96	9.458	47.288	0.8866	High		603	625	CDFEPLHQHVLALHNLVKAAQSL	35.87	3	20	35.65	35.8	11.107	55.533	0.8556
1586	1601	YRVKAVSWNKKVPGAS	12.45	2	13	12.14	12.5	5.603	43.103	0.8206	High		1586	1601	YRVKAVSWNKKVPGAS	12.45	2	13	12.12	12.43	5.485	42.192	0.7486	High		603	627	CDFEPLHQHVLALHNLVKAAQSLDE	34.92	3	22	34.72	35.22	9.525	43.295	0.8974	High		603	627	CDFEPLHQHVLALHNLVKAAQSLDE	34.92	3	22	34.68	35.09	11.041	50.187	0.9137
1586	1601	YRVKAVSWNKKVPGAS	12.45	3	13	12.21	12.42	6.079	46.763	0.8393	High		1586	1601	YRVKAVSWNKKVPGAS	12.45	3	13	12.19	12.44	6.146	47.274	0.8512	High		603	635	CDFEPLHQHVLALHNLVKAAQSLDEMSQTITDL	40.11	3	30	39.92	40.19	15.762	52.541	0.8897	High		603	635	CDFEPLHQHVLALHNLVKAAQSLDEMSQTITDL	40.11	3	30	39.76	40.04	17.665	58.885	0.8946
1586	1602	YRVKAVSWNKKVPGASM	12.95	2	14	12.82	13.26	6.213	44.378	0.8962	High		1586	1602	YRVKAVSWNKKVPGASM	12.95	2	14	12.81	13.25	6.28	44.858	0.8942	High		604	615	DFEPLHQHVLAL	29.3	2	9	29.29	29.64	3.44	38.226	0.8763	High		604	615	DFEPLHQHVLAL	29.3	2	9	29.2	29.65	3.97	44.112	0.9029
1586	1602	YRVKAVSWNKKVPGASM	12.95	3	14	12.82	13.28	6.758	48.268	0.9209	High		1586	1602	YRVKAVSWNKKVPGASM	12.95	3	14	12.81	13.24	6.837	48.836	0.8619	High		604	627	DFEPLHQHVLALHNLVKAAQSLDE	34.51	3	21	34.35	34.53	9.882	47.058	0.871	High		604	627	DFEPLHQHVLALHNLVKAAQSLDE	34.51	3	21	34.33	34.5	10.853	51.679	0.8748
1586	1609	YRVKAVSWNKKVPGASMKIEEGKL	13.77	3	21	13.58	13.94	9.333	44.442	0.8911	High		1586	1609	YRVKAVSWNKKVPGASMKIEEGKL	13.77	3	21	13.57	13.93	9.444	44.971	0.864	High		605	615	FEPLHQHVLAL	27.92	2	8	27.93	28.26	2.889	36.118	0.8259	High		605	615	FEPLHQHVLAL	27.92	2	8	28.06	28.28	3.34	41.753	0.8683
																										605	627	FEPLHQHVLALHNLVKAAQSLDE	33.64	3	20	33.28	33.64	9.133	45.666	0.8956	High		605	627	FEPLHQHVLALHNLVKAAQSLDE	33.64	3	20	33.27	33.58	10.154	50.77	0.8992
																										606	615	EPLHQHVLAL	24.65	2	8	24.64	24.84	3.033	37.911	0.8819	High		606	615	EPLHQHVLAL	24.65	2	8	24.7	24.76	3.262	40.775	0.853
																										616	625	HNLVKAAQSL	22.02	2	8	21.53	21.98	5.315	66.437	0.7836	High		616	625	HNLVKAAQSL	22.02	2	8	21.41	22.06	5.618	70.224	0.8309
																										626	635	DEMSQTITDL	26.87	2	8	26.73	26.92	4.15	51.872	0.8519	High		626	635	DEMSQTITDL	26.87	2	8	26.72	27.07	4.434	55.426	0.8814
																										636	656	LSEQKASVSQTSPQSASSPRM	17.29	2	17	17.18	17.77	10.9	64.117	0.8976	High		636	656	LSEQKASVSQTSPQSASSPRM	17.29	2	17	17.57	17.83	11.133	65.488	0.9175
																										636	656	LSEQKASVSQTSPQSASSPRM	17.29	3	17	17.18	17.47	10.864	63.906	0.9345	High		636	656	LSEQKASVSQTSPQSASSPRM	17.29	3	17	17.43	17.68	11.163	65.663	0.9284
																										657	681	ESTAGITTTTSPRTPPPLTVQDPLC	26.57	2	18	26.45	26.6	11.122	61.786	0.8809	High		657	681	ESTAGITTTTSPRTPPPLTVQDPLC	26.57	2	18	26.42	26.74	11.375	63.194	0.8544
																										657	685	ESTAGITTTTSPRTPPPLTVQDPLCPAVC	28.5	3	21	28.54	28.75	10.847	51.652	0.9018	High		657	685	ESTAGITTTTSPRTPPPLTVQDPLCPAVC	28.5	3	21	28.39	28.93	11.334	53.971	0.905
																										682	701	PAVCPLEELSPDSIDAHTFD	32.36	2	16	32.08	32.4	7.69	48.064	0.8074	High		682	701	PAVCPLEELSPDSIDAHTFD	32.36	2	16	32.23	32.47	7.835	48.97	0.8928
																										686	701	PLEELSPDSIDAHTFD	27.75	2	13	27.66	27.87	5.779	44.455	0.9187	High		686	701	PLEELSPDSIDAHTFD	27.75	2	13	27.84	28.04	5.808	44.678	0.9012
																										686	702	PLEELSPDSIDAHTFDF	32.98	2	14	32.74	32.76	5.885	42.038	0.6694	High		686	702	PLEELSPDSIDAHTFDF	32.98	2	14	32.65	32.81	6.109	43.634	0.8248
																										702	716	FETIPHPNIEQTIHQ	25.18	2	11	25.09	25.29	6.821	62.008	0.8734	High		702	716	FETIPHPNIEQTIHQ	25.18	2	11	24.92	25.25	7.003	63.666	0.8978
																										702	716	FETIPHPNIEQTIHQ	25.18	3	11	25.06	25.23	6.836	62.141	0.9186	High		702	716	FETIPHPNIEQTIHQ	25.18	3	11	24.95	25.24	7.071	64.282	0.8832
																										702	718	FETIPHPNIEQTIHQVS	27.78	2	13	27.58	27.77	8.27	63.614	0.8743	High		702	718	FETIPHPNIEQTIHQVS	27.78	2	13	27.6	27.77	8.299	63.839	0.7997
																										702	719	FETIPHPNIEQTIHQVSL	30.8	2	14	30.48	30.62	9.038	64.554	0.8856	High		702	719	FETIPHPNIEQTIHQVSL	30.8	2	14	30.46	30.78	9.211	65.796	0.858
																										702	719	FETIPHPNIEQTIHQVSL	30.8	3	14	30.53	30.79	8.974	64.102	0.8772	High		702	719	FETIPHPNIEQTIHQVSL	30.8	3	14	30.57	30.78	9.114	65.099	0.8915
																										702	721	FETIPHPNIEQTIHQVSLDL	36.25	2	16	35.66	35.95	10.311	64.442	0.9158	High		702	721	FETIPHPNIEQTIHQVSLDL	36.25	2	16	35.72	35.94	10.531	65.821	0.9318
																										702	721	FETIPHPNIEQTIHQVSLDL	36.25	3	16	35.72	35.95	10.305	64.405	0.8999	High		702	721	FETIPHPNIEQTIHQVSLDL	36.25	3	16	35.73	36.08	10.468	65.426	0.916
																										703	716	ETIPHPNIEQTIHQ	23.04	2	10	22.81	23.1	5.923	59.231	0.814	High		703	716	ETIPHPNIEQTIHQ	23.04	2	10	22.8	23.13	6.089	60.892	0.832
																										703	718	ETIPHPNIEQTIHQVS	26.17	2	12	25.75	26.02	7.984	66.531	0.8212	High		703	718	ETIPHPNIEQTIHQVS	26.17	2	12	25.75	25.94	8.047	67.062	0.8081
																										703	721	ETIPHPNIEQTIHQVSLDL	34.82	2	15	34.6	35.06	9.763	65.086	0.9152	High		703	721	ETIPHPNIEQTIHQVSLDL	34.82	2	15	34.67	34.95	10.044	66.961	0.9127
																										703	721	ETIPHPNIEQTIHQVSLDL	34.82	3	15	34.72	34.94	9.756	65.04	0.9188	High		703	721	ETIPHPNIEQTIHQVSLDL	34.82	3	15	34.73	34.89	10.036	66.906	0.9035
																										744	759	NLSSPNPISDPQSPEM	22.96	2	10	22.19	22.46	3.515	35.151	0.8896	High		744	759	NLSSPNPISDPQSPEM	22.96	2	10	22.02	22.43	3.804	38.043	0.8953
																										765	794	YSSVINAIDSRRMQDTNVCGKEDFGDHTSL	29.33	3	28	29.13	29.48	10.771	38.466	0.8591	High		765	794	YSSVINAIDSRRMQDTNVCGKEDFGDHTSL	29.33	3	28	29.08	29.45	10.452	37.329	0.8893
																										772	794	IDSRRMQDTNVCGKEDFGDHTSL	23.99	3	21	24.01	24.41	7.15	34.048	0.9024	High		772	794	IDSRRMQDTNVCGKEDFGDHTSL	23.99	3	21	23.94	24.44	7.335	34.927	0.9088
																										799	810	ERCRVVAQDSHF	20.4	2	10	20.55	20.71	2.579	25.79	0.8353	High		799	810	ERCRVVAQDSHF	20.4	2	10	20.2	20.39	2.313	23.135	0.734
																										802	810	RVVAQDSHF	17.77	2	7	17.73	18.15	2.607	37.241	0.8276	High		802	810	RVVAQDSHF	17.77	2	7	17.64	17.76	2.412	34.462	0.7422
																										811	822	SIQTIKEDLCHF	32.45	2	10	32.39	32.65	0.188	1.878	0.8331	High		811	822	SIQTIKEDLCHF	32.45	2	10	32.39	32.65	0.154	1.545	0.9121
																										811	833	SIQTIKEDLCHFRTFVQKEQCDF	38.1	3	21	37.44	37.63	4.145	19.739	0.5833	High		811	833	SIQTIKEDLCHFRTFVQKEQCDF	38.1	3	21	37.41	37.7	4.126	19.647	0.828
																										842	849	VEIRNIIE	23.84	2	6	23.63	23.87	2.62	43.669	0.8069	High		842	849	VEIRNIIE	23.84	2	6	23.58	23.94	2.726	45.43	0.7932
																										842	855	VEIRNIIEKVKCSL	33.69	2	12	33.3	33.57	6.595	54.961	0.7936	High		842	855	VEIRNIIEKVKCSL	33.69	2	12	33.33	33.46	6.568	54.729	0.8385
[truncated: 227 more rows]
[truncated: 37 more columns]
